# Supplementary material for: Longitudinal cervicovaginal microbiome and virome alterations during ART and discordant shedding in women living with HIV
Source: Research Square preprint supplement (doi:10.21203/rs.3.rs-4078561/v1), 2024-04-15
Supplement: Supplementary file 1 [file 7146688a4378e16da38f748e.xlsx]

## Sheet: 1. Samples
Supplementary Table 1: Samples and metadata
Sample	Patient	Shedder or non-shedder	Study visit	Days since initial visit (ART duration)	CD4 count	Discordant timepoint (shedders)	Equivalent timepoints for non-shedders	Sample type	Bacterial vaginosis
CVL_001	103	Non-shedder	9	728	370	NA	Not discordant-equivalent	CVL	No data
CVL_002	38	Shedder	6	453	No data	Not discordant	NA	CVL	No BV
CVL_003	10	Shedder	1	0	99	Not discordant	NA	CVL	No data
CVL_004	10	Shedder	3	164	No data	Not discordant	NA	CVL	No data
CVL_005	26	Shedder	1	0	190	Not discordant	NA	CVL	No data
CVL_006	38	Shedder	1	0	232	Not discordant	NA	CVL	No BV
CVL_007	89	Shedder	9	713	No data	Not discordant	NA	CVL	No data
CVL_008	26	Shedder	3	194	166	Discordant	NA	CVL	No data
CVL_009	109	Non-shedder	1	0	64	NA	Not discordant-equivalent	CVL	BV
CVL_010	22	Non-shedder	1	0	247	NA	Not discordant-equivalent	CVL	No data
CVL_011	14	Non-shedder	1	0	181	NA	Not discordant-equivalent	CVL	No BV
CVL_012	46	Non-shedder	1	0	50	NA	Not discordant-equivalent	CVL	BV
CVL_013	100	Non-shedder	1	0	204	NA	Not discordant-equivalent	CVL	No BV
CVL_014	103	Non-shedder	1	0	12	NA	Not discordant-equivalent	CVL	BV
CVL_015	105	Non-shedder	1	0	149	NA	Not discordant-equivalent	Vaginal swab	BV
CVL_016	12	Non-shedder	9	708	377	NA	Not discordant-equivalent	CVL	No data
CVL_017	106	Non-shedder	8	623	No data	NA	Not discordant-equivalent	CVL	No data
CVL_018	83	Non-shedder	5	353	202	NA	Discordant-equivalent	CVL	No data
CVL_019	104	Non-shedder	6	443	No data	NA	Discordant-equivalent	CVL	No data
CVL_020	80	Non-shedder	9	732	216	NA	Not discordant-equivalent	CVL	No data
CVL_021	92	Non-shedder	9	706	293	NA	Not discordant-equivalent	CVL	No data
CVL_022	80	Non-shedder	1	0	18	NA	Not discordant-equivalent	CVL	No BV
CVL_023	106	Non-shedder	3	169	283	NA	Not discordant-equivalent	CVL	No data
CVL_024	102	Non-shedder	9	748	293	NA	Not discordant-equivalent	CVL	No data
CVL_025	104	Non-shedder	9	733	420	NA	Not discordant-equivalent	CVL	No data
CVL_026	108	Non-shedder	9	728	359	NA	Not discordant-equivalent	CVL	No data
CVL_027	10	Shedder	8	643	No data	Not discordant	NA	CVL	No data
CVL_028	23	Shedder	6	464	No data	Discordant	NA	CVL	No data
CVL_029	26	Shedder	8	645	No data	Not discordant	NA	CVL	No data
CVL_030	86	Shedder	4	276	No data	Discordant	NA	CVL	No data
CVL_031	86	Shedder	5	386	321	Discordant	NA	TearFlo strip	BV
CVL_032	84	Shedder	7	544	524	Discordant	NA	CVL	No data
CVL_033	27	Shedder	1	0	223	Not discordant	NA	CVL	BV
CVL_034	38	Shedder	9	728	507	Not discordant	NA	CVL	No data
CVL_035	109	Non-shedder	9	735	596	NA	Not discordant-equivalent	CVL	No data
CVL_036	83	Non-shedder	1	0	95	NA	Not discordant-equivalent	CVL	BV
CVL_037	22	Non-shedder	7	549	469	NA	Not discordant-equivalent	CVL	No data
CVL_038	95	Non-shedder	1	0	322	NA	Not discordant-equivalent	CVL	No data
CVL_039	106	Non-shedder	4	267	No data	NA	Discordant-equivalent	CVL	No data
CVL_040	80	Non-shedder	7	549	No data	NA	Not discordant-equivalent	CVL	No data
CVL_041	21	Non-shedder	3	172	194	NA	Not discordant-equivalent	CVL	No data
CVL_042	102	Non-shedder	6	447	No data	NA	Discordant-equivalent	CVL	No data
CVL_043	21	Non-shedder	4	279	No data	NA	Discordant-equivalent	CVL	No data
CVL_044	82	Non-shedder	9	728	402	NA	Not discordant-equivalent	CVL	No data
CVL_045	82	Non-shedder	1	0	206	NA	Not discordant-equivalent	CVL	BV
CVL_046	33	Non-shedder	6	431	No data	NA	Not discordant-equivalent	CVL	No data
CVL_047	106	Non-shedder	9	731	267	NA	Discordant-equivalent	CVL	No data
CVL_048	15	Shedder	2	95	No data	Not discordant	NA	CVL	No data
CVL_049	86	Shedder	1	0	89	Not discordant	NA	Vaginal swab	No BV
CVL_050	89	Shedder	1	0	132	Not discordant	NA	Cytobrush	BV
CVL_051	89	Shedder	5	375	395	Discordant	NA	CVL	BV
CVL_052	19	Non-shedder	9	732	303	NA	Not discordant-equivalent	CVL	No data
CVL_053	22	Non-shedder	9	713	465	NA	Not discordant-equivalent	CVL	No data
CVL_054	106	Non-shedder	1	0	184	NA	Not discordant-equivalent	CVL	BV
CVL_055	108	Non-shedder	1	0	274	NA	Not discordant-equivalent	CVL	BV
CVL_056	21	Non-shedder	1	0	195	NA	Not discordant-equivalent	CVL	No data
CVL_057	12	Non-shedder	1	0	32	NA	Not discordant-equivalent	CVL	No BV
CVL_058	83	Non-shedder	9	728	435	NA	Not discordant-equivalent	CVL	No data
CVL_059	102	Non-shedder	1	0	133	NA	Not discordant-equivalent	CVL	No data
CVL_060	23	Shedder	4	286	No data	Not discordant	NA	CVL	No data
CVL_061	21	Non-shedder	8	637	No data	NA	Not discordant-equivalent	CVL	No data
CVL_062	92	Non-shedder	1	0	123	NA	Not discordant-equivalent	CVL	BV
CVL_063	98	Non-shedder	1	0	55	NA	Not discordant-equivalent	CVL	No BV
CVL_064	20	Non-shedder	6	448	No data	NA	Discordant-equivalent	CVL	BV
CVL_065	27	Shedder	7	551	382	Not discordant	NA	CVL	No data
CVL_066	82	Non-shedder	6	457	No data	NA	Discordant-equivalent	CVL	No data
CVL_067	20	Non-shedder	9	728	597	NA	Not discordant-equivalent	CVL	No data
CVL_068	83	Non-shedder	7	524	322	NA	Not discordant-equivalent	CVL	No data
CVL_069	84	Shedder	6	453	No data	Not discordant	NA	CVL	No data
CVL_070	100	Non-shedder	9	738	729	NA	Not discordant-equivalent	CVL	No data
CVL_071	105	Non-shedder	9	735	367	NA	Not discordant-equivalent	CVL	No data
CVL_072	23	Shedder	8	638	No data	Not discordant	NA	CVL	No data
CVL_073	15	Shedder	6	458	No data	Discordant	NA	CVL	No BV
CVL_074	10	Shedder	4	259	No data	Discordant	NA	CVL	No data
CVL_075	27	Shedder	9	732	520	Not discordant	NA	CVL	No data
CVL_076	84	Shedder	9	719	519	Not discordant	NA	CVL	No data
CVL_077	86	Shedder	9	710	416	Not discordant	NA	CVL	No data
CVL_078	84	Shedder	1	0	41	Not discordant	NA	CVL	BV
CVL_079	27	Shedder	5	370	351	Discordant	NA	CVL	No BV
CVL_080	15	Shedder	9	750	220	Not discordant	NA	CVL	No data
CVL_081	23	Shedder	1	0	370	Not discordant	NA	Cytobrush	No data
CVL_082	21	Non-shedder	9	742	254	NA	Discordant-equivalent	CVL	No data
CVL_083	19	Non-shedder	1	0	32	NA	Not discordant-equivalent	CVL	No data
CVL_084	14	Non-shedder	9	747	342	NA	Not discordant-equivalent	CVL	No data
CVL_085	46	Non-shedder	9	732	317	NA	Not discordant-equivalent	CVL	No data
CVL_086	104	Non-shedder	1	0	311	NA	Not discordant-equivalent	CVL	No data
CVL_087	95	Non-shedder	9	718	341	NA	Not discordant-equivalent	CVL	No data
CVL_088	98	Non-shedder	9	750	354	NA	Not discordant-equivalent	CVL	No data
CVL_089	20	Non-shedder	1	0	246	NA	Not discordant-equivalent	CVL	BV
CVL_090	103	Non-shedder	6	447	No data	NA	Not discordant-equivalent	CVL	No data
CVL_091	103	Non-shedder	7	538	427	NA	Discordant-equivalent	CVL	No data
CVL_092	12	Non-shedder	5	347	454	NA	Discordant-equivalent	CVL	No data
CVL_093	14	Non-shedder	5	370	316	NA	Not discordant-equivalent	CVL	No data
CVL_094	20	Non-shedder	5	381	365	NA	Not discordant-equivalent	CVL	No data
CVL_095	46	Non-shedder	4	284	No data	NA	Not discordant-equivalent	CVL	No data
CVL_096	38	Shedder	5	372	464	Discordant	NA	CVL	BV
CVL_097	95	Non-shedder	3	189	347	NA	Discordant-equivalent	CVL	No data
CVL_098	80	Non-shedder	5	367	179	NA	Discordant-equivalent	CVL	No data
CVL_099	92	Non-shedder	4	275	No data	NA	Discordant-equivalent	CVL	No data
CVL_100	89	Shedder	4	287	No data	Not discordant	NA	CVL	No BV
CVL_101	92	Non-shedder	5	365	No data	NA	Discordant-equivalent	CVL	No data
CVL_102	100	Non-shedder	4	267	No data	NA	Not discordant-equivalent	CVL	No data
CVL_103	102	Non-shedder	4	270	No data	NA	Not discordant-equivalent	CVL	No data
CVL_104	95	Non-shedder	5	372	No data	NA	Not discordant-equivalent	CVL	No data
CVL_105	98	Non-shedder	5	374	No data	NA	Discordant-equivalent	CVL	No data
CVL_106	33	Non-shedder	9	714	212	NA	Not discordant-equivalent	CVL	No data
CVL_107	100	Non-shedder	5	374	363	NA	Discordant-equivalent	CVL	No data
CVL_108	104	Non-shedder	5	365	422	NA	Not discordant-equivalent	CVL	No data
CVL_109	98	Non-shedder	6	455	No data	NA	Not discordant-equivalent	CVL	No data
CVL_110	109	Non-shedder	5	365	482	NA	Discordant-equivalent	CVL	No data
CVL_111	108	Non-shedder	6	448	No data	NA	Discordant-equivalent	CVL	No data
CVL_112	19	Non-shedder	5	354	249	NA	Discordant-equivalent	CVL	No data
CVL_113	19	Non-shedder	6	463	No data	NA	Not discordant-equivalent	CVL	No data
CVL_114	14	Non-shedder	3	189	174	NA	Discordant-equivalent	CVL	No data
CVL_115	15	Shedder	5	361	199	Not discordant	NA	CVL	BV
CVL_116	46	Non-shedder	5	364	373	NA	Discordant-equivalent	CVL	No BV
CVL_117	33	Non-shedder	7	539	222	NA	Discordant-equivalent	CVL	No data
CVL_118	105	Non-shedder	4	269	No data	NA	Discordant-equivalent	CVL	No data
CVL_119	108	Non-shedder	4	274	No data	NA	Not discordant-equivalent	CVL	No data
CVL_120	105	Non-shedder	5	389	383	NA	Discordant-equivalent	CVL	No data
CVL_121	109	Non-shedder	4	279	No data	NA	Not discordant-equivalent	CVL	No data
CVL_122	33	Non-shedder	1	0	33	NA	Not discordant-equivalent	CVL	BV
CVL_123	26	Shedder	5	364	283	Not discordant	NA	CVL	No data
CVL_124	10	Shedder	9	721	231	Discordant	NA	CVL	No data
CVL_125	12	Non-shedder	4	254	No data	NA	Not discordant-equivalent	CVL	No data

## Sheet: 2. Logit models
Supplementary Table 2: Multinomial logistic regression models
Multinomial logistic regression, microbiome cluster vs time and shedder/non-shedder status
Model structure:	Cluster ~ Shedder_status + Days_since_visit1, random=~1|PatientID
Repeat model with each cluster as reference and readjust p values for multiple comparisons.
Results:	Estimate	Std. Error	z value	Pr(>|z|)	reference	comparison	p.adjusted	Notes
	1.99046	0.926564	2.14822	0.0316965	Cluster1	Cluster5~Shedder_statusShedder	0.158483
	-22.1172	2.50682933110904e-10	-8.82277e+10	0	Cluster1	Cluster3~Shedder_statusShedder	0	Cluster3 is two samples from the same non-shedder individual.
	2.93239	1.41598	2.07093	0.0383651	Cluster1	Cluster6~Shedder_statusShedder	0.164422
	1.44204	0.947274	1.5223	0.127934	Cluster1	Cluster2~Shedder_statusShedder	0.391918
	1.3484	0.903788	1.49195	0.135713	Cluster1	Cluster4~Shedder_statusShedder	0.391918
	-0.000911694	0.00117535	-0.775681	0.437937	Cluster1	Cluster5~Days_since_visit1	0.664808
	0.00133733	0.00288479	0.463581	0.642948	Cluster1	Cluster3~Days_since_visit1	0.858794
	0.000697249	0.00222795	0.312955	0.754315	Cluster1	Cluster6~Days_since_visit1	0.901541
	0.00172451	0.00120617	1.42974	0.152791	Cluster1	Cluster2~Days_since_visit1	0.391918
	6.50117880393211e-05	0.000982473	0.0661716	0.947241	Cluster1	Cluster4~Days_since_visit1	0.947241
	-24.0691	1.48372562348556e-10	-1.6222e+11	0	Cluster5	Cluster3~Shedder_statusShedder	0	Cluster3 is two samples from the same non-shedder individual.
	1.3219	1.25993	1.04919	0.294093	Cluster5	Cluster6~Shedder_statusShedder	0.588185
	-0.341883	0.773297	-0.442111	0.658409	Cluster5	Cluster2~Shedder_statusShedder	0.858794
	-0.578834	0.692748	-0.835561	0.403402	Cluster5	Cluster4~Shedder_statusShedder	0.664808
	0.00238316	0.00290687	0.819837	0.412309	Cluster5	Cluster3~Days_since_visit1	0.664808
	0.00167594	0.00218565	0.766792	0.443205	Cluster5	Cluster6~Days_since_visit1	0.664808
	0.00252373	0.00128797	1.95946	0.0500587	Cluster5	Cluster2~Days_since_visit1	0.18772
	0.000938443	0.00104989	0.893851	0.371402	Cluster5	Cluster4~Days_since_visit1	0.664808
	25.2995	0.913018	27.7097	5.33008726489914e-169	Cluster3	Cluster6~Shedder_statusShedder	3.19805235893948e-168	Cluster3 is two samples from the same non-shedder individual.
	23.9098	0.644092	37.1217	1.25427885037504e-301	Cluster3	Cluster2~Shedder_statusShedder	1.25427885037504e-300	Cluster3 is two samples from the same non-shedder individual.
	23.6694	0.639446	37.0154	6.46237876419304e-300	Cluster3	Cluster4~Shedder_statusShedder	4.84678407314478e-299	Cluster3 is two samples from the same non-shedder individual.
	-0.000369075	0.0037016	-0.0997067	0.920577	Cluster3	Cluster6~Days_since_visit1	0.947241
	0.000381938	0.00311494	0.122615	0.902412	Cluster3	Cluster2~Days_since_visit1	0.947241
	-0.00120422	0.00302907	-0.397553	0.690959	Cluster3	Cluster4~Days_since_visit1	0.863699
	-1.63718	1.33044	-1.23056	0.218489	Cluster6	Cluster2~Shedder_statusShedder	0.46819
	-1.81148	1.27927	-1.41603	0.156767	Cluster6	Cluster4~Shedder_statusShedder	0.391918
	0.000614214	0.00221275	0.277579	0.781336	Cluster6	Cluster2~Days_since_visit1	0.901541
	-0.000923991	0.00208381	-0.443413	0.657467	Cluster6	Cluster4~Days_since_visit1	0.858794
	-0.184884	0.834804	-0.22147	0.824726	Cluster2	Cluster4~Shedder_statusShedder	0.916363
	-0.00152211	0.00117848	-1.29158	0.196501	Cluster2	Cluster4~Days_since_visit1	0.453464
Multinomial logistic regression, microbiome cluster vs discordant shedding events
Model structure:	Cluster ~ sample_DSC, random=~1|PatientID
Repeat model with each cluster as reference and readjust p values for multiple comparisons.
Results:	Estimate	Std. Error	z value	Pr(>|z|)	reference	comparison	p.adjusted
	-25.3074	151399	-0.000167157	0.999867	Cluster1	Cluster5~sample_DSCnot_DSC	0.999869
	-25.3688	151399	-0.000167562	0.999866	Cluster1	Cluster6~sample_DSCnot_DSC	0.999869
	-24.9449	151399	-0.000164762	0.999869	Cluster1	Cluster2~sample_DSCnot_DSC	0.999869
	-25.2586	151399	-0.000166834	0.999867	Cluster1	Cluster4~sample_DSCnot_DSC	0.999869
	-0.186046	1.48915	-0.124935	0.900575	Cluster5	Cluster6~sample_DSCnot_DSC	0.999869
	0.355701	1.11375	0.319373	0.749444	Cluster5	Cluster2~sample_DSCnot_DSC	0.999869
	-0.0101933	0.908443	-0.0112207	0.991047	Cluster5	Cluster4~sample_DSCnot_DSC	0.999869
	0.606651	1.66246	0.364912	0.715177	Cluster6	Cluster2~sample_DSCnot_DSC	0.999869
	-0.503399	1.55366	-0.324009	0.745931	Cluster6	Cluster4~sample_DSCnot_DSC	0.999869
	-0.754894	1.08085	-0.698429	0.484909	Cluster2	Cluster4~sample_DSCnot_DSC	0.999869
Multinomial logistic regression, microbiome cluster vs sample type
Model structure:	Cluster~Sample_type
Repeat model with each cluster as reference and readjust p values for multiple comparisons.
Results:	Estimate	Std. Error	z value	Pr(>|z|)	reference	comparison	p.adjusted
	-17.3746	4922.35	-0.00352975	0.997184	Cluster1	Cluster5~Sample_typeCVL	1
	-2.67415	6961.25	-0.000384148	0.999693	Cluster1	Cluster3~Sample_typeCVL	1
	-1.981	6961.25	-0.000284575	0.999773	Cluster1	Cluster6~Sample_typeCVL	1
	-0.371564	6961.25	-5.3376e-05	0.999957	Cluster1	Cluster2~Sample_typeCVL	1
	-16.5637	4922.35	-0.003365	0.997315	Cluster1	Cluster4~Sample_typeCVL	1
	-17.0031	8525.76	-0.00199432	0.998409	Cluster1	Cluster5~Sample_typeswab	1
	-5.36406e-08	9844.7	-5.44868e-12	1	Cluster1	Cluster3~Sample_typeswab	1
	-2.56469e-08	9844.7	-2.60515e-12	1	Cluster1	Cluster6~Sample_typeswab	1
	17.0031	8525.76	0.00199432	0.998409	Cluster1	Cluster2~Sample_typeswab	1
	-4.56423e-08	6961.25	-6.55662e-12	1	Cluster1	Cluster4~Sample_typeswab	1
	-17.0031	12162.4	-0.00139801	0.998885	Cluster1	Cluster5~Sample_typeTFF	1
	-6.95626e-08	13120.7	-5.30175e-12	1	Cluster1	Cluster3~Sample_typeTFF	1
	-4.1562e-08	13120.7	-3.16767e-12	1	Cluster1	Cluster6~Sample_typeTFF	1
	-1.13785e-07	13120.7	-8.6722e-12	1	Cluster1	Cluster2~Sample_typeTFF	1
	0.937086	9277.72	0.000101004	0.999919	Cluster1	Cluster4~Sample_typeTFF	1
	14.4442	4330.22	0.00333567	0.997339	Cluster5	Cluster3~Sample_typeCVL	1
	15.1373	4330.22	0.00349574	0.997211	Cluster5	Cluster6~Sample_typeCVL	1
	16.7467	4330.22	0.00386742	0.996914	Cluster5	Cluster2~Sample_typeCVL	1
	0.81093	1.43952	0.563333	0.573208	Cluster5	Cluster4~Sample_typeCVL	1
	16.7467	7500.15	0.00223285	0.998218	Cluster5	Cluster3~Sample_typeswab	1
	16.7467	7500.15	0.00223285	0.998218	Cluster5	Cluster6~Sample_typeswab	1
	33.4935	6123.85	0.00546935	0.995636	Cluster5	Cluster2~Sample_typeswab	1
	16.7467	4330.22	0.00386742	0.996914	Cluster5	Cluster4~Sample_typeswab	1
	16.7467	10445.9	0.0016032	0.998721	Cluster5	Cluster3~Sample_typeTFF	1
	16.7467	10445.9	0.0016032	0.998721	Cluster5	Cluster6~Sample_typeTFF	1
	16.7467	10445.9	0.0016032	0.998721	Cluster5	Cluster2~Sample_typeTFF	1
	17.6262	6721.8	0.00262225	0.997908	Cluster5	Cluster4~Sample_typeTFF	1
	0.693147	8081.45	8.57701e-05	0.999932	Cluster3	Cluster6~Sample_typeCVL	1
	2.30259	8081.45	0.000284922	0.999773	Cluster3	Cluster2~Sample_typeCVL	1
	-14.188	5714.45	-0.00248283	0.998019	Cluster3	Cluster4~Sample_typeCVL	1
	2.38946e-08	9686.33	2.46683e-12	1	Cluster3	Cluster6~Sample_typeswab	1
	16.4728	8920.06	0.00184671	0.998527	Cluster3	Cluster2~Sample_typeswab	1
	-0.828708	6849.27	-0.000120992	0.999903	Cluster3	Cluster4~Sample_typeswab	1
	1.5462e-08	11428.9	1.35288e-12	1	Cluster3	Cluster6~Sample_typeTFF	1
	1.8222e-08	11428.9	1.59438e-12	1	Cluster3	Cluster2~Sample_typeTFF	1
	-6.92139e-09	8081.45	-8.56454e-13	1	Cluster3	Cluster4~Sample_typeTFF	1
	1.60944	6794.93	0.000236859	0.999811	Cluster6	Cluster2~Sample_typeCVL	1
	-14.5343	4804.74	-0.003025	0.997586	Cluster6	Cluster4~Sample_typeCVL	1
	16.1708	7530.78	0.0021473	0.998287	Cluster6	Cluster2~Sample_typeswab	1
	-0.783881	5798.89	-0.000135178	0.999892	Cluster6	Cluster4~Sample_typeswab	1
	-4.90266e-08	9609.48	-5.1019e-12	1	Cluster6	Cluster2~Sample_typeTFF	1
	-1.95843e-08	6794.93	-2.88219e-12	1	Cluster6	Cluster4~Sample_typeTFF	1
	-15.7551	3956.18	-0.00398241	0.996823	Cluster2	Cluster4~Sample_typeCVL	1
	-16.5661	3956.18	-0.00418739	0.996659	Cluster2	Cluster4~Sample_typeswab	1
	3.9391e-08	5594.88	7.04054e-12	1	Cluster2	Cluster4~Sample_typeTFF	1

## Sheet: 3. MaAsLin2 - pathways
Supplementary Table 3: MaAsLin2 analysis of functional pathways
Input feature table: Functional pathway relative abundance from HUMAnN3
MaAsLin2 comparing functional pathways between microbiome community clusters														MaAsLin2 comparing functional pathways between shedders/non-shedders and over time													MaAsLin2 comparing functional pathways between discordant and non-discordant timepoints among shedders
Model structure: fixed effects = Cluster, random effects = Patient ID														Model structure: fixed effects = Shedder/non-shedder status & time, random effects = Patient ID													Model structure: fixed effects = Discordant/non-discordant timepoint, random effects = Patient ID
Repeat model with each cluster as reference and readjust p values for multiple comparisons.														Subset the results for the two fixed effects and readjust the q values separately.
Results:		feature	metadata	value	coef	stderr	N	N.not.0	pval	qval	reference	qval.readjust		Results:		feature	metadata	value	coef	stderr	N	N.not.0	pval	qval	qval.readjust		Results:	feature	metadata	value	coef	stderr	N	N.not.0	pval	qval
	1	PWY.7197..pyrimidine.deoxyribonucleotide.phosphorylation	Cluster	Cluster3	0.00145981	6.63765e-05	121	76	1.05728e-39	9.83272e-37	Cluster1	2.97202e-36			1	PWY.6606..guanosine.nucleotides.degradation.II	Shedder_or_control	Shedder	3.41533e-05	1.06185e-05	121	14	0.00167536	0.623235	0.311618			UNINTEGRATED	DSC_all	not_DSC	-0.00743552	0.00539668	35	35	0.180345	0.806726
	2	PWY.922..mevalonate.pathway.I..eukaryotes.and.bacteria.	Cluster	Cluster2	0.00153971	7.97482e-05	121	66	7.01238e-38	3.26076e-35	Cluster1	9.8559e-35			4	ARGSYN.PWY..L.arginine.biosynthesis.I..via.L.ornithine.	Shedder_or_control	Shedder	1.67497e-05	1.76183e-05	121	23	0.349386	0.919024	0.990404			ANAGLYCOLYSIS.PWY..glycolysis.III..from.glucose.	DSC_all	not_DSC	-0.000128639	0.000153491	35	18	0.409516	0.806726
	3	PWY.5667..CDP.diacylglycerol.biosynthesis.I	Cluster	Cluster2	0.00151331	8.00459e-05	121	92	4.42859e-37	1.02965e-34	Cluster1	3.11219e-34			5	ARGSYNBSUB.PWY..L.arginine.biosynthesis.II..acetyl.cycle.	Shedder_or_control	Shedder	1.49517e-05	1.65374e-05	121	25	0.373101	0.919024	0.990404			ARGSYN.PWY..L.arginine.biosynthesis.I..via.L.ornithine.	DSC_all	not_DSC	-6.42788e-05	4.62017e-05	35	5	0.175523	0.806726
	4	PWY0.1319..CDP.diacylglycerol.biosynthesis.II	Cluster	Cluster2	0.00151331	7.99253e-05	121	93	3.8825e-37	1.02965e-34	Cluster1	3.11219e-34			8	ASPASN.PWY..superpathway.of.L.aspartate.and.L.asparagine.biosynthesis	Shedder_or_control	Shedder	3.80575e-05	3.89975e-05	121	67	0.336966	0.919024	0.990404			ARGSYNBSUB.PWY..L.arginine.biosynthesis.II..acetyl.cycle.	DSC_all	not_DSC	-6.4763e-05	4.53005e-05	35	5	0.164264	0.806726
	5	LACTOSECAT.PWY..lactose.and.galactose.degradation.I	Cluster	Cluster2	0.00201892	0.000114433	121	75	6.58872e-31	1.2255e-28	Cluster1	1.32292e-28			9	BRANCHED.CHAIN.AA.SYN.PWY..superpathway.of.branched.chain.amino.acid.biosynthesis	Shedder_or_control	Shedder	2.87705e-05	2.94714e-05	121	45	0.337014	0.919024	0.990404			ARO.PWY..chorismate.biosynthesis.I	DSC_all	not_DSC	0.000196419	0.000149077	35	20	0.199031	0.806726
	6	PWY.2941..L.lysine.biosynthesis.II	Cluster	Cluster4	-0.000644566	3.78781e-05	121	76	5.04107e-30	7.81366e-28	Cluster1	9.44696e-28			11	COA.PWY.1..superpathway.of.coenzyme.A.biosynthesis.III..mammals.	Shedder_or_control	Shedder	-0.00013552	0.000116572	121	108	0.255961	0.919024	0.990404			BRANCHED.CHAIN.AA.SYN.PWY..superpathway.of.branched.chain.amino.acid.biosynthesis	DSC_all	not_DSC	-6.15443e-05	5.91137e-05	35	14	0.307114	0.806726
	7	PWY.2941..L.lysine.biosynthesis.II	Cluster	Cluster2	-0.000707574	4.49011e-05	121	76	3.8625e-29	5.13161e-27	Cluster1	6.03194e-27			13	COA.PWY..coenzyme.A.biosynthesis.I..prokaryotic.	Shedder_or_control	Shedder	-0.000117667	0.000130421	121	117	0.375287	0.919024	0.990404			CITRULBIO.PWY..L.citrulline.biosynthesis	DSC_all	not_DSC	5.2918e-06	5.29516e-06	35	5	0.317842	0.806726
	8	PWY.6147..6.hydroxymethyl.dihydropterin.diphosphate.biosynthesis.I	Cluster	Cluster2	0.00153059	8.91069e-05	121	89	4.68973e-28	5.45181e-26	Cluster1	6.59142e-26			16	DTDPRHAMSYN.PWY..dTDP..beta..L.rhamnose.biosynthesis	Shedder_or_control	Shedder	0.000109505	9.0773e-05	121	71	0.237268	0.919024	0.990404			COA.PWY.1..superpathway.of.coenzyme.A.biosynthesis.III..mammals.	DSC_all	not_DSC	0.000173148	0.00015513	35	30	0.274807	0.806726
	9	PWY.6317..D.galactose.degradation.I..Leloir.pathway.	Cluster	Cluster4	-0.00063439	4.51095e-05	121	102	9.59728e-27	9.91718e-25	Cluster1	1.28466e-24			17	FASYN.ELONG.PWY..fatty.acid.elongation....saturated	Shedder_or_control	Shedder	9.78442e-06	8.50304e-06	121	16	0.262223	0.919024	0.990404			COA.PWY..coenzyme.A.biosynthesis.I..prokaryotic.	DSC_all	not_DSC	0.000170239	0.000132941	35	33	0.212166	0.806726
	10	PWY.5097..L.lysine.biosynthesis.VI	Cluster	Cluster2	-0.000722115	5.17118e-05	121	89	5.0977e-25	4.74086e-23	Cluster1	5.73186e-23			19	FERMENTATION.PWY..mixed.acid.fermentation	Shedder_or_control	Shedder	1.43818e-05	1.82365e-05	121	29	0.437137	0.919024	0.990404			COLANSYN.PWY..colanic.acid.building.blocks.biosynthesis	DSC_all	not_DSC	2.60442e-05	2.38611e-05	35	13	0.284949	0.806726
	11	PWY.724..superpathway.of.L.lysine..L.threonine.and.L.methionine.biosynthesis.II	Cluster	Cluster2	-0.000678615	4.80436e-05	121	87	2.06145e-24	1.74286e-22	Cluster1	2.22875e-22			20	GLCMANNANAUT.PWY..superpathway.of.N.acetylglucosamine..N.acetylmannosamine.and.N.acetylneuraminate.degradation	Shedder_or_control	Shedder	-0.000121814	0.000125612	121	72	0.340148	0.919024	0.990404			COMPLETE.ARO.PWY..superpathway.of.aromatic.amino.acid.biosynthesis	DSC_all	not_DSC	0.000110416	7.5753e-05	35	19	0.157072	0.806726
	12	PWY.2941..L.lysine.biosynthesis.II	Cluster	Cluster5	-0.000592894	4.61261e-05	121	76	1.89649e-23	1.46978e-21	Cluster1	1.83829e-21			23	GLUTORN.PWY..L.ornithine.biosynthesis.I	Shedder_or_control	Shedder	1.77359e-05	1.14563e-05	121	24	0.133049	0.919024	0.990404			DTDPRHAMSYN.PWY..dTDP..beta..L.rhamnose.biosynthesis	DSC_all	not_DSC	0.000181571	0.000128066	35	25	0.167714	0.806726
	13	GLCMANNANAUT.PWY..superpathway.of.N.acetylglucosamine..N.acetylmannosamine.and.N.acetylneuraminate.degradation	Cluster	Cluster4	-0.000685376	5.44758e-05	121	72	2.73463e-23	1.95631e-21	Cluster1	2.56235e-21			25	GLYCOLYSIS.E.D..superpathway.of.glycolysis.and.the.Entner.Doudoroff.pathway	Shedder_or_control	Shedder	7.8853e-06	6.25181e-06	121	24	0.209695	0.919024	0.990404			GLUCOSE1PMETAB.PWY..glucose.and.glucose.1.phosphate.degradation	DSC_all	not_DSC	8.68264e-05	9.50104e-05	35	7	0.368951	0.806726
	14	PWY.7208..superpathway.of.pyrimidine.nucleobases.salvage	Cluster	Cluster3	0.0014444	0.000117043	121	80	8.78242e-23	5.83404e-21	Cluster1	7.96367e-21			27	GLYCOLYSIS..glycolysis.I..from.glucose.6.phosphate.	Shedder_or_control	Shedder	-7.77268e-05	0.000110414	121	84	0.487273	0.919024	0.990404			GLUTORN.PWY..L.ornithine.biosynthesis.I	DSC_all	not_DSC	-4.71406e-05	3.47939e-05	35	6	0.186782	0.806726
	15	P161.PWY..acetylene.degradation..anaerobic.	Cluster	Cluster3	0.00106306	8.16869e-05	121	75	3.89029e-22	2.41198e-20	Cluster1	3.03767e-20			29	HEME.BIOSYNTHESIS.II..heme.b.biosynthesis.I..aerobic.	Shedder_or_control	Shedder	1.26015e-05	1.12426e-05	121	33	0.271474	0.919024	0.990404			GLYCOGENSYNTH.PWY..glycogen.biosynthesis.I..from.ADP.D.Glucose.	DSC_all	not_DSC	0.000210156	0.000166494	35	23	0.217653	0.806726
	16	PWY0.1477..ethanolamine.utilization	Cluster	Cluster3	0.00106304	8.30281e-05	121	78	1.34944e-21	7.84361e-20	Cluster1	9.72633e-20			31	HEMESYN2.PWY..heme.b.biosynthesis.II..oxygen.independent.	Shedder_or_control	Shedder	1.76655e-05	1.40024e-05	121	32	0.217247	0.919024	0.990404			GLYCOLYSIS..glycolysis.I..from.glucose.6.phosphate.	DSC_all	not_DSC	-8.28008e-05	0.000107795	35	24	0.449443	0.806726
	17	PWY.6123..inosine.5..phosphate.biosynthesis.I	Cluster	Cluster4	0.00124726	9.26375e-05	121	82	3.03649e-21	1.66114e-19	Cluster1	2.1339e-19			33	HISTSYN.PWY..L.histidine.biosynthesis	Shedder_or_control	Shedder	1.89549e-05	1.1968e-05	121	14	0.124173	0.919024	0.990404			HISDEG.PWY..L.histidine.degradation.I	DSC_all	not_DSC	3.09231e-05	4.49334e-05	35	14	0.496137	0.806726
	18	PWY.5941..glycogen.degradation.II	Cluster	Cluster4	0.00179572	0.000134805	121	79	3.40307e-21	1.75825e-19	Cluster1	2.33318e-19			35	ILEUSYN.PWY..L.isoleucine.biosynthesis.I..from.threonine.	Shedder_or_control	Shedder	2.72913e-05	3.52126e-05	121	52	0.444531	0.919024	0.990404			HISTSYN.PWY..L.histidine.biosynthesis	DSC_all	not_DSC	-5.48838e-05	3.79046e-05	35	7	0.159077	0.806726
	19	PWY.724..superpathway.of.L.lysine..L.threonine.and.L.methionine.biosynthesis.II	Cluster	Cluster4	-0.000525554	4.00743e-05	121	87	3.65924e-21	1.7911e-19	Cluster1	2.44907e-19			38	NAGLIPASYN.PWY..lipid.IVA.biosynthesis..E..coli.	Shedder_or_control	Shedder	2.07558e-05	3.00663e-05	121	43	0.494829	0.919024	0.990404			HSERMETANA.PWY..L.methionine.biosynthesis.III	DSC_all	not_DSC	4.25705e-05	6.09835e-05	35	18	0.491222	0.806726
	20	PWY.5097..L.lysine.biosynthesis.VI	Cluster	Cluster4	-0.000545265	4.34484e-05	121	89	4.5252e-21	2.10422e-19	Cluster1	2.95822e-19			40	OANTIGEN.PWY..O.antigen.building.blocks.biosynthesis..E..coli.	Shedder_or_control	Shedder	0.000118965	0.000103112	121	70	0.258115	0.919024	0.990404			ILEUSYN.PWY..L.isoleucine.biosynthesis.I..from.threonine.	DSC_all	not_DSC	-5.2948e-05	5.90247e-05	35	16	0.377746	0.806726
	21	PWY.7238..sucrose.biosynthesis.II	Cluster	Cluster4	0.00217013	0.000167531	121	79	2.1237e-20	9.40496e-19	Cluster1	1.3266e-18			42	P161.PWY..acetylene.degradation..anaerobic.	Shedder_or_control	Shedder	-6.6806e-05	6.32546e-05	121	75	0.299648	0.919024	0.990404			NAGLIPASYN.PWY..lipid.IVA.biosynthesis..E..coli.	DSC_all	not_DSC	3.48827e-05	4.85508e-05	35	14	0.477519	0.806726
	22	PWY.2942..L.lysine.biosynthesis.III	Cluster	Cluster2	-0.0007429	6.42192e-05	121	92	5.50627e-20	2.32765e-18	Cluster1	3.22461e-18			43	P41.PWY..pyruvate.fermentation.to.acetate.and..S..lactate.I	Shedder_or_control	Shedder	-0.000268851	0.000254177	121	116	0.299272	0.919024	0.990404			NONMEVIPP.PWY..methylerythritol.phosphate.pathway.I	DSC_all	not_DSC	9.18226e-05	0.00011648	35	20	0.43759	0.806726
	23	PWY.6317..D.galactose.degradation.I..Leloir.pathway.	Cluster	Cluster2	-0.00059606	5.49565e-05	121	102	2.63823e-19	1.06676e-17	Cluster1	1.51348e-17			45	P441.PWY..superpathway.of.N.acetylneuraminate.degradation	Shedder_or_control	Shedder	5.01726e-06	7.75473e-06	121	25	0.522829	0.919024	0.990404			OANTIGEN.PWY..O.antigen.building.blocks.biosynthesis..E..coli.	DSC_all	not_DSC	0.000246727	0.000134096	35	25	0.0770118	0.806726
	24	PWY.7234..inosine.5..phosphate.biosynthesis.III	Cluster	Cluster4	0.00114257	9.04593e-05	121	78	6.45623e-19	2.50179e-17	Cluster1	3.55852e-17			47	PANTO.PWY..phosphopantothenate.biosynthesis.I	Shedder_or_control	Shedder	6.64581e-05	0.000107711	121	62	0.542016	0.919024	0.990404			P105.PWY..TCA.cycle.IV..2.oxoglutarate.decarboxylase.	DSC_all	not_DSC	9.02734e-06	7.90202e-06	35	4	0.265278	0.806726
	25	PWY.6124..inosine.5..phosphate.biosynthesis.II	Cluster	Cluster4	0.00108407	8.89392e-05	121	81	1.17613e-18	4.37521e-17	Cluster1	6.23793e-17			49	PEPTIDOGLYCANSYN.PWY..peptidoglycan.biosynthesis.I..meso.diaminopimelate.containing.	Shedder_or_control	Shedder	-0.000190698	0.000170493	121	117	0.273911	0.919024	0.990404			P161.PWY..acetylene.degradation..anaerobic.	DSC_all	not_DSC	7.65773e-05	5.35833e-05	35	19	0.164635	0.806726
	26	GLCMANNANAUT.PWY..superpathway.of.N.acetylglucosamine..N.acetylmannosamine.and.N.acetylneuraminate.degradation	Cluster	Cluster5	-0.000675145	6.39857e-05	121	72	1.35236e-18	4.83728e-17	Cluster1	7.03977e-17			50	PHOSLIPSYN.PWY..superpathway.of.phospholipid.biosynthesis.I..bacteria.	Shedder_or_control	Shedder	-1.43845e-05	2.37035e-05	121	42	0.54845	0.919024	0.990404			P164.PWY..purine.nucleobases.degradation.I..anaerobic.	DSC_all	not_DSC	-4.81489e-05	3.44613e-05	35	14	0.173886	0.806726
	27	PWY.6122..5.aminoimidazole.ribonucleotide.biosynthesis.II	Cluster	Cluster4	0.0012573	0.000106314	121	82	3.06745e-18	1.01883e-16	Cluster1	1.51274e-16			52	POLYAMINSYN3.PWY..superpathway.of.polyamine.biosynthesis.II	Shedder_or_control	Shedder	-2.65642e-06	1.83421e-06	121	14	0.156841	0.919024	0.990404			P41.PWY..pyruvate.fermentation.to.acetate.and..S..lactate.I	DSC_all	not_DSC	0.000176142	0.000252113	35	32	0.491183	0.806726
	28	PWY.6277..superpathway.of.5.aminoimidazole.ribonucleotide.biosynthesis	Cluster	Cluster4	0.0012573	0.000106314	121	82	3.06745e-18	1.01883e-16	Cluster1	1.51274e-16			54	POLYISOPRENSYN.PWY..polyisoprenoid.biosynthesis..E..coli.	Shedder_or_control	Shedder	1.4695e-05	1.83595e-05	121	31	0.43027	0.919024	0.990404			PANTO.PWY..phosphopantothenate.biosynthesis.I	DSC_all	not_DSC	0.000220201	0.00015292	35	20	0.161323	0.806726
	29	PWY.7790..UMP.biosynthesis.II	Cluster	Cluster2	0.00141453	0.000133816	121	116	3.84571e-18	1.23328e-16	Cluster1	1.86384e-16			58	PWY.241..C4.photosynthetic.carbon.assimilation.cycle..NADP.ME.type	Shedder_or_control	Shedder	-3.42383e-05	3.05977e-05	121	49	0.271884	0.919024	0.990404			PANTOSYN.PWY..superpathway.of.coenzyme.A.biosynthesis.I..bacteria.	DSC_all	not_DSC	7.65008e-05	9.53301e-05	35	19	0.4295	0.806726
	30	PWY.7791..UMP.biosynthesis.III	Cluster	Cluster2	0.00141267	0.000133845	121	116	4.26719e-18	1.30879e-16	Cluster1	1.99918e-16			60	PWY.2941..L.lysine.biosynthesis.II	Shedder_or_control	Shedder	-0.000140314	9.87431e-05	121	76	0.166063	0.919024	0.990404			PENTOSE.P.PWY..pentose.phosphate.pathway	DSC_all	not_DSC	5.62392e-05	5.20012e-05	35	18	0.289589	0.806726
	31	UDPNAGSYN.PWY..UDP.N.acetyl.D.glucosamine.biosynthesis.I	Cluster	Cluster2	0.00135036	0.000126432	121	118	4.36264e-18	1.30879e-16	Cluster1	2.01039e-16			62	PWY.2942..L.lysine.biosynthesis.III	Shedder_or_control	Shedder	-9.73679e-05	9.28207e-05	121	92	0.303118	0.919024	0.990404			PEPTIDOGLYCANSYN.PWY..peptidoglycan.biosynthesis.I..meso.diaminopimelate.containing.	DSC_all	not_DSC	0.000205434	0.000156993	35	33	0.202858	0.806726
	32	PWY.6317..D.galactose.degradation.I..Leloir.pathway.	Cluster	Cluster5	-0.000577093	5.75514e-05	121	102	2.20424e-17	6.40608e-16	Cluster1	9.83512e-16			63	PWY.3841..folate.transformations.II..plants.	Shedder_or_control	Shedder	-0.00010408	0.000107139	121	107	0.340226	0.919024	0.990404			PHOSLIPSYN.PWY..superpathway.of.phospholipid.biosynthesis.I..bacteria.	DSC_all	not_DSC	2.06166e-05	2.02664e-05	35	11	0.318357	0.806726
	33	GLCMANNANAUT.PWY..superpathway.of.N.acetylglucosamine..N.acetylmannosamine.and.N.acetylneuraminate.degradation	Cluster	Cluster2	-0.000623976	6.29014e-05	121	72	3.96935e-17	1.11863e-15	Cluster1	1.74341e-15			65	PWY.4041...gamma..glutamyl.cycle	Shedder_or_control	Shedder	2.78407e-05	1.63242e-05	121	48	0.0992646	0.919024	0.990404			PPGPPMET.PWY..ppGpp.metabolism	DSC_all	not_DSC	6.69697e-06	6.01802e-06	35	7	0.266594	0.806726
	34	PWY.6121..5.aminoimidazole.ribonucleotide.biosynthesis.I	Cluster	Cluster4	0.00111581	0.000101466	121	77	4.41785e-17	1.20841e-15	Cluster1	1.91055e-15			67	PWY.4984..urea.cycle	Shedder_or_control	Shedder	-4.06036e-06	3.0077e-06	121	21	0.17702	0.919024	0.990404			PWY.1269..CMP.3.deoxy.D.manno.octulosonate.biosynthesis	DSC_all	not_DSC	3.09367e-05	1.75956e-05	35	13	0.0905833	0.806726
	35	P41.PWY..pyruvate.fermentation.to.acetate.and..S..lactate.I	Cluster	Cluster2	0.00123414	0.000120126	121	116	7.19812e-17	1.87471e-15	Cluster1	3.04467e-15			69	PWY.5097..L.lysine.biosynthesis.VI	Shedder_or_control	Shedder	-0.000108484	9.01666e-05	121	89	0.238814	0.919024	0.990404			PWY.241..C4.photosynthetic.carbon.assimilation.cycle..NADP.ME.type	DSC_all	not_DSC	1.12629e-05	1.5004e-05	35	16	0.459757	0.806726
	36	PWY.5100..pyruvate.fermentation.to.acetate.and.lactate.II	Cluster	Cluster2	0.00123386	0.000120166	121	117	7.25694e-17	1.87471e-15	Cluster1	3.04467e-15			70	PWY.5100..pyruvate.fermentation.to.acetate.and.lactate.II	Shedder_or_control	Shedder	-0.000265627	0.000253572	121	117	0.30385	0.919024	0.990404			PWY.2941..L.lysine.biosynthesis.II	DSC_all	not_DSC	0.000113442	8.6952e-05	35	22	0.201035	0.806726
	37	PWY.5384..sucrose.degradation.IV..sucrose.phosphorylase.	Cluster	Cluster3	0.00176054	0.000181425	121	58	1.76204e-16	4.42892e-15	Cluster1	7.07587e-15			71	PWY.5103..L.isoleucine.biosynthesis.III	Shedder_or_control	Shedder	2.53351e-05	3.22029e-05	121	52	0.437794	0.919024	0.990404			PWY.3001..superpathway.of.L.isoleucine.biosynthesis.I	DSC_all	not_DSC	-4.04742e-05	5.64365e-05	35	13	0.479529	0.806726
	38	THRESYN.PWY..superpathway.of.L.threonine.biosynthesis	Cluster	Cluster2	-0.000663291	6.88304e-05	121	99	1.81534e-16	4.44281e-15	Cluster1	7.18722e-15			74	PWY.5130..2.oxobutanoate.degradation.I	Shedder_or_control	Shedder	-7.71615e-06	6.2644e-06	121	24	0.226528	0.919024	0.990404			PWY.3841..folate.transformations.II..plants.	DSC_all	not_DSC	0.000236601	0.000122239	35	33	0.0640753	0.806726
	39	NONMEVIPP.PWY..methylerythritol.phosphate.pathway.I	Cluster	Cluster5	0.000671976	6.78959e-05	121	60	1.98765e-16	4.73978e-15	Cluster1	7.76012e-15			76	PWY.5188..tetrapyrrole.biosynthesis.I..from.glutamate.	Shedder_or_control	Shedder	2.24035e-05	2.79164e-05	121	48	0.428657	0.919024	0.990404			PWY.4041...gamma..glutamyl.cycle	DSC_all	not_DSC	-3.85455e-05	4.50909e-05	35	17	0.400199	0.806726
	40	P161.PWY..acetylene.degradation..anaerobic.	Cluster	Cluster4	-0.000291267	2.66364e-05	121	75	2.12199e-16	4.93362e-15	Cluster1	8.1711e-15			78	PWY.5189..tetrapyrrole.biosynthesis.II..from.glycine.	Shedder_or_control	Shedder	1.37347e-05	2.24565e-05	121	45	0.545475	0.919024	0.990404			PWY.5005..biotin.biosynthesis.II	DSC_all	not_DSC	4.35574e-06	5.31517e-06	35	7	0.412687	0.806726
	41	PWY.6163..chorismate.biosynthesis.from.3.dehydroquinate	Cluster	Cluster5	0.000936488	9.54201e-05	121	65	3.12594e-16	6.92173e-15	Cluster1	1.15619e-14			81	PWY.5367..petroselinate.biosynthesis	Shedder_or_control	Shedder	-4.46382e-05	4.77128e-05	121	44	0.35714	0.919024	0.990404			PWY.5030..L.histidine.degradation.III	DSC_all	not_DSC	3.07866e-05	2.0303e-05	35	12	0.141484	0.806726
	42	PWY66.429..fatty.acid.biosynthesis.initiation..mitochondria.	Cluster	Cluster4	-0.000647096	6.78388e-05	121	81	3.10981e-16	6.92173e-15	Cluster1	1.15619e-14			88	PWY.5695..inosine.5..phosphate.degradation	Shedder_or_control	Shedder	6.38493e-05	8.77778e-05	121	63	0.472507	0.919024	0.990404			PWY.5100..pyruvate.fermentation.to.acetate.and.lactate.II	DSC_all	not_DSC	0.000180103	0.000251877	35	33	0.481164	0.806726
	43	PWY0.1477..ethanolamine.utilization	Cluster	Cluster4	-0.000290353	2.70621e-05	121	78	6.73898e-16	1.4575e-14	Cluster1	2.42862e-14			90	PWY.5913..partial.TCA.cycle..obligate.autotrophs.	Shedder_or_control	Shedder	2.13581e-05	2.40683e-05	121	28	0.382435	0.919024	0.990404			PWY.5103..L.isoleucine.biosynthesis.III	DSC_all	not_DSC	-5.52068e-05	5.32134e-05	35	16	0.308906	0.806726
	44	PWY.5686..UMP.biosynthesis.I	Cluster	Cluster2	0.00144789	0.000145428	121	116	1.02614e-15	2.1689e-14	Cluster1	3.5611e-14			92	PWY.5918..superpathway.of.heme.b.biosynthesis.from.glutamate	Shedder_or_control	Shedder	1.1596e-05	1.6326e-05	121	29	0.483104	0.919024	0.990404			PWY.5121..superpathway.of.geranylgeranyl.diphosphate.biosynthesis.II..via.MEP.	DSC_all	not_DSC	-2.12218e-05	2.40813e-05	35	6	0.386428	0.806726
	45	PANTO.PWY..phosphopantothenate.biosynthesis.I	Cluster	Cluster5	0.000807616	8.11399e-05	121	62	1.66143e-15	3.43363e-14	Cluster1	5.62686e-14			95	PWY.5973..cis.vaccenate.biosynthesis	Shedder_or_control	Shedder	-4.38633e-05	5.3952e-05	121	71	0.422723	0.919024	0.990404			PWY.5265..peptidoglycan.biosynthesis.II..staphylococci.	DSC_all	not_DSC	0.000104983	0.000115507	35	17	0.37157	0.806726
	46	PWY.6385..peptidoglycan.biosynthesis.III..mycobacteria.	Cluster	Cluster4	0.000802263	8.23086e-05	121	73	2.683e-15	5.42433e-14	Cluster1	8.37992e-14			97	PWY.5989..stearate.biosynthesis.II..bacteria.and.plants.	Shedder_or_control	Shedder	1.04643e-05	1.02971e-05	121	35	0.319513	0.919024	0.990404			PWY.5367..petroselinate.biosynthesis	DSC_all	not_DSC	-5.31202e-05	3.86847e-05	35	17	0.178963	0.806726
	47	DTDPRHAMSYN.PWY..dTDP..beta..L.rhamnose.biosynthesis	Cluster	Cluster5	0.000668326	7.1279e-05	121	71	3.75029e-15	7.42079e-14	Cluster1	1.15847e-13			100	PWY.6125..superpathway.of.guanosine.nucleotides.de.novo.biosynthesis.II	Shedder_or_control	Shedder	2.90942e-05	3.77641e-05	121	70	0.447262	0.919024	0.990404			PWY.5659..GDP.mannose.biosynthesis	DSC_all	not_DSC	1.9279e-05	2.32823e-05	35	14	0.415256	0.806726
	48	PWY.724..superpathway.of.L.lysine..L.threonine.and.L.methionine.biosynthesis.II	Cluster	Cluster5	-0.000457025	4.96693e-05	121	87	7.18751e-15	1.39258e-13	Cluster1	2.14937e-13			102	PWY.6126..superpathway.of.adenosine.nucleotides.de.novo.biosynthesis.II	Shedder_or_control	Shedder	3.58959e-05	5.04156e-05	121	75	0.482213	0.919024	0.990404			PWY.5676..acetyl.CoA.fermentation.to.butanoate.II	DSC_all	not_DSC	5.0816e-06	5.34173e-06	35	4	0.341734	0.806726
	49	OANTIGEN.PWY..O.antigen.building.blocks.biosynthesis..E..coli.	Cluster	Cluster5	0.000743532	8.16288e-05	121	70	1.12591e-14	2.09419e-13	Cluster1	3.2968e-13			105	PWY.6151..S.adenosyl.L.methionine.salvage.I	Shedder_or_control	Shedder	-9.82244e-05	0.000157893	121	107	0.539114	0.919024	0.990404			PWY.5686..UMP.biosynthesis.I	DSC_all	not_DSC	0.000221189	0.000288605	35	33	0.450954	0.806726
	50	PWY.5265..peptidoglycan.biosynthesis.II..staphylococci.	Cluster	Cluster4	0.000494582	5.33551e-05	121	59	1.11661e-14	2.09419e-13	Cluster1	3.2968e-13			107	PWY.621..sucrose.degradation.III..sucrose.invertase.	Shedder_or_control	Shedder	3.14896e-05	1.51389e-05	121	32	0.0464295	0.919024	0.990404			PWY.5910..superpathway.of.geranylgeranyldiphosphate.biosynthesis.I..via.mevalonate.	DSC_all	not_DSC	-5.29203e-06	4.05635e-06	35	4	0.192835	0.806726
	51	PWY.6163..chorismate.biosynthesis.from.3.dehydroquinate	Cluster	Cluster4	0.000731149	7.73293e-05	121	65	1.85808e-14	3.38827e-13	Cluster1	5.22308e-13			109	PWY.6282..palmitoleate.biosynthesis.I..from..5Z..dodec.5.enoate.	Shedder_or_control	Shedder	8.39229e-06	7.59211e-06	121	16	0.280533	0.919024	0.990404			PWY.5941..glycogen.degradation.II	DSC_all	not_DSC	0.000226336	0.000281472	35	25	0.428652	0.806726
	52	ARO.PWY..chorismate.biosynthesis.I	Cluster	Cluster5	0.000865404	9.61043e-05	121	64	2.53032e-14	4.48617e-13	Cluster1	7.04232e-13			111	PWY.6305..superpathway.of.putrescine.biosynthesis	Shedder_or_control	Shedder	9.09122e-06	7.02257e-06	121	33	0.208316	0.919024	0.990404			PWY.5989..stearate.biosynthesis.II..bacteria.and.plants.	DSC_all	not_DSC	-1.36411e-05	1.63917e-05	35	13	0.413017	0.806726
	53	PWY.6123..inosine.5..phosphate.biosynthesis.I	Cluster	Cluster5	0.0010364	0.000115164	121	82	2.55664e-14	4.48617e-13	Cluster1	7.04579e-13			113	PWY.6317..D.galactose.degradation.I..Leloir.pathway.	Shedder_or_control	Shedder	-0.000109355	0.000106798	121	102	0.314505	0.919024	0.990404			PWY.6121..5.aminoimidazole.ribonucleotide.biosynthesis.I	DSC_all	not_DSC	0.000212074	0.00019497	35	27	0.286646	0.806726
	54	PWY.8187..L.arginine.degradation.XIII..reductive.Stickland.reaction.	Cluster	Cluster5	0.000531667	5.98691e-05	121	69	3.06834e-14	5.28436e-13	Cluster1	8.37387e-13			115	PWY.6386..UDP.N.acetylmuramoyl.pentapeptide.biosynthesis.II..lysine.containing.	Shedder_or_control	Shedder	-0.000201901	0.000173084	121	117	0.25443	0.919024	0.990404			PWY.6122..5.aminoimidazole.ribonucleotide.biosynthesis.II	DSC_all	not_DSC	0.000191884	0.000216039	35	28	0.382522	0.806726
	55	P161.PWY..acetylene.degradation..anaerobic.	Cluster	Cluster5	-0.000295814	3.35244e-05	121	75	1.02591e-13	1.72522e-12	Cluster1	2.62166e-12			117	PWY.6387..UDP.N.acetylmuramoyl.pentapeptide.biosynthesis.I..meso.diaminopimelate.containing.	Shedder_or_control	Shedder	-0.000203732	0.000167447	121	118	0.235046	0.919024	0.990404			PWY.6123..inosine.5..phosphate.biosynthesis.I	DSC_all	not_DSC	0.000249286	0.000207868	35	28	0.241241	0.806726
	56	PWY.6386..UDP.N.acetylmuramoyl.pentapeptide.biosynthesis.II..lysine.containing.	Cluster	Cluster2	0.00101789	0.00011889	121	117	1.03884e-13	1.72522e-12	Cluster1	2.63079e-12			120	PWY.6608..guanosine.nucleotides.degradation.III	Shedder_or_control	Shedder	4.78723e-05	3.21579e-05	121	52	0.146638	0.919024	0.990404			PWY.6124..inosine.5..phosphate.biosynthesis.II	DSC_all	not_DSC	0.000235486	0.00018291	35	27	0.209303	0.806726
	57	ARO.PWY..chorismate.biosynthesis.I	Cluster	Cluster4	0.00070514	7.73211e-05	121	64	1.45539e-13	2.33364e-12	Cluster1	3.52681e-12			122	PWY.6609..adenine.and.adenosine.salvage.III	Shedder_or_control	Shedder	0.0001266	0.000107182	121	65	0.24667	0.919024	0.990404			PWY.6125..superpathway.of.guanosine.nucleotides.de.novo.biosynthesis.II	DSC_all	not_DSC	3.51137e-05	4.28008e-05	35	22	0.419362	0.806726
	58	PWY.2942..L.lysine.biosynthesis.III	Cluster	Cluster4	-0.000474857	5.39684e-05	121	92	1.44068e-13	2.33364e-12	Cluster1	3.52152e-12			124	PWY.6628..superpathway.of.L.phenylalanine.biosynthesis	Shedder_or_control	Shedder	-4.23032e-05	4.58043e-05	121	46	0.36336	0.919024	0.990404			PWY.6126..superpathway.of.adenosine.nucleotides.de.novo.biosynthesis.II	DSC_all	not_DSC	6.39477e-05	6.22885e-05	35	23	0.313928	0.806726
	59	PWY.6122..5.aminoimidazole.ribonucleotide.biosynthesis.II	Cluster	Cluster5	0.00114174	0.000132585	121	82	1.9843e-13	3.07567e-12	Cluster1	4.68729e-12			125	PWY.6630..superpathway.of.L.tyrosine.biosynthesis	Shedder_or_control	Shedder	-2.64826e-05	4.33496e-05	121	47	0.545992	0.919024	0.990404			PWY.6151..S.adenosyl.L.methionine.salvage.I	DSC_all	not_DSC	0.000193746	0.000183339	35	30	0.300954	0.806726
	60	PWY.6277..superpathway.of.5.aminoimidazole.ribonucleotide.biosynthesis	Cluster	Cluster5	0.00114174	0.000132585	121	82	1.9843e-13	3.07567e-12	Cluster1	4.68729e-12			130	PWY.6859..all.trans.farnesol.biosynthesis	Shedder_or_control	Shedder	7.61364e-06	1.15396e-05	121	17	0.514535	0.919024	0.990404			PWY.6163..chorismate.biosynthesis.from.3.dehydroquinate	DSC_all	not_DSC	0.000220989	0.000155015	35	20	0.165869	0.806726
	61	GLYCOGENSYNTH.PWY..glycogen.biosynthesis.I..from.ADP.D.Glucose.	Cluster	Cluster5	0.000879788	0.000101349	121	68	2.04927e-13	3.1243e-12	Cluster1	4.7963e-12			131	PWY.6897..thiamine.diphosphate.salvage.II	Shedder_or_control	Shedder	-3.01291e-05	4.96233e-05	121	50	0.54828	0.919024	0.990404			PWY.622..starch.biosynthesis	DSC_all	not_DSC	-5.39275e-05	4.18728e-05	35	5	0.208767	0.806726
	62	PEPTIDOGLYCANSYN.PWY..peptidoglycan.biosynthesis.I..meso.diaminopimelate.containing.	Cluster	Cluster2	0.000989025	0.000117662	121	117	2.25745e-13	3.38617e-12	Cluster1	5.20138e-12			134	PWY.6902..chitin.degradation.II..Vibrio.	Shedder_or_control	Shedder	8.59602e-06	4.7235e-06	121	16	0.0713181	0.919024	0.990404			PWY.6277..superpathway.of.5.aminoimidazole.ribonucleotide.biosynthesis	DSC_all	not_DSC	0.000191884	0.000216039	35	28	0.382522	0.806726
	63	PWY.7238..sucrose.biosynthesis.II	Cluster	Cluster5	0.0017681	0.000207939	121	79	2.79871e-13	4.13143e-12	Cluster1	6.29373e-12			136	PWY.702..L.methionine.biosynthesis.II	Shedder_or_control	Shedder	2.37381e-05	2.94183e-05	121	16	0.426224	0.919024	0.990404			PWY.6305..superpathway.of.putrescine.biosynthesis	DSC_all	not_DSC	2.5654e-06	2.95349e-06	35	9	0.427312	0.806726
	64	PWY.5097..L.lysine.biosynthesis.VI	Cluster	Cluster5	-0.000445032	5.32335e-05	121	89	3.01295e-13	4.37819e-12	Cluster1	6.72174e-12			137	PWY.7111..pyruvate.fermentation.to.isobutanol..engineered.	Shedder_or_control	Shedder	2.9901e-05	3.10217e-05	121	52	0.34314	0.919024	0.990404			PWY.6317..D.galactose.degradation.I..Leloir.pathway.	DSC_all	not_DSC	0.000141606	0.000100379	35	31	0.167686	0.806726
	65	PWY0.1477..ethanolamine.utilization	Cluster	Cluster5	-0.000292574	3.40748e-05	121	78	3.53494e-13	5.05769e-12	Cluster1	7.8242e-12			138	PWY.7115..C4.photosynthetic.carbon.assimilation.cycle..NAD.ME.type	Shedder_or_control	Shedder	5.52217e-06	7.42338e-06	121	42	0.463372	0.919024	0.990404			PWY.6386..UDP.N.acetylmuramoyl.pentapeptide.biosynthesis.II..lysine.containing.	DSC_all	not_DSC	0.000194967	0.000155343	35	33	0.221298	0.806726
	66	PWY.6121..5.aminoimidazole.ribonucleotide.biosynthesis.I	Cluster	Cluster5	0.0010544	0.000125758	121	77	4.69223e-13	6.61178e-12	Cluster1	1.03046e-11			141	PWY.7184..pyrimidine.deoxyribonucleotides.de.novo.biosynthesis.I	Shedder_or_control	Shedder	1.36572e-05	1.68949e-05	121	21	0.425485	0.919024	0.990404			PWY.6387..UDP.N.acetylmuramoyl.pentapeptide.biosynthesis.I..meso.diaminopimelate.containing.	DSC_all	not_DSC	0.000205308	0.000160345	35	34	0.212324	0.806726
	67	PWY.6387..UDP.N.acetylmuramoyl.pentapeptide.biosynthesis.I..meso.diaminopimelate.containing.	Cluster	Cluster2	0.000989663	0.000121158	121	118	7.00898e-13	9.72889e-12	Cluster1	1.52731e-11			144	PWY.7198..pyrimidine.deoxyribonucleotides.de.novo.biosynthesis.IV	Shedder_or_control	Shedder	2.5686e-05	3.39595e-05	121	69	0.455641	0.919024	0.990404			PWY.6507..4.deoxy.L.threo.hex.4.enopyranuronate.degradation	DSC_all	not_DSC	-4.22352e-06	6.19036e-06	35	4	0.495674	0.806726
	68	P161.PWY..acetylene.degradation..anaerobic.	Cluster	Cluster2	-0.000275098	3.222e-05	121	75	9.35821e-13	1.27987e-11	Cluster1	2.00415e-11			145	PWY.7199..pyrimidine.deoxyribonucleosides.salvage	Shedder_or_control	Shedder	7.44207e-05	0.000105638	121	79	0.486644	0.919024	0.990404			PWY.6527..stachyose.degradation	DSC_all	not_DSC	9.93999e-05	8.22964e-05	35	22	0.237553	0.806726
	69	PWY66.429..fatty.acid.biosynthesis.initiation..mitochondria.	Cluster	Cluster5	-0.000633867	7.89933e-05	121	81	1.13396e-12	1.52838e-11	Cluster1	2.3438e-11			149	PWY.7220..adenosine.deoxyribonucleotides.de.novo.biosynthesis.II	Shedder_or_control	Shedder	1.94092e-05	2.63583e-05	121	75	0.46741	0.919024	0.990404			PWY.6608..guanosine.nucleotides.degradation.III	DSC_all	not_DSC	-5.51645e-05	5.82987e-05	35	20	0.352425	0.806726
	70	PWY66.429..fatty.acid.biosynthesis.initiation..mitochondria.	Cluster	Cluster2	-0.000621146	7.77867e-05	121	81	1.32919e-12	1.75677e-11	Cluster1	2.72727e-11			152	PWY.7222..guanosine.deoxyribonucleotides.de.novo.biosynthesis.II	Shedder_or_control	Shedder	1.94092e-05	2.63583e-05	121	75	0.46741	0.919024	0.990404			PWY.6609..adenine.and.adenosine.salvage.III	DSC_all	not_DSC	-0.000261931	0.000257197	35	21	0.317491	0.806726
	71	TRNA.CHARGING.PWY..tRNA.charging	Cluster	Cluster2	0.00122183	0.000153482	121	115	1.34119e-12	1.75677e-11	Cluster1	2.73194e-11			154	PWY.7228..superpathway.of.guanosine.nucleotides.de.novo.biosynthesis.I	Shedder_or_control	Shedder	3.30262e-05	4.34653e-05	121	75	0.45351	0.919024	0.990404			PWY.6628..superpathway.of.L.phenylalanine.biosynthesis	DSC_all	not_DSC	4.04252e-05	3.69013e-05	35	13	0.283358	0.806726
	72	PWY.6124..inosine.5..phosphate.biosynthesis.II	Cluster	Cluster5	0.000909288	0.000111566	121	81	2.14456e-12	2.77005e-11	Cluster1	4.30596e-11			156	PWY.7229..superpathway.of.adenosine.nucleotides.de.novo.biosynthesis.I	Shedder_or_control	Shedder	5.16663e-05	7.31201e-05	121	75	0.485563	0.919024	0.990404			PWY.6630..superpathway.of.L.tyrosine.biosynthesis	DSC_all	not_DSC	4.27713e-05	2.74278e-05	35	14	0.131285	0.806726
	73	COA.PWY.1..superpathway.of.coenzyme.A.biosynthesis.III..mammals.	Cluster	Cluster2	-0.00076029	9.4324e-05	121	108	2.291e-12	2.91868e-11	Cluster1	4.56739e-11			158	PWY.724..superpathway.of.L.lysine..L.threonine.and.L.methionine.biosynthesis.II	Shedder_or_control	Shedder	-0.000100536	8.71655e-05	121	87	0.258323	0.919024	0.990404			PWY.6700..queuosine.biosynthesis.I..de.novo.	DSC_all	not_DSC	8.46486e-05	9.79021e-05	35	20	0.395149	0.806726
	74	PWY0.1477..ethanolamine.utilization	Cluster	Cluster2	-0.000273834	3.27427e-05	121	78	2.37177e-12	2.98074e-11	Cluster1	4.69511e-11			160	PWY.7282..4.amino.2.methyl.5.diphosphomethylpyrimidine.biosynthesis.II	Shedder_or_control	Shedder	1.25876e-05	2.03355e-05	121	33	0.54028	0.919024	0.990404			PWY.6703..preQ0.biosynthesis	DSC_all	not_DSC	7.26364e-05	5.34651e-05	35	18	0.185599	0.806726
	75	PWY.7234..inosine.5..phosphate.biosynthesis.III	Cluster	Cluster5	0.000930865	0.000114035	121	78	2.67507e-12	3.31709e-11	Cluster1	5.22196e-11			162	PWY.7323..superpathway.of.GDP.mannose.derived.O.antigen.building.blocks.biosynthesis	Shedder_or_control	Shedder	-6.23931e-06	9.8833e-06	121	27	0.532299	0.919024	0.990404			PWY.6731..starch.degradation.III	DSC_all	not_DSC	4.79667e-06	6.36246e-06	35	4	0.451638	0.806726
	76	GLYCOGENSYNTH.PWY..glycogen.biosynthesis.I..from.ADP.D.Glucose.	Cluster	Cluster4	0.000657831	8.06005e-05	121	68	1.5436e-11	1.88888e-10	Cluster1	2.85465e-10			165	PWY.7345..superpathway.of.anaerobic.sucrose.degradation	Shedder_or_control	Shedder	4.82923e-05	1.84383e-05	121	23	0.00997262	0.919024	0.927454			PWY.6897..thiamine.diphosphate.salvage.II	DSC_all	not_DSC	4.8879e-05	3.77529e-05	35	16	0.206873	0.806726
	77	PANTO.PWY..phosphopantothenate.biosynthesis.I	Cluster	Cluster4	0.000528145	6.36845e-05	121	62	2.2285e-11	2.69157e-10	Cluster1	4.06774e-10			167	PWY.7357..thiamine.phosphate.formation.from.pyrithiamine.and.oxythiamine..yeast.	Shedder_or_control	Shedder	-4.859e-05	7.19517e-05	121	65	0.50469	0.919024	0.990404			PWY.6902..chitin.degradation.II..Vibrio.	DSC_all	not_DSC	1.50759e-05	1.56669e-05	35	5	0.342911	0.806726
	78	PWY.6385..peptidoglycan.biosynthesis.III..mycobacteria.	Cluster	Cluster5	0.000753885	0.000100824	121	73	2.73186e-11	3.25722e-10	Cluster1	4.95436e-10			170	PWY.7392..taxadiene.biosynthesis..engineered.	Shedder_or_control	Shedder	1.24863e-05	1.96925e-05	121	15	0.530947	0.919024	0.990404			PWY.7013...S..propane.1.2.diol.degradation	DSC_all	not_DSC	-2.36649e-06	3.07085e-06	35	5	0.47079	0.806726
	79	NONMEVIPP.PWY..methylerythritol.phosphate.pathway.I	Cluster	Cluster4	0.000423091	5.4967e-05	121	60	3.94374e-11	4.63877e-10	Cluster1	7.10632e-10			173	PWY.7663..gondoate.biosynthesis..anaerobic.	Shedder_or_control	Shedder	3.35803e-05	3.89559e-05	121	57	0.395719	0.919024	0.990404			PWY.702..L.methionine.biosynthesis.II	DSC_all	not_DSC	5.82457e-05	7.51605e-05	35	4	0.445042	0.806726
	80	PWY.2941..L.lysine.biosynthesis.II	Cluster	Cluster6	-0.000729425	9.54837e-05	121	76	3.99034e-11	4.63877e-10	Cluster1	7.14449e-10			174	PWY.7664..oleate.biosynthesis.IV..anaerobic.	Shedder_or_control	Shedder	9.04503e-06	8.06439e-06	121	16	0.273936	0.919024	0.990404			PWY.7111..pyruvate.fermentation.to.isobutanol..engineered.	DSC_all	not_DSC	-5.79464e-05	5.43295e-05	35	16	0.29582	0.806726
	81	PWY.5941..glycogen.degradation.II	Cluster	Cluster5	0.00124469	0.000167167	121	79	4.34054e-11	4.98358e-10	Cluster1	7.72232e-10			176	PWY.7790..UMP.biosynthesis.II	Shedder_or_control	Shedder	-0.00021366	0.000232244	121	116	0.365763	0.919024	0.990404			PWY.7115..C4.photosynthetic.carbon.assimilation.cycle..NAD.ME.type	DSC_all	not_DSC	-8.82814e-06	1.15716e-05	35	15	0.452703	0.806726
	82	PWY0.1586..peptidoglycan.maturation..meso.diaminopimelate.containing.	Cluster	Cluster4	0.000288176	3.98485e-05	121	69	1.36797e-10	1.55148e-09	Cluster1	2.31648e-09			178	PWY.7791..UMP.biosynthesis.III	Shedder_or_control	Shedder	-0.000212711	0.000231605	121	116	0.36657	0.919024	0.990404			PWY.7117..C4.photosynthetic.carbon.assimilation.cycle..PEPCK.type	DSC_all	not_DSC	1.81562e-05	2.19482e-05	35	15	0.416148	0.806726
	83	PWY.6317..D.galactose.degradation.I..Leloir.pathway.	Cluster	Cluster3	0.000980315	0.00014022	121	102	1.90643e-10	2.13612e-09	Cluster1	3.17099e-09			180	PWY.7851..coenzyme.A.biosynthesis.II..eukaryotic.	Shedder_or_control	Shedder	-0.000110761	0.000129247	121	117	0.39935	0.919024	0.990404			PWY.7184..pyrimidine.deoxyribonucleotides.de.novo.biosynthesis.I	DSC_all	not_DSC	3.35814e-05	2.91985e-05	35	7	0.260005	0.806726
	84	PWY.6270..isoprene.biosynthesis.I	Cluster	Cluster5	0.000404935	5.80107e-05	121	56	2.11935e-10	2.34642e-09	Cluster1	3.44364e-09			182	PWY.7977..L.methionine.biosynthesis.IV	Shedder_or_control	Shedder	6.41801e-06	7.62788e-06	121	19	0.407937	0.919024	0.990404			PWY.7197..pyrimidine.deoxyribonucleotide.phosphorylation	DSC_all	not_DSC	2.94301e-05	2.75626e-05	35	23	0.295215	0.806726
	85	COMPLETE.ARO.PWY..superpathway.of.aromatic.amino.acid.biosynthesis	Cluster	Cluster4	0.00039244	5.55954e-05	121	57	2.72571e-10	2.98225e-09	Cluster1	4.37827e-09			184	PWY.8004..Entner.Doudoroff.pathway.I	Shedder_or_control	Shedder	6.85515e-06	5.16356e-06	121	24	0.186872	0.919024	0.990404			PWY.7198..pyrimidine.deoxyribonucleotides.de.novo.biosynthesis.IV	DSC_all	not_DSC	3.11481e-05	4.32321e-05	35	21	0.477674	0.806726
	86	PWY.7560..methylerythritol.phosphate.pathway.II	Cluster	Cluster5	0.000388142	5.6282e-05	121	56	3.19528e-10	3.45536e-09	Cluster1	5.10337e-09			186	PWY.8073..lipid.IVA.biosynthesis..P..putida.	Shedder_or_control	Shedder	2.07558e-05	3.00663e-05	121	43	0.494829	0.919024	0.990404			PWY.7199..pyrimidine.deoxyribonucleosides.salvage	DSC_all	not_DSC	-0.000222934	0.00021341	35	24	0.305694	0.806726
	87	THRESYN.PWY..superpathway.of.L.threonine.biosynthesis	Cluster	Cluster4	-0.000380174	5.64976e-05	121	99	7.01058e-10	7.49407e-09	Cluster1	1.10712e-08			188	PWY.841..superpathway.of.purine.nucleotides.de.novo.biosynthesis.I	Shedder_or_control	Shedder	4.39004e-05	5.88238e-05	121	57	0.46144	0.919024	0.990404			PWY.7208..superpathway.of.pyrimidine.nucleobases.salvage	DSC_all	not_DSC	9.33455e-05	5.34719e-05	35	25	0.0924221	0.806726
	88	OANTIGEN.PWY..O.antigen.building.blocks.biosynthesis..E..coli.	Cluster	Cluster4	0.000456752	6.60026e-05	121	70	1.2985e-09	1.37228e-08	Cluster1	1.97301e-08			191	PWY.I9..L.cysteine.biosynthesis.VI..from.L.methionine.	Shedder_or_control	Shedder	4.57749e-05	3.3841e-05	121	17	0.186513	0.919024	0.990404			PWY.7210..pyrimidine.deoxyribonucleotides.biosynthesis.from.CTP	DSC_all	not_DSC	2.59717e-05	3.17925e-05	35	5	0.419837	0.806726
	89	PWY.6700..queuosine.biosynthesis.I..de.novo.	Cluster	Cluster5	0.000449573	6.84387e-05	121	59	1.65233e-09	1.72659e-08	Cluster1	2.49714e-08			192	PWY0.1061..superpathway.of.L.alanine.biosynthesis	Shedder_or_control	Shedder	0.000173715	8.21982e-05	121	67	0.0432854	0.919024	0.990404			PWY.7220..adenosine.deoxyribonucleotides.de.novo.biosynthesis.II	DSC_all	not_DSC	3.36209e-05	3.15127e-05	35	23	0.295576	0.806726
	90	DTDPRHAMSYN.PWY..dTDP..beta..L.rhamnose.biosynthesis	Cluster	Cluster4	0.00039402	5.72971e-05	121	71	1.79312e-09	1.85289e-08	Cluster1	2.68831e-08			195	PWY0.1477..ethanolamine.utilization	Shedder_or_control	Shedder	-5.85456e-05	6.33449e-05	121	78	0.363066	0.919024	0.990404			PWY.7222..guanosine.deoxyribonucleotides.de.novo.biosynthesis.II	DSC_all	not_DSC	3.36209e-05	3.15127e-05	35	23	0.295576	0.806726
	91	PWY.6151..S.adenosyl.L.methionine.salvage.I	Cluster	Cluster2	-0.000718258	0.000105221	121	107	1.9987e-09	2.04263e-08	Cluster1	2.96721e-08			197	PWY0.1586..peptidoglycan.maturation..meso.diaminopimelate.containing.	Shedder_or_control	Shedder	5.6982e-05	6.18821e-05	121	69	0.364691	0.919024	0.990404			PWY.7228..superpathway.of.guanosine.nucleotides.de.novo.biosynthesis.I	DSC_all	not_DSC	5.43335e-05	5.25752e-05	35	23	0.310773	0.806726
	92	COMPLETE.ARO.PWY..superpathway.of.aromatic.amino.acid.biosynthesis	Cluster	Cluster5	0.00043757	6.71808e-05	121	57	2.28552e-09	2.31036e-08	Cluster1	3.34614e-08			198	PWY0.162..superpathway.of.pyrimidine.ribonucleotides.de.novo.biosynthesis	Shedder_or_control	Shedder	8.73676e-05	8.12936e-05	121	62	0.291445	0.919024	0.990404			PWY.7229..superpathway.of.adenosine.nucleotides.de.novo.biosynthesis.I	DSC_all	not_DSC	9.3784e-05	9.18059e-05	35	23	0.316349	0.806726
	93	P124.PWY..Bifidobacterium.shunt	Cluster	Cluster4	0.000473937	7.30638e-05	121	58	2.54864e-09	2.54864e-08	Cluster1	3.71204e-08			200	PWY0.301..L.ascorbate.degradation.I..bacterial..anaerobic.	Shedder_or_control	Shedder	2.33755e-05	1.84115e-05	121	28	0.214171	0.919024	0.990404			PWY.7234..inosine.5..phosphate.biosynthesis.III	DSC_all	not_DSC	0.000252308	0.000196854	35	25	0.211297	0.806726
	94	PWY.6317..D.galactose.degradation.I..Leloir.pathway.	Cluster	Cluster6	-0.000746633	0.000116321	121	102	3.18907e-09	3.15514e-08	Cluster1	4.62086e-08			202	PWY0.862...5Z..dodecenoate.biosynthesis.I	Shedder_or_control	Shedder	1.5175e-05	1.123e-05	121	19	0.188889	0.919024	0.990404			PWY.7238..sucrose.biosynthesis.II	DSC_all	not_DSC	0.000362864	0.000348161	35	25	0.306907	0.806726
	95	PWY.6936..seleno.amino.acid.biosynthesis..plants.	Cluster	Cluster5	0.000235353	3.6205e-05	121	63	3.36647e-09	3.29559e-08	Cluster1	4.82813e-08			204	PWY4FS.7..phosphatidylglycerol.biosynthesis.I..plastidic.	Shedder_or_control	Shedder	-1.94124e-05	3.07097e-05	121	52	0.532115	0.919024	0.990404			PWY.7242..D.fructuronate.degradation	DSC_all	not_DSC	-5.48518e-06	7.67528e-06	35	4	0.479848	0.806726
	96	PWY.6936..seleno.amino.acid.biosynthesis..plants.	Cluster	Cluster4	0.000195647	2.92924e-05	121	63	3.40415e-09	3.29777e-08	Cluster1	4.8574e-08			206	PWY4FS.8..phosphatidylglycerol.biosynthesis.II..non.plastidic.	Shedder_or_control	Shedder	-1.9412e-05	3.07098e-05	121	52	0.532126	0.919024	0.990404			PWY.724..superpathway.of.L.lysine..L.threonine.and.L.methionine.biosynthesis.II	DSC_all	not_DSC	7.72198e-05	9.76913e-05	35	24	0.434911	0.806726
	97	PWY0.1061..superpathway.of.L.alanine.biosynthesis	Cluster	Cluster4	0.000427221	6.52106e-05	121	67	3.86012e-09	3.70094e-08	Cluster1	5.45267e-08			209	PWY66.399..gluconeogenesis.III	Shedder_or_control	Shedder	8.56531e-06	8.2048e-06	121	17	0.304901	0.919024	0.990404			PWY.7282..4.amino.2.methyl.5.diphosphomethylpyrimidine.biosynthesis.II	DSC_all	not_DSC	3.80564e-05	2.7396e-05	35	12	0.176217	0.806726
	98	PWY.3841..folate.transformations.II..plants.	Cluster	Cluster4	-0.000494651	7.39891e-05	121	107	4.28085e-09	4.06244e-08	Cluster1	5.9868e-08			211	PWY66.409..superpathway.of.purine.nucleotide.salvage	Shedder_or_control	Shedder	2.73048e-05	2.93119e-05	121	33	0.359111	0.919024	0.990404			PWY.7328..superpathway.of.UDP.glucose.derived.O.antigen.building.blocks.biosynthesis	DSC_all	not_DSC	2.02344e-05	2.87292e-05	35	14	0.486178	0.806726
	99	PWY.724..superpathway.of.L.lysine..L.threonine.and.L.methionine.biosynthesis.II	Cluster	Cluster6	-0.000656997	0.000100747	121	87	5.59764e-09	5.25839e-08	Cluster1	7.75122e-08			212	PWY66.429..fatty.acid.biosynthesis.initiation..mitochondria.	Shedder_or_control	Shedder	-0.000288602	0.000161161	121	81	0.0837226	0.919024	0.990404			PWY.7356..thiamine.diphosphate.salvage.IV..yeast.	DSC_all	not_DSC	-2.16212e-05	2.35226e-05	35	8	0.365851	0.806726
	100	PWY.2941..L.lysine.biosynthesis.II	Cluster	Cluster3	-0.000705431	0.00011217	121	76	6.8042e-09	6.32791e-08	Cluster1	9.37579e-08			217	THISYNARA.PWY..superpathway.of.thiamine.diphosphate.biosynthesis.III..eukaryotes.	Shedder_or_control	Shedder	-4.47061e-05	3.9943e-05	121	57	0.27207	0.919024	0.990404			PWY.7357..thiamine.phosphate.formation.from.pyrithiamine.and.oxythiamine..yeast.	DSC_all	not_DSC	0.000123403	9.24391e-05	35	19	0.193047	0.806726
	101	UNINTEGRATED	Cluster	Cluster4	-0.0229159	0.00364291	121	121	6.93679e-09	6.38734e-08	Cluster1	9.51187e-08			219	THRESYN.PWY..superpathway.of.L.threonine.biosynthesis	Shedder_or_control	Shedder	-6.36845e-05	8.75315e-05	121	99	0.473	0.919024	0.990404			PWY.7392..taxadiene.biosynthesis..engineered.	DSC_all	not_DSC	-1.54613e-05	2.06357e-05	35	5	0.460578	0.806726
	102	PWY.5695..inosine.5..phosphate.degradation	Cluster	Cluster5	0.000513344	8.18513e-05	121	63	8.26709e-09	7.53765e-08	Cluster1	1.11725e-07			221	UDPNAGSYN.PWY..UDP.N.acetyl.D.glucosamine.biosynthesis.I	Shedder_or_control	Shedder	-0.000223654	0.000219156	121	118	0.31675	0.919024	0.990404			PWY.7761..NAD.salvage.pathway.II..PNC.IV.cycle.	DSC_all	not_DSC	6.9412e-06	9.89813e-06	35	4	0.492329	0.806726
	103	PWY.3841..folate.transformations.II..plants.	Cluster	Cluster2	-0.000565064	8.9047e-05	121	107	1.06678e-08	9.6321e-08	Cluster1	1.42796e-07			222	VALSYN.PWY..L.valine.biosynthesis	Shedder_or_control	Shedder	3.4049e-05	3.93194e-05	121	57	0.39356	0.919024	0.990404			PWY.7790..UMP.biosynthesis.II	DSC_all	not_DSC	0.000170113	0.000202268	35	33	0.408395	0.806726
	104	PANTOSYN.PWY..superpathway.of.coenzyme.A.biosynthesis.I..bacteria.	Cluster	Cluster5	0.000387672	6.24838e-05	121	57	1.08673e-08	9.7179e-08	Cluster1	1.44778e-07			223	X1CMET2.PWY..folate.transformations.III..E..coli.	Shedder_or_control	Shedder	6.3147e-06	1.10488e-05	121	20	0.57202	0.92518	0.991987			PWY.7791..UMP.biosynthesis.III	DSC_all	not_DSC	0.000170113	0.000202268	35	33	0.408395	0.806726
	105	PANTOSYN.PWY..superpathway.of.coenzyme.A.biosynthesis.I..bacteria.	Cluster	Cluster4	0.000322732	5.12492e-05	121	57	1.16373e-08	1.03073e-07	Cluster1	1.5358e-07			227	PWY.5676..acetyl.CoA.fermentation.to.butanoate.II	Shedder_or_control	Shedder	-5.70491e-06	9.93699e-06	121	16	0.57037	0.92518	0.991987			PWY.7851..coenzyme.A.biosynthesis.II..eukaryotic.	DSC_all	not_DSC	0.000170239	0.000132941	35	33	0.212166	0.806726
	106	PWY.6270..isoprene.biosynthesis.I	Cluster	Cluster4	0.000298606	4.84878e-05	121	56	1.42584e-08	1.25097e-07	Cluster1	1.84702e-07			235	CITRULBIO.PWY..L.citrulline.biosynthesis	Shedder_or_control	Shedder	-2.26017e-06	4.26551e-06	121	22	0.600742	0.946765	0.991987			PWY.7953..UDP.N.acetylmuramoyl.pentapeptide.biosynthesis.III..meso.diaminopimelate.containing.	DSC_all	not_DSC	0.000180036	0.000140834	35	20	0.212298	0.806726
	107	PWY.5097..L.lysine.biosynthesis.VI	Cluster	Cluster6	-0.000687517	0.00010924	121	89	1.56436e-08	1.35968e-07	Cluster1	1.98979e-07			236	PYRIDNUCSYN.PWY..NAD.de.novo.biosynthesis.I..from.aspartate.	Shedder_or_control	Shedder	3.00634e-05	5.72262e-05	121	57	0.603181	0.946765	0.991987			PWY.8073..lipid.IVA.biosynthesis..P..putida.	DSC_all	not_DSC	3.48827e-05	4.85508e-05	35	14	0.477519	0.806726
	108	HSERMETANA.PWY..L.methionine.biosynthesis.III	Cluster	Cluster4	0.000208527	3.37278e-05	121	60	2.398e-08	2.06494e-07	Cluster1	3.00927e-07			238	PPGPPMET.PWY..ppGpp.metabolism	Shedder_or_control	Shedder	-3.31822e-06	6.47968e-06	121	26	0.612174	0.956844	0.991987			PWY.8187..L.arginine.degradation.XIII..reductive.Stickland.reaction.	DSC_all	not_DSC	0.000159717	8.78273e-05	35	23	0.0804999	0.806726
	109	PWY.7560..methylerythritol.phosphate.pathway.II	Cluster	Cluster4	0.000283697	4.70842e-05	121	56	2.59044e-08	2.21019e-07	Cluster1	3.23632e-07			239	ANAGLYCOLYSIS.PWY..glycolysis.III..from.glucose.	Shedder_or_control	Shedder	5.25241e-05	0.000103945	121	60	0.617086	0.956948	0.991987			PWY0.1061..superpathway.of.L.alanine.biosynthesis	DSC_all	not_DSC	-0.000120876	0.000136164	35	23	0.382713	0.806726
	110	PWY0.162..superpathway.of.pyrimidine.ribonucleotides.de.novo.biosynthesis	Cluster	Cluster4	0.000325067	5.43433e-05	121	62	3.17016e-08	2.68023e-07	Cluster1	3.85772e-07			240	P461.PWY..hexitol.fermentation.to.lactate..formate..ethanol.and.acetate	Shedder_or_control	Shedder	3.12401e-06	6.3012e-06	121	16	0.626783	0.956948	0.991987			PWY0.1477..ethanolamine.utilization	DSC_all	not_DSC	8.59119e-05	5.44919e-05	35	19	0.126993	0.806726
	111	PWY.6630..superpathway.of.L.tyrosine.biosynthesis	Cluster	Cluster4	0.000191282	3.19178e-05	121	47	3.32642e-08	2.787e-07	Cluster1	4.03042e-07			241	PWY.5030..L.histidine.degradation.III	Shedder_or_control	Shedder	-1.39647e-05	2.87298e-05	121	42	0.630248	0.956948	0.991987			PWY0.162..superpathway.of.pyrimidine.ribonucleotides.de.novo.biosynthesis	DSC_all	not_DSC	0.000117131	8.67256e-05	35	21	0.188408	0.806726
	112	UNINTEGRATED	Cluster	Cluster5	-0.0255618	0.0043228	121	121	3.5312e-08	2.93216e-07	Cluster1	4.26018e-07			242	PWY.5659..GDP.mannose.biosynthesis	Shedder_or_control	Shedder	-1.70296e-05	3.39789e-05	121	48	0.619809	0.956948	0.991987			PWY0.301..L.ascorbate.degradation.I..bacterial..anaerobic.	DSC_all	not_DSC	4.51232e-05	3.50749e-05	35	11	0.209215	0.806726
	113	PWY.7953..UDP.N.acetylmuramoyl.pentapeptide.biosynthesis.III..meso.diaminopimelate.containing.	Cluster	Cluster5	0.000677601	0.000114606	121	60	4.32324e-08	3.49685e-07	Cluster1	5.12867e-07			244	PWY.6936..seleno.amino.acid.biosynthesis..plants.	Shedder_or_control	Shedder	2.1654e-05	4.42154e-05	121	63	0.627937	0.956948	0.991987			PWY0.845..superpathway.of.pyridoxal.5..phosphate.biosynthesis.and.salvage	DSC_all	not_DSC	1.06962e-05	1.12429e-05	35	7	0.351881	0.806726
	114	PYRIDNUCSYN.PWY..NAD.de.novo.biosynthesis.I..from.aspartate.	Cluster	Cluster5	0.000316002	5.34418e-05	121	57	4.32406e-08	3.49685e-07	Cluster1	5.12867e-07			245	PWY0.1298..superpathway.of.pyrimidine.deoxyribonucleosides.degradation	Shedder_or_control	Shedder	-7.19093e-06	1.45313e-05	121	45	0.624268	0.956948	0.991987			PWY0.862...5Z..dodecenoate.biosynthesis.I	DSC_all	not_DSC	-7.05409e-06	7.62779e-06	35	7	0.364067	0.806726
	115	THRESYN.PWY..superpathway.of.L.threonine.biosynthesis	Cluster	Cluster5	-0.000423023	7.20805e-05	121	99	4.32126e-08	3.49685e-07	Cluster1	5.12867e-07			248	RIBOSYN2.PWY..flavin.biosynthesis.I..bacteria.and.plants.	Shedder_or_control	Shedder	-2.31304e-05	5.05108e-05	121	70	0.650355	0.975532	0.991987			PWY4FS.7..phosphatidylglycerol.biosynthesis.I..plastidic.	DSC_all	not_DSC	3.79904e-05	3.88667e-05	35	14	0.335457	0.806726
	116	PWY.7328..superpathway.of.UDP.glucose.derived.O.antigen.building.blocks.biosynthesis	Cluster	Cluster5	0.000120751	2.03178e-05	121	45	4.84708e-08	3.88602e-07	Cluster1	5.67714e-07			249	PANTOSYN.PWY..superpathway.of.coenzyme.A.biosynthesis.I..bacteria.	Shedder_or_control	Shedder	3.37684e-05	7.57988e-05	121	57	0.659227	0.977021	0.991987			PWY4FS.8..phosphatidylglycerol.biosynthesis.II..non.plastidic.	DSC_all	not_DSC	3.79904e-05	3.88667e-05	35	14	0.335457	0.806726
	117	PWY.5695..inosine.5..phosphate.degradation	Cluster	Cluster4	0.000400022	6.68925e-05	121	63	5.0549e-08	4.018e-07	Cluster1	5.89599e-07			250	PWY.5121..superpathway.of.geranylgeranyl.diphosphate.biosynthesis.II..via.MEP.	Shedder_or_control	Shedder	1.01887e-05	2.27634e-05	121	24	0.657735	0.977021	0.991987			PYRIDOXSYN.PWY..pyridoxal.5..phosphate.biosynthesis.I	DSC_all	not_DSC	5.32168e-06	5.84239e-06	35	8	0.362879	0.806726
	118	SER.GLYSYN.PWY..superpathway.of.L.serine.and.glycine.biosynthesis.I	Cluster	Cluster4	0.000152666	2.63167e-05	121	57	6.51017e-08	5.1309e-07	Cluster1	7.56202e-07			251	PWY.6823..molybdopterin.biosynthesis	Shedder_or_control	Shedder	7.51618e-06	1.66817e-05	121	50	0.655586	0.977021	0.991987			RIBOSYN2.PWY..flavin.biosynthesis.I..bacteria.and.plants.	DSC_all	not_DSC	6.07294e-05	4.75447e-05	35	21	0.212755	0.806726
	119	PWY.8187..L.arginine.degradation.XIII..reductive.Stickland.reaction.	Cluster	Cluster4	0.000289355	4.85628e-05	121	69	7.14464e-08	5.58363e-07	Cluster1	8.26485e-07			253	GLUCONEO.PWY..gluconeogenesis.I	Shedder_or_control	Shedder	6.27945e-06	1.58982e-05	121	38	0.695816	0.981914	0.991987			SALVADEHYPOX.PWY..adenosine.nucleotides.degradation.II	DSC_all	not_DSC	2.63187e-06	3.41533e-06	35	4	0.486838	0.806726
	120	PWY.7221..guanosine.ribonucleotides.de.novo.biosynthesis	Cluster	Cluster4	0.000769599	0.000132948	121	112	1.31453e-07	1.01876e-06	Cluster1	1.48998e-06			254	GLUCOSE1PMETAB.PWY..glucose.and.glucose.1.phosphate.degradation	Shedder_or_control	Shedder	-3.07024e-05	7.61886e-05	121	22	0.689804	0.981914	0.991987			SER.GLYSYN.PWY..superpathway.of.L.serine.and.glycine.biosynthesis.I	DSC_all	not_DSC	1.95439e-05	1.80142e-05	35	20	0.288221	0.806726
	121	PWY0.1296..purine.ribonucleosides.degradation	Cluster	Cluster4	0.000132373	2.31856e-05	121	55	1.33255e-07	1.02419e-06	Cluster1	1.49832e-06			255	NONMEVIPP.PWY..methylerythritol.phosphate.pathway.I	Shedder_or_control	Shedder	3.61726e-05	9.31608e-05	121	60	0.700617	0.981914	0.991987			THISYNARA.PWY..superpathway.of.thiamine.diphosphate.biosynthesis.III..eukaryotes.	DSC_all	not_DSC	3.43178e-05	3.68588e-05	35	16	0.360381	0.806726
	122	PWY.5659..GDP.mannose.biosynthesis	Cluster	Cluster5	0.000165466	2.94788e-05	121	48	1.40218e-07	1.06888e-06	Cluster1	1.57033e-06			256	NONOXIPENT.PWY..pentose.phosphate.pathway..non.oxidative.branch..I	Shedder_or_control	Shedder	2.93678e-05	7.3823e-05	121	61	0.693628	0.981914	0.991987			UDPNAGSYN.PWY..UDP.N.acetyl.D.glucosamine.biosynthesis.I	DSC_all	not_DSC	0.000164954	0.000224857	35	33	0.470087	0.806726
	123	PWY.6700..queuosine.biosynthesis.I..de.novo.	Cluster	Cluster4	0.000321405	5.69829e-05	121	59	1.58317e-07	1.19703e-06	Cluster1	1.75901e-06			258	P164.PWY..purine.nucleobases.degradation.I..anaerobic.	Shedder_or_control	Shedder	1.00925e-05	2.39108e-05	121	46	0.675639	0.981914	0.991987			VALSYN.PWY..L.valine.biosynthesis	DSC_all	not_DSC	-5.83752e-05	6.26639e-05	35	17	0.360023	0.806726
	124	PWY.724..superpathway.of.L.lysine..L.threonine.and.L.methionine.biosynthesis.II	Cluster	Cluster3	-0.00068258	0.000120979	121	87	1.63209e-07	1.22407e-06	Cluster1	1.79914e-06			260	P42.PWY..incomplete.reductive.TCA.cycle	Shedder_or_control	Shedder	-3.22494e-06	8.61849e-06	121	24	0.710807	0.981914	0.991987			PWY.8131..5..deoxyadenosine.degradation.II	DSC_all	not_DSC	1.93486e-06	2.55972e-06	35	4	0.508348	0.819917
	125	PWY.7953..UDP.N.acetylmuramoyl.pentapeptide.biosynthesis.III..meso.diaminopimelate.containing.	Cluster	Cluster4	0.000533254	9.37292e-05	121	60	1.77128e-07	1.31783e-06	Cluster1	1.93738e-06			262	PWY.3001..superpathway.of.L.isoleucine.biosynthesis.I	Shedder_or_control	Shedder	1.23128e-05	3.04334e-05	121	43	0.68874	0.981914	0.991987			PWY.6936..seleno.amino.acid.biosynthesis..plants.	DSC_all	not_DSC	3.28569e-05	4.95483e-05	35	21	0.513033	0.820421
	126	COA.PWY..coenzyme.A.biosynthesis.I..prokaryotic.	Cluster	Cluster6	-0.000957578	0.000167648	121	117	1.80579e-07	1.33094e-06	Cluster1	1.96747e-06			267	PWY.6588..pyruvate.fermentation.to.acetone	Shedder_or_control	Shedder	-1.3234e-06	3.67687e-06	121	21	0.71894	0.981914	0.991987			PWY.7323..superpathway.of.GDP.mannose.derived.O.antigen.building.blocks.biosynthesis	DSC_all	not_DSC	4.60797e-06	7.00432e-06	35	6	0.516865	0.820421
	127	PWY.7851..coenzyme.A.biosynthesis.II..eukaryotic.	Cluster	Cluster6	-0.000951969	0.000166762	121	117	1.81752e-07	1.33094e-06	Cluster1	1.9726e-06			268	PWY.6901..superpathway.of.glucose.and.xylose.degradation	Shedder_or_control	Shedder	6.52988e-06	1.67086e-05	121	32	0.698532	0.981914	0.991987			PWY.6385..peptidoglycan.biosynthesis.III..mycobacteria.	DSC_all	not_DSC	9.75477e-05	0.000153502	35	23	0.530709	0.830047
	128	PWY.6628..superpathway.of.L.phenylalanine.biosynthesis	Cluster	Cluster4	0.000200324	3.56162e-05	121	46	1.87162e-07	1.35985e-06	Cluster1	2.00806e-06			269	PWY.7210..pyrimidine.deoxyribonucleotides.biosynthesis.from.CTP	Shedder_or_control	Shedder	6.70389e-06	1.82168e-05	121	17	0.715581	0.981914	0.991987			PWY.6859..all.trans.farnesol.biosynthesis	DSC_all	not_DSC	-7.78385e-06	1.2388e-05	35	6	0.53538	0.830047
	129	P41.PWY..pyruvate.fermentation.to.acetate.and..S..lactate.I	Cluster	Cluster6	-0.00144182	0.000252623	121	116	2.06648e-07	1.48979e-06	Cluster1	2.2087e-06			271	PWY.8178..pentose.phosphate.pathway..non.oxidative.branch..II	Shedder_or_control	Shedder	2.25226e-05	6.23713e-05	121	58	0.720598	0.981914	0.991987			PWY.6901..superpathway.of.glucose.and.xylose.degradation	DSC_all	not_DSC	-1.31147e-05	2.08812e-05	35	11	0.534286	0.830047
	130	ANAGLYCOLYSIS.PWY..glycolysis.III..from.glucose.	Cluster	Cluster4	0.000477449	8.54524e-05	121	60	2.28806e-07	1.63684e-06	Cluster1	2.41794e-06			276	COLANSYN.PWY..colanic.acid.building.blocks.biosynthesis	Shedder_or_control	Shedder	-8.05485e-06	2.49875e-05	121	41	0.749333	0.988462	0.991987			PWY.2942..L.lysine.biosynthesis.III	DSC_all	not_DSC	7.11442e-05	0.000114838	35	27	0.539831	0.830509
	131	PWY.841..superpathway.of.purine.nucleotides.de.novo.biosynthesis.I	Cluster	Cluster5	0.00025242	4.5902e-05	121	57	2.3877e-07	1.69508e-06	Cluster1	2.50441e-06			277	HISDEG.PWY..L.histidine.degradation.I	Shedder_or_control	Shedder	8.54631e-06	2.84515e-05	121	46	0.765759	0.988462	0.991987			PWY66.409..superpathway.of.purine.nucleotide.salvage	DSC_all	not_DSC	-1.33404e-05	2.19524e-05	35	9	0.548819	0.837891
	132	PWY.5100..pyruvate.fermentation.to.acetate.and.lactate.II	Cluster	Cluster6	-0.00141947	0.000252746	121	117	3.01289e-07	2.12272e-06	Cluster1	3.13675e-06			280	PWY.1269..CMP.3.deoxy.D.manno.octulosonate.biosynthesis	Shedder_or_control	Shedder	-5.6945e-06	1.98278e-05	121	46	0.776005	0.988462	0.991987			P122.PWY..heterolactic.fermentation	DSC_all	not_DSC	1.17937e-05	1.99302e-05	35	4	0.55805	0.838314
	133	PWY.841..superpathway.of.purine.nucleotides.de.novo.biosynthesis.I	Cluster	Cluster4	0.000209729	3.83939e-05	121	57	3.24993e-07	2.27251e-06	Cluster1	3.37105e-06			282	PWY.5005..biotin.biosynthesis.II	Shedder_or_control	Shedder	-1.86181e-06	6.38969e-06	121	25	0.77284	0.988462	0.991987			PWY.1042..glycolysis.IV	DSC_all	not_DSC	-6.19655e-05	0.000105053	35	27	0.560495	0.838314
	134	PHOSLIPSYN.PWY..superpathway.of.phospholipid.biosynthesis.I..bacteria.	Cluster	Cluster5	0.000114125	2.1108e-05	121	42	3.61781e-07	2.51087e-06	Cluster1	3.72516e-06			283	PWY.6124..inosine.5..phosphate.biosynthesis.II	Shedder_or_control	Shedder	-5.37204e-05	0.000182341	121	81	0.770387	0.988462	0.991987			PWY.6606..guanosine.nucleotides.degradation.II	DSC_all	not_DSC	2.14422e-05	3.65727e-05	35	9	0.56167	0.838314
	135	PWY.6305..superpathway.of.putrescine.biosynthesis	Cluster	Cluster6	4.79048e-05	8.93925e-06	121	33	3.65689e-07	2.51919e-06	Cluster1	3.75165e-06			284	PWY.7117..C4.photosynthetic.carbon.assimilation.cycle..PEPCK.type	Shedder_or_control	Shedder	-8.2678e-06	2.76161e-05	121	43	0.766952	0.988462	0.991987			PWY.5097..L.lysine.biosynthesis.VI	DSC_all	not_DSC	5.66209e-05	9.93697e-05	35	25	0.572672	0.842164
	136	P41.PWY..pyruvate.fermentation.to.acetate.and..S..lactate.I	Cluster	Cluster4	-0.000559007	0.000100558	121	116	3.78318e-07	2.58703e-06	Cluster1	3.8671e-06			285	PWY.7197..pyrimidine.deoxyribonucleotide.phosphorylation	Shedder_or_control	Shedder	-1.6667e-05	5.4031e-05	121	76	0.759904	0.988462	0.991987			PWY0.1298..superpathway.of.pyrimidine.deoxyribonucleosides.degradation	DSC_all	not_DSC	8.09094e-06	1.40511e-05	35	12	0.569713	0.842164
	137	PWY.5100..pyruvate.fermentation.to.acetate.and.lactate.II	Cluster	Cluster4	-0.000558781	0.000100607	121	117	3.84439e-07	2.60969e-06	Cluster1	3.91543e-06			288	PWY.8187..L.arginine.degradation.XIII..reductive.Stickland.reaction.	Shedder_or_control	Shedder	2.17191e-05	7.18846e-05	121	69	0.764719	0.988462	0.991987			PWY66.399..gluconeogenesis.III	DSC_all	not_DSC	-8.74237e-06	1.58976e-05	35	4	0.587049	0.857006
	138	PWY.5097..L.lysine.biosynthesis.VI	Cluster	Cluster3	-0.000697485	0.000129547	121	89	4.44132e-07	2.99307e-06	Cluster1	4.50706e-06			293	SER.GLYSYN.PWY..superpathway.of.L.serine.and.glycine.biosynthesis.I	Shedder_or_control	Shedder	-1.32605e-05	3.89186e-05	121	57	0.735737	0.988462	0.991987			PWY66.389..phytol.degradation	DSC_all	not_DSC	3.1554e-06	5.92052e-06	35	13	0.594383	0.861425
	139	PWY.7663..gondoate.biosynthesis..anaerobic.	Cluster	Cluster5	0.000191964	3.58007e-05	121	57	5.26531e-07	3.50237e-06	Cluster1	5.25555e-06			295	UNINTEGRATED	Shedder_or_control	Shedder	0.001287	0.00585286	121	121	0.827609	0.989313	0.991987			PWY.7663..gondoate.biosynthesis..anaerobic.	DSC_all	not_DSC	3.02234e-05	5.68679e-05	35	19	0.599695	0.862871
	140	VALSYN.PWY..L.valine.biosynthesis	Cluster	Cluster5	0.000203085	3.79703e-05	121	57	5.27238e-07	3.50237e-06	Cluster1	5.25555e-06			296	ANAEROFRUCAT.PWY..homolactic.fermentation	Shedder_or_control	Shedder	1.07089e-06	4.99634e-05	121	54	0.98304	0.989313	0.991987			HEME.BIOSYNTHESIS.II..heme.b.biosynthesis.I..aerobic.	DSC_all	not_DSC	4.40985e-06	8.97729e-06	35	12	0.627519	0.865701
	141	PWY0.862...5Z..dodecenoate.biosynthesis.I	Cluster	Cluster6	9.2257e-05	1.68848e-05	121	19	8.29782e-07	5.47303e-06	Cluster1	8.09902e-06			297	CALVIN.PWY..Calvin.Benson.Bassham.cycle	Shedder_or_control	Shedder	9.8844e-06	8.26338e-05	121	54	0.905593	0.989313	0.991987			HEMESYN2.PWY..heme.b.biosynthesis.II..oxygen.independent.	DSC_all	not_DSC	6.35226e-06	1.32348e-05	35	11	0.635393	0.865701
	142	PWY.1042..glycolysis.IV	Cluster	Cluster3	0.00125277	0.000240767	121	93	8.71981e-07	5.69804e-06	Cluster1	8.42315e-06			300	COMPLETE.ARO.PWY..superpathway.of.aromatic.amino.acid.biosynthesis	Shedder_or_control	Shedder	-6.03009e-06	8.98056e-05	121	57	0.946921	0.989313	0.991987			PWY.5695..inosine.5..phosphate.degradation	DSC_all	not_DSC	-7.3014e-05	0.000144229	35	22	0.616055	0.865701
	143	PWY.5103..L.isoleucine.biosynthesis.III	Cluster	Cluster5	0.000168118	3.21202e-05	121	52	8.76149e-07	5.69804e-06	Cluster1	8.43444e-06			305	GLYCOGENSYNTH.PWY..glycogen.biosynthesis.I..from.ADP.D.Glucose.	Shedder_or_control	Shedder	3.24102e-05	0.000131372	121	68	0.806866	0.989313	0.991987			PWY.7383..anaerobic.energy.metabolism..invertebrates..cytosol.	DSC_all	not_DSC	7.63185e-06	1.48226e-05	35	6	0.611045	0.865701
	144	PWY.7851..coenzyme.A.biosynthesis.II..eukaryotic.	Cluster	Cluster2	0.000424708	7.96322e-05	121	117	8.84293e-07	5.71106e-06	Cluster1	8.48378e-06			307	HSERMETANA.PWY..L.methionine.biosynthesis.III	Shedder_or_control	Shedder	-3.04648e-06	4.57335e-05	121	60	0.947343	0.989313	0.991987			PWY.8178..pentose.phosphate.pathway..non.oxidative.branch..II	DSC_all	not_DSC	2.38094e-05	4.65733e-05	35	18	0.613606	0.865701
	145	ILEUSYN.PWY..L.isoleucine.biosynthesis.I..from.threonine.	Cluster	Cluster5	0.000183841	3.52177e-05	121	52	9.34476e-07	5.99354e-06	Cluster1	8.90445e-06			309	LACTOSECAT.PWY..lactose.and.galactose.degradation.I	Shedder_or_control	Shedder	4.67331e-06	0.000264301	121	75	0.986011	0.989313	0.991987			PWY.841..superpathway.of.purine.nucleotides.de.novo.biosynthesis.I	DSC_all	not_DSC	2.51466e-05	5.13428e-05	35	18	0.628482	0.865701
	146	PWY.7199..pyrimidine.deoxyribonucleosides.salvage	Cluster	Cluster3	0.00150863	0.000292299	121	79	1.0666e-06	6.79407e-06	Cluster1	1.00377e-05			311	P124.PWY..Bifidobacterium.shunt	Shedder_or_control	Shedder	-1.91032e-05	0.000116323	121	58	0.870679	0.989313	0.991987			PWY.I9..L.cysteine.biosynthesis.VI..from.L.methionine.	DSC_all	not_DSC	4.1252e-05	8.41557e-05	35	4	0.627983	0.865701
	147	HSERMETANA.PWY..L.methionine.biosynthesis.III	Cluster	Cluster5	0.000214802	4.14559e-05	121	60	1.12375e-06	7.10944e-06	Cluster1	1.04946e-05			315	PENTOSE.P.PWY..pentose.phosphate.pathway	Shedder_or_control	Shedder	-6.42088e-06	7.44466e-05	121	59	0.931852	0.989313	0.991987			TRNA.CHARGING.PWY..tRNA.charging	DSC_all	not_DSC	-0.000152947	0.000319521	35	32	0.63629	0.865701
	148	PWY.2942..L.lysine.biosynthesis.III	Cluster	Cluster6	-0.000710648	0.000135702	121	92	1.32685e-06	8.33761e-06	Cluster1	1.23094e-05			316	PWY.1042..glycolysis.IV	Shedder_or_control	Shedder	-2.2495e-06	0.000108077	121	93	0.983539	0.989313	0.991987			X1CMET2.PWY..folate.transformations.III..E..coli.	DSC_all	not_DSC	7.59408e-06	1.67362e-05	35	9	0.653759	0.883459
	149	COA.PWY..coenzyme.A.biosynthesis.I..prokaryotic.	Cluster	Cluster2	0.000418086	8.00579e-05	121	117	1.36952e-06	8.54804e-06	Cluster1	1.26636e-05			319	PWY.5265..peptidoglycan.biosynthesis.II..staphylococci.	Shedder_or_control	Shedder	-5.43991e-06	9.46056e-05	121	59	0.95454	0.989313	0.991987			ANAEROFRUCAT.PWY..homolactic.fermentation	DSC_all	not_DSC	3.16437e-05	7.37433e-05	35	17	0.671251	0.895002
	150	CALVIN.PWY..Calvin.Benson.Bassham.cycle	Cluster	Cluster5	0.000341055	6.73284e-05	121	54	1.58166e-06	9.80627e-06	Cluster1	1.44352e-05			320	PWY.5384..sucrose.degradation.IV..sucrose.phosphorylase.	Shedder_or_control	Shedder	-1.17397e-05	9.20953e-05	121	58	0.899453	0.989313	0.991987			PWY.5384..sucrose.degradation.IV..sucrose.phosphorylase.	DSC_all	not_DSC	4.06649e-05	9.3681e-05	35	19	0.667651	0.895002
	151	PWY0.1296..purine.ribonucleosides.degradation	Cluster	Cluster5	0.00014252	2.80776e-05	121	55	1.59985e-06	9.8534e-06	Cluster1	1.4554e-05			321	PWY.5484..glycolysis.II..from.fructose.6.phosphate.	Shedder_or_control	Shedder	1.44484e-05	6.35911e-05	121	58	0.821821	0.989313	0.991987			CALVIN.PWY..Calvin.Benson.Bassham.cycle	DSC_all	not_DSC	2.37786e-05	6.29879e-05	35	17	0.708912	0.926682
	152	PWY.7357..thiamine.phosphate.formation.from.pyrithiamine.and.oxythiamine..yeast.	Cluster	Cluster4	0.000307992	5.87733e-05	121	65	1.71744e-06	1.0508e-05	Cluster1	1.55232e-05			322	PWY.5667..CDP.diacylglycerol.biosynthesis.I	Shedder_or_control	Shedder	-5.17713e-06	0.00018013	121	92	0.977263	0.989313	0.991987			GLYCOCAT.PWY..glycogen.degradation.I	DSC_all	not_DSC	4.78614e-06	1.23051e-05	35	5	0.699806	0.926682
	153	PWY.7221..guanosine.ribonucleotides.de.novo.biosynthesis	Cluster	Cluster2	-0.000803424	0.00015853	121	112	2.00905e-06	1.22119e-05	Cluster1	1.79855e-05			324	PWY.5686..UMP.biosynthesis.I	Shedder_or_control	Shedder	-6.04088e-05	0.000224654	121	116	0.790122	0.989313	0.991987			PWY0.1586..peptidoglycan.maturation..meso.diaminopimelate.containing.	DSC_all	not_DSC	2.48437e-05	6.51481e-05	35	22	0.706101	0.926682
	154	PWY.2942..L.lysine.biosynthesis.III	Cluster	Cluster5	-0.00033143	6.61014e-05	121	92	2.2124e-06	1.33606e-05	Cluster1	1.96805e-05			325	PWY.5941..glycogen.degradation.II	Shedder_or_control	Shedder	-5.04704e-06	0.000299128	121	79	0.986653	0.989313	0.991987			PWY.6284..superpathway.of.unsaturated.fatty.acids.biosynthesis..E..coli.	DSC_all	not_DSC	-3.27982e-06	9.17909e-06	35	6	0.724565	0.939815
	155	PWY.6703..preQ0.biosynthesis	Cluster	Cluster5	0.000203227	4.09209e-05	121	56	2.5937e-06	1.55622e-05	Cluster1	2.27131e-05			326	PWY.5981..CDP.diacylglycerol.biosynthesis.III	Shedder_or_control	Shedder	7.51525e-06	4.81024e-05	121	45	0.876946	0.989313	0.991987			PWY.6588..pyruvate.fermentation.to.acetone	DSC_all	not_DSC	-1.48998e-06	4.28917e-06	35	5	0.728357	0.939815
	156	PWY.6823..molybdopterin.biosynthesis	Cluster	Cluster5	9.08683e-05	1.82617e-05	121	50	2.93652e-06	1.75062e-05	Cluster1	2.55559e-05			327	PWY.6121..5.aminoimidazole.ribonucleotide.biosynthesis.I	Shedder_or_control	Shedder	-3.14362e-05	0.000191822	121	77	0.870968	0.989313	0.991987			PWY.6969..TCA.cycle.V..2.oxoglutarate.synthase.	DSC_all	not_DSC	4.96245e-06	1.44337e-05	35	9	0.733819	0.940793
	157	PWY.7111..pyruvate.fermentation.to.isobutanol..engineered.	Cluster	Cluster5	0.000157418	3.18313e-05	121	52	2.98687e-06	1.76929e-05	Cluster1	2.59138e-05			328	PWY.6122..5.aminoimidazole.ribonucleotide.biosynthesis.II	Shedder_or_control	Shedder	-2.86684e-05	0.000212467	121	82	0.893599	0.989313	0.991987			NONOXIPENT.PWY..pentose.phosphate.pathway..non.oxidative.branch..I	DSC_all	not_DSC	-1.94454e-05	5.85829e-05	35	20	0.742648	0.944794
	158	NONOXIPENT.PWY..pentose.phosphate.pathway..non.oxidative.branch..I	Cluster	Cluster5	0.000299632	6.12853e-05	121	61	3.33156e-06	1.96098e-05	Cluster1	2.8727e-05			329	PWY.6123..inosine.5..phosphate.biosynthesis.I	Shedder_or_control	Shedder	-1.65295e-05	0.000207574	121	82	0.937077	0.989313	0.991987			PWY.5918..superpathway.of.heme.b.biosynthesis.from.glutamate	DSC_all	not_DSC	3.64172e-06	1.18211e-05	35	8	0.760559	0.944794
	159	PWY.6703..preQ0.biosynthesis	Cluster	Cluster4	0.000166528	3.36199e-05	121	56	3.37169e-06	1.97212e-05	Cluster1	2.89842e-05			330	PWY.6147..6.hydroxymethyl.dihydropterin.diphosphate.biosynthesis.I	Shedder_or_control	Shedder	-4.90777e-05	0.00019524	121	89	0.803262	0.989313	0.991987			PWY.6270..isoprene.biosynthesis.I	DSC_all	not_DSC	2.31689e-05	7.51573e-05	35	17	0.760348	0.944794
	160	ASPASN.PWY..superpathway.of.L.aspartate.and.L.asparagine.biosynthesis	Cluster	Cluster5	0.000194228	3.95745e-05	121	67	3.43933e-06	1.99911e-05	Cluster1	2.94755e-05			331	PWY.6163..chorismate.biosynthesis.from.3.dehydroquinate	Shedder_or_control	Shedder	1.44617e-05	0.000137906	121	65	0.917204	0.989313	0.991987			PWY0.1319..CDP.diacylglycerol.biosynthesis.II	DSC_all	not_DSC	-6.65285e-05	0.000213115	35	27	0.75736	0.944794
	161	PWY.6630..superpathway.of.L.tyrosine.biosynthesis	Cluster	Cluster5	0.000187291	3.83739e-05	121	47	3.53991e-06	2.0448e-05	Cluster1	3.00625e-05			333	PWY.6270..isoprene.biosynthesis.I	Shedder_or_control	Shedder	1.23673e-05	7.65516e-05	121	56	0.872756	0.989313	0.991987			PWY4LZ.257..superpathway.of.fermentation..Chlamydomonas.reinhardtii.	DSC_all	not_DSC	2.51603e-06	7.72928e-06	35	5	0.748478	0.944794
	162	PWY.241..C4.photosynthetic.carbon.assimilation.cycle..NADP.ME.type	Cluster	Cluster5	0.000153012	3.14026e-05	121	49	3.74589e-06	2.15042e-05	Cluster1	3.1432e-05			334	PWY.6277..superpathway.of.5.aminoimidazole.ribonucleotide.biosynthesis	Shedder_or_control	Shedder	-2.86684e-05	0.000212467	121	82	0.893599	0.989313	0.991987			PWY.5667..CDP.diacylglycerol.biosynthesis.I	DSC_all	not_DSC	-6.42312e-05	0.000213201	35	27	0.765566	0.945143
	163	PWY.241..C4.photosynthetic.carbon.assimilation.cycle..NADP.ME.type	Cluster	Cluster4	0.000126888	2.59298e-05	121	49	4.05053e-06	2.31104e-05	Cluster1	3.37865e-05			336	PWY.6385..peptidoglycan.biosynthesis.III..mycobacteria.	Shedder_or_control	Shedder	1.9284e-05	0.000162668	121	73	0.90645	0.989313	0.991987			GLUCONEO.PWY..gluconeogenesis.I	DSC_all	not_DSC	-6.70293e-06	2.58262e-05	35	11	0.796831	0.972861
	164	PWY.7663..gondoate.biosynthesis..anaerobic.	Cluster	Cluster4	0.000143038	2.91035e-05	121	57	4.65956e-06	2.64231e-05	Cluster1	3.82983e-05			338	PWY.6527..stachyose.degradation	Shedder_or_control	Shedder	-6.94557e-06	6.54531e-05	121	69	0.916267	0.989313	0.991987			POLYISOPRENSYN.PWY..polyisoprenoid.biosynthesis..E..coli.	DSC_all	not_DSC	5.39286e-06	2.12872e-05	35	12	0.802023	0.972861
	165	PWY.6897..thiamine.diphosphate.salvage.II	Cluster	Cluster4	0.00018316	3.75359e-05	121	50	4.71499e-06	2.65754e-05	Cluster1	3.86409e-05			340	PWY.6700..queuosine.biosynthesis.I..de.novo.	Shedder_or_control	Shedder	2.21357e-05	8.79048e-05	121	59	0.80293	0.989313	0.991987			THRESYN.PWY..superpathway.of.L.threonine.biosynthesis	DSC_all	not_DSC	2.57663e-05	0.000102251	35	30	0.80261	0.972861
	166	COLANSYN.PWY..colanic.acid.building.blocks.biosynthesis	Cluster	Cluster5	0.000117404	2.44505e-05	121	41	4.86062e-06	2.72312e-05	Cluster1	3.96035e-05			341	PWY.6703..preQ0.biosynthesis	Shedder_or_control	Shedder	-3.27532e-06	4.54552e-05	121	56	0.943029	0.989313	0.991987			FERMENTATION.PWY..mixed.acid.fermentation	DSC_all	not_DSC	-3.56212e-06	1.73374e-05	35	9	0.83888	0.985568
	167	COA.PWY.1..superpathway.of.coenzyme.A.biosynthesis.III..mammals.	Cluster	Cluster6	-0.00098453	0.000199796	121	108	5.26214e-06	2.90156e-05	Cluster1	4.22269e-05			344	PWY.6969..TCA.cycle.V..2.oxoglutarate.synthase.	Shedder_or_control	Shedder	1.87738e-06	1.42556e-05	121	31	0.896106	0.989313	0.991987			GLCMANNANAUT.PWY..superpathway.of.N.acetylglucosamine..N.acetylmannosamine.and.N.acetylneuraminate.degradation	DSC_all	not_DSC	1.66757e-05	8.21827e-05	35	19	0.840758	0.985568
	168	PWY.1269..CMP.3.deoxy.D.manno.octulosonate.biosynthesis	Cluster	Cluster4	6.65233e-05	1.38755e-05	121	46	5.21115e-06	2.90156e-05	Cluster1	4.19729e-05			348	PWY.7208..superpathway.of.pyrimidine.nucleobases.salvage	Shedder_or_control	Shedder	1.78262e-05	6.68073e-05	121	80	0.791488	0.989313	0.991987			GLYCOLYSIS.E.D..superpathway.of.glycolysis.and.the.Entner.Doudoroff.pathway	DSC_all	not_DSC	3.11726e-06	1.4672e-05	35	8	0.833053	0.985568
	169	PWY.3841..folate.transformations.II..plants.	Cluster	Cluster6	-0.000908211	0.000186478	121	107	5.27273e-06	2.90156e-05	Cluster1	4.22269e-05			349	PWY.7221..guanosine.ribonucleotides.de.novo.biosynthesis	Shedder_or_control	Shedder	4.65082e-05	0.000202674	121	112	0.820215	0.989313	0.991987			PWY.7560..methylerythritol.phosphate.pathway.II	DSC_all	not_DSC	1.46009e-05	7.19601e-05	35	17	0.840803	0.985568
	170	PWY66.389..phytol.degradation	Cluster	Cluster5	3.06246e-05	6.3527e-06	121	39	6.10237e-06	3.33835e-05	Cluster1	4.83204e-05			350	PWY.7234..inosine.5..phosphate.biosynthesis.III	Shedder_or_control	Shedder	-2.01572e-05	0.000190142	121	78	0.916306	0.989313	0.991987			PWY.8004..Entner.Doudoroff.pathway.I	DSC_all	not_DSC	2.38334e-06	1.23035e-05	35	8	0.847588	0.985568
	171	COA.PWY..coenzyme.A.biosynthesis.I..prokaryotic.	Cluster	Cluster4	-0.000325956	6.64461e-05	121	117	6.22893e-06	3.38766e-05	Cluster1	4.91841e-05			351	PWY.7238..sucrose.biosynthesis.II	Shedder_or_control	Shedder	-2.52771e-05	0.000367812	121	79	0.945679	0.989313	0.991987			PWY.922..mevalonate.pathway.I..eukaryotes.and.bacteria.	DSC_all	not_DSC	-4.75179e-05	0.000220428	35	22	0.830988	0.985568
	172	PWY.7851..coenzyme.A.biosynthesis.II..eukaryotic.	Cluster	Cluster4	-0.000319869	6.60651e-05	121	117	7.98171e-06	4.31569e-05	Cluster1	6.14701e-05			352	PWY.7328..superpathway.of.UDP.glucose.derived.O.antigen.building.blocks.biosynthesis	Shedder_or_control	Shedder	5.02832e-06	1.8535e-05	121	45	0.788004	0.989313	0.991987			PYRIDNUCSYN.PWY..NAD.de.novo.biosynthesis.I..from.aspartate.	DSC_all	not_DSC	-1.57143e-05	7.88401e-05	35	19	0.843514	0.985568
	173	PWY0.1586..peptidoglycan.maturation..meso.diaminopimelate.containing.	Cluster	Cluster5	0.000226219	4.82714e-05	121	69	8.11795e-06	4.36398e-05	Cluster1	6.21786e-05			353	PWY.7356..thiamine.diphosphate.salvage.IV..yeast.	Shedder_or_control	Shedder	2.98277e-06	2.03234e-05	121	21	0.884304	0.989313	0.991987			ASPASN.PWY..superpathway.of.L.aspartate.and.L.asparagine.biosynthesis	DSC_all	not_DSC	1.06822e-05	6.01585e-05	35	21	0.860393	0.987755
	174	P461.PWY..hexitol.fermentation.to.lactate..formate..ethanol.and.acetate	Cluster	Cluster6	6.34398e-05	1.35873e-05	121	16	8.25729e-06	4.41338e-05	Cluster1	6.29031e-05			355	PWY.7383..anaerobic.energy.metabolism..invertebrates..cytosol.	Shedder_or_control	Shedder	2.91052e-07	1.26603e-05	121	26	0.981815	0.989313	0.991987			PWY.621..sucrose.degradation.III..sucrose.invertase.	DSC_all	not_DSC	4.30835e-06	2.92535e-05	35	13	0.884041	0.987755
	175	THRESYN.PWY..superpathway.of.L.threonine.biosynthesis	Cluster	Cluster6	-0.000676046	0.000145687	121	99	9.28126e-06	4.93233e-05	Cluster1	6.93873e-05			356	PWY.7560..methylerythritol.phosphate.pathway.II	Shedder_or_control	Shedder	1.33314e-05	7.42861e-05	121	56	0.8588	0.989313	0.991987			PWY.6823..molybdopterin.biosynthesis	DSC_all	not_DSC	2.97757e-06	1.99751e-05	35	16	0.882644	0.987755
	176	RIBOSYN2.PWY..flavin.biosynthesis.I..bacteria.and.plants.	Cluster	Cluster2	-0.000225372	4.89101e-05	121	70	1.06115e-05	5.60722e-05	Cluster1	7.87044e-05			358	PWY.7953..UDP.N.acetylmuramoyl.pentapeptide.biosynthesis.III..meso.diaminopimelate.containing.	Shedder_or_control	Shedder	7.32276e-06	0.000138798	121	60	0.958281	0.989313	0.991987			PWY.7204..pyridoxal.5..phosphate.salvage.II..plants.	DSC_all	not_DSC	1.06059e-06	6.84564e-06	35	4	0.878118	0.987755
	177	PWY.6897..thiamine.diphosphate.salvage.II	Cluster	Cluster5	0.000211866	4.5938e-05	121	50	1.12812e-05	5.9274e-05	Cluster1	8.34511e-05			360	PWY.922..mevalonate.pathway.I..eukaryotes.and.bacteria.	Shedder_or_control	Shedder	-1.47681e-05	0.000200791	121	66	0.941858	0.989313	0.991987			PWY.7345..superpathway.of.anaerobic.sucrose.degradation	DSC_all	not_DSC	9.02383e-06	5.57047e-05	35	10	0.872298	0.987755
	178	PWY.6608..guanosine.nucleotides.degradation.III	Cluster	Cluster5	0.000174345	3.79388e-05	121	52	1.19273e-05	6.2317e-05	Cluster1	8.79994e-05			362	PWY0.1296..purine.ribonucleosides.degradation	Shedder_or_control	Shedder	7.25354e-07	3.17851e-05	121	55	0.981948	0.989313	0.991987			PWY.7977..L.methionine.biosynthesis.IV	DSC_all	not_DSC	-2.64327e-06	1.48066e-05	35	8	0.859406	0.987755
	179	PWY.8178..pentose.phosphate.pathway..non.oxidative.branch..II	Cluster	Cluster5	0.000240102	5.25611e-05	121	58	1.25163e-05	6.50286e-05	Cluster1	9.13849e-05			363	PWY0.1297..superpathway.of.purine.deoxyribonucleosides.degradation	Shedder_or_control	Shedder	-2.34982e-06	1.72576e-05	121	40	0.8926	0.989313	0.991987			PWY0.1241..ADP.L.glycero..beta..D.manno.heptose.biosynthesis	DSC_all	not_DSC	4.32096e-07	2.67744e-06	35	5	0.881431	0.987755
	180	CALVIN.PWY..Calvin.Benson.Bassham.cycle	Cluster	Cluster4	0.000258706	5.64902e-05	121	54	1.27312e-05	6.5778e-05	Cluster1	9.2474e-05			364	PWY0.1319..CDP.diacylglycerol.biosynthesis.II	Shedder_or_control	Shedder	-6.72905e-06	0.000179738	121	93	0.970386	0.989313	0.991987			FASYN.ELONG.PWY..fatty.acid.elongation....saturated	DSC_all	not_DSC	3.33813e-07	1.50947e-05	35	6	0.982631	0.9897
	181	PWY.6151..S.adenosyl.L.methionine.salvage.I	Cluster	Cluster6	-0.00101284	0.000220988	121	107	1.53138e-05	7.86841e-05	Cluster1	0.000109535			365	PWY0.845..superpathway.of.pyridoxal.5..phosphate.biosynthesis.and.salvage	Shedder_or_control	Shedder	-4.53825e-07	1.15076e-05	121	25	0.968811	0.989313	0.991987			LACTOSECAT.PWY..lactose.and.galactose.degradation.I	DSC_all	not_DSC	-2.90066e-05	0.000307193	35	22	0.925489	0.9897
	182	BRANCHED.CHAIN.AA.SYN.PWY..superpathway.of.branched.chain.amino.acid.biosynthesis	Cluster	Cluster5	0.000149908	3.30369e-05	121	45	1.6825e-05	8.5974e-05	Cluster1	0.000119432			367	PWY4LZ.257..superpathway.of.fermentation..Chlamydomonas.reinhardtii.	Shedder_or_control	Shedder	-1.31551e-06	6.59513e-06	121	16	0.843332	0.989313	0.991987			P124.PWY..Bifidobacterium.shunt	DSC_all	not_DSC	1.67391e-05	0.000133969	35	17	0.901501	0.9897
	183	PWY.5189..tetrapyrrole.biosynthesis.II..from.glycine.	Cluster	Cluster5	8.35204e-05	1.86398e-05	121	45	1.76656e-05	8.97759e-05	Cluster1	0.000125083			368	PWY66.389..phytol.degradation	Shedder_or_control	Shedder	7.95348e-07	4.87825e-06	121	39	0.871574	0.989313	0.991987			P42.PWY..incomplete.reductive.TCA.cycle	DSC_all	not_DSC	-3.97752e-07	4.64071e-06	35	8	0.931698	0.9897
	184	P41.PWY..pyruvate.fermentation.to.acetate.and..S..lactate.I	Cluster	Cluster5	-0.000557721	0.000123919	121	116	1.85752e-05	9.35045e-05	Cluster1	0.000130537			369	PYRIDOXSYN.PWY..pyridoxal.5..phosphate.biosynthesis.I	Shedder_or_control	Shedder	2.36335e-07	9.78586e-06	121	26	0.980902	0.989313	0.991987			P441.PWY..superpathway.of.N.acetylneuraminate.degradation	DSC_all	not_DSC	3.01735e-07	1.44312e-05	35	6	0.98348	0.9897
	185	PENTOSE.P.PWY..pentose.phosphate.pathway	Cluster	Cluster4	0.000223401	4.99328e-05	121	59	1.87156e-05	9.35045e-05	Cluster1	0.000131144			370	TRNA.CHARGING.PWY..tRNA.charging	Shedder_or_control	Shedder	-1.46215e-05	0.000222019	121	115	0.947977	0.989313	0.991987			PWY.4984..urea.cycle	DSC_all	not_DSC	7.07011e-08	1.52207e-06	35	4	0.966159	0.9897
	186	PWY.5100..pyruvate.fermentation.to.acetate.and.lactate.II	Cluster	Cluster5	-0.000557436	0.00012395	121	117	1.88014e-05	9.35045e-05	Cluster1	0.000131144			372	ARO.PWY..chorismate.biosynthesis.I	Shedder_or_control	Shedder	-7.92067e-08	0.000128687	121	64	0.999513	0.999513	0.999513			PWY.5188..tetrapyrrole.biosynthesis.I..from.glutamate.	DSC_all	not_DSC	4.43307e-07	2.29669e-05	35	15	0.984751	0.9897
	187	PWY.6628..superpathway.of.L.phenylalanine.biosynthesis	Cluster	Cluster5	0.000192568	4.30373e-05	121	46	1.87899e-05	9.35045e-05	Cluster1	0.000131144			2	X1CMET2.PWY..folate.transformations.III..E..coli.	Days_since_visit1	Days_since_visit1	-8.90869e-06	4.3172e-06	121	20	0.041822	0.919024	0.68736			PWY.5189..tetrapyrrole.biosynthesis.II..from.glycine.	DSC_all	not_DSC	-4.72256e-07	1.83272e-05	35	14	0.979644	0.9897
	188	PWY.4041...gamma..glutamyl.cycle	Cluster	Cluster5	9.57331e-05	2.12625e-05	121	48	2.13958e-05	0.000105841	Cluster1	0.000147773			3	ANAGLYCOLYSIS.PWY..glycolysis.III..from.glucose.	Days_since_visit1	Days_since_visit1	-3.52532e-05	3.3042e-05	121	60	0.288772	0.919024	0.767309			PWY.5484..glycolysis.II..from.fructose.6.phosphate.	DSC_all	not_DSC	4.93982e-06	8.50607e-05	35	18	0.954127	0.9897
	189	GLCMANNANAUT.PWY..superpathway.of.N.acetylglucosamine..N.acetylmannosamine.and.N.acetylneuraminate.degradation	Cluster	Cluster3	-0.000676677	0.000154233	121	72	2.58398e-05	0.000127148	Cluster1	0.000175448			6	ARO.PWY..chorismate.biosynthesis.I	Days_since_visit1	Days_since_visit1	-4.84909e-05	3.75876e-05	121	64	0.200262	0.919024	0.745766			PWY.5913..partial.TCA.cycle..obligate.autotrophs.	DSC_all	not_DSC	-2.8911e-06	2.34855e-05	35	9	0.903008	0.9897
	190	SER.GLYSYN.PWY..superpathway.of.L.serine.and.glycine.biosynthesis.I	Cluster	Cluster5	0.000135696	3.12206e-05	121	57	3.00708e-05	0.000147189	Cluster1	0.000202223			7	ASPASN.PWY..superpathway.of.L.aspartate.and.L.asparagine.biosynthesis	Days_since_visit1	Days_since_visit1	-2.08026e-05	1.19853e-05	121	67	0.0859371	0.919024	0.68736			PWY.5971..palmitate.biosynthesis..type.II.fatty.acid.synthase.	DSC_all	not_DSC	-8.52222e-07	1.46081e-05	35	6	0.954214	0.9897
	191	PWY.2942..L.lysine.biosynthesis.III	Cluster	Cluster3	-0.000700254	0.000160856	121	92	3.11811e-05	0.000151824	Cluster1	0.00020869			10	CALVIN.PWY..Calvin.Benson.Bassham.cycle	Days_since_visit1	Days_since_visit1	-2.09055e-05	1.88864e-05	121	54	0.271235	0.919024	0.767309			PWY.5973..cis.vaccenate.biosynthesis	DSC_all	not_DSC	-6.13545e-06	6.1559e-05	35	21	0.921327	0.9897
	192	ANAGLYCOLYSIS.PWY..glycolysis.III..from.glucose.	Cluster	Cluster5	0.000447044	0.00010338	121	60	3.40052e-05	0.000164713	Cluster1	0.000225445			12	COA.PWY..coenzyme.A.biosynthesis.I..prokaryotic.	Days_since_visit1	Days_since_visit1	3.77029e-05	2.84104e-05	121	117	0.187938	0.919024	0.745766			PWY.5981..CDP.diacylglycerol.biosynthesis.III	DSC_all	not_DSC	-1.07801e-05	9.48242e-05	35	13	0.910177	0.9897
	193	PWY.5188..tetrapyrrole.biosynthesis.I..from.glutamate.	Cluster	Cluster5	9.72408e-05	2.30017e-05	121	48	4.76054e-05	0.000228211	Cluster1	0.000304826			14	COLANSYN.PWY..colanic.acid.building.blocks.biosynthesis	Days_since_visit1	Days_since_visit1	-1.12024e-05	6.68421e-06	121	41	0.0970901	0.919024	0.68736			PWY.6147..6.hydroxymethyl.dihydropterin.diphosphate.biosynthesis.I	DSC_all	not_DSC	-7.46619e-06	0.000198718	35	27	0.970312	0.9897
	194	PWY.6527..stachyose.degradation	Cluster	Cluster2	-0.00028666	6.78017e-05	121	69	4.75547e-05	0.000228211	Cluster1	0.000304826			15	COMPLETE.ARO.PWY..superpathway.of.aromatic.amino.acid.biosynthesis	Days_since_visit1	Days_since_visit1	-1.36148e-05	2.13409e-05	121	57	0.525093	0.919024	0.848358			PWY.6282..palmitoleate.biosynthesis.I..from..5Z..dodec.5.enoate.	DSC_all	not_DSC	-1.07087e-06	1.31297e-05	35	6	0.935955	0.9897
	195	PWY.5367..petroselinate.biosynthesis	Cluster	Cluster4	-0.000193371	4.51505e-05	121	44	5.09703e-05	0.000243089	Cluster1	0.000324157			18	FERMENTATION.PWY..mixed.acid.fermentation	Days_since_visit1	Days_since_visit1	4.09406e-06	5.43883e-06	121	29	0.45356	0.919024	0.835269			PWY.7221..guanosine.ribonucleotides.de.novo.biosynthesis	DSC_all	not_DSC	-1.42813e-05	0.00035058	35	32	0.967821	0.9897
	196	PENTOSE.P.PWY..pentose.phosphate.pathway	Cluster	Cluster5	0.000247872	5.91069e-05	121	59	5.4229e-05	0.000257311	Cluster1	0.000341788			21	GLUCONEO.PWY..gluconeogenesis.I	Days_since_visit1	Days_since_visit1	5.33994e-06	6.42068e-06	121	38	0.407712	0.919024	0.827128			PWY.7664..oleate.biosynthesis.IV..anaerobic.	DSC_all	not_DSC	-2.7933e-07	1.41379e-05	35	6	0.984484	0.9897
	197	GLYCOLYSIS..glycolysis.I..from.glucose.6.phosphate.	Cluster	Cluster3	0.00116121	0.000277521	121	84	5.65356e-05	0.000266894	Cluster1	0.000354736			22	GLUCOSE1PMETAB.PWY..glucose.and.glucose.1.phosphate.degradation	Days_since_visit1	Days_since_visit1	1.72241e-05	2.75104e-05	121	22	0.532769	0.919024	0.848358			PWY0.1296..purine.ribonucleosides.degradation	DSC_all	not_DSC	1.96313e-06	3.53598e-05	35	17	0.956146	0.9897
	198	THRESYN.PWY..superpathway.of.L.threonine.biosynthesis	Cluster	Cluster3	-0.000733539	0.000175619	121	99	5.77936e-05	0.000271455	Cluster1	0.000361821			24	GLYCOLYSIS.E.D..superpathway.of.glycolysis.and.the.Entner.Doudoroff.pathway	Days_since_visit1	Days_since_visit1	2.65495e-06	2.84647e-06	121	24	0.35287	0.919024	0.810274			PWY0.1297..superpathway.of.purine.deoxyribonucleosides.degradation	DSC_all	not_DSC	-1.80755e-06	1.63729e-05	35	11	0.912955	0.9897
	199	PWY0.1298..superpathway.of.pyrimidine.deoxyribonucleosides.degradation	Cluster	Cluster5	6.34501e-05	1.53389e-05	121	45	7.20787e-05	0.00033685	Cluster1	0.000445304			26	GLYCOLYSIS..glycolysis.I..from.glucose.6.phosphate.	Days_since_visit1	Days_since_visit1	2.73138e-05	3.30176e-05	121	84	0.410259	0.919024	0.827128			PWY66.429..fatty.acid.biosynthesis.initiation..mitochondria.	DSC_all	not_DSC	-3.08038e-06	5.13111e-05	35	19	0.952491	0.9897
	200	GLCMANNANAUT.PWY..superpathway.of.N.acetylglucosamine..N.acetylmannosamine.and.N.acetylneuraminate.degradation	Cluster	Cluster6	-0.000609202	0.000146469	121	72	7.76151e-05	0.00036091	Cluster1	0.000475329			28	HEME.BIOSYNTHESIS.II..heme.b.biosynthesis.I..aerobic.	Days_since_visit1	Days_since_visit1	2.67175e-06	2.95837e-06	121	33	0.368832	0.919024	0.810274			PWY.5130..2.oxobutanoate.degradation.I	DSC_all	not_DSC	1.26028e-08	8.71751e-07	35	6	0.989956	0.989956
	201	PWY.1269..CMP.3.deoxy.D.manno.octulosonate.biosynthesis	Cluster	Cluster5	6.70003e-05	1.64695e-05	121	46	8.72938e-05	0.000401897	Cluster1	0.000528842			30	HEMESYN2.PWY..heme.b.biosynthesis.II..oxygen.independent.	Days_since_visit1	Days_since_visit1	4.4229e-06	3.60698e-06	121	32	0.223284	0.919024	0.745766
	202	PWY.7117..C4.photosynthetic.carbon.assimilation.cycle..PEPCK.type	Cluster	Cluster4	0.00010184	2.45743e-05	121	43	8.69747e-05	0.000401897	Cluster1	0.000528842			32	HISDEG.PWY..L.histidine.degradation.I	Days_since_visit1	Days_since_visit1	-1.86745e-05	9.63558e-06	121	46	0.0555465	0.919024	0.68736
	203	FASYN.ELONG.PWY..fatty.acid.elongation....saturated	Cluster	Cluster6	7.37062e-05	1.78723e-05	121	16	8.94222e-05	0.000409668	Cluster1	0.000540572			34	HSERMETANA.PWY..L.methionine.biosynthesis.III	Days_since_visit1	Days_since_visit1	-1.25652e-05	1.33989e-05	121	60	0.350811	0.919024	0.810274
	204	PWY0.162..superpathway.of.pyrimidine.ribonucleotides.de.novo.biosynthesis	Cluster	Cluster5	0.000262662	6.49294e-05	121	62	9.56206e-05	0.000435918	Cluster1	0.000570678			36	LACTOSECAT.PWY..lactose.and.galactose.degradation.I	Days_since_visit1	Days_since_visit1	4.47225e-05	6.93232e-05	121	75	0.520448	0.919024	0.848358
	205	THISYNARA.PWY..superpathway.of.thiamine.diphosphate.biosynthesis.III..eukaryotes.	Cluster	Cluster5	0.000167705	4.13806e-05	121	57	9.90021e-05	0.000449132	Cluster1	0.000589128			37	NAGLIPASYN.PWY..lipid.IVA.biosynthesis..E..coli.	Days_since_visit1	Days_since_visit1	-1.4546e-05	9.09498e-06	121	43	0.113052	0.919024	0.68736
	206	PYRIDNUCSYN.PWY..NAD.de.novo.biosynthesis.I..from.aspartate.	Cluster	Cluster4	0.000178174	4.36705e-05	121	57	0.000101238	0.000457047	Cluster1	0.000599118			39	NONMEVIPP.PWY..methylerythritol.phosphate.pathway.I	Days_since_visit1	Days_since_visit1	-2.09604e-05	2.59832e-05	121	60	0.421926	0.919024	0.827128
	207	PWY.5005..biotin.biosynthesis.II	Cluster	Cluster4	2.25733e-05	5.58853e-06	121	25	0.00011194	0.000502917	Cluster1	0.000654184			41	P124.PWY..Bifidobacterium.shunt	Days_since_visit1	Days_since_visit1	-3.92535e-05	2.5208e-05	121	58	0.122898	0.919024	0.710902
	208	PWY.7115..C4.photosynthetic.carbon.assimilation.cycle..NAD.ME.type	Cluster	Cluster4	3.01319e-05	7.29144e-06	121	42	0.000116111	0.000519151	Cluster1	0.000677154			44	P42.PWY..incomplete.reductive.TCA.cycle	Days_since_visit1	Days_since_visit1	-2.80309e-06	2.47456e-06	121	24	0.260206	0.919024	0.767309
	209	UDPNAGSYN.PWY..UDP.N.acetyl.D.glucosamine.biosynthesis.I	Cluster	Cluster6	-0.00108768	0.000267752	121	118	0.000117405	0.000522425	Cluster1	0.000683283			46	P461.PWY..hexitol.fermentation.to.lactate..formate..ethanol.and.acetate	Days_since_visit1	Days_since_visit1	1.91869e-06	2.0502e-06	121	16	0.352351	0.919024	0.810274
	210	PWY.6608..guanosine.nucleotides.degradation.III	Cluster	Cluster4	0.000124133	3.1195e-05	121	52	0.000141483	0.000626566	Cluster1	0.000814975			48	PANTOSYN.PWY..superpathway.of.coenzyme.A.biosynthesis.I..bacteria.	Days_since_visit1	Days_since_visit1	-2.26386e-05	1.9757e-05	121	57	0.254839	0.919024	0.767309
	211	PWY.7664..oleate.biosynthesis.IV..anaerobic.	Cluster	Cluster6	6.8091e-05	1.70609e-05	121	16	0.000144067	0.000634986	Cluster1	0.000828163			51	POLYAMINSYN3.PWY..superpathway.of.polyamine.biosynthesis.II	Days_since_visit1	Days_since_visit1	-1.3097e-06	7.94791e-07	121	14	0.109278	0.919024	0.68736
	212	PWY.5188..tetrapyrrole.biosynthesis.I..from.glutamate.	Cluster	Cluster4	7.65176e-05	1.94777e-05	121	48	0.000148325	0.00065067	Cluster1	0.000850899			53	POLYISOPRENSYN.PWY..polyisoprenoid.biosynthesis..E..coli.	Days_since_visit1	Days_since_visit1	8.70405e-06	5.44336e-06	121	31	0.11329	0.919024	0.68736
	213	PWY.5659..GDP.mannose.biosynthesis	Cluster	Cluster4	9.71061e-05	2.48292e-05	121	48	0.000160073	0.000698909	Cluster1	0.000912706			55	PPGPPMET.PWY..ppGpp.metabolism	Days_since_visit1	Days_since_visit1	-4.55921e-06	2.16993e-06	121	26	0.0382902	0.919024	0.68736
	214	PWY.6151..S.adenosyl.L.methionine.salvage.I	Cluster	Cluster3	-0.00105251	0.000267207	121	107	0.000167314	0.000727112	Cluster1	0.000946317			56	PWY.1042..glycolysis.IV	Days_since_visit1	Days_since_visit1	-2.38417e-05	2.92653e-05	121	93	0.417383	0.919024	0.827128
	215	NONOXIPENT.PWY..pentose.phosphate.pathway..non.oxidative.branch..I	Cluster	Cluster4	0.000198737	5.15234e-05	121	61	0.000195859	0.000847205	Cluster1	0.00109238			57	PWY.241..C4.photosynthetic.carbon.assimilation.cycle..NADP.ME.type	Days_since_visit1	Days_since_visit1	-1.83028e-05	9.08939e-06	121	49	0.0469272	0.919024	0.68736
	216	PWY0.1061..superpathway.of.L.alanine.biosynthesis	Cluster	Cluster5	0.000304918	7.9811e-05	121	67	0.000226053	0.000973282	Cluster1	0.00124351			59	PWY.2941..L.lysine.biosynthesis.II	Days_since_visit1	Days_since_visit1	-1.78814e-05	2.0795e-05	121	76	0.392126	0.919024	0.819499
	217	PWY.5686..UMP.biosynthesis.I	Cluster	Cluster6	-0.00117309	0.000304636	121	116	0.000227647	0.000975632	Cluster1	0.00124984			61	PWY.2942..L.lysine.biosynthesis.III	Days_since_visit1	Days_since_visit1	-1.97158e-05	2.45872e-05	121	92	0.424726	0.919024	0.827128
	218	P161.PWY..acetylene.degradation..anaerobic.	Cluster	Cluster6	-0.000260031	6.75609e-05	121	75	0.000229163	0.00097762	Cluster1	0.00125193			64	PWY.4041...gamma..glutamyl.cycle	Days_since_visit1	Days_since_visit1	-5.37874e-06	6.9082e-06	121	48	0.438184	0.919024	0.827128
	219	PWY.6282..palmitoleate.biosynthesis.I..from..5Z..dodec.5.enoate.	Cluster	Cluster6	6.20182e-05	1.62481e-05	121	16	0.000264362	0.00112263	Cluster1	0.00142088			66	PWY.4984..urea.cycle	Days_since_visit1	Days_since_visit1	-8.49791e-07	1.15819e-06	121	21	0.463119	0.919024	0.835456
	220	PWY.5686..UMP.biosynthesis.I	Cluster	Cluster4	0.000462735	0.000120483	121	116	0.000268991	0.0011371	Cluster1	0.00144025			68	PWY.5030..L.histidine.degradation.III	Days_since_visit1	Days_since_visit1	-1.49758e-05	7.7006e-06	121	42	0.0547937	0.919024	0.68736
	221	PWY0.1298..superpathway.of.pyrimidine.deoxyribonucleosides.degradation	Cluster	Cluster4	4.73278e-05	1.24787e-05	121	45	0.000278638	0.00117255	Cluster1	0.00148907			72	PWY.5121..superpathway.of.geranylgeranyl.diphosphate.biosynthesis.II..via.MEP.	Days_since_visit1	Days_since_visit1	8.67124e-06	6.18337e-06	121	24	0.164182	0.919024	0.710902
	222	PWY.7791..UMP.biosynthesis.III	Cluster	Cluster6	-0.0010868	0.000286086	121	116	0.000290686	0.00121774	Cluster1	0.00155051			73	PWY.5130..2.oxobutanoate.degradation.I	Days_since_visit1	Days_since_visit1	-4.10444e-06	2.05086e-06	121	24	0.0481664	0.919024	0.68736
	223	PWY.7790..UMP.biosynthesis.II	Cluster	Cluster6	-0.00108588	0.00028616	121	116	0.000295043	0.00123045	Cluster1	0.00157077			75	PWY.5188..tetrapyrrole.biosynthesis.I..from.glutamate.	Days_since_visit1	Days_since_visit1	4.24224e-06	5.88714e-06	121	48	0.473004	0.919024	0.83716
	224	VALSYN.PWY..L.valine.biosynthesis	Cluster	Cluster4	0.000116793	3.10742e-05	121	57	0.000312302	0.00129661	Cluster1	0.00165326			77	PWY.5189..tetrapyrrole.biosynthesis.II..from.glycine.	Days_since_visit1	Days_since_visit1	3.75578e-06	4.7606e-06	121	45	0.432201	0.919024	0.827128
	225	PWY66.429..fatty.acid.biosynthesis.initiation..mitochondria.	Cluster	Cluster6	-0.000707356	0.000188706	121	81	0.000326041	0.00134764	Cluster1	0.00172275			79	PWY.5265..peptidoglycan.biosynthesis.II..staphylococci.	Days_since_visit1	Days_since_visit1	-2.62255e-05	2.36413e-05	121	59	0.270213	0.919024	0.767309
	226	PWY.6527..stachyose.degradation	Cluster	Cluster4	-0.000216857	5.85243e-05	121	69	0.000329696	0.00135339	Cluster1	0.00173879			80	PWY.5367..petroselinate.biosynthesis	Days_since_visit1	Days_since_visit1	-1.90784e-05	1.57816e-05	121	44	0.22977	0.919024	0.745766
	227	PWY.7208..superpathway.of.pyrimidine.nucleobases.salvage	Cluster	Cluster4	0.000150322	4.04914e-05	121	80	0.000330342	0.00135339	Cluster1	0.00173894			82	PWY.5384..sucrose.degradation.IV..sucrose.phosphorylase.	Days_since_visit1	Days_since_visit1	6.06368e-05	2.71438e-05	121	58	0.0279197	0.919024	0.68736
	228	PWY.6609..adenine.and.adenosine.salvage.III	Cluster	Cluster4	0.000400536	0.000107209	121	65	0.000344533	0.00140533	Cluster1	0.00181025			83	PWY.5484..glycolysis.II..from.fructose.6.phosphate.	Days_since_visit1	Days_since_visit1	-1.44328e-05	1.88031e-05	121	58	0.444693	0.919024	0.827128
	229	COA.PWY.1..superpathway.of.coenzyme.A.biosynthesis.III..mammals.	Cluster	Cluster4	-0.000296473	7.93919e-05	121	108	0.000351576	0.0014278	Cluster1	0.0018438			84	PWY.5659..GDP.mannose.biosynthesis	Days_since_visit1	Days_since_visit1	-1.13622e-05	8.25649e-06	121	48	0.17209	0.919024	0.72747
	230	PWY.8178..pentose.phosphate.pathway..non.oxidative.branch..II	Cluster	Cluster4	0.000161887	4.41251e-05	121	58	0.000382506	0.00154665	Cluster1	0.00199346			85	PWY.5667..CDP.diacylglycerol.biosynthesis.I	Days_since_visit1	Days_since_visit1	5.13424e-05	5.06719e-05	121	92	0.313595	0.919024	0.777716
	231	ANAEROFRUCAT.PWY..homolactic.fermentation	Cluster	Cluster4	0.000170307	4.65039e-05	121	54	0.000449627	0.00181019	Cluster1	0.00231484			86	PWY.5676..acetyl.CoA.fermentation.to.butanoate.II	Days_since_visit1	Days_since_visit1	-3.04608e-06	3.42163e-06	121	16	0.375645	0.919024	0.810274
	232	PWY.7328..superpathway.of.UDP.glucose.derived.O.antigen.building.blocks.biosynthesis	Cluster	Cluster4	5.9767e-05	1.6258e-05	121	45	0.00045435	0.00182132	Cluster1	0.00233488			87	PWY.5695..inosine.5..phosphate.degradation	Days_since_visit1	Days_since_visit1	-3.55184e-05	2.69892e-05	121	63	0.191381	0.919024	0.745766
	233	PWY.5189..tetrapyrrole.biosynthesis.II..from.glycine.	Cluster	Cluster4	5.65856e-05	1.57907e-05	121	45	0.000503195	0.00200846	Cluster1	0.00255783			89	PWY.5913..partial.TCA.cycle..obligate.autotrophs.	Days_since_visit1	Days_since_visit1	8.22283e-06	6.71013e-06	121	28	0.223585	0.919024	0.745766
	234	ILEUSYN.PWY..L.isoleucine.biosynthesis.I..from.threonine.	Cluster	Cluster4	0.000103678	2.87391e-05	121	52	0.000526393	0.00209208	Cluster1	0.00267092			91	PWY.5918..superpathway.of.heme.b.biosynthesis.from.glutamate	Days_since_visit1	Days_since_visit1	4.49118e-06	4.09809e-06	121	29	0.275984	0.919024	0.767309
	235	PWY.3841..folate.transformations.II..plants.	Cluster	Cluster5	-0.000329424	9.22999e-05	121	107	0.00056852	0.00224989	Cluster1	0.002864			93	PWY.5941..glycogen.degradation.II	Days_since_visit1	Days_since_visit1	-7.34118e-05	7.13143e-05	121	79	0.306011	0.919024	0.777716
	236	PWY.6151..S.adenosyl.L.methionine.salvage.I	Cluster	Cluster4	0.000313093	8.68137e-05	121	107	0.000610883	0.00240729	Cluster1	0.0030719			94	PWY.5973..cis.vaccenate.biosynthesis	Days_since_visit1	Days_since_visit1	-3.68654e-05	1.71996e-05	121	71	0.0346966	0.919024	0.68736
	237	PWY66.429..fatty.acid.biosynthesis.initiation..mitochondria.	Cluster	Cluster3	-0.000668767	0.000189737	121	81	0.00062189	0.00244033	Cluster1	0.00312166			96	PWY.5981..CDP.diacylglycerol.biosynthesis.III	Days_since_visit1	Days_since_visit1	-2.04228e-05	2.04624e-05	121	45	0.32081	0.919024	0.785141
	238	COLANSYN.PWY..colanic.acid.building.blocks.biosynthesis	Cluster	Cluster4	7.20055e-05	2.04041e-05	121	41	0.000624564	0.00244052	Cluster1	0.0031295			98	PWY.6121..5.aminoimidazole.ribonucleotide.biosynthesis.I	Days_since_visit1	Days_since_visit1	-3.38583e-05	5.03422e-05	121	77	0.502925	0.919024	0.84274
	239	PWY.5103..L.isoleucine.biosynthesis.III	Cluster	Cluster4	9.30955e-05	2.62296e-05	121	52	0.000636685	0.00247748	Cluster1	0.00318456			99	PWY.6125..superpathway.of.guanosine.nucleotides.de.novo.biosynthesis.II	Days_since_visit1	Days_since_visit1	1.22077e-05	1.02463e-05	121	70	0.23656	0.919024	0.745766
	240	HISDEG.PWY..L.histidine.degradation.I	Cluster	Cluster5	0.000119031	3.37687e-05	121	46	0.000641018	0.00248395	Cluster1	0.00319059			101	PWY.6126..superpathway.of.adenosine.nucleotides.de.novo.biosynthesis.II	Days_since_visit1	Days_since_visit1	2.35588e-05	1.47872e-05	121	75	0.11456	0.919024	0.68736
	241	PWY.5030..L.histidine.degradation.III	Cluster	Cluster5	0.000103689	2.95732e-05	121	42	0.000655265	0.00252862	Cluster1	0.00324859			103	PWY.6147..6.hydroxymethyl.dihydropterin.diphosphate.biosynthesis.I	Days_since_visit1	Days_since_visit1	4.60373e-05	4.87105e-05	121	89	0.347079	0.919024	0.810274
	242	THISYNARA.PWY..superpathway.of.thiamine.diphosphate.biosynthesis.III..eukaryotes.	Cluster	Cluster4	0.000118982	3.36535e-05	121	57	0.000670315	0.00257601	Cluster1	0.00331735			104	PWY.6151..S.adenosyl.L.methionine.salvage.I	Days_since_visit1	Days_since_visit1	-6.60498e-05	4.12671e-05	121	107	0.11301	0.919024	0.68736
	243	BRANCHED.CHAIN.AA.SYN.PWY..superpathway.of.branched.chain.amino.acid.biosynthesis	Cluster	Cluster4	9.41687e-05	2.65169e-05	121	45	0.000679206	0.00259943	Cluster1	0.00335544			106	PWY.6163..chorismate.biosynthesis.from.3.dehydroquinate	Days_since_visit1	Days_since_visit1	-3.86523e-05	3.79305e-05	121	65	0.310872	0.919024	0.777716
	244	PWY.5981..CDP.diacylglycerol.biosynthesis.III	Cluster	Cluster4	-0.000191845	5.3957e-05	121	45	0.000685362	0.00261224	Cluster1	0.003374			108	PWY.6270..isoprene.biosynthesis.I	Days_since_visit1	Days_since_visit1	-2.2022e-05	1.83443e-05	121	56	0.233048	0.919024	0.745766
	245	PWY.5367..petroselinate.biosynthesis	Cluster	Cluster5	-0.000194853	5.57061e-05	121	44	0.000701119	0.00266139	Cluster1	0.00343952			110	PWY.6305..superpathway.of.putrescine.biosynthesis	Days_since_visit1	Days_since_visit1	4.98696e-07	8.08542e-07	121	33	0.54509	0.919024	0.848358
	246	ANAEROFRUCAT.PWY..homolactic.fermentation	Cluster	Cluster5	0.000200263	5.73321e-05	121	54	0.000713156	0.00269608	Cluster1	0.00349248			112	PWY.6317..D.galactose.degradation.I..Leloir.pathway.	Days_since_visit1	Days_since_visit1	1.94839e-05	2.84227e-05	121	102	0.494771	0.919024	0.83716
	247	PWY.7790..UMP.biosynthesis.II	Cluster	Cluster3	-0.00115592	0.000333654	121	116	0.00075861	0.00284479	Cluster1	0.00367664			114	PWY.6385..peptidoglycan.biosynthesis.III..mycobacteria.	Days_since_visit1	Days_since_visit1	-4.02662e-05	3.74098e-05	121	73	0.284617	0.919024	0.767309
	248	PWY.7791..UMP.biosynthesis.III	Cluster	Cluster3	-0.00115675	0.000333777	121	116	0.000755928	0.00284479	Cluster1	0.00367079			116	PWY.6387..UDP.N.acetylmuramoyl.pentapeptide.biosynthesis.I..meso.diaminopimelate.containing.	Days_since_visit1	Days_since_visit1	2.35241e-05	3.85577e-05	121	118	0.543388	0.919024	0.848358
	249	PWY.6527..stachyose.degradation	Cluster	Cluster3	-0.000575397	0.000166656	121	69	0.000779385	0.00291096	Cluster1	0.00376435			118	PWY.6606..guanosine.nucleotides.degradation.II	Days_since_visit1	Days_since_visit1	-8.01528e-06	4.83461e-06	121	14	0.0999946	0.919024	0.68736
	250	PWY0.1297..superpathway.of.purine.deoxyribonucleosides.degradation	Cluster	Cluster5	6.37817e-05	1.84786e-05	121	40	0.000802962	0.00298702	Cluster1	0.00386494			119	PWY.6608..guanosine.nucleotides.degradation.III	Days_since_visit1	Days_since_visit1	-1.04072e-05	1.12915e-05	121	52	0.359035	0.919024	0.810274
	251	TRNA.CHARGING.PWY..tRNA.charging	Cluster	Cluster6	-0.00111693	0.00032486	121	115	0.000816294	0.00302452	Cluster1	0.0039157			121	PWY.6609..adenine.and.adenosine.salvage.III	Days_since_visit1	Days_since_visit1	-4.08949e-05	3.94255e-05	121	65	0.302256	0.919024	0.777716
	252	PWY.6609..adenine.and.adenosine.salvage.III	Cluster	Cluster5	0.000453424	0.000131646	121	65	0.000832434	0.00307208	Cluster1	0.00396553			123	PWY.6628..superpathway.of.L.phenylalanine.biosynthesis	Days_since_visit1	Days_since_visit1	8.96759e-06	1.25823e-05	121	46	0.477837	0.919024	0.83716
	253	NAGLIPASYN.PWY..lipid.IVA.biosynthesis..E..coli.	Cluster	Cluster5	0.000112861	3.28666e-05	121	43	0.000844383	0.00307952	Cluster1	0.00399589			126	PWY.6700..queuosine.biosynthesis.I..de.novo.	Days_since_visit1	Days_since_visit1	-3.06727e-05	2.09353e-05	121	59	0.146317	0.919024	0.710902
	254	PWY.8073..lipid.IVA.biosynthesis..P..putida.	Cluster	Cluster5	0.000112861	3.28666e-05	121	43	0.000844383	0.00307952	Cluster1	0.00399589			127	PWY.6703..preQ0.biosynthesis	Days_since_visit1	Days_since_visit1	-9.41853e-06	1.22324e-05	121	56	0.443276	0.919024	0.827128
	255	PWY66.409..superpathway.of.purine.nucleotide.salvage	Cluster	Cluster5	9.34167e-05	2.72357e-05	121	33	0.000840269	0.00307952	Cluster1	0.00398986			128	PWY.6823..molybdopterin.biosynthesis	Days_since_visit1	Days_since_visit1	-8.00511e-06	5.56446e-06	121	50	0.15361	0.919024	0.710902
	256	PWY.7357..thiamine.phosphate.formation.from.pyrithiamine.and.oxythiamine..yeast.	Cluster	Cluster5	0.000256373	7.44825e-05	121	65	0.00088772	0.00322492	Cluster1	0.00417987			129	PWY.6859..all.trans.farnesol.biosynthesis	Days_since_visit1	Days_since_visit1	5.01286e-06	3.10112e-06	121	17	0.109424	0.919024	0.68736
	257	PWY.3001..superpathway.of.L.isoleucine.biosynthesis.I	Cluster	Cluster5	0.00012136	3.54417e-05	121	43	0.000927587	0.00335664	Cluster1	0.00436028			132	PWY.6901..superpathway.of.glucose.and.xylose.degradation	Days_since_visit1	Days_since_visit1	-4.25529e-06	4.81425e-06	121	32	0.378999	0.919024	0.810274
	258	PWY.5384..sucrose.degradation.IV..sucrose.phosphorylase.	Cluster	Cluster4	-0.000206575	6.16645e-05	121	58	0.00116855	0.00421222	Cluster1	0.0053761			133	PWY.6902..chitin.degradation.II..Vibrio.	Days_since_visit1	Days_since_visit1	-2.78081e-06	2.15062e-06	121	16	0.198527	0.919024	0.745766
	259	PEPTIDOGLYCANSYN.PWY..peptidoglycan.biosynthesis.I..meso.diaminopimelate.containing.	Cluster	Cluster4	0.00033407	9.98346e-05	121	117	0.00118547	0.00425669	Cluster1	0.00543612			135	PWY.702..L.methionine.biosynthesis.II	Days_since_visit1	Days_since_visit1	2.41306e-05	1.27012e-05	121	16	0.0604905	0.919024	0.68736
	260	PWY.6823..molybdopterin.biosynthesis	Cluster	Cluster4	4.92522e-05	1.46272e-05	121	50	0.00121685	0.00435259	Cluster1	0.0055619			139	PWY.7117..C4.photosynthetic.carbon.assimilation.cycle..PEPCK.type	Days_since_visit1	Days_since_visit1	-9.73757e-06	8.96028e-06	121	43	0.280038	0.919024	0.767309
	261	GLYCOLYSIS.E.D..superpathway.of.glycolysis.and.the.Entner.Doudoroff.pathway	Cluster	Cluster5	2.9428e-05	8.91677e-06	121	24	0.00128652	0.00458415	Cluster1	0.00584155			140	PWY.7184..pyrimidine.deoxyribonucleotides.de.novo.biosynthesis.I	Days_since_visit1	Days_since_visit1	8.95957e-06	5.41161e-06	121	21	0.101195	0.919024	0.68736
	262	PWY.7111..pyruvate.fermentation.to.isobutanol..engineered.	Cluster	Cluster4	8.61734e-05	2.59621e-05	121	52	0.00134718	0.0047638	Cluster1	0.00605908			142	PWY.7197..pyrimidine.deoxyribonucleotide.phosphorylation	Days_since_visit1	Days_since_visit1	1.46344e-05	1.622e-05	121	76	0.369275	0.919024	0.810274
	263	PWY0.1586..peptidoglycan.maturation..meso.diaminopimelate.containing.	Cluster	Cluster6	0.000335785	0.000100833	121	69	0.00134218	0.0047638	Cluster1	0.00604628			143	PWY.7198..pyrimidine.deoxyribonucleotides.de.novo.biosynthesis.IV	Days_since_visit1	Days_since_visit1	1.04108e-05	9.28947e-06	121	69	0.265357	0.919024	0.767309
	264	PHOSLIPSYN.PWY..superpathway.of.phospholipid.biosynthesis.I..bacteria.	Cluster	Cluster4	5.79212e-05	1.76227e-05	121	42	0.00138603	0.00488262	Cluster1	0.00619418			146	PWY.7208..superpathway.of.pyrimidine.nucleobases.salvage	Days_since_visit1	Days_since_visit1	1.28572e-05	1.87623e-05	121	80	0.494906	0.919024	0.83716
	265	PWY.5686..UMP.biosynthesis.I	Cluster	Cluster3	-0.00121218	0.000368073	121	116	0.00141197	0.00495521	Cluster1	0.00629009			147	PWY.7210..pyrimidine.deoxyribonucleotides.biosynthesis.from.CTP	Days_since_visit1	Days_since_visit1	1.0968e-05	5.93933e-06	121	17	0.0680066	0.919024	0.68736
	266	PWY.7117..C4.photosynthetic.carbon.assimilation.cycle..PEPCK.type	Cluster	Cluster5	9.9458e-05	3.04e-05	121	43	0.00147728	0.00516492	Cluster1	0.00656024			148	PWY.7220..adenosine.deoxyribonucleotides.de.novo.biosynthesis.II	Days_since_visit1	Days_since_visit1	1.1322e-05	7.92467e-06	121	75	0.156473	0.919024	0.710902
	267	PWY.8004..Entner.Doudoroff.pathway.I	Cluster	Cluster5	2.39875e-05	7.37387e-06	121	24	0.00149908	0.00522152	Cluster1	0.00664656			150	PWY.7221..guanosine.ribonucleotides.de.novo.biosynthesis	Days_since_visit1	Days_since_visit1	-0.000111988	6.29432e-05	121	112	0.0785645	0.919024	0.68736
	268	PWY.6386..UDP.N.acetylmuramoyl.pentapeptide.biosynthesis.II..lysine.containing.	Cluster	Cluster6	-0.000832175	0.000255882	121	117	0.00174525	0.00605628	Cluster1	0.00764159			151	PWY.7222..guanosine.deoxyribonucleotides.de.novo.biosynthesis.II	Days_since_visit1	Days_since_visit1	1.1322e-05	7.92467e-06	121	75	0.156473	0.919024	0.710902
	269	P42.PWY..incomplete.reductive.TCA.cycle	Cluster	Cluster5	3.03415e-05	9.46257e-06	121	24	0.00176094	0.00608801	Cluster1	0.00769829			153	PWY.7228..superpathway.of.guanosine.nucleotides.de.novo.biosynthesis.I	Days_since_visit1	Days_since_visit1	1.85207e-05	1.25874e-05	121	75	0.144613	0.919024	0.710902
	270	PWY.5030..L.histidine.degradation.III	Cluster	Cluster4	7.84618e-05	2.45699e-05	121	42	0.00187778	0.0064679	Cluster1	0.00814573			155	PWY.7229..superpathway.of.adenosine.nucleotides.de.novo.biosynthesis.I	Days_since_visit1	Days_since_visit1	3.56867e-05	2.14069e-05	121	75	0.0989242	0.919024	0.68736
	271	PWY.5005..biotin.biosynthesis.II	Cluster	Cluster5	2.14624e-05	6.79279e-06	121	25	0.00205223	0.00704272	Cluster1	0.00882428			157	PWY.7238..sucrose.biosynthesis.II	Days_since_visit1	Days_since_visit1	-7.61652e-05	8.80859e-05	121	79	0.389489	0.919024	0.819499
	272	PWY.6588..pyruvate.fermentation.to.acetone	Cluster	Cluster5	1.45586e-05	4.72454e-06	121	21	0.00208208	0.00711888	Cluster1	0.00893546			159	PWY.7282..4.amino.2.methyl.5.diphosphomethylpyrimidine.biosynthesis.II	Days_since_visit1	Days_since_visit1	-1.01065e-05	6.01468e-06	121	33	0.0961942	0.919024	0.68736
	273	X1CMET2.PWY..folate.transformations.III..E..coli.	Cluster	Cluster5	4.57278e-05	1.45003e-05	121	20	0.00225665	0.00768751	Cluster1	0.00962588			161	PWY.7323..superpathway.of.GDP.mannose.derived.O.antigen.building.blocks.biosynthesis	Days_since_visit1	Days_since_visit1	-4.52807e-06	3.05477e-06	121	27	0.141574	0.919024	0.710902
	274	GLUCOSE1PMETAB.PWY..glucose.and.glucose.1.phosphate.degradation	Cluster	Cluster4	0.000236329	7.55595e-05	121	22	0.00252615	0.00857417	Cluster1	0.0106782			163	PWY.7328..superpathway.of.UDP.glucose.derived.O.antigen.building.blocks.biosynthesis	Days_since_visit1	Days_since_visit1	-1.48027e-05	6.4093e-06	121	45	0.0230998	0.919024	0.68736
	275	PWY.6125..superpathway.of.guanosine.nucleotides.de.novo.biosynthesis.II	Cluster	Cluster5	0.000117134	3.79848e-05	121	70	0.00261375	0.00883924	Cluster1	0.0110252			164	PWY.7345..superpathway.of.anaerobic.sucrose.degradation	Days_since_visit1	Days_since_visit1	-6.60398e-06	8.39501e-06	121	23	0.43306	0.919024	0.827128
	276	PWY.7229..superpathway.of.adenosine.nucleotides.de.novo.biosynthesis.I	Cluster	Cluster4	0.000202065	6.54753e-05	121	75	0.00271701	0.00915515	Cluster1	0.0114334			166	PWY.7356..thiamine.diphosphate.salvage.IV..yeast.	Days_since_visit1	Days_since_visit1	-5.73829e-06	7.2316e-06	121	21	0.429487	0.919024	0.827128
	277	PWY.6901..superpathway.of.glucose.and.xylose.degradation	Cluster	Cluster5	5.45611e-05	1.78324e-05	121	32	0.00278278	0.00934291	Cluster1	0.0116752			168	PWY.7383..anaerobic.energy.metabolism..invertebrates..cytosol.	Days_since_visit1	Days_since_visit1	3.86661e-06	4.31685e-06	121	26	0.372726	0.919024	0.810274
	278	PWY.1042..glycolysis.IV	Cluster	Cluster2	-0.000299289	9.7991e-05	121	93	0.00280427	0.00938118	Cluster1	0.0117437			169	PWY.7392..taxadiene.biosynthesis..engineered.	Days_since_visit1	Days_since_visit1	8.56039e-06	5.17154e-06	121	15	0.101283	0.919024	0.68736
	279	PWY.7228..superpathway.of.guanosine.nucleotides.de.novo.biosynthesis.I	Cluster	Cluster5	0.000142953	4.68373e-05	121	75	0.0028795	0.00959834	Cluster1	0.0119561			171	PWY.7560..methylerythritol.phosphate.pathway.II	Days_since_visit1	Days_since_visit1	-2.12552e-05	1.76478e-05	121	56	0.231535	0.919024	0.745766
	280	ASPASN.PWY..superpathway.of.L.aspartate.and.L.asparagine.biosynthesis	Cluster	Cluster4	9.94776e-05	3.24207e-05	121	67	0.00290602	0.00965215	Cluster1	0.0119992			172	PWY.7663..gondoate.biosynthesis..anaerobic.	Days_since_visit1	Days_since_visit1	-1.20432e-05	1.09565e-05	121	57	0.274564	0.919024	0.767309
	281	PWY.5973..cis.vaccenate.biosynthesis	Cluster	Cluster2	-0.00019096	6.28133e-05	121	71	0.00304036	0.0100624	Cluster1	0.0125131			175	PWY.7790..UMP.biosynthesis.II	Days_since_visit1	Days_since_visit1	3.5976e-05	5.24162e-05	121	116	0.494282	0.919024	0.83716
	282	PEPTIDOGLYCANSYN.PWY..peptidoglycan.biosynthesis.I..meso.diaminopimelate.containing.	Cluster	Cluster6	-0.000775117	0.00025341	121	117	0.00311991	0.0102891	Cluster1	0.0127657			177	PWY.7791..UMP.biosynthesis.III	Days_since_visit1	Days_since_visit1	3.59328e-05	5.24523e-05	121	116	0.495095	0.919024	0.83716
	283	PWY.4041...gamma..glutamyl.cycle	Cluster	Cluster6	0.000129996	4.28717e-05	121	48	0.00317607	0.0104372	Cluster1	0.0129766			179	PWY.7851..coenzyme.A.biosynthesis.II..eukaryotic.	Days_since_visit1	Days_since_visit1	3.58495e-05	2.82285e-05	121	117	0.207465	0.919024	0.745766
	284	GLYCOLYSIS..glycolysis.I..from.glucose.6.phosphate.	Cluster	Cluster4	-0.000287679	9.53953e-05	121	84	0.003241	0.0106131	Cluster1	0.0132227			181	PWY.7977..L.methionine.biosynthesis.IV	Days_since_visit1	Days_since_visit1	-5.80243e-06	3.21857e-06	121	19	0.0747264	0.919024	0.68736
	285	P124.PWY..Bifidobacterium.shunt	Cluster	Cluster5	0.00025914	8.6459e-05	121	58	0.0033386	0.0108944	Cluster1	0.0135908			183	PWY.8004..Entner.Doudoroff.pathway.I	Days_since_visit1	Days_since_visit1	2.2314e-06	2.35098e-06	121	24	0.344492	0.919024	0.810274
	286	PWY.5484..glycolysis.II..from.fructose.6.phosphate.	Cluster	Cluster4	0.000164902	5.52203e-05	121	58	0.00354544	0.0115289	Cluster1	0.0143606			185	PWY.8073..lipid.IVA.biosynthesis..P..putida.	Days_since_visit1	Days_since_visit1	-1.4546e-05	9.09498e-06	121	43	0.113052	0.919024	0.68736
	287	PWY.5384..sucrose.degradation.IV..sucrose.phosphorylase.	Cluster	Cluster5	-0.000221807	7.46675e-05	121	58	0.00365765	0.0118523	Cluster1	0.0147938			187	PWY.8187..L.arginine.degradation.XIII..reductive.Stickland.reaction.	Days_since_visit1	Days_since_visit1	-1.38184e-05	2.21203e-05	121	69	0.533719	0.919024	0.848358
	288	PWY.7220..adenosine.deoxyribonucleotides.de.novo.biosynthesis.II	Cluster	Cluster5	8.80728e-05	2.96443e-05	121	75	0.00369265	0.0118829	Cluster1	0.0148286			189	PWY.922..mevalonate.pathway.I..eukaryotes.and.bacteria.	Days_since_visit1	Days_since_visit1	6.7487e-05	5.27372e-05	121	66	0.203865	0.919024	0.745766
	289	PWY.7222..guanosine.deoxyribonucleotides.de.novo.biosynthesis.II	Cluster	Cluster5	8.80728e-05	2.96443e-05	121	75	0.00369265	0.0118829	Cluster1	0.0148286			190	PWY.I9..L.cysteine.biosynthesis.VI..from.L.methionine.	Days_since_visit1	Days_since_visit1	2.35718e-05	1.30744e-05	121	17	0.0746129	0.919024	0.68736
	290	PWY.6126..superpathway.of.adenosine.nucleotides.de.novo.biosynthesis.II	Cluster	Cluster5	0.000163641	5.54346e-05	121	75	0.00389616	0.0124946	Cluster1	0.015557			193	PWY0.1298..superpathway.of.pyrimidine.deoxyribonucleosides.degradation	Days_since_visit1	Days_since_visit1	-2.93587e-06	4.41728e-06	121	45	0.507925	0.919024	0.843518
	291	FERMENTATION.PWY..mixed.acid.fermentation	Cluster	Cluster6	0.000121552	4.11354e-05	121	29	0.00411539	0.0131523	Cluster1	0.0163858			194	PWY0.1319..CDP.diacylglycerol.biosynthesis.II	Days_since_visit1	Days_since_visit1	5.26649e-05	5.06221e-05	121	93	0.300891	0.919024	0.777716
	292	PWY.5484..glycolysis.II..from.fructose.6.phosphate.	Cluster	Cluster5	0.000193525	6.62209e-05	121	58	0.00419955	0.0133753	Cluster1	0.0166868			196	PWY0.1586..peptidoglycan.maturation..meso.diaminopimelate.containing.	Days_since_visit1	Days_since_visit1	-2.74224e-05	1.5387e-05	121	69	0.078042	0.919024	0.68736
	293	PWY.7229..superpathway.of.adenosine.nucleotides.de.novo.biosynthesis.I	Cluster	Cluster5	0.000233791	7.99201e-05	121	75	0.0042144	0.0133768	Cluster1	0.0166868			199	PWY0.301..L.ascorbate.degradation.I..bacterial..anaerobic.	Days_since_visit1	Days_since_visit1	1.10604e-05	5.3527e-06	121	28	0.0416007	0.919024	0.68736
	294	PWY.7221..guanosine.ribonucleotides.de.novo.biosynthesis	Cluster	Cluster6	-0.000982534	0.000334062	121	112	0.00430817	0.0136279	Cluster1	0.0170088			201	PWY0.845..superpathway.of.pyridoxal.5..phosphate.biosynthesis.and.salvage	Days_since_visit1	Days_since_visit1	-3.83639e-06	3.07138e-06	121	25	0.214821	0.919024	0.745766
	295	PWY.7228..superpathway.of.guanosine.nucleotides.de.novo.biosynthesis.I	Cluster	Cluster4	0.000112123	3.83261e-05	121	75	0.00439258	0.0138478	Cluster1	0.0173177			203	PWY4FS.7..phosphatidylglycerol.biosynthesis.I..plastidic.	Days_since_visit1	Days_since_visit1	7.25323e-06	9.93403e-06	121	52	0.467136	0.919024	0.835456
	296	NAGLIPASYN.PWY..lipid.IVA.biosynthesis..E..coli.	Cluster	Cluster4	7.88675e-05	2.70407e-05	121	43	0.00443799	0.0138967	Cluster1	0.0174478			205	PWY4FS.8..phosphatidylglycerol.biosynthesis.II..non.plastidic.	Days_since_visit1	Days_since_visit1	7.25322e-06	9.93403e-06	121	52	0.467136	0.919024	0.835456
	297	PWY.8073..lipid.IVA.biosynthesis..P..putida.	Cluster	Cluster4	7.88675e-05	2.70407e-05	121	43	0.00443799	0.0138967	Cluster1	0.0174478			207	PWY4LZ.257..superpathway.of.fermentation..Chlamydomonas.reinhardtii.	Days_since_visit1	Days_since_visit1	-3.78368e-06	2.69953e-06	121	16	0.164348	0.919024	0.710902
	298	PWY.6527..stachyose.degradation	Cluster	Cluster5	-0.000200147	6.9035e-05	121	69	0.00448218	0.013988	Cluster1	0.0175724			208	PWY66.389..phytol.degradation	Days_since_visit1	Days_since_visit1	-2.93452e-06	2.03626e-06	121	39	0.152828	0.919024	0.710902
	299	PWY.7198..pyrimidine.deoxyribonucleotides.de.novo.biosynthesis.IV	Cluster	Cluster5	9.86681e-05	3.401e-05	121	69	0.00453575	0.0141079	Cluster1	0.0177577			210	PWY66.409..superpathway.of.purine.nucleotide.salvage	Days_since_visit1	Days_since_visit1	8.36186e-06	6.69292e-06	121	33	0.214722	0.919024	0.745766
	300	PWY.7210..pyrimidine.deoxyribonucleotides.biosynthesis.from.CTP	Cluster	Cluster5	-6.26728e-05	2.15569e-05	121	17	0.0045632	0.0141459	Cluster1	0.0178403			213	PYRIDNUCSYN.PWY..NAD.de.novo.biosynthesis.I..from.aspartate.	Days_since_visit1	Days_since_visit1	-2.83882e-05	1.62201e-05	121	57	0.083391	0.919024	0.68736
	301	PWY0.301..L.ascorbate.degradation.I..bacterial..anaerobic.	Cluster	Cluster5	5.99658e-05	2.07227e-05	121	28	0.00464077	0.0143386	Cluster1	0.0181183			214	PYRIDOXSYN.PWY..pyridoxal.5..phosphate.biosynthesis.I	Days_since_visit1	Days_since_visit1	-3.74395e-06	2.47364e-06	121	26	0.133627	0.919024	0.710902
	302	PWY.7977..L.methionine.biosynthesis.IV	Cluster	Cluster5	2.98084e-05	1.04031e-05	121	19	0.00495433	0.0152567	Cluster1	0.0192091			215	RIBOSYN2.PWY..flavin.biosynthesis.I..bacteria.and.plants.	Days_since_visit1	Days_since_visit1	-8.78943e-06	1.35861e-05	121	70	0.51928	0.919024	0.848358
	303	PWY.922..mevalonate.pathway.I..eukaryotes.and.bacteria.	Cluster	Cluster5	-0.000238187	8.35138e-05	121	66	0.00515119	0.0158106	Cluster1	0.0198901			216	SER.GLYSYN.PWY..superpathway.of.L.serine.and.glycine.biosynthesis.I	Days_since_visit1	Days_since_visit1	-1.21503e-05	8.65755e-06	121	57	0.163887	0.919024	0.710902
	304	POLYISOPRENSYN.PWY..polyisoprenoid.biosynthesis..E..coli.	Cluster	Cluster4	4.80626e-05	1.67481e-05	121	31	0.00522695	0.0159904	Cluster1	0.020155			218	THRESYN.PWY..superpathway.of.L.threonine.biosynthesis	Days_since_visit1	Days_since_visit1	2.8632e-05	2.66327e-05	121	99	0.285193	0.919024	0.767309
	305	PWY.7197..pyrimidine.deoxyribonucleotide.phosphorylation	Cluster	Cluster5	7.77379e-05	2.72509e-05	121	76	0.00529794	0.0161544	Cluster1	0.0203172			220	UDPNAGSYN.PWY..UDP.N.acetyl.D.glucosamine.biosynthesis.I	Days_since_visit1	Days_since_visit1	6.15208e-05	4.94234e-05	121	118	0.216516	0.919024	0.745766
	306	PWY.922..mevalonate.pathway.I..eukaryotes.and.bacteria.	Cluster	Cluster4	-0.000185938	6.54591e-05	121	66	0.00532842	0.0161942	Cluster1	0.0204063			224	ANAEROFRUCAT.PWY..homolactic.fermentation	Days_since_visit1	Days_since_visit1	-9.82647e-06	1.73238e-05	121	54	0.571913	0.92518	0.848358
	307	PWY.6126..superpathway.of.adenosine.nucleotides.de.novo.biosynthesis.II	Cluster	Cluster4	0.00012948	4.53681e-05	121	75	0.00539999	0.0163052	Cluster1	0.0206242			225	PEPTIDOGLYCANSYN.PWY..peptidoglycan.biosynthesis.I..meso.diaminopimelate.containing.	Days_since_visit1	Days_since_visit1	2.12784e-05	3.74059e-05	121	117	0.570928	0.92518	0.848358
	308	PWY.7323..superpathway.of.GDP.mannose.derived.O.antigen.building.blocks.biosynthesis	Cluster	Cluster5	3.25802e-05	1.14674e-05	121	27	0.00538291	0.0163052	Cluster1	0.0205869			226	PWY.1269..CMP.3.deoxy.D.manno.octulosonate.biosynthesis	Days_since_visit1	Days_since_visit1	2.61258e-06	4.53311e-06	121	46	0.565816	0.92518	0.848358
	309	PWY.6125..superpathway.of.guanosine.nucleotides.de.novo.biosynthesis.II	Cluster	Cluster4	8.8701e-05	3.10939e-05	121	70	0.00542557	0.0163294	Cluster1	0.0206937			228	PWY.6124..inosine.5..phosphate.biosynthesis.II	Days_since_visit1	Days_since_visit1	-2.74046e-05	4.70852e-05	121	81	0.561986	0.92518	0.848358
	310	HISDEG.PWY..L.histidine.degradation.I	Cluster	Cluster4	7.78225e-05	2.72629e-05	121	46	0.00547581	0.0164274	Cluster1	0.020857			229	PWY.6588..pyruvate.fermentation.to.acetone	Days_since_visit1	Days_since_visit1	-8.17341e-07	1.38841e-06	121	21	0.556136	0.92518	0.848358
	311	PWY.7198..pyrimidine.deoxyribonucleotides.de.novo.biosynthesis.IV	Cluster	Cluster4	7.89916e-05	2.78115e-05	121	69	0.00563295	0.0168445	Cluster1	0.0213976			230	PWY.7234..inosine.5..phosphate.biosynthesis.III	Days_since_visit1	Days_since_visit1	-2.85093e-05	4.90887e-05	121	78	0.562827	0.92518	0.848358
	312	PPGPPMET.PWY..ppGpp.metabolism	Cluster	Cluster4	1.84056e-05	6.48008e-06	121	26	0.00565664	0.0168611	Cluster1	0.0214586			231	TRNA.CHARGING.PWY..tRNA.charging	Days_since_visit1	Days_since_visit1	3.11805e-05	5.53605e-05	121	115	0.574694	0.925481	0.848358
	313	PWY.6387..UDP.N.acetylmuramoyl.pentapeptide.biosynthesis.I..meso.diaminopimelate.containing.	Cluster	Cluster6	-0.000743329	0.000261762	121	118	0.00585438	0.0173948	Cluster1	0.0221192			232	PWY.6386..UDP.N.acetylmuramoyl.pentapeptide.biosynthesis.II..lysine.containing.	Days_since_visit1	Days_since_visit1	2.13141e-05	3.85586e-05	121	117	0.581844	0.932957	0.849715
	314	GLUCOSE1PMETAB.PWY..glucose.and.glucose.1.phosphate.degradation	Cluster	Cluster5	0.0002653	9.43075e-05	121	22	0.0059706	0.0176836	Cluster1	0.0224978			233	BRANCHED.CHAIN.AA.SYN.PWY..superpathway.of.branched.chain.amino.acid.biosynthesis	Days_since_visit1	Days_since_visit1	5.44235e-06	9.97843e-06	121	45	0.58678	0.936833	0.849715
	315	PWY.5918..superpathway.of.heme.b.biosynthesis.from.glutamate	Cluster	Cluster5	4.59649e-05	1.64099e-05	121	29	0.00599425	0.0176973	Cluster1	0.0225567			234	PWY.6123..inosine.5..phosphate.biosynthesis.I	Days_since_visit1	Days_since_visit1	-2.75653e-05	5.08828e-05	121	82	0.589319	0.936866	0.849715
	316	PWY.7210..pyrimidine.deoxyribonucleotides.biosynthesis.from.CTP	Cluster	Cluster4	-4.87144e-05	1.72481e-05	121	17	0.00614551	0.0180865	Cluster1	0.023095			237	THISYNARA.PWY..superpathway.of.thiamine.diphosphate.biosynthesis.III..eukaryotes.	Days_since_visit1	Days_since_visit1	6.34063e-06	1.19888e-05	121	57	0.598157	0.946765	0.855825
	317	PWY.7208..superpathway.of.pyrimidine.nucleobases.salvage	Cluster	Cluster5	0.000134064	4.83177e-05	121	80	0.00646098	0.0189549	Cluster1	0.0240873			243	PWY.6936..seleno.amino.acid.biosynthesis..plants.	Days_since_visit1	Days_since_visit1	-5.79132e-06	1.16405e-05	121	63	0.620014	0.956948	0.880325
	318	PWY.6386..UDP.N.acetylmuramoyl.pentapeptide.biosynthesis.II..lysine.containing.	Cluster	Cluster4	0.000280611	0.000100849	121	117	0.00654583	0.0191435	Cluster1	0.024339			246	PWY.5989..stearate.biosynthesis.II..bacteria.and.plants.	Days_since_visit1	Days_since_visit1	1.77221e-06	3.69714e-06	121	35	0.632876	0.957032	0.89178
	319	PWY.3001..superpathway.of.L.isoleucine.biosynthesis.I	Cluster	Cluster4	7.90698e-05	2.83011e-05	121	43	0.00673733	0.0196417	Cluster1	0.0249192			247	GLCMANNANAUT.PWY..superpathway.of.N.acetylglucosamine..N.acetylmannosamine.and.N.acetylneuraminate.degradation	Days_since_visit1	Days_since_visit1	-1.02848e-05	2.19771e-05	121	72	0.640929	0.965286	0.896337
	320	PWY.5367..petroselinate.biosynthesis	Cluster	Cluster2	-0.000149142	5.39769e-05	121	44	0.00690516	0.0200681	Cluster1	0.0255064			252	PWY.3841..folate.transformations.II..plants.	Days_since_visit1	Days_since_visit1	-1.35163e-05	3.0866e-05	121	107	0.662518	0.978003	0.915212
	321	PWY.6969..TCA.cycle.V..2.oxoglutarate.synthase.	Cluster	Cluster4	3.78698e-05	1.36932e-05	121	31	0.00701164	0.0203141	Cluster1	0.0258319			257	OANTIGEN.PWY..O.antigen.building.blocks.biosynthesis..E..coli.	Days_since_visit1	Days_since_visit1	-1.24546e-05	3.06807e-05	121	70	0.685731	0.981914	0.915212
	322	ARGSYN.PWY..L.arginine.biosynthesis.I..via.L.ornithine.	Cluster	Cluster5	6.51302e-05	2.39098e-05	121	23	0.0077065	0.0222579	Cluster1	0.0279162			259	P41.PWY..pyruvate.fermentation.to.acetate.and..S..lactate.I	Days_since_visit1	Days_since_visit1	2.01419e-05	5.58821e-05	121	116	0.719369	0.981914	0.92951
	323	PWY.7383..anaerobic.energy.metabolism..invertebrates..cytosol.	Cluster	Cluster4	3.36491e-05	1.23112e-05	121	26	0.00779557	0.0224455	Cluster1	0.0281657			261	P441.PWY..superpathway.of.N.acetylneuraminate.degradation	Days_since_visit1	Days_since_visit1	1.23884e-06	3.04862e-06	121	25	0.685408	0.981914	0.915212
	324	PWY.6387..UDP.N.acetylmuramoyl.pentapeptide.biosynthesis.I..meso.diaminopimelate.containing.	Cluster	Cluster4	0.000278643	0.000102926	121	118	0.00805392	0.0231177	Cluster1	0.0290251			263	PWY.5097..L.lysine.biosynthesis.VI	Days_since_visit1	Days_since_visit1	-7.94572e-06	2.20661e-05	121	89	0.71962	0.981914	0.92951
	325	PEPTIDOGLYCANSYN.PWY..peptidoglycan.biosynthesis.I..meso.diaminopimelate.containing.	Cluster	Cluster5	0.00032345	0.000120547	121	117	0.00842728	0.024115	Cluster1	0.0303317			264	PWY.5100..pyruvate.fermentation.to.acetate.and.lactate.II	Days_since_visit1	Days_since_visit1	2.04961e-05	5.58751e-05	121	117	0.714618	0.981914	0.92951
	326	FERMENTATION.PWY..mixed.acid.fermentation	Cluster	Cluster5	5.37287e-05	2.00654e-05	121	29	0.00862635	0.0246089	Cluster1	0.0309294			265	PWY.6122..5.aminoimidazole.ribonucleotide.biosynthesis.II	Days_since_visit1	Days_since_visit1	-2.23079e-05	5.55386e-05	121	82	0.688869	0.981914	0.915212
	327	PWY.5913..partial.TCA.cycle..obligate.autotrophs.	Cluster	Cluster5	6.93071e-05	2.5919e-05	121	28	0.00865527	0.0246159	Cluster1	0.0309936			266	PWY.6277..superpathway.of.5.aminoimidazole.ribonucleotide.biosynthesis	Days_since_visit1	Days_since_visit1	-2.23079e-05	5.55386e-05	121	82	0.688869	0.981914	0.915212
	328	PPGPPMET.PWY..ppGpp.metabolism	Cluster	Cluster5	2.13059e-05	7.97737e-06	121	26	0.00880344	0.024961	Cluster1	0.0313644			270	PWY.7953..UDP.N.acetylmuramoyl.pentapeptide.biosynthesis.III..meso.diaminopimelate.containing.	Days_since_visit1	Days_since_visit1	-1.32732e-05	3.57109e-05	121	60	0.710985	0.981914	0.92951
	329	CITRULBIO.PWY..L.citrulline.biosynthesis	Cluster	Cluster6	3.09931e-05	1.16072e-05	121	22	0.00900008	0.0253659	Cluster1	0.0319864			272	PWY0.1297..superpathway.of.purine.deoxyribonucleosides.degradation	Days_since_visit1	Days_since_visit1	-2.04615e-06	5.0532e-06	121	40	0.686465	0.981914	0.915212
	330	PWY0.1477..ethanolamine.utilization	Cluster	Cluster6	-0.000183638	6.86676e-05	121	78	0.00900081	0.0253659	Cluster1	0.0319864			273	PWY66.429..fatty.acid.biosynthesis.initiation..mitochondria.	Days_since_visit1	Days_since_visit1	8.92723e-06	2.15815e-05	121	81	0.680115	0.981914	0.915212
	331	PWY0.1297..superpathway.of.purine.deoxyribonucleosides.degradation	Cluster	Cluster4	4.01691e-05	1.51117e-05	121	40	0.00933211	0.0262201	Cluster1	0.0329969			274	ARGSYN.PWY..L.arginine.biosynthesis.I..via.L.ornithine.	Days_since_visit1	Days_since_visit1	-2.02631e-06	6.96561e-06	121	23	0.771763	0.988462	0.934256
	332	PYRIDOXSYN.PWY..pyridoxal.5..phosphate.biosynthesis.I	Cluster	Cluster6	5.52378e-05	2.08586e-05	121	26	0.00975987	0.0273394	Cluster1	0.0344661			275	ARGSYNBSUB.PWY..L.arginine.biosynthesis.II..acetyl.cycle.	Days_since_visit1	Days_since_visit1	-1.94571e-06	6.74794e-06	121	25	0.773713	0.988462	0.934256
	333	PWY.5989..stearate.biosynthesis.II..bacteria.and.plants.	Cluster	Cluster4	2.76135e-05	1.04154e-05	121	35	0.00993923	0.0277582	Cluster1	0.0350115			278	P161.PWY..acetylene.degradation..anaerobic.	Days_since_visit1	Days_since_visit1	5.20537e-06	1.80401e-05	121	75	0.773581	0.988462	0.934256
	334	PWY.7282..4.amino.2.methyl.5.diphosphomethylpyrimidine.biosynthesis.II	Cluster	Cluster5	5.97634e-05	2.28284e-05	121	33	0.0101116	0.028155	Cluster1	0.0355296			279	PHOSLIPSYN.PWY..superpathway.of.phospholipid.biosynthesis.I..bacteria.	Days_since_visit1	Days_since_visit1	-1.89163e-06	5.82834e-06	121	42	0.746249	0.988462	0.932106
	335	PWY.5384..sucrose.degradation.IV..sucrose.phosphorylase.	Cluster	Cluster2	-0.000190274	7.28175e-05	121	58	0.010296	0.0285828	Cluster1	0.0360872			281	PWY.3001..superpathway.of.L.isoleucine.biosynthesis.I	Days_since_visit1	Days_since_visit1	3.44068e-06	1.0376e-05	121	43	0.740938	0.988462	0.932106
	336	PWY.7977..L.methionine.biosynthesis.IV	Cluster	Cluster6	5.47473e-05	2.10265e-05	121	19	0.0104374	0.0288893	Cluster1	0.036492			286	PWY.724..superpathway.of.L.lysine..L.threonine.and.L.methionine.biosynthesis.II	Days_since_visit1	Days_since_visit1	6.43228e-06	2.08807e-05	121	87	0.758752	0.988462	0.934256
	337	PWY.7663..gondoate.biosynthesis..anaerobic.	Cluster	Cluster6	0.000190696	7.31205e-05	121	57	0.0109122	0.0301138	Cluster1	0.0379631			287	PWY.8178..pentose.phosphate.pathway..non.oxidative.branch..II	Days_since_visit1	Days_since_visit1	-3.94735e-06	1.39954e-05	121	58	0.778547	0.988462	0.934256
	338	PWY.7383..anaerobic.energy.metabolism..invertebrates..cytosol.	Cluster	Cluster5	3.96916e-05	1.53046e-05	121	26	0.010978	0.0302058	Cluster1	0.0381449			289	PWY0.1061..superpathway.of.L.alanine.biosynthesis	Days_since_visit1	Days_since_visit1	-8.25424e-06	2.47885e-05	121	67	0.739901	0.988462	0.932106
	339	PWY.7199..pyrimidine.deoxyribonucleosides.salvage	Cluster	Cluster4	0.00025861	9.99336e-05	121	79	0.0111461	0.0305777	Cluster1	0.0386333			290	PWY0.1477..ethanolamine.utilization	Days_since_visit1	Days_since_visit1	6.28136e-06	1.81003e-05	121	78	0.729365	0.988462	0.932106
	340	GLUCONEO.PWY..gluconeogenesis.I	Cluster	Cluster4	4.51117e-05	1.73112e-05	121	38	0.0112737	0.0308369	Cluster1	0.0390276			291	PWY0.162..superpathway.of.pyrimidine.ribonucleotides.de.novo.biosynthesis	Days_since_visit1	Days_since_visit1	-6.06935e-06	1.87328e-05	121	62	0.746687	0.988462	0.932106
	341	HEME.BIOSYNTHESIS.II..heme.b.biosynthesis.I..aerobic.	Cluster	Cluster5	3.00175e-05	1.16576e-05	121	33	0.0113361	0.0309167	Cluster1	0.0391954			292	PWY66.399..gluconeogenesis.III	Days_since_visit1	Days_since_visit1	7.69554e-07	2.66049e-06	121	17	0.77303	0.988462	0.934256
	342	PWY66.399..gluconeogenesis.III	Cluster	Cluster5	2.56874e-05	9.97397e-06	121	17	0.0113959	0.0309889	Cluster1	0.0393538			294	UNINTEGRATED	Days_since_visit1	Days_since_visit1	0.000289135	0.0012198	121	121	0.813178	0.989313	0.936932
	343	HEME.BIOSYNTHESIS.II..heme.b.biosynthesis.I..aerobic.	Cluster	Cluster4	2.48351e-05	9.68374e-06	121	33	0.0118333	0.0320845	Cluster1	0.040764			298	CITRULBIO.PWY..L.citrulline.biosynthesis	Days_since_visit1	Days_since_visit1	5.38304e-08	1.7126e-06	121	22	0.974994	0.989313	0.979616
	344	PWY.7184..pyrimidine.deoxyribonucleotides.de.novo.biosynthesis.I	Cluster	Cluster4	-4.16899e-05	1.6183e-05	121	21	0.0119845	0.0324001	Cluster1	0.0410836			299	COA.PWY.1..superpathway.of.coenzyme.A.biosynthesis.III..mammals.	Days_since_visit1	Days_since_visit1	-8.66929e-06	3.24984e-05	121	108	0.79028	0.989313	0.936932
	345	GLYCOLYSIS..glycolysis.I..from.glucose.6.phosphate.	Cluster	Cluster5	-0.000290541	0.000114425	121	84	0.0124778	0.0336357	Cluster1	0.0424123			301	DTDPRHAMSYN.PWY..dTDP..beta..L.rhamnose.biosynthesis	Days_since_visit1	Days_since_visit1	-2.24917e-06	2.73227e-05	121	71	0.934571	0.989313	0.960388
	346	PWY.7199..pyrimidine.deoxyribonucleosides.salvage	Cluster	Cluster5	0.000305348	0.000120406	121	79	0.0126069	0.0338857	Cluster1	0.042748			302	FASYN.ELONG.PWY..fatty.acid.elongation....saturated	Days_since_visit1	Days_since_visit1	4.54324e-07	2.52299e-06	121	16	0.857528	0.989313	0.936932
	347	ARGSYNBSUB.PWY..L.arginine.biosynthesis.II..acetyl.cycle.	Cluster	Cluster5	5.85562e-05	2.30705e-05	121	25	0.0128256	0.0342754	Cluster1	0.0432807			303	GLUTORN.PWY..L.ornithine.biosynthesis.I	Days_since_visit1	Days_since_visit1	7.05395e-07	4.93108e-06	121	24	0.886559	0.989313	0.936932
	348	PWY.6387..UDP.N.acetylmuramoyl.pentapeptide.biosynthesis.I..meso.diaminopimelate.containing.	Cluster	Cluster5	0.000313869	0.000124064	121	118	0.0128245	0.0342754	Cluster1	0.0432807			304	GLYCOGENSYNTH.PWY..glycogen.biosynthesis.I..from.ADP.D.Glucose.	Days_since_visit1	Days_since_visit1	3.38455e-06	3.89623e-05	121	68	0.930966	0.989313	0.960388
	349	PWY.6969..TCA.cycle.V..2.oxoglutarate.synthase.	Cluster	Cluster5	4.2684e-05	1.68748e-05	121	31	0.0129615	0.0345391	Cluster1	0.0436866			306	HISTSYN.PWY..L.histidine.biosynthesis	Days_since_visit1	Days_since_visit1	-9.29325e-07	5.34423e-06	121	14	0.862321	0.989313	0.936932
	350	FERMENTATION.PWY..mixed.acid.fermentation	Cluster	Cluster4	4.13863e-05	1.63643e-05	121	29	0.0133038	0.0353501	Cluster1	0.0445387			308	ILEUSYN.PWY..L.isoleucine.biosynthesis.I..from.threonine.	Days_since_visit1	Days_since_visit1	2.31431e-06	1.03887e-05	121	52	0.824206	0.989313	0.936932
	351	PWY.3841..folate.transformations.II..plants.	Cluster	Cluster3	0.000566339	0.000224872	121	107	0.0134792	0.035714	Cluster1	0.0449466			310	NONOXIPENT.PWY..pentose.phosphate.pathway..non.oxidative.branch..I	Days_since_visit1	Days_since_visit1	-2.45494e-06	1.64455e-05	121	61	0.881664	0.989313	0.936932
	352	PWY.6901..superpathway.of.glucose.and.xylose.degradation	Cluster	Cluster4	3.68733e-05	1.47517e-05	121	32	0.0141213	0.0371255	Cluster1	0.0467342			312	P164.PWY..purine.nucleobases.degradation.I..anaerobic.	Days_since_visit1	Days_since_visit1	-1.74096e-06	8.46652e-06	121	46	0.837512	0.989313	0.936932
	353	PWY.7220..adenosine.deoxyribonucleotides.de.novo.biosynthesis.II	Cluster	Cluster4	6.05996e-05	2.41806e-05	121	75	0.0141317	0.0371255	Cluster1	0.0467342			313	PANTO.PWY..phosphopantothenate.biosynthesis.I	Days_since_visit1	Days_since_visit1	-7.74149e-06	3.3338e-05	121	62	0.816887	0.989313	0.936932
	354	PWY.7222..guanosine.deoxyribonucleotides.de.novo.biosynthesis.II	Cluster	Cluster4	6.05996e-05	2.41806e-05	121	75	0.0141317	0.0371255	Cluster1	0.0467342			314	PENTOSE.P.PWY..pentose.phosphate.pathway	Days_since_visit1	Days_since_visit1	-3.20912e-06	1.57034e-05	121	59	0.83853	0.989313	0.936932
	355	HEMESYN2.PWY..heme.b.biosynthesis.II..oxygen.independent.	Cluster	Cluster4	2.98918e-05	1.19898e-05	121	32	0.0142935	0.0374451	Cluster1	0.0472141			317	PWY.5005..biotin.biosynthesis.II	Days_since_visit1	Days_since_visit1	-4.82767e-08	1.88435e-06	121	25	0.979616	0.989313	0.979616
	356	PWY.6386..UDP.N.acetylmuramoyl.pentapeptide.biosynthesis.II..lysine.containing.	Cluster	Cluster5	0.00030272	0.000121819	121	117	0.0144756	0.0378155	Cluster1	0.0475917			318	PWY.5103..L.isoleucine.biosynthesis.III	Days_since_visit1	Days_since_visit1	1.68247e-06	9.45229e-06	121	52	0.859117	0.989313	0.936932
	357	GLYCOLYSIS..glycolysis.I..from.glucose.6.phosphate.	Cluster	Cluster2	-0.000277315	0.000111904	121	84	0.0147235	0.0383554	Cluster1	0.0482939			323	PWY.5686..UMP.biosynthesis.I	Days_since_visit1	Days_since_visit1	6.61448e-06	5.89732e-05	121	116	0.91095	0.989313	0.946574
	358	PWY.5918..superpathway.of.heme.b.biosynthesis.from.glutamate	Cluster	Cluster4	3.39303e-05	1.36954e-05	121	29	0.014864	0.0386131	Cluster1	0.048641			332	PWY.621..sucrose.degradation.III..sucrose.invertase.	Days_since_visit1	Days_since_visit1	6.85245e-07	5.24735e-06	121	32	0.896383	0.989313	0.941962
	359	PWY4LZ.257..superpathway.of.fermentation..Chlamydomonas.reinhardtii.	Cluster	Cluster5	2.21472e-05	8.93363e-06	121	16	0.0151496	0.0392456	Cluster1	0.0494033			335	PWY.6282..palmitoleate.biosynthesis.I..from..5Z..dodec.5.enoate.	Days_since_visit1	Days_since_visit1	3.49718e-07	2.26422e-06	121	16	0.877617	0.989313	0.936932
	360	PWY.8004..Entner.Doudoroff.pathway.I	Cluster	Cluster6	3.65415e-05	1.49038e-05	121	24	0.0157168	0.0406018	Cluster1	0.051073			337	PWY.6527..stachyose.degradation	Days_since_visit1	Days_since_visit1	4.42573e-06	1.85087e-05	121	69	0.811559	0.989313	0.936932
	361	PWY.7115..C4.photosynthetic.carbon.assimilation.cycle..NAD.ME.type	Cluster	Cluster6	4.61882e-05	1.87799e-05	121	42	0.0158313	0.0407841	Cluster1	0.0513284			339	PWY.6630..superpathway.of.L.tyrosine.biosynthesis	Days_since_visit1	Days_since_visit1	2.03502e-06	1.12803e-05	121	47	0.857233	0.989313	0.936932
	362	PWY0.845..superpathway.of.pyridoxal.5..phosphate.biosynthesis.and.salvage	Cluster	Cluster5	2.91543e-05	1.19533e-05	121	25	0.0163194	0.0419255	Cluster1	0.0527286			342	PWY.6897..thiamine.diphosphate.salvage.II	Days_since_visit1	Days_since_visit1	-2.06357e-06	1.32481e-05	121	50	0.876559	0.989313	0.936932
	363	PWY.5981..CDP.diacylglycerol.biosynthesis.III	Cluster	Cluster5	-0.000164752	6.73685e-05	121	45	0.016378	0.0419602	Cluster1	0.0528571			343	PWY.6969..TCA.cycle.V..2.oxoglutarate.synthase.	Days_since_visit1	Days_since_visit1	1.12048e-06	4.67279e-06	121	31	0.811019	0.989313	0.936932
	364	HEMESYN2.PWY..heme.b.biosynthesis.II..oxygen.independent.	Cluster	Cluster5	3.50468e-05	1.43962e-05	121	32	0.0164907	0.0421328	Cluster1	0.0531598			345	PWY.7111..pyruvate.fermentation.to.isobutanol..engineered.	Days_since_visit1	Days_since_visit1	3.17835e-07	9.32977e-06	121	52	0.972898	0.989313	0.979616
	365	PWY.7197..pyrimidine.deoxyribonucleotide.phosphorylation	Cluster	Cluster4	5.36672e-05	2.19757e-05	121	76	0.0169213	0.0431145	Cluster1	0.054423			346	PWY.7115..C4.photosynthetic.carbon.assimilation.cycle..NAD.ME.type	Days_since_visit1	Days_since_visit1	1.27965e-07	3.00496e-06	121	42	0.966125	0.989313	0.979616
	366	GLYCOLYSIS.E.D..superpathway.of.glycolysis.and.the.Entner.Doudoroff.pathway	Cluster	Cluster6	4.34629e-05	1.80223e-05	121	24	0.017464	0.0443757	Cluster1	0.0559126			347	PWY.7199..pyrimidine.deoxyribonucleosides.salvage	Days_since_visit1	Days_since_visit1	-7.80483e-06	3.56027e-05	121	79	0.826958	0.989313	0.936932
	367	PWY0.845..superpathway.of.pyridoxal.5..phosphate.biosynthesis.and.salvage	Cluster	Cluster6	6.08781e-05	2.51026e-05	121	25	0.0175516	0.0444768	Cluster1	0.0561292			354	PWY.7357..thiamine.phosphate.formation.from.pyrithiamine.and.oxythiamine..yeast.	Days_since_visit1	Days_since_visit1	6.30808e-07	2.40859e-05	121	65	0.979162	0.989313	0.979616
	368	PWY.5989..stearate.biosynthesis.II..bacteria.and.plants.	Cluster	Cluster5	3.11623e-05	1.29459e-05	121	35	0.0180705	0.0456674	Cluster1	0.0577231			357	PWY.7664..oleate.biosynthesis.IV..anaerobic.	Days_since_visit1	Days_since_visit1	3.80401e-07	2.39252e-06	121	16	0.874051	0.989313	0.936932
	369	GLYCOLYSIS.E.D..superpathway.of.glycolysis.and.the.Entner.Doudoroff.pathway	Cluster	Cluster4	1.67337e-05	6.98908e-06	121	24	0.0182701	0.0460467	Cluster1	0.0581623			359	PWY.841..superpathway.of.purine.nucleotides.de.novo.biosynthesis.I	Days_since_visit1	Days_since_visit1	-2.77132e-06	1.3144e-05	121	57	0.833482	0.989313	0.936932
	370	P164.PWY..purine.nucleobases.degradation.I..anaerobic.	Cluster	Cluster4	6.01367e-05	2.50391e-05	121	46	0.0185286	0.0465719	Cluster1	0.0588519			361	PWY0.1296..purine.ribonucleosides.degradation	Days_since_visit1	Days_since_visit1	-1.73097e-06	8.52696e-06	121	55	0.839584	0.989313	0.936932
	371	PWY.8004..Entner.Doudoroff.pathway.I	Cluster	Cluster4	1.37562e-05	5.77973e-06	121	24	0.0189537	0.0475119	Cluster1	0.0600662			366	PWY0.862...5Z..dodecenoate.biosynthesis.I	Days_since_visit1	Days_since_visit1	3.6755e-07	1.90699e-06	121	19	0.847622	0.989313	0.936932
	372	PWY.7117..C4.photosynthetic.carbon.assimilation.cycle..PEPCK.type	Cluster	Cluster6	0.000147797	6.17552e-05	121	43	0.0190323	0.0475808	Cluster1	0.0601798			371	VALSYN.PWY..L.valine.biosynthesis	Days_since_visit1	Days_since_visit1	1.32858e-06	1.11223e-05	121	57	0.905178	0.989313	0.94586
	373	PWY.5913..partial.TCA.cycle..obligate.autotrophs.	Cluster	Cluster4	5.0951e-05	2.13747e-05	121	28	0.0191845	0.0478326	Cluster1	0.0605333
	374	PWY.7356..thiamine.diphosphate.salvage.IV..yeast.	Cluster	Cluster5	6.03976e-05	2.54148e-05	121	21	0.01963	0.0488126	Cluster1	0.0617226
	375	PWY.5121..superpathway.of.geranylgeranyl.diphosphate.biosynthesis.II..via.MEP.	Cluster	Cluster5	5.79166e-05	2.45253e-05	121	24	0.0199511	0.0494787	Cluster1	0.0624527
	376	PWY.7184..pyrimidine.deoxyribonucleotides.de.novo.biosynthesis.I	Cluster	Cluster5	-4.71437e-05	2.0113e-05	121	21	0.0211555	0.0523261	Cluster1	0.0660756
	377	PWY.4984..urea.cycle	Cluster	Cluster4	7.4819e-06	3.27908e-06	121	21	0.0225065	0.05552	Cluster1	0.0697528
	378	PWY.7323..superpathway.of.GDP.mannose.derived.O.antigen.building.blocks.biosynthesis	Cluster	Cluster4	2.17592e-05	9.39888e-06	121	27	0.022849	0.0562158	Cluster1	0.0706584
	379	POLYAMINSYN3.PWY..superpathway.of.polyamine.biosynthesis.II	Cluster	Cluster5	6.1238e-06	2.66623e-06	121	14	0.0246219	0.0604178	Cluster1	0.0758254
	380	PWY.5913..partial.TCA.cycle..obligate.autotrophs.	Cluster	Cluster6	0.000123576	5.40409e-05	121	28	0.0249427	0.061044	Cluster1	0.0766273
	381	PEPTIDOGLYCANSYN.PWY..peptidoglycan.biosynthesis.I..meso.diaminopimelate.containing.	Cluster	Cluster3	0.000664631	0.00029276	121	117	0.0251203	0.0613172	Cluster1	0.0770885
	382	PWY.7210..pyrimidine.deoxyribonucleotides.biosynthesis.from.CTP	Cluster	Cluster2	-4.70858e-05	2.0781e-05	121	17	0.0260571	0.0634375	Cluster1	0.0797025
	383	PWY4FS.7..phosphatidylglycerol.biosynthesis.I..plastidic.	Cluster	Cluster5	8.37401e-05	3.72177e-05	121	52	0.0266232	0.0644787	Cluster1	0.0812579
	384	PWY4FS.8..phosphatidylglycerol.biosynthesis.II..non.plastidic.	Cluster	Cluster5	8.37401e-05	3.72177e-05	121	52	0.0266235	0.0644787	Cluster1	0.0812579
	385	GLUTORN.PWY..L.ornithine.biosynthesis.I	Cluster	Cluster5	3.71637e-05	1.64953e-05	121	24	0.0267577	0.0646354	Cluster1	0.081579
	386	PWY.7115..C4.photosynthetic.carbon.assimilation.cycle..NAD.ME.type	Cluster	Cluster5	2.0844e-05	9.29535e-06	121	42	0.0277569	0.0668753	Cluster1	0.0838973
	387	P164.PWY..purine.nucleobases.degradation.I..anaerobic.	Cluster	Cluster5	6.74344e-05	3.08087e-05	121	46	0.0308794	0.0742062	Cluster1	0.0924407
	388	PWY.6588..pyruvate.fermentation.to.acetone	Cluster	Cluster6	2.05131e-05	9.52428e-06	121	21	0.031353	0.0751502	Cluster1	0.0935597
	389	PWY.5121..superpathway.of.geranylgeranyl.diphosphate.biosynthesis.II..via.MEP.	Cluster	Cluster4	4.42821e-05	2.03165e-05	121	24	0.0317067	0.0758028	Cluster1	0.094315
	390	LACTOSECAT.PWY..lactose.and.galactose.degradation.I	Cluster	Cluster4	-0.000209206	9.57136e-05	121	75	0.0319221	0.076122	Cluster1	0.0947551
	391	P42.PWY..incomplete.reductive.TCA.cycle	Cluster	Cluster4	1.67282e-05	7.81639e-06	121	24	0.0348896	0.0829855	Cluster1	0.102161
	392	GLYCOLYSIS..glycolysis.I..from.glucose.6.phosphate.	Cluster	Cluster6	-0.000522818	0.000244188	121	84	0.0354034	0.0839926	Cluster1	0.103235
	393	PWY.5989..stearate.biosynthesis.II..bacteria.and.plants.	Cluster	Cluster6	5.60502e-05	2.62075e-05	121	35	0.0356128	0.0842419	Cluster1	0.103524
	394	PWY.6387..UDP.N.acetylmuramoyl.pentapeptide.biosynthesis.I..meso.diaminopimelate.containing.	Cluster	Cluster3	0.000640394	0.000301204	121	118	0.0356896	0.0842419	Cluster1	0.10364
	395	PYRIDOXSYN.PWY..pyridoxal.5..phosphate.biosynthesis.I	Cluster	Cluster4	1.73546e-05	8.17902e-06	121	26	0.0363173	0.0855065	Cluster1	0.105029
	396	PWY4LZ.257..superpathway.of.fermentation..Chlamydomonas.reinhardtii.	Cluster	Cluster6	3.8036e-05	1.80257e-05	121	16	0.0375594	0.0882076	Cluster1	0.108287
	397	PWY.6386..UDP.N.acetylmuramoyl.pentapeptide.biosynthesis.II..lysine.containing.	Cluster	Cluster3	0.000621134	0.00029587	121	117	0.0380518	0.089139	Cluster1	0.109482
	398	PWY.7184..pyrimidine.deoxyribonucleotides.de.novo.biosynthesis.I	Cluster	Cluster2	-4.08574e-05	1.94335e-05	121	21	0.0384118	0.0897562	Cluster1	0.110292
	399	PWY0.845..superpathway.of.pyridoxal.5..phosphate.biosynthesis.and.salvage	Cluster	Cluster4	2.06213e-05	9.89462e-06	121	25	0.0397748	0.0927082	Cluster1	0.113625
	400	PWY.5130..2.oxobutanoate.degradation.I	Cluster	Cluster4	1.33893e-05	6.44449e-06	121	24	0.0405581	0.0942977	Cluster1	0.115161
	401	PWY66.409..superpathway.of.purine.nucleotide.salvage	Cluster	Cluster4	4.71983e-05	2.28994e-05	121	33	0.0417013	0.0967138	Cluster1	0.117546
	402	PWY.6305..superpathway.of.putrescine.biosynthesis	Cluster	Cluster5	7.68643e-06	3.8028e-06	121	33	0.0452921	0.10478	Cluster1	0.125435
	403	CITRULBIO.PWY..L.citrulline.biosynthesis	Cluster	Cluster4	9.17757e-06	4.55652e-06	121	22	0.0479877	0.110741	Cluster1	0.131475
	404	HEMESYN2.PWY..heme.b.biosynthesis.II..oxygen.independent.	Cluster	Cluster6	6.15302e-05	3.06452e-05	121	32	0.0481302	0.110795	Cluster1	0.131737
	405	PWY.6606..guanosine.nucleotides.degradation.II	Cluster	Cluster2	3.18641e-05	1.58698e-05	121	14	0.0484714	0.111305	Cluster1	0.132285
	406	HISTSYN.PWY..L.histidine.biosynthesis	Cluster	Cluster5	3.60135e-05	1.80596e-05	121	14	0.0492084	0.112719	Cluster1	0.134166
	407	PWY.7664..oleate.biosynthesis.IV..anaerobic.	Cluster	Cluster5	1.68509e-05	8.46481e-06	121	16	0.0497621	0.113707	Cluster1	0.135522
	408	PWY66.389..phytol.degradation	Cluster	Cluster4	9.96453e-06	5.00168e-06	121	39	0.0504495	0.114995	Cluster1	0.137018
	409	FASYN.ELONG.PWY..fatty.acid.elongation....saturated	Cluster	Cluster5	1.75917e-05	8.86905e-06	121	16	0.0506449	0.115158	Cluster1	0.137283
	410	PWY.5484..glycolysis.II..from.fructose.6.phosphate.	Cluster	Cluster2	-0.000127531	6.47661e-05	121	58	0.051457	0.116719	Cluster1	0.13935
	411	GLUCONEO.PWY..gluconeogenesis.I	Cluster	Cluster5	4.2835e-05	2.17302e-05	121	38	0.051806	0.117225	Cluster1	0.14016
	412	PWY.6282..palmitoleate.biosynthesis.I..from..5Z..dodec.5.enoate.	Cluster	Cluster5	1.58837e-05	8.05837e-06	121	16	0.0519319	0.117225	Cluster1	0.140366
	413	COA.PWY..coenzyme.A.biosynthesis.I..prokaryotic.	Cluster	Cluster3	0.000397639	0.000202341	121	117	0.052465	0.118141	Cluster1	0.140859
	414	POLYISOPRENSYN.PWY..polyisoprenoid.biosynthesis..E..coli.	Cluster	Cluster5	4.02895e-05	2.05529e-05	121	31	0.0526916	0.118365	Cluster1	0.141198
	415	UNINTEGRATED	Cluster	Cluster2	-0.00816712	0.00423961	121	121	0.0565501	0.126727	Cluster1	0.149823
	416	GLUTORN.PWY..L.ornithine.biosynthesis.I	Cluster	Cluster6	6.38318e-05	3.32399e-05	121	24	0.0581002	0.129888	Cluster1	0.152921
	417	PWY.7790..UMP.biosynthesis.II	Cluster	Cluster4	0.000214877	0.000113198	121	116	0.0608253	0.135654	Cluster1	0.158756
	418	PWY.7791..UMP.biosynthesis.III	Cluster	Cluster4	0.000214753	0.000113198	121	116	0.0609794	0.135672	Cluster1	0.158863
	419	PWY.6608..guanosine.nucleotides.degradation.III	Cluster	Cluster6	0.00014935	7.86994e-05	121	52	0.0615588	0.136634	Cluster1	0.159924
	420	PWY.7221..guanosine.ribonucleotides.de.novo.biosynthesis	Cluster	Cluster3	0.000750659	0.000397668	121	112	0.061896	0.137055	Cluster1	0.160211
	421	PYRIDOXSYN.PWY..pyridoxal.5..phosphate.biosynthesis.I	Cluster	Cluster5	1.84611e-05	9.83668e-06	121	26	0.0631561	0.139513	Cluster1	0.162873
	422	PWY.7111..pyruvate.fermentation.to.isobutanol..engineered.	Cluster	Cluster6	0.000122453	6.52633e-05	121	52	0.0643943	0.141912	Cluster1	0.165459
	423	ASPASN.PWY..superpathway.of.L.aspartate.and.L.asparagine.biosynthesis	Cluster	Cluster2	-7.1001e-05	3.84928e-05	121	67	0.0681556	0.149846	Cluster1	0.173695
	424	PWY.7356..thiamine.diphosphate.salvage.IV..yeast.	Cluster	Cluster4	3.74139e-05	2.02279e-05	121	21	0.0687761	0.150853	Cluster1	0.174734
	425	PWY.7392..taxadiene.biosynthesis..engineered.	Cluster	Cluster5	3.85432e-05	2.10796e-05	121	15	0.0701535	0.153512	Cluster1	0.17718
	426	PWY.6859..all.trans.farnesol.biosynthesis	Cluster	Cluster5	2.26515e-05	1.2547e-05	121	17	0.0737372	0.160976	Cluster1	0.184545
	427	PWY.7221..guanosine.ribonucleotides.de.novo.biosynthesis	Cluster	Cluster5	0.000294999	0.000163365	121	112	0.0739313	0.161021	Cluster1	0.184561
	428	PWY.6859..all.trans.farnesol.biosynthesis	Cluster	Cluster4	1.86617e-05	1.04041e-05	121	17	0.0759577	0.165048	Cluster1	0.18779
	429	PWY.5367..petroselinate.biosynthesis	Cluster	Cluster6	-0.000202712	0.000113431	121	44	0.077666	0.168367	Cluster1	0.191369
	430	POLYAMINSYN3.PWY..superpathway.of.polyamine.biosynthesis.II	Cluster	Cluster4	3.74462e-06	2.09412e-06	121	14	0.0784282	0.169624	Cluster1	0.192543
	431	PWY.7392..taxadiene.biosynthesis..engineered.	Cluster	Cluster4	3.07993e-05	1.75096e-05	121	15	0.0816659	0.176216	Cluster1	0.199446
	432	PWY.5981..CDP.diacylglycerol.biosynthesis.III	Cluster	Cluster3	-0.000288695	0.000164135	121	45	0.0819203	0.176356	Cluster1	0.199737
	433	PWY0.301..L.ascorbate.degradation.I..bacterial..anaerobic.	Cluster	Cluster4	2.95654e-05	1.69307e-05	121	28	0.0843976	0.18127	Cluster1	0.205292
	434	PWY4FS.7..phosphatidylglycerol.biosynthesis.I..plastidic.	Cluster	Cluster2	6.08907e-05	3.60992e-05	121	52	0.0949835	0.203071	Cluster1	0.225128
	435	PWY4FS.8..phosphatidylglycerol.biosynthesis.II..non.plastidic.	Cluster	Cluster2	6.08906e-05	3.60993e-05	121	52	0.0949846	0.203071	Cluster1	0.225128
	436	COA.PWY.1..superpathway.of.coenzyme.A.biosynthesis.III..mammals.	Cluster	Cluster3	0.00039047	0.000236006	121	108	0.10104	0.21552	Cluster1	0.236488
	437	PWY.5103..L.isoleucine.biosynthesis.III	Cluster	Cluster6	0.000108722	6.59573e-05	121	52	0.103322	0.219884	Cluster1	0.241027
	438	X1CMET2.PWY..folate.transformations.III..E..coli.	Cluster	Cluster4	1.87688e-05	1.13852e-05	121	20	0.104311	0.221483	Cluster1	0.242648
	439	HEME.BIOSYNTHESIS.II..heme.b.biosynthesis.I..aerobic.	Cluster	Cluster6	4.00922e-05	2.46658e-05	121	33	0.108098	0.229001	Cluster1	0.24993
	440	PWY.7977..L.methionine.biosynthesis.IV	Cluster	Cluster4	1.30607e-05	8.15411e-06	121	19	0.111959	0.23664	Cluster1	0.257014
	441	PWY.922..mevalonate.pathway.I..eukaryotes.and.bacteria.	Cluster	Cluster6	-0.000266812	0.000168795	121	66	0.116696	0.246094	Cluster1	0.26626
	442	PWY.5973..cis.vaccenate.biosynthesis	Cluster	Cluster4	-8.30162e-05	5.27619e-05	121	71	0.119374	0.251171	Cluster1	0.270831
	443	P441.PWY..superpathway.of.N.acetylneuraminate.degradation	Cluster	Cluster6	3.30456e-05	2.10541e-05	121	25	0.120099	0.252127	Cluster1	0.2716
	444	LACTOSECAT.PWY..lactose.and.galactose.degradation.I	Cluster	Cluster3	-0.000445797	0.000287589	121	75	0.124296	0.26035	Cluster1	0.278625
	445	PWY.5367..petroselinate.biosynthesis	Cluster	Cluster3	-0.000207413	0.000135645	121	44	0.129358	0.269738	Cluster1	0.287678
	446	PWY.6936..seleno.amino.acid.biosynthesis..plants.	Cluster	Cluster6	0.000112867	7.36023e-05	121	63	0.129137	0.269738	Cluster1	0.287414
	447	VALSYN.PWY..L.valine.biosynthesis	Cluster	Cluster6	0.000119561	7.81997e-05	121	57	0.130382	0.271264	Cluster1	0.289497
	448	X1CMET2.PWY..folate.transformations.III..E..coli.	Cluster	Cluster6	4.46057e-05	2.92824e-05	121	20	0.131136	0.272225	Cluster1	0.290943
	449	BRANCHED.CHAIN.AA.SYN.PWY..superpathway.of.branched.chain.amino.acid.biosynthesis	Cluster	Cluster6	0.000100845	6.67887e-05	121	45	0.134895	0.27894	Cluster1	0.296641
	450	PWY0.862...5Z..dodecenoate.biosynthesis.I	Cluster	Cluster5	1.21502e-05	8.06629e-06	121	19	0.134971	0.27894	Cluster1	0.296641
	451	PWY.6969..TCA.cycle.V..2.oxoglutarate.synthase.	Cluster	Cluster6	5.10915e-05	3.44003e-05	121	31	0.141311	0.291396	Cluster1	0.306316
	452	PWY.1042..glycolysis.IV	Cluster	Cluster5	0.000147624	9.97577e-05	121	93	0.141655	0.291458	Cluster1	0.306774
	453	P441.PWY..superpathway.of.N.acetylneuraminate.degradation	Cluster	Cluster5	1.54594e-05	1.04478e-05	121	25	0.142471	0.292245	Cluster1	0.308304
	454	PWY.1269..CMP.3.deoxy.D.manno.octulosonate.biosynthesis	Cluster	Cluster6	5.36413e-05	3.62253e-05	121	46	0.142666	0.292245	Cluster1	0.308487
	455	PWY.6305..superpathway.of.putrescine.biosynthesis	Cluster	Cluster4	4.79265e-06	3.25591e-06	121	33	0.143424	0.292634	Cluster1	0.309782
	456	PWY.6527..stachyose.degradation	Cluster	Cluster6	-0.000229484	0.000155269	121	69	0.143485	0.292634	Cluster1	0.309782
	457	PWY.5981..CDP.diacylglycerol.biosynthesis.III	Cluster	Cluster6	-0.000200222	0.000136054	121	45	0.144969	0.295014	Cluster1	0.312746
	458	PWY.5130..2.oxobutanoate.degradation.I	Cluster	Cluster5	1.15254e-05	7.87015e-06	121	24	0.14601	0.296484	Cluster1	0.314269
	459	PWY.5973..cis.vaccenate.biosynthesis	Cluster	Cluster6	-0.000194019	0.000132642	121	71	0.147503	0.298863	Cluster1	0.317109
	460	PWY.4984..urea.cycle	Cluster	Cluster5	5.91808e-06	4.0998e-06	121	21	0.148878	0.300993	Cluster1	0.319219
	461	P164.PWY..purine.nucleobases.degradation.I..anaerobic.	Cluster	Cluster2	4.32918e-05	2.98825e-05	121	46	0.150668	0.303951	Cluster1	0.321831
	462	NONOXIPENT.PWY..pentose.phosphate.pathway..non.oxidative.branch..I	Cluster	Cluster6	0.000192745	0.000133885	121	61	0.153945	0.30989	Cluster1	0.328082
	463	PWY.7210..pyrimidine.deoxyribonucleotides.biosynthesis.from.CTP	Cluster	Cluster6	-6.21875e-05	4.35173e-05	121	17	0.156709	0.314772	Cluster1	0.333095
	464	PWY.I9..L.cysteine.biosynthesis.VI..from.L.methionine.	Cluster	Cluster5	-6.78939e-05	4.7886e-05	121	17	0.159536	0.31976	Cluster1	0.338458
	465	LACTOSECAT.PWY..lactose.and.galactose.degradation.I	Cluster	Cluster5	-0.000166159	0.000118105	121	75	0.162633	0.325266	Cluster1	0.342957
	466	ILEUSYN.PWY..L.isoleucine.biosynthesis.I..from.threonine.	Cluster	Cluster6	9.97565e-05	7.22535e-05	121	52	0.171345	0.341955	Cluster1	0.358105
	467	PWY.6902..chitin.degradation.II..Vibrio.	Cluster	Cluster2	-9.71978e-06	7.08472e-06	121	16	0.174378	0.347262	Cluster1	0.363094
	468	RIBOSYN2.PWY..flavin.biosynthesis.I..bacteria.and.plants.	Cluster	Cluster6	-0.000152179	0.000111276	121	70	0.175265	0.348284	Cluster1	0.364402
	469	PWY.702..L.methionine.biosynthesis.II	Cluster	Cluster5	-6.01377e-05	4.41825e-05	121	16	0.177078	0.351136	Cluster1	0.367085
	470	COA.PWY.1..superpathway.of.coenzyme.A.biosynthesis.III..mammals.	Cluster	Cluster5	-0.000131264	9.70081e-05	121	108	0.179011	0.35241	Cluster1	0.369456
	471	LACTOSECAT.PWY..lactose.and.galactose.degradation.I	Cluster	Cluster6	-0.000326441	0.000240461	121	75	0.178569	0.35241	Cluster1	0.369087
	472	PWY.1042..glycolysis.IV	Cluster	Cluster6	-0.000305557	0.000224982	121	93	0.178222	0.35241	Cluster1	0.36864
	473	PWY.6588..pyruvate.fermentation.to.acetone	Cluster	Cluster4	5.05453e-06	3.76225e-06	121	21	0.179236	0.35241	Cluster1	0.369513
	474	PWY.5189..tetrapyrrole.biosynthesis.II..from.glycine.	Cluster	Cluster6	5.56633e-05	4.18091e-05	121	45	0.186782	0.366471	Cluster1	0.381031
	475	PWY.5973..cis.vaccenate.biosynthesis	Cluster	Cluster3	-0.000207714	0.000157387	121	71	0.189785	0.371578	Cluster1	0.385466
	476	PWY.922..mevalonate.pathway.I..eukaryotes.and.bacteria.	Cluster	Cluster3	-0.000266812	0.000203475	121	66	0.192376	0.375861	Cluster1	0.389323
	477	PWY0.1296..purine.ribonucleosides.degradation	Cluster	Cluster6	7.70771e-05	5.86852e-05	121	55	0.192928	0.376149	Cluster1	0.390159
	478	ASPASN.PWY..superpathway.of.L.aspartate.and.L.asparagine.biosynthesis	Cluster	Cluster6	0.000106054	8.16251e-05	121	67	0.197907	0.38505	Cluster1	0.398223
	479	ANAGLYCOLYSIS.PWY..glycolysis.III..from.glucose.	Cluster	Cluster2	-0.000130424	0.000100847	121	60	0.198755	0.385892	Cluster1	0.398787
	480	CITRULBIO.PWY..L.citrulline.biosynthesis	Cluster	Cluster5	7.44252e-06	5.75958e-06	121	22	0.199684	0.386887	Cluster1	0.400079
	481	PWY0.1319..CDP.diacylglycerol.biosynthesis.II	Cluster	Cluster3	-0.000255965	0.000203927	121	93	0.211959	0.409816	Cluster1	0.42018
	482	PWY.5667..CDP.diacylglycerol.biosynthesis.I	Cluster	Cluster3	-0.000255965	0.000204235	121	92	0.212643	0.410089	Cluster1	0.420648
	483	UDPNAGSYN.PWY..UDP.N.acetyl.D.glucosamine.biosynthesis.I	Cluster	Cluster3	0.000396405	0.000316372	121	118	0.212982	0.410089	Cluster1	0.420725
	484	PWY.6902..chitin.degradation.II..Vibrio.	Cluster	Cluster4	-7.33266e-06	5.84788e-06	121	16	0.214748	0.412636	Cluster1	0.423466
	485	PWY.8178..pentose.phosphate.pathway..non.oxidative.branch..II	Cluster	Cluster6	0.000142116	0.000114319	121	58	0.217528	0.417116	Cluster1	0.427006
	486	PWY.7323..superpathway.of.GDP.mannose.derived.O.antigen.building.blocks.biosynthesis	Cluster	Cluster6	2.92827e-05	2.36687e-05	121	27	0.219513	0.420056	Cluster1	0.430301
	487	PWY.4041...gamma..glutamyl.cycle	Cluster	Cluster4	2.05852e-05	1.67699e-05	121	48	0.224143	0.427157	Cluster1	0.436938
	488	PWY.5676..acetyl.CoA.fermentation.to.butanoate.II	Cluster	Cluster4	-1.26018e-05	1.02862e-05	121	16	0.224129	0.427157	Cluster1	0.436938
	489	PWY.5188..tetrapyrrole.biosynthesis.I..from.glutamate.	Cluster	Cluster6	6.19067e-05	5.15112e-05	121	48	0.232927	0.440579	Cluster1	0.449454
	490	PWY.7851..coenzyme.A.biosynthesis.II..eukaryotic.	Cluster	Cluster3	0.000242442	0.00020133	121	117	0.231674	0.440579	Cluster1	0.44912
	491	PWY0.1298..superpathway.of.pyrimidine.deoxyribonucleosides.degradation	Cluster	Cluster6	3.76655e-05	3.13542e-05	121	45	0.233081	0.440579	Cluster1	0.449454
	492	TRNA.CHARGING.PWY..tRNA.charging	Cluster	Cluster3	0.000470136	0.000391605	121	115	0.232398	0.440579	Cluster1	0.449454
	493	PWY.5384..sucrose.degradation.IV..sucrose.phosphorylase.	Cluster	Cluster6	-0.000185855	0.000156094	121	58	0.237462	0.44795	Cluster1	0.455013
	494	POLYISOPRENSYN.PWY..polyisoprenoid.biosynthesis..E..coli.	Cluster	Cluster6	4.96545e-05	4.20927e-05	121	31	0.241741	0.453031	Cluster1	0.460388
	495	PWY.7282..4.amino.2.methyl.5.diphosphomethylpyrimidine.biosynthesis.II	Cluster	Cluster4	2.21634e-05	1.87905e-05	121	33	0.241207	0.453031	Cluster1	0.460307
	496	RIBOSYN2.PWY..flavin.biosynthesis.I..bacteria.and.plants.	Cluster	Cluster4	-4.97244e-05	4.21581e-05	121	70	0.240721	0.453031	Cluster1	0.459693
	497	RIBOSYN2.PWY..flavin.biosynthesis.I..bacteria.and.plants.	Cluster	Cluster3	-0.000141503	0.000120344	121	70	0.242104	0.453031	Cluster1	0.460768
	498	PWY.6901..superpathway.of.glucose.and.xylose.degradation	Cluster	Cluster6	4.40059e-05	3.74009e-05	121	32	0.242855	0.453525	Cluster1	0.461261
	499	PHOSLIPSYN.PWY..superpathway.of.phospholipid.biosynthesis.I..bacteria.	Cluster	Cluster6	5.30415e-05	4.52085e-05	121	42	0.244199	0.45421	Cluster1	0.462875
	500	SER.GLYSYN.PWY..superpathway.of.L.serine.and.glycine.biosynthesis.I	Cluster	Cluster6	8.07246e-05	6.87868e-05	121	57	0.244086	0.45421	Cluster1	0.462875
	501	PWY.7210..pyrimidine.deoxyribonucleotides.biosynthesis.from.CTP	Cluster	Cluster3	-6.13597e-05	5.2522e-05	121	17	0.245687	0.456065	Cluster1	0.465067
	502	PWY.7198..pyrimidine.deoxyribonucleotides.de.novo.biosynthesis.IV	Cluster	Cluster2	-3.85195e-05	3.30598e-05	121	69	0.246781	0.457185	Cluster1	0.466511
	503	PWY0.1297..superpathway.of.purine.deoxyribonucleosides.degradation	Cluster	Cluster6	4.4205e-05	3.80186e-05	121	40	0.248358	0.45919	Cluster1	0.467918
	504	UNINTEGRATED	Cluster	Cluster3	-0.0119955	0.0104553	121	121	0.253634	0.468015	Cluster1	0.475667
	505	PWY.5676..acetyl.CoA.fermentation.to.butanoate.II	Cluster	Cluster2	-1.41152e-05	1.23034e-05	121	16	0.254229	0.468183	Cluster1	0.476424
	506	PWY.5918..superpathway.of.heme.b.biosynthesis.from.glutamate	Cluster	Cluster6	3.96389e-05	3.51138e-05	121	29	0.262383	0.482246	Cluster1	0.488773
	507	PWY4FS.7..phosphatidylglycerol.biosynthesis.I..plastidic.	Cluster	Cluster4	3.36001e-05	3.02488e-05	121	52	0.269976	0.494262	Cluster1	0.497656
	508	PWY4FS.8..phosphatidylglycerol.biosynthesis.II..non.plastidic.	Cluster	Cluster4	3.35996e-05	3.02488e-05	121	52	0.269984	0.494262	Cluster1	0.497656
	509	ARGSYN.PWY..L.arginine.biosynthesis.I..via.L.ornithine.	Cluster	Cluster6	5.31182e-05	4.82464e-05	121	23	0.273994	0.500618	Cluster1	0.503539
	510	PWY.6385..peptidoglycan.biosynthesis.III..mycobacteria.	Cluster	Cluster2	-0.000107511	9.79491e-05	121	73	0.275146	0.501736	Cluster1	0.505162
	511	PWY.7184..pyrimidine.deoxyribonucleotides.de.novo.biosynthesis.I	Cluster	Cluster3	-5.32475e-05	4.89953e-05	121	21	0.279844	0.509305	Cluster1	0.510143
	512	CITRULBIO.PWY..L.citrulline.biosynthesis	Cluster	Cluster2	5.82961e-06	5.52464e-06	121	22	0.294592	0.535099	Cluster1	0.531855
	513	PWY.7282..4.amino.2.methyl.5.diphosphomethylpyrimidine.biosynthesis.II	Cluster	Cluster2	-2.33871e-05	2.22393e-05	121	33	0.295416	0.535549	Cluster1	0.533
	514	UNINTEGRATED	Cluster	Cluster6	0.00994173	0.00951639	121	121	0.299573	0.542029	Cluster1	0.539461
	515	P461.PWY..hexitol.fermentation.to.lactate..formate..ethanol.and.acetate	Cluster	Cluster2	-6.64659e-06	6.41938e-06	121	16	0.302657	0.546546	Cluster1	0.544319
	516	PWY.7345..superpathway.of.anaerobic.sucrose.degradation	Cluster	Cluster2	-2.92824e-05	2.82689e-05	121	23	0.303528	0.547056	Cluster1	0.545186
	517	PWY.6606..guanosine.nucleotides.degradation.II	Cluster	Cluster6	3.45958e-05	3.35237e-05	121	14	0.304821	0.548324	Cluster1	0.547159
	518	PWY.5695..inosine.5..phosphate.degradation	Cluster	Cluster6	0.000171905	0.000168251	121	63	0.310049	0.556652	Cluster1	0.55442
	519	PWY.6902..chitin.degradation.II..Vibrio.	Cluster	Cluster5	-7.41954e-06	7.38098e-06	121	16	0.317738	0.569358	Cluster1	0.563361
	520	PWY.7345..superpathway.of.anaerobic.sucrose.degradation	Cluster	Cluster4	-2.31347e-05	2.33655e-05	121	23	0.325783	0.582651	Cluster1	0.573795
	521	PWY.4984..urea.cycle	Cluster	Cluster2	3.83768e-06	3.9516e-06	121	21	0.331463	0.591671	Cluster1	0.580164
	522	PWY.621..sucrose.degradation.III..sucrose.invertase.	Cluster	Cluster2	-1.87425e-05	1.92899e-05	121	32	0.333649	0.594433	Cluster1	0.583627
	523	PWY.5265..peptidoglycan.biosynthesis.II..staphylococci.	Cluster	Cluster5	6.27786e-05	6.4867e-05	121	59	0.335335	0.596294	Cluster1	0.585483
	524	ANAEROFRUCAT.PWY..homolactic.fermentation	Cluster	Cluster2	-5.37214e-05	5.55683e-05	121	54	0.336185	0.596664	Cluster1	0.586238
	525	PWY.6151..S.adenosyl.L.methionine.salvage.I	Cluster	Cluster5	0.00010464	0.000109662	121	107	0.342685	0.605943	Cluster1	0.59139
	526	PWY.621..sucrose.degradation.III..sucrose.invertase.	Cluster	Cluster4	1.54635e-05	1.62062e-05	121	32	0.342716	0.605943	Cluster1	0.59139
	527	PWY.6125..superpathway.of.guanosine.nucleotides.de.novo.biosynthesis.II	Cluster	Cluster2	-3.44373e-05	3.69366e-05	121	70	0.353433	0.623705	Cluster1	0.606162
	528	PWY.6147..6.hydroxymethyl.dihydropterin.diphosphate.biosynthesis.I	Cluster	Cluster6	-0.00017406	0.000186803	121	89	0.354109	0.623715	Cluster1	0.606515
	529	P441.PWY..superpathway.of.N.acetylneuraminate.degradation	Cluster	Cluster2	-9.27408e-06	1.0038e-05	121	25	0.35832	0.629939	Cluster1	0.611931
	530	PWY0.1319..CDP.diacylglycerol.biosynthesis.II	Cluster	Cluster6	-0.000155154	0.00016917	121	93	0.360984	0.633425	Cluster1	0.615732
	531	PWY.5667..CDP.diacylglycerol.biosynthesis.I	Cluster	Cluster6	-0.000155154	0.000169425	121	92	0.361706	0.633496	Cluster1	0.616545
	532	GLUCOSE1PMETAB.PWY..glucose.and.glucose.1.phosphate.degradation	Cluster	Cluster6	0.000172168	0.000190489	121	22	0.36865	0.644445	Cluster1	0.624773
	533	COLANSYN.PWY..colanic.acid.building.blocks.biosynthesis	Cluster	Cluster6	4.65908e-05	5.23065e-05	121	41	0.375741	0.655608	Cluster1	0.633218
	534	PWY.6147..6.hydroxymethyl.dihydropterin.diphosphate.biosynthesis.I	Cluster	Cluster3	-0.000197103	0.000225844	121	89	0.3852	0.670854	Cluster1	0.646447
	535	PWY.6901..superpathway.of.glucose.and.xylose.degradation	Cluster	Cluster2	-1.50562e-05	1.73996e-05	121	32	0.388807	0.67587	Cluster1	0.652075
	536	NAGLIPASYN.PWY..lipid.IVA.biosynthesis..E..coli.	Cluster	Cluster2	-2.75763e-05	3.20137e-05	121	43	0.391008	0.676512	Cluster1	0.653852
	537	PWY.8073..lipid.IVA.biosynthesis..P..putida.	Cluster	Cluster2	-2.75763e-05	3.20137e-05	121	43	0.391008	0.676512	Cluster1	0.653852
	538	PWY66.399..gluconeogenesis.III	Cluster	Cluster4	7.0304e-06	8.16162e-06	121	17	0.391359	0.676512	Cluster1	0.654048
	539	COA.PWY..coenzyme.A.biosynthesis.I..prokaryotic.	Cluster	Cluster5	-7.08081e-05	8.30482e-05	121	117	0.396142	0.68351	Cluster1	0.659298
	540	PWY0.1586..peptidoglycan.maturation..meso.diaminopimelate.containing.	Cluster	Cluster2	-3.91048e-05	4.70692e-05	121	69	0.407992	0.701355	Cluster1	0.67389
	541	PYRIDNUCSYN.PWY..NAD.de.novo.biosynthesis.I..from.aspartate.	Cluster	Cluster2	-4.3196e-05	5.19358e-05	121	57	0.407593	0.701355	Cluster1	0.67389
	542	P461.PWY..hexitol.fermentation.to.lactate..formate..ethanol.and.acetate	Cluster	Cluster5	-5.49504e-06	6.7225e-06	121	16	0.415384	0.712146	Cluster1	0.68124
	543	PWY.7851..coenzyme.A.biosynthesis.II..eukaryotic.	Cluster	Cluster5	-6.75539e-05	8.26319e-05	121	117	0.415801	0.712146	Cluster1	0.681526
	544	P41.PWY..pyruvate.fermentation.to.acetate.and..S..lactate.I	Cluster	Cluster3	-0.000242574	0.00030172	121	116	0.42332	0.722363	Cluster1	0.686804
	545	PWY.5100..pyruvate.fermentation.to.acetate.and.lactate.II	Cluster	Cluster3	-0.00024286	0.000301788	121	117	0.422876	0.722363	Cluster1	0.686804
	546	ARGSYNBSUB.PWY..L.arginine.biosynthesis.II..acetyl.cycle.	Cluster	Cluster6	3.66729e-05	4.65272e-05	121	25	0.432737	0.737079	Cluster1	0.697891
	547	PENTOSE.P.PWY..pentose.phosphate.pathway	Cluster	Cluster6	0.000102559	0.000131221	121	59	0.436775	0.742597	Cluster1	0.701986
	548	PWY.I9..L.cysteine.biosynthesis.VI..from.L.methionine.	Cluster	Cluster4	-2.98876e-05	3.84898e-05	121	17	0.439973	0.74667	Cluster1	0.706319
	549	GLUCONEO.PWY..gluconeogenesis.I	Cluster	Cluster6	3.38072e-05	4.38099e-05	121	38	0.442461	0.748993	Cluster1	0.707868
	550	PWY.7229..superpathway.of.adenosine.nucleotides.de.novo.biosynthesis.I	Cluster	Cluster3	0.000149709	0.000194409	121	75	0.442953	0.748993	Cluster1	0.707868
	551	PPGPPMET.PWY..ppGpp.metabolism	Cluster	Cluster6	1.24625e-05	1.62799e-05	121	26	0.446145	0.753021	Cluster1	0.711352
	552	PWY.7282..4.amino.2.methyl.5.diphosphomethylpyrimidine.biosynthesis.II	Cluster	Cluster6	3.61789e-05	4.74394e-05	121	33	0.447909	0.75463	Cluster1	0.712549
	553	PWY.6609..adenine.and.adenosine.salvage.III	Cluster	Cluster2	-9.68867e-05	0.000127782	121	65	0.450196	0.75711	Cluster1	0.715376
	554	PWY.7198..pyrimidine.deoxyribonucleotides.de.novo.biosynthesis.IV	Cluster	Cluster6	-5.24326e-05	6.9968e-05	121	69	0.455877	0.765281	Cluster1	0.721956
	555	PWY.7953..UDP.N.acetylmuramoyl.pentapeptide.biosynthesis.III..meso.diaminopimelate.containing.	Cluster	Cluster2	-8.27648e-05	0.000111408	121	60	0.459323	0.769677	Cluster1	0.724555
	556	PWY.6703..preQ0.biosynthesis	Cluster	Cluster2	-2.92266e-05	3.98406e-05	121	56	0.464878	0.777584	Cluster1	0.730448
	557	PWY.6823..molybdopterin.biosynthesis	Cluster	Cluster6	2.69195e-05	3.68816e-05	121	50	0.467477	0.780527	Cluster1	0.732893
	558	P42.PWY..incomplete.reductive.TCA.cycle	Cluster	Cluster6	1.425e-05	1.97899e-05	121	24	0.473581	0.789301	Cluster1	0.739575
	559	CALVIN.PWY..Calvin.Benson.Bassham.cycle	Cluster	Cluster2	-4.7069e-05	6.59592e-05	121	54	0.476943	0.793484	Cluster1	0.744
	560	PWY.702..L.methionine.biosynthesis.II	Cluster	Cluster2	-3.00423e-05	4.24157e-05	121	16	0.48098	0.798771	Cluster1	0.748635
	561	PWY.6126..superpathway.of.adenosine.nucleotides.de.novo.biosynthesis.II	Cluster	Cluster3	9.42515e-05	0.000134864	121	75	0.486157	0.805928	Cluster1	0.752112
	562	PWY.3001..superpathway.of.L.isoleucine.biosynthesis.I	Cluster	Cluster6	4.94194e-05	7.14968e-05	121	43	0.491343	0.810213	Cluster1	0.7573
	563	PWY.7228..superpathway.of.guanosine.nucleotides.de.novo.biosynthesis.I	Cluster	Cluster3	7.85286e-05	0.00011395	121	75	0.492226	0.810213	Cluster1	0.757748
	564	PWY4FS.7..phosphatidylglycerol.biosynthesis.I..plastidic.	Cluster	Cluster6	5.25384e-05	7.59965e-05	121	52	0.491396	0.810213	Cluster1	0.7573
	565	PWY4FS.8..phosphatidylglycerol.biosynthesis.II..non.plastidic.	Cluster	Cluster6	5.25384e-05	7.59966e-05	121	52	0.491397	0.810213	Cluster1	0.7573
	566	PWY66.409..superpathway.of.purine.nucleotide.salvage	Cluster	Cluster6	4.06789e-05	5.95154e-05	121	33	0.496287	0.815455	Cluster1	0.760667
	567	THISYNARA.PWY..superpathway.of.thiamine.diphosphate.biosynthesis.III..eukaryotes.	Cluster	Cluster2	-2.68687e-05	4.01463e-05	121	57	0.504942	0.828212	Cluster1	0.769357
	568	PWY.6628..superpathway.of.L.phenylalanine.biosynthesis	Cluster	Cluster6	6.01096e-05	9.03354e-05	121	46	0.507788	0.831413	Cluster1	0.772398
	569	PWY.7560..methylerythritol.phosphate.pathway.II	Cluster	Cluster2	-3.64368e-05	5.50946e-05	121	56	0.50975	0.833159	Cluster1	0.77422
	570	PWY.5667..CDP.diacylglycerol.biosynthesis.I	Cluster	Cluster4	-4.31012e-05	6.57035e-05	121	92	0.513137	0.83564	Cluster1	0.776334
	571	PWY.6700..queuosine.biosynthesis.I..de.novo.	Cluster	Cluster2	-4.3811e-05	6.69062e-05	121	59	0.513964	0.83564	Cluster1	0.776748
	572	PWY66.389..phytol.degradation	Cluster	Cluster2	3.99174e-06	6.07972e-06	121	39	0.513435	0.83564	Cluster1	0.776367
	573	PWY.5659..GDP.mannose.biosynthesis	Cluster	Cluster6	4.22455e-05	6.47829e-05	121	48	0.516179	0.837515	Cluster1	0.779259
	574	PYRIDNUCSYN.PWY..NAD.de.novo.biosynthesis.I..from.aspartate.	Cluster	Cluster6	7.15106e-05	0.000109838	121	57	0.516918	0.837515	Cluster1	0.779955
	575	PWY.6270..isoprene.biosynthesis.I	Cluster	Cluster2	-3.58129e-05	5.67732e-05	121	56	0.529461	0.856345	Cluster1	0.792078
	576	PWY.7663..gondoate.biosynthesis..anaerobic.	Cluster	Cluster2	-2.1698e-05	3.47276e-05	121	57	0.533625	0.861582	Cluster1	0.795767
	577	PWY.5659..GDP.mannose.biosynthesis	Cluster	Cluster3	4.4419e-05	7.13095e-05	121	48	0.534581	0.861629	Cluster1	0.796347
	578	PWY.702..L.methionine.biosynthesis.II	Cluster	Cluster4	-2.1748e-05	3.50174e-05	121	16	0.536793	0.863698	Cluster1	0.797951
	579	P124.PWY..Bifidobacterium.shunt	Cluster	Cluster2	-5.17902e-05	8.48523e-05	121	58	0.542834	0.87191	Cluster1	0.804803
	580	PWY.6588..pyruvate.fermentation.to.acetone	Cluster	Cluster2	2.74083e-06	4.54521e-06	121	21	0.546553	0.876369	Cluster1	0.807566
	581	PWY.5189..tetrapyrrole.biosynthesis.II..from.glycine.	Cluster	Cluster3	2.70467e-05	4.50089e-05	121	45	0.549082	0.877399	Cluster1	0.808052
	582	PWY.5695..inosine.5..phosphate.degradation	Cluster	Cluster2	-4.79281e-05	7.95476e-05	121	63	0.548227	0.877399	Cluster1	0.808052
	583	PWY0.1319..CDP.diacylglycerol.biosynthesis.II	Cluster	Cluster4	-3.91994e-05	6.56045e-05	121	93	0.551341	0.879498	Cluster1	0.809305
	584	ARGSYN.PWY..L.arginine.biosynthesis.I..via.L.ornithine.	Cluster	Cluster4	1.13899e-05	1.91084e-05	121	23	0.553004	0.879573	Cluster1	0.810458
	585	POLYAMINSYN3.PWY..superpathway.of.polyamine.biosynthesis.II	Cluster	Cluster2	1.51844e-06	2.54863e-06	121	14	0.55328	0.879573	Cluster1	0.810458
	586	PWY.8187..L.arginine.degradation.XIII..reductive.Stickland.reaction.	Cluster	Cluster2	-3.43949e-05	5.80277e-05	121	69	0.554832	0.880536	Cluster1	0.811562
	587	PWY.7345..superpathway.of.anaerobic.sucrose.degradation	Cluster	Cluster3	-4.22518e-05	7.16811e-05	121	23	0.557096	0.882622	Cluster1	0.813724
	588	CALVIN.PWY..Calvin.Benson.Bassham.cycle	Cluster	Cluster6	8.45745e-05	0.000146191	121	54	0.564571	0.88691	Cluster1	0.818889
	589	PWY.6270..isoprene.biosynthesis.I	Cluster	Cluster3	8.12506e-05	0.000140613	121	56	0.564515	0.88691	Cluster1	0.818889
	590	PWY.6630..superpathway.of.L.tyrosine.biosynthesis	Cluster	Cluster3	5.38921e-05	9.31169e-05	121	47	0.563902	0.88691	Cluster1	0.818889
	591	PWY.7220..adenosine.deoxyribonucleotides.de.novo.biosynthesis.II	Cluster	Cluster3	4.16976e-05	7.21457e-05	121	75	0.564527	0.88691	Cluster1	0.818889
	592	PWY.7222..guanosine.deoxyribonucleotides.de.novo.biosynthesis.II	Cluster	Cluster3	4.16976e-05	7.21457e-05	121	75	0.564527	0.88691	Cluster1	0.818889
	593	NAGLIPASYN.PWY..lipid.IVA.biosynthesis..E..coli.	Cluster	Cluster6	3.92009e-05	6.82462e-05	121	43	0.567294	0.888187	Cluster1	0.821568
	594	PWY.8073..lipid.IVA.biosynthesis..P..putida.	Cluster	Cluster6	3.92009e-05	6.82462e-05	121	43	0.567294	0.888187	Cluster1	0.821568
	595	PWY.7560..methylerythritol.phosphate.pathway.II	Cluster	Cluster3	7.7766e-05	0.000136394	121	56	0.569689	0.889885	Cluster1	0.824211
	596	TRNA.CHARGING.PWY..tRNA.charging	Cluster	Cluster5	-9.14963e-05	0.000160729	121	115	0.570292	0.889885	Cluster1	0.824211
	597	COMPLETE.ARO.PWY..superpathway.of.aromatic.amino.acid.biosynthesis	Cluster	Cluster6	7.95443e-05	0.000141007	121	57	0.574313	0.894658	Cluster1	0.828744
	598	PWY.1269..CMP.3.deoxy.D.manno.octulosonate.biosynthesis	Cluster	Cluster2	-9.06376e-06	1.61515e-05	121	46	0.575783	0.895449	Cluster1	0.83044
	599	TRNA.CHARGING.PWY..tRNA.charging	Cluster	Cluster4	-6.98304e-05	0.000125982	121	115	0.580456	0.901209	Cluster1	0.83461
	600	PWY.6902..chitin.degradation.II..Vibrio.	Cluster	Cluster3	-9.84173e-06	1.79848e-05	121	16	0.585709	0.907848	Cluster1	0.840014
	601	PWY.6630..superpathway.of.L.tyrosine.biosynthesis	Cluster	Cluster2	2.03339e-05	3.75036e-05	121	47	0.588799	0.910528	Cluster1	0.843896
	602	PWY.7345..superpathway.of.anaerobic.sucrose.degradation	Cluster	Cluster5	-1.59365e-05	2.94179e-05	121	23	0.589396	0.910528	Cluster1	0.843896
	603	GLYCOGENSYNTH.PWY..glycogen.biosynthesis.I..from.ADP.D.Glucose.	Cluster	Cluster6	0.000109752	0.000204269	121	68	0.592489	0.910869	Cluster1	0.845855
	604	HSERMETANA.PWY..L.methionine.biosynthesis.III	Cluster	Cluster2	-2.15898e-05	4.0225e-05	121	60	0.59272	0.910869	Cluster1	0.845855
	605	PWY.5188..tetrapyrrole.biosynthesis.I..from.glutamate.	Cluster	Cluster3	2.9731e-05	5.5549e-05	121	48	0.593534	0.910869	Cluster1	0.846057
	606	PWY.6630..superpathway.of.L.tyrosine.biosynthesis	Cluster	Cluster6	4.37143e-05	8.14346e-05	121	47	0.592947	0.910869	Cluster1	0.845855
	607	PHOSLIPSYN.PWY..superpathway.of.phospholipid.biosynthesis.I..bacteria.	Cluster	Cluster3	2.71351e-05	5.1178e-05	121	42	0.596995	0.913917	Cluster1	0.848838
	608	PWY.702..L.methionine.biosynthesis.II	Cluster	Cluster3	-5.70596e-05	0.000107657	121	16	0.597488	0.913917	Cluster1	0.84911
	609	PWY.7357..thiamine.phosphate.formation.from.pyrithiamine.and.oxythiamine..yeast.	Cluster	Cluster2	-3.77323e-05	7.13581e-05	121	65	0.598468	0.913917	Cluster1	0.850072
	610	DTDPRHAMSYN.PWY..dTDP..beta..L.rhamnose.biosynthesis	Cluster	Cluster2	-3.6242e-05	6.88448e-05	121	71	0.599951	0.914679	Cluster1	0.850888
	611	PWY.7238..sucrose.biosynthesis.II	Cluster	Cluster6	0.000219066	0.000421341	121	79	0.604585	0.920236	Cluster1	0.856166
	612	PWY.5973..cis.vaccenate.biosynthesis	Cluster	Cluster5	-3.32753e-05	6.46709e-05	121	71	0.607978	0.922473	Cluster1	0.860104
	613	RIBOSYN2.PWY..flavin.biosynthesis.I..bacteria.and.plants.	Cluster	Cluster5	2.55512e-05	4.98206e-05	121	70	0.60903	0.922473	Cluster1	0.860293
	614	SER.GLYSYN.PWY..superpathway.of.L.serine.and.glycine.biosynthesis.I	Cluster	Cluster3	3.87656e-05	7.55059e-05	121	57	0.608648	0.922473	Cluster1	0.860186
	615	PWY4LZ.257..superpathway.of.fermentation..Chlamydomonas.reinhardtii.	Cluster	Cluster4	3.59923e-06	7.02908e-06	121	16	0.610345	0.922961	Cluster1	0.861285
	616	COLANSYN.PWY..colanic.acid.building.blocks.biosynthesis	Cluster	Cluster3	3.00677e-05	5.92882e-05	121	41	0.613032	0.925519	Cluster1	0.864209
	617	PWY.5913..partial.TCA.cycle..obligate.autotrophs.	Cluster	Cluster2	1.26848e-05	2.52654e-05	121	28	0.616687	0.925588	Cluster1	0.86641
	618	PWY.7184..pyrimidine.deoxyribonucleotides.de.novo.biosynthesis.I	Cluster	Cluster6	-2.04383e-05	4.07187e-05	121	21	0.617059	0.925588	Cluster1	0.86641
	619	PWY.I9..L.cysteine.biosynthesis.VI..from.L.methionine.	Cluster	Cluster3	-5.87705e-05	0.000116655	121	17	0.615568	0.925588	Cluster1	0.86641
	620	PWY0.301..L.ascorbate.degradation.I..bacterial..anaerobic.	Cluster	Cluster6	2.14287e-05	4.2581e-05	121	28	0.616208	0.925588	Cluster1	0.86641
	621	DTDPRHAMSYN.PWY..dTDP..beta..L.rhamnose.biosynthesis	Cluster	Cluster3	-8.57469e-05	0.000173642	121	71	0.622575	0.932358	Cluster1	0.872412
	622	COMPLETE.ARO.PWY..superpathway.of.aromatic.amino.acid.biosynthesis	Cluster	Cluster3	7.96482e-05	0.000163177	121	57	0.62643	0.936624	Cluster1	0.87346
	623	PWY.6163..chorismate.biosynthesis.from.3.dehydroquinate	Cluster	Cluster3	0.000112949	0.000232352	121	65	0.627959	0.937402	Cluster1	0.874724
	624	PWY.6700..queuosine.biosynthesis.I..de.novo.	Cluster	Cluster3	7.99197e-05	0.000166035	121	59	0.631201	0.940732	Cluster1	0.8775
	625	PWY.6121..5.aminoimidazole.ribonucleotide.biosynthesis.I	Cluster	Cluster6	0.000122339	0.000255083	121	77	0.632856	0.94169	Cluster1	0.879367
	626	PWY.241..C4.photosynthetic.carbon.assimilation.cycle..NADP.ME.type	Cluster	Cluster3	3.60824e-05	7.63032e-05	121	49	0.637225	0.946676	Cluster1	0.88369
	627	PWY0.862...5Z..dodecenoate.biosynthesis.I	Cluster	Cluster4	3.14258e-06	6.66612e-06	121	19	0.638559	0.947145	Cluster1	0.88398
	628	PPGPPMET.PWY..ppGpp.metabolism	Cluster	Cluster2	3.62244e-06	7.73609e-06	121	26	0.640667	0.948758	Cluster1	0.884992
	629	PWY.5941..glycogen.degradation.II	Cluster	Cluster6	0.000156965	0.000338944	121	79	0.644571	0.950001	Cluster1	0.888181
	630	PWY.6628..superpathway.of.L.phenylalanine.biosynthesis	Cluster	Cluster3	4.85147e-05	0.000104534	121	46	0.643477	0.950001	Cluster1	0.887543
	631	PWY.841..superpathway.of.purine.nucleotides.de.novo.biosynthesis.I	Cluster	Cluster6	4.5765e-05	9.87964e-05	121	57	0.644509	0.950001	Cluster1	0.888181
	632	ARO.PWY..chorismate.biosynthesis.I	Cluster	Cluster6	8.95008e-05	0.000194555	121	64	0.646761	0.95067	Cluster1	0.889443
	633	PWY.841..superpathway.of.purine.nucleotides.de.novo.biosynthesis.I	Cluster	Cluster3	5.10665e-05	0.000111244	121	57	0.647069	0.95067	Cluster1	0.889443
	634	P441.PWY..superpathway.of.N.acetylneuraminate.degradation	Cluster	Cluster4	3.78322e-06	8.29508e-06	121	25	0.649769	0.953131	Cluster1	0.891845
	635	ARGSYNBSUB.PWY..L.arginine.biosynthesis.II..acetyl.cycle.	Cluster	Cluster4	8.31801e-06	1.84044e-05	121	25	0.652676	0.954232	Cluster1	0.893655
	636	PWY.241..C4.photosynthetic.carbon.assimilation.cycle..NADP.ME.type	Cluster	Cluster6	2.97349e-05	6.5628e-05	121	49	0.651725	0.954232	Cluster1	0.893655
	637	PWY.5981..CDP.diacylglycerol.biosynthesis.III	Cluster	Cluster2	-2.91713e-05	6.4971e-05	121	45	0.654623	0.954232	Cluster1	0.895013
	638	PWY.7560..methylerythritol.phosphate.pathway.II	Cluster	Cluster6	5.45881e-05	0.000121194	121	56	0.65366	0.954232	Cluster1	0.89415
	639	PWY0.162..superpathway.of.pyrimidine.ribonucleotides.de.novo.biosynthesis	Cluster	Cluster2	-2.82588e-05	6.35674e-05	121	62	0.657506	0.956934	Cluster1	0.896774
	640	FERMENTATION.PWY..mixed.acid.fermentation	Cluster	Cluster2	8.47122e-06	1.94864e-05	121	29	0.66473	0.959936	Cluster1	0.900137
	641	HISTSYN.PWY..L.histidine.biosynthesis	Cluster	Cluster6	1.59497e-05	3.6395e-05	121	14	0.662303	0.959936	Cluster1	0.900137
	642	OANTIGEN.PWY..O.antigen.building.blocks.biosynthesis..E..coli.	Cluster	Cluster3	-8.68417e-05	0.000198799	121	70	0.663191	0.959936	Cluster1	0.900137
	643	PWY.6163..chorismate.biosynthesis.from.3.dehydroquinate	Cluster	Cluster6	8.4731e-05	0.000194274	121	65	0.663956	0.959936	Cluster1	0.900137
	644	PWY.6902..chitin.degradation.II..Vibrio.	Cluster	Cluster6	6.51923e-06	1.48734e-05	121	16	0.662297	0.959936	Cluster1	0.900137
	645	NONMEVIPP.PWY..methylerythritol.phosphate.pathway.I	Cluster	Cluster3	7.14361e-05	0.00016534	121	60	0.666637	0.961197	Cluster1	0.901788
	646	PWY.6270..isoprene.biosynthesis.I	Cluster	Cluster6	5.35982e-05	0.000124621	121	56	0.668318	0.96213	Cluster1	0.90276
	647	NONOXIPENT.PWY..pentose.phosphate.pathway..non.oxidative.branch..I	Cluster	Cluster3	6.26353e-05	0.000148328	121	61	0.673613	0.967502	Cluster1	0.90556
	648	THISYNARA.PWY..superpathway.of.thiamine.diphosphate.biosynthesis.III..eukaryotes.	Cluster	Cluster6	-3.56847e-05	8.45552e-05	121	57	0.67413	0.967502	Cluster1	0.905822
	649	PWY.5676..acetyl.CoA.fermentation.to.butanoate.II	Cluster	Cluster3	-1.28375e-05	3.093e-05	121	16	0.678984	0.972967	Cluster1	0.907141
	650	PWY.5265..peptidoglycan.biosynthesis.II..staphylococci.	Cluster	Cluster2	-2.60755e-05	6.31784e-05	121	59	0.680679	0.973895	Cluster1	0.90768
	651	PWY.621..sucrose.degradation.III..sucrose.invertase.	Cluster	Cluster5	8.12685e-06	1.98584e-05	121	32	0.683209	0.976013	Cluster1	0.910622
	652	X1CMET2.PWY..folate.transformations.III..E..coli.	Cluster	Cluster2	5.61842e-06	1.38585e-05	121	20	0.686386	0.977549	Cluster1	0.913124
	653	P461.PWY..hexitol.fermentation.to.lactate..formate..ethanol.and.acetate	Cluster	Cluster3	-6.64659e-06	1.63789e-05	121	16	0.685642	0.977549	Cluster1	0.912566
	654	PWY.7229..superpathway.of.adenosine.nucleotides.de.novo.biosynthesis.I	Cluster	Cluster6	-6.59751e-05	0.000164849	121	75	0.690087	0.979235	Cluster1	0.9139
	655	PWY.8178..pentose.phosphate.pathway..non.oxidative.branch..II	Cluster	Cluster2	-2.05426e-05	5.14998e-05	121	58	0.690729	0.979235	Cluster1	0.9139
	656	PWY0.1296..purine.ribonucleosides.degradation	Cluster	Cluster2	-1.09549e-05	2.7381e-05	121	55	0.689903	0.979235	Cluster1	0.9139
	657	OANTIGEN.PWY..O.antigen.building.blocks.biosynthesis..E..coli.	Cluster	Cluster2	-3.12146e-05	7.9023e-05	121	70	0.693786	0.981897	Cluster1	0.91527
	658	P124.PWY..Bifidobacterium.shunt	Cluster	Cluster6	7.55999e-05	0.000192172	121	58	0.695082	0.981897	Cluster1	0.916022
	659	P441.PWY..superpathway.of.N.acetylneuraminate.degradation	Cluster	Cluster3	-9.83821e-06	2.54577e-05	121	25	0.700078	0.981897	Cluster1	0.91873
	660	P461.PWY..hexitol.fermentation.to.lactate..formate..ethanol.and.acetate	Cluster	Cluster4	-2.02036e-06	5.26918e-06	121	16	0.702109	0.981897	Cluster1	0.919182
	661	PWY.5121..superpathway.of.geranylgeranyl.diphosphate.biosynthesis.II..via.MEP.	Cluster	Cluster2	9.26702e-06	2.39402e-05	121	24	0.699457	0.981897	Cluster1	0.91873
	662	PWY.6122..5.aminoimidazole.ribonucleotide.biosynthesis.II	Cluster	Cluster6	0.000103	0.000267906	121	82	0.701653	0.981897	Cluster1	0.919182
	663	PWY.6277..superpathway.of.5.aminoimidazole.ribonucleotide.biosynthesis	Cluster	Cluster6	0.000103	0.000267906	121	82	0.701653	0.981897	Cluster1	0.919182
	664	PWY.7198..pyrimidine.deoxyribonucleotides.de.novo.biosynthesis.IV	Cluster	Cluster3	-3.21063e-05	8.27486e-05	121	69	0.698795	0.981897	Cluster1	0.91873
	665	UDPNAGSYN.PWY..UDP.N.acetyl.D.glucosamine.biosynthesis.I	Cluster	Cluster5	-5.02746e-05	0.000130039	121	118	0.699836	0.981897	Cluster1	0.91873
	666	ARO.PWY..chorismate.biosynthesis.I	Cluster	Cluster3	8.56493e-05	0.000234111	121	64	0.715297	0.988369	Cluster1	0.927595
	667	ASPASN.PWY..superpathway.of.L.aspartate.and.L.asparagine.biosynthesis	Cluster	Cluster3	-3.45839e-05	9.62671e-05	121	67	0.720125	0.988369	Cluster1	0.929144
	668	CALVIN.PWY..Calvin.Benson.Bassham.cycle	Cluster	Cluster3	5.6382e-05	0.000163043	121	54	0.730118	0.988369	Cluster1	0.931087
	669	GLYCOLYSIS.E.D..superpathway.of.glycolysis.and.the.Entner.Doudoroff.pathway	Cluster	Cluster2	3.12695e-06	8.51472e-06	121	24	0.714115	0.988369	Cluster1	0.927195
	670	PENTOSE.P.PWY..pentose.phosphate.pathway	Cluster	Cluster2	-2.06218e-05	5.80039e-05	121	59	0.722851	0.988369	Cluster1	0.929507
	671	PENTOSE.P.PWY..pentose.phosphate.pathway	Cluster	Cluster3	5.14663e-05	0.000142852	121	59	0.719302	0.988369	Cluster1	0.929144
	672	PWY.1269..CMP.3.deoxy.D.manno.octulosonate.biosynthesis	Cluster	Cluster3	1.4401e-05	3.98369e-05	121	46	0.71839	0.988369	Cluster1	0.929144
	673	PWY.5005..biotin.biosynthesis.II	Cluster	Cluster2	2.39367e-06	6.61644e-06	121	25	0.718262	0.988369	Cluster1	0.929144
	674	PWY.5030..L.histidine.degradation.III	Cluster	Cluster3	2.62482e-05	7.17779e-05	121	42	0.715282	0.988369	Cluster1	0.927595
	675	PWY.5686..UMP.biosynthesis.I	Cluster	Cluster5	5.29199e-05	0.000151062	121	116	0.726913	0.988369	Cluster1	0.930831
	676	PWY.5918..superpathway.of.heme.b.biosynthesis.from.glutamate	Cluster	Cluster2	5.72205e-06	1.60531e-05	121	29	0.722186	0.988369	Cluster1	0.92948
	677	PWY.6608..guanosine.nucleotides.degradation.III	Cluster	Cluster3	3.23263e-05	9.2244e-05	121	52	0.726686	0.988369	Cluster1	0.930831
	678	PWY.6628..superpathway.of.L.phenylalanine.biosynthesis	Cluster	Cluster2	1.46724e-05	4.19979e-05	121	46	0.727512	0.988369	Cluster1	0.930831
	679	PWY.7111..pyruvate.fermentation.to.isobutanol..engineered.	Cluster	Cluster2	-1.0867e-05	3.09138e-05	121	52	0.725967	0.988369	Cluster1	0.930831
	680	PWY.7790..UMP.biosynthesis.II	Cluster	Cluster5	4.95419e-05	0.000137284	121	116	0.718901	0.988369	Cluster1	0.929144
	681	PWY.7791..UMP.biosynthesis.III	Cluster	Cluster5	4.93658e-05	0.000137328	121	116	0.719944	0.988369	Cluster1	0.929144
	682	PWY.7953..UDP.N.acetylmuramoyl.pentapeptide.biosynthesis.III..meso.diaminopimelate.containing.	Cluster	Cluster6	8.21695e-05	0.000235813	121	60	0.728446	0.988369	Cluster1	0.930851
	683	PWY.8004..Entner.Doudoroff.pathway.I	Cluster	Cluster2	2.46045e-06	7.04139e-06	121	24	0.727408	0.988369	Cluster1	0.930831
	684	PWY.I9..L.cysteine.biosynthesis.VI..from.L.methionine.	Cluster	Cluster2	-1.61427e-05	4.62492e-05	121	17	0.72792	0.988369	Cluster1	0.930851
	685	PWY0.1061..superpathway.of.L.alanine.biosynthesis	Cluster	Cluster6	6.1188e-05	0.000164008	121	67	0.710068	0.988369	Cluster1	0.922793
	686	PWY0.162..superpathway.of.pyrimidine.ribonucleotides.de.novo.biosynthesis	Cluster	Cluster6	5.24549e-05	0.000139991	121	62	0.708915	0.988369	Cluster1	0.922148
	687	PWY66.409..superpathway.of.purine.nucleotide.salvage	Cluster	Cluster3	2.28685e-05	6.59167e-05	121	33	0.729278	0.988369	Cluster1	0.930972
	688	PWY.5030..L.histidine.degradation.III	Cluster	Cluster6	2.13874e-05	6.25955e-05	121	42	0.733478	0.991475	Cluster1	0.932101
	689	FASYN.ELONG.PWY..fatty.acid.elongation....saturated	Cluster	Cluster4	2.34079e-06	7.03939e-06	121	16	0.740658	0.992525	Cluster1	0.935907
	690	PANTOSYN.PWY..superpathway.of.coenzyme.A.biosynthesis.I..bacteria.	Cluster	Cluster2	-2.0542e-05	6.08001e-05	121	57	0.736174	0.992525	Cluster1	0.935104
	691	PANTOSYN.PWY..superpathway.of.coenzyme.A.biosynthesis.I..bacteria.	Cluster	Cluster3	5.11598e-05	0.000151973	121	57	0.737046	0.992525	Cluster1	0.935788
	692	PWY.5189..tetrapyrrole.biosynthesis.II..from.glycine.	Cluster	Cluster2	6.08058e-06	1.83039e-05	121	45	0.740343	0.992525	Cluster1	0.935907
	693	PWY.6703..preQ0.biosynthesis	Cluster	Cluster6	2.83434e-05	8.4774e-05	121	56	0.739006	0.992525	Cluster1	0.935907
	694	PWY.8178..pentose.phosphate.pathway..non.oxidative.branch..II	Cluster	Cluster3	4.2561e-05	0.000127263	121	58	0.738662	0.992525	Cluster1	0.935907
	695	PWY.5005..biotin.biosynthesis.II	Cluster	Cluster3	5.41455e-06	1.65146e-05	121	25	0.743642	0.993038	Cluster1	0.93627
	696	PWY.6121..5.aminoimidazole.ribonucleotide.biosynthesis.I	Cluster	Cluster3	9.89169e-05	0.000306307	121	77	0.747448	0.993038	Cluster1	0.938399
	697	PWY.6897..thiamine.diphosphate.salvage.II	Cluster	Cluster6	3.05478e-05	9.44065e-05	121	50	0.747086	0.993038	Cluster1	0.938364
	698	PWY.7199..pyrimidine.deoxyribonucleosides.salvage	Cluster	Cluster2	-3.8449e-05	0.000117601	121	79	0.744346	0.993038	Cluster1	0.93627
	699	PWY.7664..oleate.biosynthesis.IV..anaerobic.	Cluster	Cluster4	2.19015e-06	6.73246e-06	121	16	0.746056	0.993038	Cluster1	0.937879
	700	PWY0.1296..purine.ribonucleosides.degradation	Cluster	Cluster3	2.24736e-05	6.82234e-05	121	55	0.742467	0.993038	Cluster1	0.935907
	701	NONMEVIPP.PWY..methylerythritol.phosphate.pathway.I	Cluster	Cluster6	4.43381e-05	0.000138104	121	60	0.749023	0.993711	Cluster1	0.939537
	702	P42.PWY..incomplete.reductive.TCA.cycle	Cluster	Cluster3	7.24777e-06	2.29911e-05	121	24	0.753168	0.993832	Cluster1	0.941234
	703	PWY.5918..superpathway.of.heme.b.biosynthesis.from.glutamate	Cluster	Cluster3	1.25749e-05	3.97903e-05	121	29	0.752557	0.993832	Cluster1	0.941234
	704	PWY.6121..5.aminoimidazole.ribonucleotide.biosynthesis.I	Cluster	Cluster2	3.86645e-05	0.000121642	121	77	0.751367	0.993832	Cluster1	0.941217
	705	PWY.6606..guanosine.nucleotides.degradation.II	Cluster	Cluster5	5.23376e-06	1.66026e-05	121	14	0.753389	0.993832	Cluster1	0.941234
	706	P42.PWY..incomplete.reductive.TCA.cycle	Cluster	Cluster2	2.88139e-06	9.22875e-06	121	24	0.755488	0.995189	Cluster1	0.942599
	707	ILEUSYN.PWY..L.isoleucine.biosynthesis.I..from.threonine.	Cluster	Cluster2	-1.04381e-05	3.42089e-05	121	52	0.760927	0.998113	Cluster1	0.943744
	708	PWY.5695..inosine.5..phosphate.degradation	Cluster	Cluster3	6.09447e-05	0.000199163	121	63	0.760203	0.998113	Cluster1	0.943744
	709	PWY.621..sucrose.degradation.III..sucrose.invertase.	Cluster	Cluster3	-1.47688e-05	4.83273e-05	121	32	0.760514	0.998113	Cluster1	0.943744
	710	FASYN.ELONG.PWY..fatty.acid.elongation....saturated	Cluster	Cluster2	-2.36742e-06	8.51995e-06	121	16	0.781916	0.999912	Cluster1	0.953601
	711	HEMESYN2.PWY..heme.b.biosynthesis.II..oxygen.independent.	Cluster	Cluster2	4.21975e-06	1.4075e-05	121	32	0.764893	0.999912	Cluster1	0.947187
	712	HEMESYN2.PWY..heme.b.biosynthesis.II..oxygen.independent.	Cluster	Cluster3	9.60469e-06	3.49239e-05	121	32	0.783802	0.999912	Cluster1	0.953683
	713	PWY.3001..superpathway.of.L.isoleucine.biosynthesis.I	Cluster	Cluster2	-9.65888e-06	3.41372e-05	121	43	0.777941	0.999912	Cluster1	0.95321
	714	PWY.5659..GDP.mannose.biosynthesis	Cluster	Cluster2	-8.55117e-06	2.89077e-05	121	48	0.767914	0.999912	Cluster1	0.949255
	715	PWY.5667..CDP.diacylglycerol.biosynthesis.I	Cluster	Cluster5	-2.43544e-05	8.38255e-05	121	92	0.771929	0.999912	Cluster1	0.949535
	716	PWY.5676..acetyl.CoA.fermentation.to.butanoate.II	Cluster	Cluster5	3.68714e-06	1.27015e-05	121	16	0.772194	0.999912	Cluster1	0.949535
	717	PWY.5913..partial.TCA.cycle..obligate.autotrophs.	Cluster	Cluster3	1.76158e-05	6.29918e-05	121	28	0.780269	0.999912	Cluster1	0.95321
	718	PWY.6125..superpathway.of.guanosine.nucleotides.de.novo.biosynthesis.II	Cluster	Cluster3	-2.57569e-05	9.24087e-05	121	70	0.780993	0.999912	Cluster1	0.953583
	719	PWY.6126..superpathway.of.adenosine.nucleotides.de.novo.biosynthesis.II	Cluster	Cluster6	-3.1813e-05	0.000114173	121	75	0.781253	0.999912	Cluster1	0.953583
	720	PWY.6282..palmitoleate.biosynthesis.I..from..5Z..dodec.5.enoate.	Cluster	Cluster4	1.91399e-06	6.4229e-06	121	16	0.766688	0.999912	Cluster1	0.948616
	721	PWY.6700..queuosine.biosynthesis.I..de.novo.	Cluster	Cluster6	4.29192e-05	0.000145589	121	59	0.768943	0.999912	Cluster1	0.949275
	722	PWY.6823..molybdopterin.biosynthesis	Cluster	Cluster2	-5.1221e-06	1.76123e-05	121	50	0.771894	0.999912	Cluster1	0.949535
	723	PWY.6859..all.trans.farnesol.biosynthesis	Cluster	Cluster2	3.56088e-06	1.22514e-05	121	17	0.771877	0.999912	Cluster1	0.949535
	724	PWY.7238..sucrose.biosynthesis.II	Cluster	Cluster3	0.00014325	0.00050651	121	79	0.777933	0.999912	Cluster1	0.95321
	725	PWY.7357..thiamine.phosphate.formation.from.pyrithiamine.and.oxythiamine..yeast.	Cluster	Cluster3	-5.08158e-05	0.000181484	121	65	0.780139	0.999912	Cluster1	0.95321
	726	PWY.7392..taxadiene.biosynthesis..engineered.	Cluster	Cluster2	5.7769e-06	2.05934e-05	121	15	0.779611	0.999912	Cluster1	0.95321
	727	PWY0.1319..CDP.diacylglycerol.biosynthesis.II	Cluster	Cluster5	-2.3048e-05	8.36992e-05	121	93	0.783529	0.999912	Cluster1	0.953683
	728	PWY0.162..superpathway.of.pyrimidine.ribonucleotides.de.novo.biosynthesis	Cluster	Cluster3	4.4428e-05	0.000157333	121	62	0.77816	0.999912	Cluster1	0.95321
	729	VALSYN.PWY..L.valine.biosynthesis	Cluster	Cluster2	-1.07817e-05	3.69193e-05	121	57	0.770877	0.999912	Cluster1	0.949535
	730	X1CMET2.PWY..folate.transformations.III..E..coli.	Cluster	Cluster3	2.87272e-07	3.53297e-05	121	20	0.993532	1	Cluster1	1
	731	ANAEROFRUCAT.PWY..homolactic.fermentation	Cluster	Cluster6	-8.5371e-06	0.000116828	121	54	0.941931	1	Cluster1	1
	732	ANAEROFRUCAT.PWY..homolactic.fermentation	Cluster	Cluster3	-2.38057e-05	0.000139597	121	54	0.864932	1	Cluster1	0.986739
	733	ANAGLYCOLYSIS.PWY..glycolysis.III..from.glucose.	Cluster	Cluster6	2.92914e-05	0.000216485	121	60	0.892732	1	Cluster1	1
	734	ANAGLYCOLYSIS.PWY..glycolysis.III..from.glucose.	Cluster	Cluster3	1.82722e-05	0.000251153	121	60	0.942133	1	Cluster1	1
	735	ARGSYN.PWY..L.arginine.biosynthesis.I..via.L.ornithine.	Cluster	Cluster2	-9.89945e-07	2.30379e-05	121	23	0.965827	1	Cluster1	1
	736	ARGSYN.PWY..L.arginine.biosynthesis.I..via.L.ornithine.	Cluster	Cluster3	1.22598e-08	5.8256e-05	121	23	0.999833	1	Cluster1	1
	737	ARGSYNBSUB.PWY..L.arginine.biosynthesis.II..acetyl.cycle.	Cluster	Cluster2	-3.50353e-07	2.22121e-05	121	25	0.987453	1	Cluster1	1
	738	ARGSYNBSUB.PWY..L.arginine.biosynthesis.II..acetyl.cycle.	Cluster	Cluster3	-7.96111e-07	5.62126e-05	121	25	0.988731	1	Cluster1	1
	739	ARO.PWY..chorismate.biosynthesis.I	Cluster	Cluster2	1.39547e-05	9.28553e-05	121	64	0.8809	1	Cluster1	0.994246
	740	BRANCHED.CHAIN.AA.SYN.PWY..superpathway.of.branched.chain.amino.acid.biosynthesis	Cluster	Cluster2	-3.66137e-06	3.18894e-05	121	45	0.908863	1	Cluster1	1
	741	BRANCHED.CHAIN.AA.SYN.PWY..superpathway.of.branched.chain.amino.acid.biosynthesis	Cluster	Cluster3	7.50617e-06	8.0485e-05	121	45	0.925893	1	Cluster1	1
	742	CITRULBIO.PWY..L.citrulline.biosynthesis	Cluster	Cluster3	5.02974e-07	1.4034e-05	121	22	0.971492	1	Cluster1	1
	743	COLANSYN.PWY..colanic.acid.building.blocks.biosynthesis	Cluster	Cluster2	1.12417e-06	2.39183e-05	121	41	0.962597	1	Cluster1	1
	744	COMPLETE.ARO.PWY..superpathway.of.aromatic.amino.acid.biosynthesis	Cluster	Cluster2	-1.22542e-05	6.55579e-05	121	57	0.852079	1	Cluster1	0.981637
	745	DTDPRHAMSYN.PWY..dTDP..beta..L.rhamnose.biosynthesis	Cluster	Cluster6	-8.50226e-06	0.000144221	121	71	0.953134	1	Cluster1	1
	746	FASYN.ELONG.PWY..fatty.acid.elongation....saturated	Cluster	Cluster3	-1.62346e-06	2.16108e-05	121	16	0.940299	1	Cluster1	1
	747	FERMENTATION.PWY..mixed.acid.fermentation	Cluster	Cluster3	1.03975e-05	4.88341e-05	121	29	0.831807	1	Cluster1	0.976788
	748	GLUCONEO.PWY..gluconeogenesis.I	Cluster	Cluster2	-2.87904e-07	2.09091e-05	121	38	0.989049	1	Cluster1	1
	749	GLUCONEO.PWY..gluconeogenesis.I	Cluster	Cluster3	-8.39042e-06	5.29479e-05	121	38	0.874448	1	Cluster1	0.99036
	750	GLUCOSE1PMETAB.PWY..glucose.and.glucose.1.phosphate.degradation	Cluster	Cluster2	8.7525e-06	9.09645e-05	121	22	0.923572	1	Cluster1	1
	751	GLUCOSE1PMETAB.PWY..glucose.and.glucose.1.phosphate.degradation	Cluster	Cluster3	2.8877e-05	0.000229766	121	22	0.900251	1	Cluster1	1
	752	GLUTORN.PWY..L.ornithine.biosynthesis.I	Cluster	Cluster4	1.00637e-06	1.30896e-05	121	24	0.938948	1	Cluster1	1
	753	GLUTORN.PWY..L.ornithine.biosynthesis.I	Cluster	Cluster2	2.8127e-07	1.58445e-05	121	24	0.985882	1	Cluster1	1
	754	GLUTORN.PWY..L.ornithine.biosynthesis.I	Cluster	Cluster3	-1.14779e-06	4.01933e-05	121	24	0.977283	1	Cluster1	1
	755	GLYCOGENSYNTH.PWY..glycogen.biosynthesis.I..from.ADP.D.Glucose.	Cluster	Cluster2	-7.51575e-06	9.7446e-05	121	68	0.938723	1	Cluster1	1
	756	GLYCOGENSYNTH.PWY..glycogen.biosynthesis.I..from.ADP.D.Glucose.	Cluster	Cluster3	2.6586e-05	0.000246951	121	68	0.914516	1	Cluster1	1
	757	GLYCOLYSIS.E.D..superpathway.of.glycolysis.and.the.Entner.Doudoroff.pathway	Cluster	Cluster3	-7.24359e-21	2.17251e-05	121	24	1	1	Cluster1	1
	758	HEME.BIOSYNTHESIS.II..heme.b.biosynthesis.I..aerobic.	Cluster	Cluster2	2.17252e-06	1.13889e-05	121	33	0.849072	1	Cluster1	0.980181
	759	HEME.BIOSYNTHESIS.II..heme.b.biosynthesis.I..aerobic.	Cluster	Cluster3	7.00471e-06	2.82953e-05	121	33	0.804927	1	Cluster1	0.964471
	760	HISDEG.PWY..L.histidine.degradation.I	Cluster	Cluster2	-7.75621e-06	3.26716e-05	121	46	0.812871	1	Cluster1	0.969152
	761	HISDEG.PWY..L.histidine.degradation.I	Cluster	Cluster6	5.03062e-06	6.85284e-05	121	46	0.941653	1	Cluster1	1
	762	HISDEG.PWY..L.histidine.degradation.I	Cluster	Cluster3	5.87779e-06	8.22472e-05	121	46	0.943169	1	Cluster1	1
	763	HISTSYN.PWY..L.histidine.biosynthesis	Cluster	Cluster4	-2.61298e-06	1.43481e-05	121	14	0.856039	1	Cluster1	0.982405
	764	HISTSYN.PWY..L.histidine.biosynthesis	Cluster	Cluster2	-3.6892e-06	1.73564e-05	121	14	0.832222	1	Cluster1	0.976788
	765	HISTSYN.PWY..L.histidine.biosynthesis	Cluster	Cluster3	-2.00847e-06	4.40049e-05	121	14	0.963698	1	Cluster1	1
	766	HSERMETANA.PWY..L.methionine.biosynthesis.III	Cluster	Cluster6	-2.89803e-06	8.47457e-05	121	60	0.972807	1	Cluster1	1
	767	HSERMETANA.PWY..L.methionine.biosynthesis.III	Cluster	Cluster3	1.60561e-05	0.000100916	121	60	0.873898	1	Cluster1	0.990136
	768	ILEUSYN.PWY..L.isoleucine.biosynthesis.I..from.threonine.	Cluster	Cluster3	1.66926e-05	8.5706e-05	121	52	0.845955	1	Cluster1	0.980181
	769	NAGLIPASYN.PWY..lipid.IVA.biosynthesis..E..coli.	Cluster	Cluster3	9.16689e-06	7.99047e-05	121	43	0.908874	1	Cluster1	1
	770	NONMEVIPP.PWY..methylerythritol.phosphate.pathway.I	Cluster	Cluster2	-1.19473e-05	6.57597e-05	121	60	0.856241	1	Cluster1	0.982405
	771	NONOXIPENT.PWY..pentose.phosphate.pathway..non.oxidative.branch..I	Cluster	Cluster2	-1.33172e-05	6.00701e-05	121	61	0.82495	1	Cluster1	0.97266
	772	OANTIGEN.PWY..O.antigen.building.blocks.biosynthesis..E..coli.	Cluster	Cluster6	-1.34339e-05	0.000165857	121	70	0.935651	1	Cluster1	1
	773	P124.PWY..Bifidobacterium.shunt	Cluster	Cluster3	5.254e-05	0.000208936	121	58	0.801904	1	Cluster1	0.963725
	774	P164.PWY..purine.nucleobases.degradation.I..anaerobic.	Cluster	Cluster6	4.28313e-06	6.29076e-05	121	46	0.945882	1	Cluster1	1
	775	P164.PWY..purine.nucleobases.degradation.I..anaerobic.	Cluster	Cluster3	1.62562e-05	7.50041e-05	121	46	0.828838	1	Cluster1	0.975186
	776	PANTO.PWY..phosphopantothenate.biosynthesis.I	Cluster	Cluster2	7.41882e-06	7.7534e-05	121	62	0.924058	1	Cluster1	1
	777	PANTO.PWY..phosphopantothenate.biosynthesis.I	Cluster	Cluster6	4.22624e-05	0.000163885	121	62	0.797099	1	Cluster1	0.962064
	778	PANTO.PWY..phosphopantothenate.biosynthesis.I	Cluster	Cluster3	-5.17885e-06	0.000197694	121	62	0.979168	1	Cluster1	1
	779	PANTOSYN.PWY..superpathway.of.coenzyme.A.biosynthesis.I..bacteria.	Cluster	Cluster6	3.23235e-05	0.000129104	121	57	0.802963	1	Cluster1	0.96378
	780	PHOSLIPSYN.PWY..superpathway.of.phospholipid.biosynthesis.I..bacteria.	Cluster	Cluster2	-9.96833e-07	2.06512e-05	121	42	0.961588	1	Cluster1	1
	781	POLYAMINSYN3.PWY..superpathway.of.polyamine.biosynthesis.II	Cluster	Cluster6	8.6805e-09	5.38347e-06	121	14	0.998718	1	Cluster1	1
	782	POLYAMINSYN3.PWY..superpathway.of.polyamine.biosynthesis.II	Cluster	Cluster3	6.1633e-08	6.49622e-06	121	14	0.992457	1	Cluster1	1
	783	POLYISOPRENSYN.PWY..polyisoprenoid.biosynthesis..E..coli.	Cluster	Cluster2	-4.19742e-07	1.99541e-05	121	31	0.983261	1	Cluster1	1
	784	POLYISOPRENSYN.PWY..polyisoprenoid.biosynthesis..E..coli.	Cluster	Cluster3	4.19662e-06	5.00247e-05	121	31	0.933305	1	Cluster1	1
	785	PPGPPMET.PWY..ppGpp.metabolism	Cluster	Cluster3	4.10712e-06	1.94218e-05	121	26	0.832936	1	Cluster1	0.976788
	786	PWY.1042..glycolysis.IV	Cluster	Cluster4	-6.04045e-07	8.46282e-05	121	93	0.994318	1	Cluster1	1
	787	PWY.241..C4.photosynthetic.carbon.assimilation.cycle..NADP.ME.type	Cluster	Cluster2	6.89014e-06	3.0623e-05	121	49	0.822415	1	Cluster1	0.97266
	788	PWY.3001..superpathway.of.L.isoleucine.biosynthesis.I	Cluster	Cluster3	-4.64358e-06	8.63546e-05	121	43	0.957233	1	Cluster1	1
	789	PWY.4041...gamma..glutamyl.cycle	Cluster	Cluster2	-2.09965e-06	2.03659e-05	121	48	0.918165	1	Cluster1	1
	790	PWY.4041...gamma..glutamyl.cycle	Cluster	Cluster3	-2.73338e-06	5.18079e-05	121	48	0.958048	1	Cluster1	1
	791	PWY.4984..urea.cycle	Cluster	Cluster6	2.21532e-07	8.27511e-06	121	21	0.978642	1	Cluster1	1
	792	PWY.4984..urea.cycle	Cluster	Cluster3	7.74681e-07	9.98895e-06	121	21	0.938183	1	Cluster1	1
	793	PWY.5005..biotin.biosynthesis.II	Cluster	Cluster6	3.35347e-06	1.41042e-05	121	25	0.812686	1	Cluster1	0.969152
	794	PWY.5030..L.histidine.degradation.III	Cluster	Cluster2	6.34206e-06	2.88929e-05	121	42	0.826668	1	Cluster1	0.973916
	795	PWY.5103..L.isoleucine.biosynthesis.III	Cluster	Cluster2	-8.45853e-06	3.12077e-05	121	52	0.786938	1	Cluster1	0.95513
	796	PWY.5103..L.isoleucine.biosynthesis.III	Cluster	Cluster3	1.57902e-05	7.81624e-05	121	52	0.840294	1	Cluster1	0.978102
	797	PWY.5121..superpathway.of.geranylgeranyl.diphosphate.biosynthesis.II..via.MEP.	Cluster	Cluster6	5.58285e-06	5.15833e-05	121	24	0.914089	1	Cluster1	1
	798	PWY.5121..superpathway.of.geranylgeranyl.diphosphate.biosynthesis.II..via.MEP.	Cluster	Cluster3	1.5046e-05	5.95592e-05	121	24	0.801022	1	Cluster1	0.963076
	799	PWY.5130..2.oxobutanoate.degradation.I	Cluster	Cluster2	7.91658e-07	7.65382e-06	121	24	0.917822	1	Cluster1	1
	800	PWY.5130..2.oxobutanoate.degradation.I	Cluster	Cluster6	1.55809e-06	1.62218e-05	121	24	0.923712	1	Cluster1	1
	801	PWY.5130..2.oxobutanoate.degradation.I	Cluster	Cluster3	2.46799e-06	1.91456e-05	121	24	0.897671	1	Cluster1	1
	802	PWY.5188..tetrapyrrole.biosynthesis.I..from.glutamate.	Cluster	Cluster2	4.26944e-06	2.2585e-05	121	48	0.850396	1	Cluster1	0.980904
	803	PWY.5265..peptidoglycan.biosynthesis.II..staphylococci.	Cluster	Cluster6	9.46037e-06	0.000134636	121	59	0.944169	1	Cluster1	1
	804	PWY.5265..peptidoglycan.biosynthesis.II..staphylococci.	Cluster	Cluster3	-1.8024e-05	0.000157709	121	59	0.909222	1	Cluster1	1
	805	PWY.5484..glycolysis.II..from.fructose.6.phosphate.	Cluster	Cluster6	-2.32211e-05	0.000141397	121	58	0.869988	1	Cluster1	0.988894
	806	PWY.5484..glycolysis.II..from.fructose.6.phosphate.	Cluster	Cluster3	-3.65877e-05	0.000160602	121	58	0.820197	1	Cluster1	0.97266
	807	PWY.5676..acetyl.CoA.fermentation.to.butanoate.II	Cluster	Cluster6	6.88622e-06	2.58433e-05	121	16	0.790556	1	Cluster1	0.957455
	808	PWY.5941..glycogen.degradation.II	Cluster	Cluster2	1.39231e-05	0.000161663	121	79	0.931568	1	Cluster1	1
	809	PWY.5941..glycogen.degradation.II	Cluster	Cluster3	7.7713e-05	0.000407178	121	79	0.84904	1	Cluster1	0.980181
	810	PWY.5989..stearate.biosynthesis.II..bacteria.and.plants.	Cluster	Cluster2	3.07588e-06	1.25081e-05	121	35	0.80636	1	Cluster1	0.965777
	811	PWY.5989..stearate.biosynthesis.II..bacteria.and.plants.	Cluster	Cluster3	1.47237e-06	3.15363e-05	121	35	0.962862	1	Cluster1	1
	812	PWY.6122..5.aminoimidazole.ribonucleotide.biosynthesis.II	Cluster	Cluster2	2.64782e-05	0.000127928	121	82	0.836541	1	Cluster1	0.976788
	813	PWY.6122..5.aminoimidazole.ribonucleotide.biosynthesis.II	Cluster	Cluster3	6.36684e-05	0.000323015	121	82	0.844179	1	Cluster1	0.979763
	814	PWY.6123..inosine.5..phosphate.biosynthesis.I	Cluster	Cluster2	2.4691e-05	0.000111262	121	82	0.824914	1	Cluster1	0.97266
	815	PWY.6123..inosine.5..phosphate.biosynthesis.I	Cluster	Cluster6	2.69341e-05	0.000233112	121	82	0.908307	1	Cluster1	1
	816	PWY.6123..inosine.5..phosphate.biosynthesis.I	Cluster	Cluster3	6.22577e-05	0.000280543	121	82	0.824856	1	Cluster1	0.97266
	817	PWY.6124..inosine.5..phosphate.biosynthesis.II	Cluster	Cluster2	2.16603e-05	0.000107382	121	81	0.84066	1	Cluster1	0.978102
	818	PWY.6124..inosine.5..phosphate.biosynthesis.II	Cluster	Cluster6	-4.79957e-07	0.00022496	121	81	0.998303	1	Cluster1	1
	819	PWY.6124..inosine.5..phosphate.biosynthesis.II	Cluster	Cluster3	1.20886e-05	0.000271839	121	81	0.964629	1	Cluster1	1
	820	PWY.6125..superpathway.of.guanosine.nucleotides.de.novo.biosynthesis.II	Cluster	Cluster6	-5.38803e-06	7.82575e-05	121	70	0.945285	1	Cluster1	1
	821	PWY.6126..superpathway.of.adenosine.nucleotides.de.novo.biosynthesis.II	Cluster	Cluster2	7.06505e-06	5.39008e-05	121	75	0.895982	1	Cluster1	1
	822	PWY.6147..6.hydroxymethyl.dihydropterin.diphosphate.biosynthesis.I	Cluster	Cluster4	-1.1003e-05	7.36924e-05	121	89	0.88177	1	Cluster1	0.994246
	823	PWY.6147..6.hydroxymethyl.dihydropterin.diphosphate.biosynthesis.I	Cluster	Cluster5	1.92093e-05	9.26868e-05	121	89	0.836299	1	Cluster1	0.976788
	824	PWY.6163..chorismate.biosynthesis.from.3.dehydroquinate	Cluster	Cluster2	4.50508e-06	9.24537e-05	121	65	0.961245	1	Cluster1	1
	825	PWY.621..sucrose.degradation.III..sucrose.invertase.	Cluster	Cluster6	3.37213e-06	4.07449e-05	121	32	0.93425	1	Cluster1	1
	826	PWY.6277..superpathway.of.5.aminoimidazole.ribonucleotide.biosynthesis	Cluster	Cluster2	2.64782e-05	0.000127928	121	82	0.836541	1	Cluster1	0.976788
	827	PWY.6277..superpathway.of.5.aminoimidazole.ribonucleotide.biosynthesis	Cluster	Cluster3	6.36684e-05	0.000323015	121	82	0.844179	1	Cluster1	0.979763
	828	PWY.6282..palmitoleate.biosynthesis.I..from..5Z..dodec.5.enoate.	Cluster	Cluster2	-2.11629e-06	7.75558e-06	121	16	0.785696	1	Cluster1	0.954448
	829	PWY.6282..palmitoleate.biosynthesis.I..from..5Z..dodec.5.enoate.	Cluster	Cluster3	-1.27801e-06	1.96349e-05	121	16	0.948254	1	Cluster1	1
	830	PWY.6305..superpathway.of.putrescine.biosynthesis	Cluster	Cluster2	-6.6678e-07	3.7426e-06	121	33	0.858873	1	Cluster1	0.983018
	831	PWY.6305..superpathway.of.putrescine.biosynthesis	Cluster	Cluster3	1.71326e-06	9.14603e-06	121	33	0.851698	1	Cluster1	0.9816
	832	PWY.6385..peptidoglycan.biosynthesis.III..mycobacteria.	Cluster	Cluster6	4.45313e-05	0.000206957	121	73	0.830218	1	Cluster1	0.975645
	833	PWY.6385..peptidoglycan.biosynthesis.III..mycobacteria.	Cluster	Cluster3	-3.16415e-05	0.000245355	121	73	0.897637	1	Cluster1	1
	834	PWY.6588..pyruvate.fermentation.to.acetone	Cluster	Cluster3	1.09638e-06	1.15119e-05	121	21	0.924132	1	Cluster1	1
	835	PWY.6606..guanosine.nucleotides.degradation.II	Cluster	Cluster4	1.49649e-06	1.30392e-05	121	14	0.909004	1	Cluster1	1
	836	PWY.6606..guanosine.nucleotides.degradation.II	Cluster	Cluster3	-2.86965e-06	4.04518e-05	121	14	0.94362	1	Cluster1	1
	837	PWY.6608..guanosine.nucleotides.degradation.III	Cluster	Cluster2	-6.8375e-06	3.6947e-05	121	52	0.853551	1	Cluster1	0.982364
	838	PWY.6609..adenine.and.adenosine.salvage.III	Cluster	Cluster6	4.95219e-05	0.000269416	121	65	0.854635	1	Cluster1	0.982364
	839	PWY.6609..adenine.and.adenosine.salvage.III	Cluster	Cluster3	2.32951e-05	0.000320438	121	65	0.942187	1	Cluster1	1
	840	PWY.6703..preQ0.biosynthesis	Cluster	Cluster3	2.03306e-05	9.95058e-05	121	56	0.838488	1	Cluster1	0.978004
	841	PWY.6823..molybdopterin.biosynthesis	Cluster	Cluster3	1.11912e-06	4.44921e-05	121	50	0.979986	1	Cluster1	1
	842	PWY.6859..all.trans.farnesol.biosynthesis	Cluster	Cluster6	1.98756e-06	2.64449e-05	121	17	0.940279	1	Cluster1	1
	843	PWY.6859..all.trans.farnesol.biosynthesis	Cluster	Cluster3	5.71492e-06	3.04647e-05	121	17	0.851535	1	Cluster1	0.9816
	844	PWY.6897..thiamine.diphosphate.salvage.II	Cluster	Cluster2	1.76602e-06	4.46424e-05	121	50	0.968524	1	Cluster1	1
	845	PWY.6897..thiamine.diphosphate.salvage.II	Cluster	Cluster3	3.00537e-05	0.00011178	121	50	0.788552	1	Cluster1	0.955852
	846	PWY.6901..superpathway.of.glucose.and.xylose.degradation	Cluster	Cluster3	4.06606e-06	4.33164e-05	121	32	0.925381	1	Cluster1	1
	847	PWY.6936..seleno.amino.acid.biosynthesis..plants.	Cluster	Cluster2	1.04599e-06	3.50576e-05	121	63	0.976264	1	Cluster1	1
	848	PWY.6936..seleno.amino.acid.biosynthesis..plants.	Cluster	Cluster3	2.23656e-05	8.81702e-05	121	63	0.80028	1	Cluster1	0.963008
	849	PWY.6969..TCA.cycle.V..2.oxoglutarate.synthase.	Cluster	Cluster2	3.73139e-06	1.63581e-05	121	31	0.820055	1	Cluster1	0.97266
	850	PWY.6969..TCA.cycle.V..2.oxoglutarate.synthase.	Cluster	Cluster3	6.97795e-06	4.10869e-05	121	31	0.865474	1	Cluster1	0.986759
	851	PWY.702..L.methionine.biosynthesis.II	Cluster	Cluster6	9.50155e-07	8.90313e-05	121	16	0.99151	1	Cluster1	1
	852	PWY.7111..pyruvate.fermentation.to.isobutanol..engineered.	Cluster	Cluster3	1.26511e-05	7.74687e-05	121	52	0.870594	1	Cluster1	0.989184
	853	PWY.7115..C4.photosynthetic.carbon.assimilation.cycle..NAD.ME.type	Cluster	Cluster2	2.22473e-07	8.87968e-06	121	42	0.980085	1	Cluster1	1
	854	PWY.7115..C4.photosynthetic.carbon.assimilation.cycle..NAD.ME.type	Cluster	Cluster3	-2.40862e-06	2.26476e-05	121	42	0.915575	1	Cluster1	1
	855	PWY.7117..C4.photosynthetic.carbon.assimilation.cycle..PEPCK.type	Cluster	Cluster2	-3.66999e-06	2.94267e-05	121	43	0.901027	1	Cluster1	1
	856	PWY.7117..C4.photosynthetic.carbon.assimilation.cycle..PEPCK.type	Cluster	Cluster3	6.45468e-06	7.40372e-05	121	43	0.930703	1	Cluster1	1
	857	PWY.7197..pyrimidine.deoxyribonucleotide.phosphorylation	Cluster	Cluster2	3.43344e-06	2.63538e-05	121	76	0.896637	1	Cluster1	1
	858	PWY.7197..pyrimidine.deoxyribonucleotide.phosphorylation	Cluster	Cluster6	-3.02071e-06	5.5254e-05	121	76	0.956535	1	Cluster1	1
	859	PWY.7199..pyrimidine.deoxyribonucleosides.salvage	Cluster	Cluster6	4.81234e-06	0.000254279	121	79	0.98495	1	Cluster1	1
	860	PWY.7208..superpathway.of.pyrimidine.nucleobases.salvage	Cluster	Cluster2	-9.12857e-06	4.73202e-05	121	80	0.847377	1	Cluster1	0.980181
	861	PWY.7208..superpathway.of.pyrimidine.nucleobases.salvage	Cluster	Cluster6	4.52932e-06	0.000104549	121	80	0.965555	1	Cluster1	1
	862	PWY.7220..adenosine.deoxyribonucleotides.de.novo.biosynthesis.II	Cluster	Cluster2	3.73724e-06	2.87908e-05	121	75	0.896988	1	Cluster1	1
	863	PWY.7220..adenosine.deoxyribonucleotides.de.novo.biosynthesis.II	Cluster	Cluster6	2.71148e-06	6.07864e-05	121	75	0.964533	1	Cluster1	1
	864	PWY.7222..guanosine.deoxyribonucleotides.de.novo.biosynthesis.II	Cluster	Cluster2	3.73724e-06	2.87908e-05	121	75	0.896988	1	Cluster1	1
	865	PWY.7222..guanosine.deoxyribonucleotides.de.novo.biosynthesis.II	Cluster	Cluster6	2.71148e-06	6.07864e-05	121	75	0.964533	1	Cluster1	1
	866	PWY.7228..superpathway.of.guanosine.nucleotides.de.novo.biosynthesis.I	Cluster	Cluster2	-9.40881e-06	4.5539e-05	121	75	0.836739	1	Cluster1	0.976788
	867	PWY.7228..superpathway.of.guanosine.nucleotides.de.novo.biosynthesis.I	Cluster	Cluster6	-1.20396e-05	9.6445e-05	121	75	0.900974	1	Cluster1	1
	868	PWY.7229..superpathway.of.adenosine.nucleotides.de.novo.biosynthesis.I	Cluster	Cluster2	1.03847e-05	7.77365e-05	121	75	0.893997	1	Cluster1	1
	869	PWY.7234..inosine.5..phosphate.biosynthesis.III	Cluster	Cluster2	2.95221e-05	0.000109519	121	78	0.788242	1	Cluster1	0.955852
	870	PWY.7234..inosine.5..phosphate.biosynthesis.III	Cluster	Cluster6	-1.40945e-05	0.000229791	121	78	0.951237	1	Cluster1	1
	871	PWY.7234..inosine.5..phosphate.biosynthesis.III	Cluster	Cluster3	1.91878e-06	0.000277864	121	78	0.994506	1	Cluster1	1
	872	PWY.7238..sucrose.biosynthesis.II	Cluster	Cluster2	3.07865e-05	0.00020102	121	79	0.878643	1	Cluster1	0.99311
	873	PWY.7282..4.amino.2.methyl.5.diphosphomethylpyrimidine.biosynthesis.II	Cluster	Cluster3	-5.1692e-06	5.54964e-05	121	33	0.925958	1	Cluster1	1
	874	PWY.7323..superpathway.of.GDP.mannose.derived.O.antigen.building.blocks.biosynthesis	Cluster	Cluster2	1.38595e-06	1.11558e-05	121	27	0.901372	1	Cluster1	1
	875	PWY.7323..superpathway.of.GDP.mannose.derived.O.antigen.building.blocks.biosynthesis	Cluster	Cluster3	6.46282e-06	2.78936e-05	121	27	0.81721	1	Cluster1	0.97191
	876	PWY.7328..superpathway.of.UDP.glucose.derived.O.antigen.building.blocks.biosynthesis	Cluster	Cluster2	1.22727e-06	1.95872e-05	121	45	0.950189	1	Cluster1	1
	877	PWY.7328..superpathway.of.UDP.glucose.derived.O.antigen.building.blocks.biosynthesis	Cluster	Cluster6	-1.82402e-06	4.10173e-05	121	45	0.964635	1	Cluster1	1
	878	PWY.7328..superpathway.of.UDP.glucose.derived.O.antigen.building.blocks.biosynthesis	Cluster	Cluster3	6.80236e-06	4.95029e-05	121	45	0.891	1	Cluster1	1
	879	PWY.7345..superpathway.of.anaerobic.sucrose.degradation	Cluster	Cluster6	-6.0492e-06	5.92835e-05	121	23	0.918966	1	Cluster1	1
	880	PWY.7356..thiamine.diphosphate.salvage.IV..yeast.	Cluster	Cluster2	-1.50421e-06	2.44446e-05	121	21	0.951088	1	Cluster1	1
	881	PWY.7356..thiamine.diphosphate.salvage.IV..yeast.	Cluster	Cluster6	-6.2799e-07	5.12294e-05	121	21	0.990248	1	Cluster1	1
	882	PWY.7356..thiamine.diphosphate.salvage.IV..yeast.	Cluster	Cluster3	2.26795e-06	6.19262e-05	121	21	0.970867	1	Cluster1	1
	883	PWY.7357..thiamine.phosphate.formation.from.pyrithiamine.and.oxythiamine..yeast.	Cluster	Cluster6	-3.60713e-05	0.000150163	121	65	0.8107	1	Cluster1	0.968499
	884	PWY.7383..anaerobic.energy.metabolism..invertebrates..cytosol.	Cluster	Cluster2	2.46227e-06	1.47862e-05	121	26	0.868124	1	Cluster1	0.988138
	885	PWY.7383..anaerobic.energy.metabolism..invertebrates..cytosol.	Cluster	Cluster6	8.39573e-07	3.09795e-05	121	26	0.978444	1	Cluster1	1
	886	PWY.7383..anaerobic.energy.metabolism..invertebrates..cytosol.	Cluster	Cluster3	3.87544e-06	3.72824e-05	121	26	0.917424	1	Cluster1	1
	887	PWY.7392..taxadiene.biosynthesis..engineered.	Cluster	Cluster6	3.37489e-06	4.45967e-05	121	15	0.939869	1	Cluster1	1
	888	PWY.7392..taxadiene.biosynthesis..engineered.	Cluster	Cluster3	9.92629e-06	5.11649e-05	121	15	0.84652	1	Cluster1	0.980181
	889	PWY.7663..gondoate.biosynthesis..anaerobic.	Cluster	Cluster3	1.28561e-05	8.71554e-05	121	57	0.883022	1	Cluster1	0.995259
	890	PWY.7664..oleate.biosynthesis.IV..anaerobic.	Cluster	Cluster2	-2.09456e-06	8.13913e-06	121	16	0.797634	1	Cluster1	0.962295
	891	PWY.7664..oleate.biosynthesis.IV..anaerobic.	Cluster	Cluster3	-1.28964e-06	2.06256e-05	121	16	0.950292	1	Cluster1	1
	892	PWY.7953..UDP.N.acetylmuramoyl.pentapeptide.biosynthesis.III..meso.diaminopimelate.containing.	Cluster	Cluster3	4.92916e-05	0.00027884	121	60	0.860024	1	Cluster1	0.983534
	893	PWY.7977..L.methionine.biosynthesis.IV	Cluster	Cluster2	3.50405e-21	9.93407e-06	121	19	1	1	Cluster1	1
	894	PWY.7977..L.methionine.biosynthesis.IV	Cluster	Cluster3	1.8109e-21	2.53465e-05	121	19	1	1	Cluster1	1
	895	PWY.8004..Entner.Doudoroff.pathway.I	Cluster	Cluster3	-2.30889e-20	1.79659e-05	121	24	1	1	Cluster1	1
	896	PWY.8073..lipid.IVA.biosynthesis..P..putida.	Cluster	Cluster3	9.16689e-06	7.99047e-05	121	43	0.908874	1	Cluster1	1
	897	PWY.8187..L.arginine.degradation.XIII..reductive.Stickland.reaction.	Cluster	Cluster6	-9.83838e-06	0.000122	121	69	0.935935	1	Cluster1	1
	898	PWY.8187..L.arginine.degradation.XIII..reductive.Stickland.reaction.	Cluster	Cluster3	2.68448e-05	0.000145774	121	69	0.854265	1	Cluster1	0.982364
	899	PWY.841..superpathway.of.purine.nucleotides.de.novo.biosynthesis.I	Cluster	Cluster2	-1.07567e-05	4.49315e-05	121	57	0.811233	1	Cluster1	0.968724
	900	PWY.I9..L.cysteine.biosynthesis.VI..from.L.methionine.	Cluster	Cluster6	-1.56952e-05	9.68845e-05	121	17	0.871708	1	Cluster1	0.98925
	901	PWY0.1061..superpathway.of.L.alanine.biosynthesis	Cluster	Cluster2	1.06277e-05	7.75588e-05	121	67	0.891287	1	Cluster1	1
	902	PWY0.1061..superpathway.of.L.alanine.biosynthesis	Cluster	Cluster3	4.2984e-05	0.000194203	121	67	0.825256	1	Cluster1	0.97266
	903	PWY0.1297..superpathway.of.purine.deoxyribonucleosides.degradation	Cluster	Cluster2	-4.73334e-06	1.79627e-05	121	40	0.792701	1	Cluster1	0.959226
	904	PWY0.1297..superpathway.of.purine.deoxyribonucleosides.degradation	Cluster	Cluster3	5.36563e-06	4.49593e-05	121	40	0.905227	1	Cluster1	1
	905	PWY0.1298..superpathway.of.pyrimidine.deoxyribonucleosides.degradation	Cluster	Cluster2	-1.89002e-06	1.48831e-05	121	45	0.899211	1	Cluster1	1
	906	PWY0.1298..superpathway.of.pyrimidine.deoxyribonucleosides.degradation	Cluster	Cluster3	6.33284e-06	3.73396e-05	121	45	0.865652	1	Cluster1	0.986759
	907	PWY0.1586..peptidoglycan.maturation..meso.diaminopimelate.containing.	Cluster	Cluster3	1.20062e-05	0.000117297	121	69	0.918658	1	Cluster1	1
	908	PWY0.301..L.ascorbate.degradation.I..bacterial..anaerobic.	Cluster	Cluster2	-1.01499e-06	2.01375e-05	121	28	0.959904	1	Cluster1	1
	909	PWY0.301..L.ascorbate.degradation.I..bacterial..anaerobic.	Cluster	Cluster3	6.16572e-06	5.04246e-05	121	28	0.902913	1	Cluster1	1
	910	PWY0.845..superpathway.of.pyridoxal.5..phosphate.biosynthesis.and.salvage	Cluster	Cluster2	-3.09203e-07	1.16655e-05	121	25	0.978903	1	Cluster1	1
	911	PWY0.845..superpathway.of.pyridoxal.5..phosphate.biosynthesis.and.salvage	Cluster	Cluster3	6.34645e-06	2.90324e-05	121	25	0.82736	1	Cluster1	0.974321
	912	PWY0.862...5Z..dodecenoate.biosynthesis.I	Cluster	Cluster2	-1.62002e-06	7.86811e-06	121	19	0.837291	1	Cluster1	0.977014
	913	PWY0.862...5Z..dodecenoate.biosynthesis.I	Cluster	Cluster3	2.80851e-07	1.9597e-05	121	19	0.988592	1	Cluster1	1
	914	PWY4FS.7..phosphatidylglycerol.biosynthesis.I..plastidic.	Cluster	Cluster3	2.58875e-06	9.06066e-05	121	52	0.977262	1	Cluster1	1
	915	PWY4FS.8..phosphatidylglycerol.biosynthesis.II..non.plastidic.	Cluster	Cluster3	2.58897e-06	9.06067e-05	121	52	0.97726	1	Cluster1	1
	916	PWY4LZ.257..superpathway.of.fermentation..Chlamydomonas.reinhardtii.	Cluster	Cluster2	-2.78642e-07	8.547e-06	121	16	0.974079	1	Cluster1	1
	917	PWY4LZ.257..superpathway.of.fermentation..Chlamydomonas.reinhardtii.	Cluster	Cluster3	-1.62563e-06	2.17671e-05	121	16	0.940643	1	Cluster1	1
	918	PWY66.389..phytol.degradation	Cluster	Cluster6	-2.86904e-07	1.28152e-05	121	39	0.982187	1	Cluster1	1
	919	PWY66.389..phytol.degradation	Cluster	Cluster3	-5.91717e-07	1.54786e-05	121	39	0.969595	1	Cluster1	1
	920	PWY66.399..gluconeogenesis.III	Cluster	Cluster2	2.29614e-06	9.69755e-06	121	17	0.813315	1	Cluster1	0.969152
	921	PWY66.399..gluconeogenesis.III	Cluster	Cluster6	-1.45064e-06	2.05382e-05	121	17	0.943867	1	Cluster1	1
	922	PWY66.399..gluconeogenesis.III	Cluster	Cluster3	3.32929e-06	2.42655e-05	121	17	0.891128	1	Cluster1	1
	923	PWY66.409..superpathway.of.purine.nucleotide.salvage	Cluster	Cluster2	4.07086e-06	2.66962e-05	121	33	0.879073	1	Cluster1	0.993197
	924	PYRIDNUCSYN.PWY..NAD.de.novo.biosynthesis.I..from.aspartate.	Cluster	Cluster3	2.11403e-05	0.000130037	121	57	0.871167	1	Cluster1	0.989242
	925	PYRIDOXSYN.PWY..pyridoxal.5..phosphate.biosynthesis.I	Cluster	Cluster2	-8.47028e-07	9.61265e-06	121	26	0.929946	1	Cluster1	1
	926	PYRIDOXSYN.PWY..pyridoxal.5..phosphate.biosynthesis.I	Cluster	Cluster3	4.22171e-06	2.3871e-05	121	26	0.859938	1	Cluster1	0.983534
	927	SER.GLYSYN.PWY..superpathway.of.L.serine.and.glycine.biosynthesis.I	Cluster	Cluster2	5.98505e-06	3.06217e-05	121	57	0.845387	1	Cluster1	0.980181
	928	THISYNARA.PWY..superpathway.of.thiamine.diphosphate.biosynthesis.III..eukaryotes.	Cluster	Cluster3	-1.22416e-05	0.000100736	121	57	0.903514	1	Cluster1	1
	929	UDPNAGSYN.PWY..UDP.N.acetyl.D.glucosamine.biosynthesis.I	Cluster	Cluster4	1.0545e-05	0.000106404	121	118	0.921292	1	Cluster1	1
	930	VALSYN.PWY..L.valine.biosynthesis	Cluster	Cluster3	2.05345e-05	9.23761e-05	121	57	0.824514	1	Cluster1	0.97266
	931	PWY.922..mevalonate.pathway.I..eukaryotes.and.bacteria.	Cluster	Cluster2	0.0017779	8.23874e-05	92	50	1.09281e-36	8.21793e-34	Cluster5	6.14377e-34
	932	PWY.5667..CDP.diacylglycerol.biosynthesis.I	Cluster	Cluster2	0.00153767	8.4314e-05	92	77	1.802e-31	3.38776e-29	Cluster5	4.60493e-29
	933	PWY.7197..pyrimidine.deoxyribonucleotide.phosphorylation	Cluster	Cluster3	0.00137798	7.20225e-05	92	64	1.3011e-31	3.38776e-29	Cluster5	4.06377e-29
	934	PWY0.1319..CDP.diacylglycerol.biosynthesis.II	Cluster	Cluster2	0.00153636	8.41237e-05	92	78	1.6346e-31	3.38776e-29	Cluster5	4.59487e-29
	935	LACTOSECAT.PWY..lactose.and.galactose.degradation.I	Cluster	Cluster2	0.00222381	0.000112402	92	61	6.07955e-30	9.14365e-28	Cluster5	1.0681e-27
	936	PWY.5384..sucrose.degradation.IV..sucrose.phosphorylase.	Cluster	Cluster3	0.00195606	0.00012847	92	44	2.90316e-26	3.63863e-24	Cluster5	3.70945e-24
	937	P161.PWY..acetylene.degradation..anaerobic.	Cluster	Cluster3	0.00135397	7.96007e-05	92	46	3.92794e-26	4.21973e-24	Cluster5	4.80063e-24
	938	PWY0.1477..ethanolamine.utilization	Cluster	Cluster3	0.00134921	8.11876e-05	92	49	4.61364e-25	4.33682e-23	Cluster5	5.40373e-23
	939	PWY.6147..6.hydroxymethyl.dihydropterin.diphosphate.biosynthesis.I	Cluster	Cluster2	0.00152184	9.75042e-05	92	75	2.15281e-24	1.79879e-22	Cluster5	2.24131e-22
	940	P41.PWY..pyruvate.fermentation.to.acetate.and..S..lactate.I	Cluster	Cluster2	0.00182283	0.000134145	92	87	1.96911e-22	1.34615e-20	Cluster5	1.62799e-20
	941	PWY.5100..pyruvate.fermentation.to.acetate.and.lactate.II	Cluster	Cluster2	0.00182203	0.000134185	92	88	1.96838e-22	1.34615e-20	Cluster5	1.62799e-20
	942	PWY.6317..D.galactose.degradation.I..Leloir.pathway.	Cluster	Cluster3	0.00155741	0.00014169	92	73	3.93719e-18	2.46731e-16	Cluster5	1.87584e-16
	943	PWY.7208..superpathway.of.pyrimidine.nucleobases.salvage	Cluster	Cluster3	0.00130948	0.00012685	92	68	1.00147e-16	5.79313e-15	Cluster5	4.13991e-15
	944	UDPNAGSYN.PWY..UDP.N.acetyl.D.glucosamine.biosynthesis.I	Cluster	Cluster2	0.00140948	0.000146485	92	89	2.61774e-15	1.4061e-13	Cluster5	8.26795e-14
	945	DTDPRHAMSYN.PWY..dTDP..beta..L.rhamnose.biosynthesis	Cluster	Cluster2	-0.000692096	7.3836e-05	92	65	1.61502e-14	8.09665e-13	Cluster5	4.58569e-13
	946	PWY.7790..UMP.biosynthesis.II	Cluster	Cluster2	0.00137414	0.000153747	92	87	6.03148e-14	2.83479e-12	Cluster5	1.61471e-12
	947	PWY.7791..UMP.biosynthesis.III	Cluster	Cluster2	0.00137254	0.000153871	92	87	6.54981e-14	2.89733e-12	Cluster5	1.7207e-12
	948	OANTIGEN.PWY..O.antigen.building.blocks.biosynthesis..E..coli.	Cluster	Cluster2	-0.000754216	8.55643e-05	92	64	2.06458e-13	8.62534e-12	Cluster5	4.7963e-12
	949	PWY.8187..L.arginine.degradation.XIII..reductive.Stickland.reaction.	Cluster	Cluster2	-0.000558649	6.54285e-05	92	63	8.35287e-13	3.30598e-11	Cluster5	1.80615e-11
	950	NONMEVIPP.PWY..methylerythritol.phosphate.pathway.I	Cluster	Cluster2	-0.00067687	8.05373e-05	92	57	9.41115e-13	3.53859e-11	Cluster5	2.00415e-11
	951	PWY.6163..chorismate.biosynthesis.from.3.dehydroquinate	Cluster	Cluster2	-0.000927948	0.000114018	92	61	3.01544e-12	1.07981e-10	Cluster5	5.84579e-11
	952	PWY.5686..UMP.biosynthesis.I	Cluster	Cluster2	0.00140059	0.000174501	92	87	1.11509e-11	3.81157e-10	Cluster5	2.1037e-10
	953	PANTO.PWY..phosphopantothenate.biosynthesis.I	Cluster	Cluster2	-0.000799937	9.92528e-05	92	59	1.81427e-11	5.93187e-10	Cluster5	3.33327e-10
	954	PWY.6385..peptidoglycan.biosynthesis.III..mycobacteria.	Cluster	Cluster2	-0.00084358	0.000113093	92	67	7.58772e-11	2.37749e-09	Cluster5	1.30853e-09
	955	ARO.PWY..chorismate.biosynthesis.I	Cluster	Cluster2	-0.000850316	0.000115998	92	61	1.38639e-10	4.17026e-09	Cluster5	2.33361e-09
	956	PWY.6123..inosine.5..phosphate.biosynthesis.I	Cluster	Cluster2	-0.00100525	0.000137228	92	72	1.56826e-10	4.53588e-09	Cluster5	2.62403e-09
	957	GLYCOGENSYNTH.PWY..glycogen.biosynthesis.I..from.ADP.D.Glucose.	Cluster	Cluster2	-0.000881188	0.000122259	92	64	3.58262e-10	9.97827e-09	Cluster5	5.68969e-09
	958	PWY.6122..5.aminoimidazole.ribonucleotide.biosynthesis.II	Cluster	Cluster2	-0.00111319	0.000159562	92	73	7.21363e-10	1.87057e-08	Cluster5	1.12653e-08
	959	PWY.6277..superpathway.of.5.aminoimidazole.ribonucleotide.biosynthesis	Cluster	Cluster2	-0.00111319	0.000159562	92	73	7.21363e-10	1.87057e-08	Cluster5	1.12653e-08
	960	PWY.7238..sucrose.biosynthesis.II	Cluster	Cluster2	-0.00172821	0.000249136	92	71	8.40072e-10	2.10578e-08	Cluster5	1.2975e-08
	961	PWY.5265..peptidoglycan.biosynthesis.II..staphylococci.	Cluster	Cluster4	0.000432204	6.28856e-05	92	56	9.93686e-10	2.41049e-08	Cluster5	1.52637e-08
	962	TRNA.CHARGING.PWY..tRNA.charging	Cluster	Cluster2	0.00131333	0.000192371	92	86	1.11219e-09	2.61364e-08	Cluster5	1.69911e-08
	963	PWY.6121..5.aminoimidazole.ribonucleotide.biosynthesis.I	Cluster	Cluster2	-0.00100982	0.000150478	92	71	2.0926e-09	4.7686e-08	Cluster5	3.07974e-08
	964	PWY.6270..isoprene.biosynthesis.I	Cluster	Cluster2	-0.000434848	6.59222e-05	92	53	3.34293e-09	7.39378e-08	Cluster5	4.81897e-08
	965	PWY.7560..methylerythritol.phosphate.pathway.II	Cluster	Cluster2	-0.000418358	6.38248e-05	92	53	4.04677e-09	8.69477e-08	Cluster5	5.68773e-08
	966	PWY.6124..inosine.5..phosphate.biosynthesis.II	Cluster	Cluster2	-0.000883514	0.000133247	92	71	4.66786e-09	9.75064e-08	Cluster5	6.49572e-08
	967	PWY.7234..inosine.5..phosphate.biosynthesis.III	Cluster	Cluster2	-0.000900349	0.000137606	92	69	7.4345e-09	1.51101e-07	Cluster5	1.00958e-07
	968	PWY.6700..queuosine.biosynthesis.I..de.novo.	Cluster	Cluster2	-0.000496821	7.92289e-05	92	56	1.38379e-08	2.73846e-07	Cluster5	1.80085e-07
	969	PWY.5941..glycogen.degradation.II	Cluster	Cluster2	-0.00122083	0.000198301	92	71	2.66122e-08	5.13137e-07	Cluster5	3.29545e-07
	970	PWY.6151..S.adenosyl.L.methionine.salvage.I	Cluster	Cluster2	-0.000819187	0.000132148	92	78	2.89763e-08	5.44754e-07	Cluster5	3.55687e-07
	971	ASPASN.PWY..superpathway.of.L.aspartate.and.L.asparagine.biosynthesis	Cluster	Cluster2	-0.000244471	4.04201e-05	92	61	3.83319e-08	7.03064e-07	Cluster5	4.60475e-07
	972	PWY.5695..inosine.5..phosphate.degradation	Cluster	Cluster2	-0.000563661	9.66822e-05	92	60	9.31925e-08	1.66859e-06	Cluster5	1.06489e-06
	973	COA.PWY.1..superpathway.of.coenzyme.A.biosynthesis.III..mammals.	Cluster	Cluster2	-0.00063352	0.000110269	92	79	1.32711e-07	2.3209e-06	Cluster5	1.4982e-06
	974	PWY.2942..L.lysine.biosynthesis.III	Cluster	Cluster2	-0.000401416	7.00178e-05	92	63	1.43583e-07	2.45397e-06	Cluster5	1.60164e-06
	975	COMPLETE.ARO.PWY..superpathway.of.aromatic.amino.acid.biosynthesis	Cluster	Cluster2	-0.000445548	7.83628e-05	92	55	1.71338e-07	2.86325e-06	Cluster5	1.88138e-06
	976	PWY.7221..guanosine.ribonucleotides.de.novo.biosynthesis	Cluster	Cluster2	-0.00108965	0.000191948	92	83	1.84319e-07	2.9491e-06	Cluster5	1.98514e-06
	977	PYRIDNUCSYN.PWY..NAD.de.novo.biosynthesis.I..from.aspartate.	Cluster	Cluster2	-0.00035273	6.21745e-05	92	53	1.84182e-07	2.9491e-06	Cluster5	1.98514e-06
	978	PWY.7953..UDP.N.acetylmuramoyl.pentapeptide.biosynthesis.III..meso.diaminopimelate.containing.	Cluster	Cluster2	-0.000750755	0.000133626	92	56	2.29683e-07	3.59837e-06	Cluster5	2.41813e-06
	979	PANTOSYN.PWY..superpathway.of.coenzyme.A.biosynthesis.I..bacteria.	Cluster	Cluster2	-0.000406429	7.35723e-05	92	55	3.39962e-07	5.21737e-06	Cluster5	3.51336e-06
	980	GLYCOLYSIS..glycolysis.I..from.glucose.6.phosphate.	Cluster	Cluster3	0.0013576	0.000246978	92	64	4.63693e-07	6.97394e-06	Cluster5	4.67934e-06
	981	PWY.5659..GDP.mannose.biosynthesis	Cluster	Cluster2	-0.000181687	3.35785e-05	92	47	5.84344e-07	8.61621e-06	Cluster5	5.78377e-06
	982	PWY.6936..seleno.amino.acid.biosynthesis..plants.	Cluster	Cluster2	-0.000233936	4.34723e-05	92	60	6.56777e-07	9.49801e-06	Cluster5	6.4779e-06
	983	POLYAMSYN.PWY..superpathway.of.polyamine.biosynthesis.I	Cluster	Cluster6	4.76791e-05	9.64151e-06	92	12	8.62931e-07	1.22439e-05	Cluster5	8.36448e-06
	984	P461.PWY..hexitol.fermentation.to.lactate..formate..ethanol.and.acetate	Cluster	Cluster6	6.89348e-05	1.30685e-05	92	14	9.59814e-07	1.33663e-05	Cluster5	9.11499e-06
	985	PWY.6386..UDP.N.acetylmuramoyl.pentapeptide.biosynthesis.II..lysine.containing.	Cluster	Cluster2	0.000724953	0.00013803	92	88	1.0692e-06	1.46188e-05	Cluster5	1.00377e-05
	986	PWY.7851..coenzyme.A.biosynthesis.II..eukaryotic.	Cluster	Cluster2	0.000497377	9.50924e-05	92	88	1.43793e-06	1.93094e-05	Cluster5	1.32526e-05
	987	COA.PWY..coenzyme.A.biosynthesis.I..prokaryotic.	Cluster	Cluster2	0.000494335	9.51981e-05	92	88	1.67106e-06	2.20463e-05	Cluster5	1.51528e-05
	988	THISYNARA.PWY..superpathway.of.thiamine.diphosphate.biosynthesis.III..eukaryotes.	Cluster	Cluster2	-0.000209202	4.08866e-05	92	52	1.83652e-06	2.38115e-05	Cluster5	1.65464e-05
	989	CALVIN.PWY..Calvin.Benson.Bassham.cycle	Cluster	Cluster2	-0.000388222	7.64978e-05	92	50	2.25411e-06	2.87304e-05	Cluster5	1.99883e-05
	990	PWY.5097..L.lysine.biosynthesis.VI	Cluster	Cluster2	-0.000270876	5.35939e-05	92	60	2.42961e-06	3.04511e-05	Cluster5	2.14768e-05
	991	PWY.841..superpathway.of.purine.nucleotides.de.novo.biosynthesis.I	Cluster	Cluster2	-0.000264633	5.24412e-05	92	54	2.49635e-06	3.07747e-05	Cluster5	2.19976e-05
	992	PWY.7663..gondoate.biosynthesis..anaerobic.	Cluster	Cluster2	-0.000209478	4.21712e-05	92	55	3.49084e-06	4.23405e-05	Cluster5	2.97356e-05
	993	PEPTIDOGLYCANSYN.PWY..peptidoglycan.biosynthesis.I..meso.diaminopimelate.containing.	Cluster	Cluster2	0.000676152	0.000137195	92	88	3.94913e-06	4.71388e-05	Cluster5	3.30387e-05
	994	PWY.6387..UDP.N.acetylmuramoyl.pentapeptide.biosynthesis.I..meso.diaminopimelate.containing.	Cluster	Cluster2	0.00068512	0.00014092	92	89	5.14259e-06	6.04254e-05	Cluster5	4.15397e-05
	995	PWY.7328..superpathway.of.UDP.glucose.derived.O.antigen.building.blocks.biosynthesis	Cluster	Cluster2	-0.000118407	2.44529e-05	92	44	6.2871e-06	7.27369e-05	Cluster5	4.95043e-05
	996	HSERMETANA.PWY..L.methionine.biosynthesis.III	Cluster	Cluster2	-0.000232505	4.88155e-05	92	57	7.76441e-06	8.58653e-05	Cluster5	5.99609e-05
	997	PHOSLIPSYN.PWY..superpathway.of.phospholipid.biosynthesis.I..bacteria.	Cluster	Cluster2	-0.000116752	2.45323e-05	92	41	7.76162e-06	8.58653e-05	Cluster5	5.99609e-05
	998	PWY.6703..preQ0.biosynthesis	Cluster	Cluster2	-0.000229279	4.81372e-05	92	54	7.59339e-06	8.58653e-05	Cluster5	5.91274e-05
	999	VALSYN.PWY..L.valine.biosynthesis	Cluster	Cluster2	-0.000212357	4.47705e-05	92	53	8.2265e-06	8.96569e-05	Cluster5	6.28388e-05
	1000	PWY0.1586..peptidoglycan.maturation..meso.diaminopimelate.containing.	Cluster	Cluster2	-0.000262515	5.55091e-05	92	64	8.64527e-06	9.28749e-05	Cluster5	6.55037e-05
	1001	ANAGLYCOLYSIS.PWY..glycolysis.III..from.glucose.	Cluster	Cluster2	-0.000549011	0.000116504	92	55	9.25513e-06	9.53405e-05	Cluster5	6.93765e-05
	1002	COA.PWY..coenzyme.A.biosynthesis.I..prokaryotic.	Cluster	Cluster6	-0.00089163	0.000185515	92	88	9.1638e-06	9.53405e-05	Cluster5	6.88755e-05
	1003	PWY0.1296..purine.ribonucleosides.degradation	Cluster	Cluster2	-0.000155552	3.29738e-05	92	52	9.03998e-06	9.53405e-05	Cluster5	6.8127e-05
	1004	PWY.7851..coenzyme.A.biosynthesis.II..eukaryotic.	Cluster	Cluster6	-0.000888503	0.000185309	92	88	9.56274e-06	9.71782e-05	Cluster5	7.13021e-05
	1005	DTDPRHAMSYN.PWY..dTDP..beta..L.rhamnose.biosynthesis	Cluster	Cluster6	-0.000680576	0.000144409	92	65	1.24433e-05	0.000124765	Cluster5	9.10891e-05
	1006	ILEUSYN.PWY..L.isoleucine.biosynthesis.I..from.threonine.	Cluster	Cluster2	-0.000192859	4.16192e-05	92	49	1.2666e-05	0.000125326	Cluster5	9.22384e-05
	1007	PWY.5103..L.isoleucine.biosynthesis.III	Cluster	Cluster2	-0.000175234	3.79509e-05	92	49	1.34983e-05	0.000131828	Cluster5	9.75002e-05
	1008	PWY.1042..glycolysis.IV	Cluster	Cluster3	0.00106544	0.00023449	92	73	1.7885e-05	0.000172429	Cluster5	0.000126318
	1009	OANTIGEN.PWY..O.antigen.building.blocks.biosynthesis..E..coli.	Cluster	Cluster6	-0.000770875	0.000167607	92	64	1.98326e-05	0.000188786	Cluster5	0.000137883
	1010	DTDPRHAMSYN.PWY..dTDP..beta..L.rhamnose.biosynthesis	Cluster	Cluster4	-0.000278836	6.24379e-05	92	65	2.38914e-05	0.000224579	Cluster5	0.000163801
	1011	RIBOSYN2.PWY..flavin.biosynthesis.I..bacteria.and.plants.	Cluster	Cluster2	-0.000205423	4.6051e-05	92	54	2.43556e-05	0.000226116	Cluster5	0.000166578
	1012	PWY.7111..pyruvate.fermentation.to.isobutanol..engineered.	Cluster	Cluster2	-0.0001663	3.75779e-05	92	49	2.81639e-05	0.000258284	Cluster5	0.00019031
	1013	DTDPRHAMSYN.PWY..dTDP..beta..L.rhamnose.biosynthesis	Cluster	Cluster3	-0.000755538	0.000171693	92	65	3.34368e-05	0.000301744	Cluster5	0.000222201
	1014	NONOXIPENT.PWY..pentose.phosphate.pathway..non.oxidative.branch..I	Cluster	Cluster2	-0.000308335	7.0516e-05	92	57	3.44668e-05	0.000301744	Cluster5	0.000226112
	1015	PWY.6305..superpathway.of.putrescine.biosynthesis	Cluster	Cluster6	4.17433e-05	1.00038e-05	92	31	3.41455e-05	0.000301744	Cluster5	0.000225842
	1016	PWY.6823..molybdopterin.biosynthesis	Cluster	Cluster2	-9.5337e-05	2.17364e-05	92	47	3.4508e-05	0.000301744	Cluster5	0.000226112
	1017	PWY.724..superpathway.of.L.lysine..L.threonine.and.L.methionine.biosynthesis.II	Cluster	Cluster2	-0.000217289	4.97139e-05	92	58	3.62909e-05	0.000313687	Cluster5	0.000236143
	1018	PWY.8187..L.arginine.degradation.XIII..reductive.Stickland.reaction.	Cluster	Cluster4	-0.000239274	5.53429e-05	92	63	4.08422e-05	0.000349015	Cluster5	0.000264533
	1019	PWY.8178..pentose.phosphate.pathway..non.oxidative.branch..II	Cluster	Cluster2	-0.000256379	6.03137e-05	92	54	5.40585e-05	0.000456764	Cluster5	0.00034148
	1020	PWY.6151..S.adenosyl.L.methionine.salvage.I	Cluster	Cluster6	-0.00110974	0.000257338	92	78	5.6322e-05	0.000470602	Cluster5	0.000354186
	1021	COLANSYN.PWY..colanic.acid.building.blocks.biosynthesis	Cluster	Cluster2	-0.00012009	2.84935e-05	92	41	6.13688e-05	0.000507136	Cluster5	0.000382501
	1022	PWY.8187..L.arginine.degradation.XIII..reductive.Stickland.reaction.	Cluster	Cluster6	-0.00054659	0.000127935	92	63	6.48961e-05	0.000530455	Cluster5	0.000403591
	1023	PWY.6608..guanosine.nucleotides.degradation.III	Cluster	Cluster2	-0.000188187	4.50415e-05	92	50	6.97193e-05	0.000563752	Cluster5	0.000432629
	1024	OANTIGEN.PWY..O.antigen.building.blocks.biosynthesis..E..coli.	Cluster	Cluster3	-0.000834133	0.000198995	92	64	7.18401e-05	0.00057472	Cluster5	0.000444807
	1025	PWY0.862...5Z..dodecenoate.biosynthesis.I	Cluster	Cluster6	8.09983e-05	1.93105e-05	92	17	9.51786e-05	0.000753414	Cluster5	0.000569249
	1026	PWY.1042..glycolysis.IV	Cluster	Cluster2	-0.000411189	0.000100721	92	73	9.921e-05	0.000770147	Cluster5	0.000589128
	1027	PWY.1269..CMP.3.deoxy.D.manno.octulosonate.biosynthesis	Cluster	Cluster2	-7.76271e-05	1.89993e-05	92	45	9.93407e-05	0.000770147	Cluster5	0.000589128
	1028	OANTIGEN.PWY..O.antigen.building.blocks.biosynthesis..E..coli.	Cluster	Cluster4	-0.000292737	7.22406e-05	92	64	0.00011008	0.000844696	Cluster5	0.000646002
	1029	PWY.5484..glycolysis.II..from.fructose.6.phosphate.	Cluster	Cluster2	-0.000282973	7.02651e-05	92	52	0.0001206	0.000916073	Cluster5	0.000700427
	1030	PWY.6386..UDP.N.acetylmuramoyl.pentapeptide.biosynthesis.II..lysine.containing.	Cluster	Cluster6	-0.00115087	0.000279477	92	88	0.000122485	0.000921087	Cluster5	0.000709908
	1031	PWY.241..C4.photosynthetic.carbon.assimilation.cycle..NADP.ME.type	Cluster	Cluster2	-0.000145531	3.66668e-05	92	48	0.000148659	0.00110685	Cluster5	0.00085108
	1032	PWY0.162..superpathway.of.pyrimidine.ribonucleotides.de.novo.biosynthesis	Cluster	Cluster2	-0.000294744	7.46722e-05	92	59	0.000160746	0.00118511	Cluster5	0.000914689
	1033	PENTOSE.P.PWY..pentose.phosphate.pathway	Cluster	Cluster2	-0.000264811	6.7177e-05	92	55	0.000166571	0.00121613	Cluster5	0.000944017
	1034	PANTO.PWY..phosphopantothenate.biosynthesis.I	Cluster	Cluster6	-0.000766361	0.000192693	92	59	0.000170842	0.00123532	Cluster5	0.000958557
	1035	PEPTIDOGLYCANSYN.PWY..peptidoglycan.biosynthesis.I..meso.diaminopimelate.containing.	Cluster	Cluster6	-0.00110803	0.000279141	92	88	0.000201333	0.00144193	Cluster5	0.00111847
	1036	ANAEROFRUCAT.PWY..homolactic.fermentation	Cluster	Cluster2	-0.00023743	6.12418e-05	92	50	0.000210191	0.00149116	Cluster5	0.00116538
	1037	NONMEVIPP.PWY..methylerythritol.phosphate.pathway.I	Cluster	Cluster6	-0.000625644	0.000159918	92	57	0.000225255	0.0015831	Cluster5	0.00124155
	1038	PWY.5189..tetrapyrrole.biosynthesis.II..from.glycine.	Cluster	Cluster2	-8.10006e-05	2.11021e-05	92	45	0.000242402	0.00168784	Cluster5	0.00131797
	1039	PWY.6897..thiamine.diphosphate.salvage.II	Cluster	Cluster2	-0.000209596	5.48137e-05	92	49	0.000247667	0.00170592	Cluster5	0.001344
	1040	PWY.7198..pyrimidine.deoxyribonucleotides.de.novo.biosynthesis.IV	Cluster	Cluster2	-0.000138262	3.61471e-05	92	57	0.000249537	0.00170592	Cluster5	0.00135154
	1041	BRANCHED.CHAIN.AA.SYN.PWY..superpathway.of.branched.chain.amino.acid.biosynthesis	Cluster	Cluster2	-0.000151768	3.96886e-05	92	44	0.000257122	0.00174194	Cluster5	0.00138994
	1042	SER.GLYSYN.PWY..superpathway.of.L.serine.and.glycine.biosynthesis.I	Cluster	Cluster2	-0.000130136	3.40877e-05	92	55	0.0002641	0.00177324	Cluster5	0.00142088
	1043	PWY.6630..superpathway.of.L.tyrosine.biosynthesis	Cluster	Cluster2	-0.000169415	4.45663e-05	92	47	0.000268285	0.0017854	Cluster5	0.00143922
	1044	PWY.4041...gamma..glutamyl.cycle	Cluster	Cluster2	-9.7095e-05	2.56052e-05	92	46	0.000305754	0.0020169	Cluster5	0.00162165
	1045	PWY.6151..S.adenosyl.L.methionine.salvage.I	Cluster	Cluster3	-0.00114606	0.000307102	92	78	0.000374859	0.00245125	Cluster5	0.00196225
	1046	NONMEVIPP.PWY..methylerythritol.phosphate.pathway.I	Cluster	Cluster4	-0.000248794	6.73106e-05	92	57	0.000382699	0.00246134	Cluster5	0.00199346
	1047	PWY.5188..tetrapyrrole.biosynthesis.I..from.glutamate.	Cluster	Cluster2	-9.65921e-05	2.60776e-05	92	47	0.000382948	0.00246134	Cluster5	0.00199346
	1048	PWY.7199..pyrimidine.deoxyribonucleosides.salvage	Cluster	Cluster3	0.00120309	0.000328259	92	66	0.000424946	0.00270813	Cluster5	0.00220392
	1049	PWY.6125..superpathway.of.guanosine.nucleotides.de.novo.biosynthesis.II	Cluster	Cluster2	-0.000153529	4.19369e-05	92	58	0.000435694	0.0027533	Cluster5	0.0022555
	1050	PWY.6387..UDP.N.acetylmuramoyl.pentapeptide.biosynthesis.I..meso.diaminopimelate.containing.	Cluster	Cluster6	-0.00106763	0.000287005	92	89	0.000447859	0.00280659	Cluster5	0.00230997
	1051	PWY.6163..chorismate.biosynthesis.from.3.dehydroquinate	Cluster	Cluster6	-0.000843133	0.000227893	92	61	0.000466986	0.00290226	Cluster5	0.00238672
	1052	PWY.6123..inosine.5..phosphate.biosynthesis.I	Cluster	Cluster6	-0.00100142	0.000270891	92	72	0.000481164	0.00296586	Cluster5	0.00245472
	1053	PWY.5686..UMP.biosynthesis.I	Cluster	Cluster6	-0.00123246	0.000339633	92	87	0.000556369	0.00340154	Cluster5	0.00281287
	1054	PWY.6628..superpathway.of.L.phenylalanine.biosynthesis	Cluster	Cluster2	-0.000181125	5.06076e-05	92	46	0.000567164	0.00343957	Cluster5	0.00286229
	1055	COA.PWY.1..superpathway.of.coenzyme.A.biosynthesis.III..mammals.	Cluster	Cluster6	-0.00081725	0.000226948	92	79	0.000643389	0.00380967	Cluster5	0.00319535
	1056	NAGLIPASYN.PWY..lipid.IVA.biosynthesis..E..coli.	Cluster	Cluster2	-0.000136679	3.85848e-05	92	42	0.000641296	0.00380967	Cluster5	0.00319059
	1057	PWY.8073..lipid.IVA.biosynthesis..P..putida.	Cluster	Cluster2	-0.000136679	3.85848e-05	92	42	0.000641296	0.00380967	Cluster5	0.00319059
	1058	PWY.3841..folate.transformations.II..plants.	Cluster	Cluster3	0.000882475	0.000248594	92	78	0.000687176	0.00400586	Cluster5	0.00337701
	1059	PWY0.1298..superpathway.of.pyrimidine.deoxyribonucleosides.degradation	Cluster	Cluster2	-6.42732e-05	1.82336e-05	92	43	0.000683211	0.00400586	Cluster5	0.00336931
	1060	PANTO.PWY..phosphopantothenate.biosynthesis.I	Cluster	Cluster3	-0.000817188	0.000230317	92	59	0.000726232	0.00420097	Cluster5	0.00355033
	1061	PWY.8187..L.arginine.degradation.XIII..reductive.Stickland.reaction.	Cluster	Cluster3	-0.000535255	0.000152138	92	63	0.000733135	0.00420853	Cluster5	0.00357219
	1062	PWY.7234..inosine.5..phosphate.biosynthesis.III	Cluster	Cluster6	-0.000942544	0.000267988	92	69	0.000824649	0.004698	Cluster5	0.00394152
	1063	PWY66.389..phytol.degradation	Cluster	Cluster2	-2.64387e-05	7.63697e-06	92	38	0.000833735	0.00471405	Cluster5	0.00396553
	1064	PWY.7357..thiamine.phosphate.formation.from.pyrithiamine.and.oxythiamine..yeast.	Cluster	Cluster2	-0.000299367	8.66187e-05	92	56	0.000849636	0.00476811	Cluster5	0.00401399
	1065	PWY.6124..inosine.5..phosphate.biosynthesis.II	Cluster	Cluster6	-0.000908977	0.000259856	92	71	0.000873631	0.00486645	Cluster5	0.00412043
	1066	PWY.7791..UMP.biosynthesis.III	Cluster	Cluster6	-0.0011023	0.000318236	92	87	0.000993252	0.0054921	Cluster5	0.00464564
	1067	PWY.7790..UMP.biosynthesis.II	Cluster	Cluster6	-0.00110085	0.000318335	92	87	0.00101079	0.00554826	Cluster5	0.0047198
	1068	PWY.4041...gamma..glutamyl.cycle	Cluster	Cluster4	-7.46784e-05	2.19656e-05	92	46	0.00103298	0.00558852	Cluster5	0.00480748
	1069	PWY.6609..adenine.and.adenosine.salvage.III	Cluster	Cluster2	-0.000533564	0.000156797	92	58	0.00102907	0.00558852	Cluster5	0.00479722
	1070	UDPNAGSYN.PWY..UDP.N.acetyl.D.glucosamine.biosynthesis.I	Cluster	Cluster6	-0.00101733	0.000296024	92	89	0.00107446	0.00577139	Cluster5	0.00499225
	1071	PWY.7282..4.amino.2.methyl.5.diphosphomethylpyrimidine.biosynthesis.II	Cluster	Cluster2	-7.82815e-05	2.32331e-05	92	32	0.00112531	0.00600165	Cluster5	0.00520271
	1072	UNINTEGRATED	Cluster	Cluster6	0.0359256	0.0105339	92	92	0.00115854	0.00613536	Cluster5	0.00533878
	1073	PWY.5973..cis.vaccenate.biosynthesis	Cluster	Cluster2	-0.000165586	4.93521e-05	92	58	0.00121993	0.00641529	Cluster5	0.00556692
	1074	P41.PWY..pyruvate.fermentation.to.acetate.and..S..lactate.I	Cluster	Cluster6	-0.000889248	0.000263415	92	87	0.00127901	0.00667926	Cluster5	0.00581762
	1075	PWY.5941..glycogen.degradation.II	Cluster	Cluster4	0.000553614	0.000166464	92	71	0.00129297	0.0067056	Cluster5	0.00585271
	1076	PWY.7790..UMP.biosynthesis.II	Cluster	Cluster3	-0.00118688	0.000358008	92	87	0.00133675	0.00684224	Cluster5	0.0060349
	1077	PWY.7791..UMP.biosynthesis.III	Cluster	Cluster3	-0.00118777	0.000358297	92	87	0.00133751	0.00684224	Cluster5	0.0060349
	1078	UNINTEGRATED	Cluster	Cluster2	0.0162364	0.00490136	92	92	0.00135659	0.00689296	Cluster5	0.00609166
	1079	PWY.6901..superpathway.of.glucose.and.xylose.degradation	Cluster	Cluster2	-6.90995e-05	2.09513e-05	92	31	0.00141126	0.00712259	Cluster5	0.00629009
	1080	ARO.PWY..chorismate.biosynthesis.I	Cluster	Cluster6	-0.000767355	0.000229964	92	61	0.00145765	0.00730767	Cluster5	0.0064833
	1081	PANTO.PWY..phosphopantothenate.biosynthesis.I	Cluster	Cluster4	-0.000279685	8.53948e-05	92	59	0.00154745	0.00770651	Cluster5	0.00683944
	1082	PWY.5100..pyruvate.fermentation.to.acetate.and.lactate.II	Cluster	Cluster6	-0.000866584	0.000263594	92	88	0.00167374	0.00828059	Cluster5	0.00737441
	1083	PWY.7221..guanosine.ribonucleotides.de.novo.biosynthesis	Cluster	Cluster6	-0.00125869	0.000384791	92	83	0.00174077	0.00855595	Cluster5	0.00763387
	1084	PWY.6385..peptidoglycan.biosynthesis.III..mycobacteria.	Cluster	Cluster6	-0.000730508	0.000223969	92	67	0.00178937	0.00873769	Cluster5	0.00781042
	1085	P124.PWY..Bifidobacterium.shunt	Cluster	Cluster2	-0.000320145	9.94039e-05	92	55	0.0018198	0.00882895	Cluster5	0.00793093
	1086	PWY.6122..5.aminoimidazole.ribonucleotide.biosynthesis.II	Cluster	Cluster6	-0.00102497	0.000315556	92	73	0.00192385	0.00921487	Cluster5	0.00830713
	1087	PWY.6277..superpathway.of.5.aminoimidazole.ribonucleotide.biosynthesis	Cluster	Cluster6	-0.00102497	0.000315556	92	73	0.00192385	0.00921487	Cluster5	0.00830713
	1088	GLYCOGENSYNTH.PWY..glycogen.biosynthesis.I..from.ADP.D.Glucose.	Cluster	Cluster6	-0.000768147	0.000238342	92	64	0.00198377	0.00944173	Cluster5	0.00855272
	1089	NONMEVIPP.PWY..methylerythritol.phosphate.pathway.I	Cluster	Cluster3	-0.000593672	0.000187449	92	57	0.00215074	0.010172	Cluster5	0.00921604
	1090	COA.PWY..coenzyme.A.biosynthesis.I..prokaryotic.	Cluster	Cluster4	-0.000255604	8.08744e-05	92	88	0.00217358	0.0102158	Cluster5	0.00929973
	1091	PWY66.389..phytol.degradation	Cluster	Cluster4	-2.06555e-05	6.57127e-06	92	38	0.00228493	0.0106725	Cluster5	0.00973172
	1092	PWY.7851..coenzyme.A.biosynthesis.II..eukaryotic.	Cluster	Cluster4	-0.000252448	8.07839e-05	92	88	0.00242326	0.0112487	Cluster5	0.0102884
	1093	PWY.5686..UMP.biosynthesis.I	Cluster	Cluster3	-0.00127167	0.000405483	92	87	0.00247108	0.0114003	Cluster5	0.0104612
	1094	HISDEG.PWY..L.histidine.degradation.I	Cluster	Cluster2	-0.00012389	4.02309e-05	92	45	0.00281163	0.0128142	Cluster5	0.0117437
	1095	PWY.7238..sucrose.biosynthesis.II	Cluster	Cluster6	-0.00153535	0.000492796	92	71	0.00280765	0.0128142	Cluster5	0.0117437
	1096	PWY.6385..peptidoglycan.biosynthesis.III..mycobacteria.	Cluster	Cluster3	-0.000807715	0.000263193	92	67	0.00290586	0.0131639	Cluster5	0.0119992
	1097	PWY.7221..guanosine.ribonucleotides.de.novo.biosynthesis	Cluster	Cluster4	0.000488714	0.000159605	92	83	0.00293323	0.0132083	Cluster5	0.0120899
	1098	PWY0.1061..superpathway.of.L.alanine.biosynthesis	Cluster	Cluster2	-0.000289208	9.48661e-05	92	65	0.0030539	0.0135889	Cluster5	0.0125321
	1099	PWY0.1297..superpathway.of.purine.deoxyribonucleosides.degradation	Cluster	Cluster2	-6.64164e-05	2.17862e-05	92	37	0.00305263	0.0135889	Cluster5	0.0125321
	1100	PWY.3001..superpathway.of.L.isoleucine.biosynthesis.I	Cluster	Cluster2	-0.000127434	4.1759e-05	92	41	0.00311408	0.0137752	Cluster5	0.0127604
	1101	PWY.6163..chorismate.biosynthesis.from.3.dehydroquinate	Cluster	Cluster3	-0.000801634	0.000265426	92	61	0.00334089	0.0146921	Cluster5	0.0135908
	1102	PWY.6121..5.aminoimidazole.ribonucleotide.biosynthesis.I	Cluster	Cluster6	-0.000908246	0.000300509	92	71	0.00371441	0.0162397	Cluster5	0.0148947
	1103	PWY.6123..inosine.5..phosphate.biosynthesis.I	Cluster	Cluster3	-0.000953621	0.000319315	92	72	0.00374219	0.0162666	Cluster5	0.0149847
	1104	GLYCOGENSYNTH.PWY..glycogen.biosynthesis.I..from.ADP.D.Glucose.	Cluster	Cluster3	-0.000848454	0.000284174	92	64	0.00382966	0.0165512	Cluster5	0.0153132
	1105	PWY.7328..superpathway.of.UDP.glucose.derived.O.antigen.building.blocks.biosynthesis	Cluster	Cluster4	-6.12139e-05	2.07071e-05	92	44	0.00401202	0.0172402	Cluster5	0.0159968
	1106	PWY.7228..superpathway.of.guanosine.nucleotides.de.novo.biosynthesis.I	Cluster	Cluster2	-0.000152178	5.17412e-05	92	63	0.00420975	0.0179067	Cluster5	0.0166868
	1107	THRESYN.PWY..superpathway.of.L.threonine.biosynthesis	Cluster	Cluster2	-0.000240268	8.17497e-05	92	70	0.00421474	0.0179067	Cluster5	0.0166868
	1108	PWY.5030..L.histidine.degradation.III	Cluster	Cluster2	-0.000100675	3.46717e-05	92	42	0.00467594	0.0197546	Cluster5	0.0182303
	1109	PWY.6124..inosine.5..phosphate.biosynthesis.II	Cluster	Cluster3	-0.000898813	0.000309731	92	71	0.0049069	0.0206145	Cluster5	0.0190515
	1110	PWY.7234..inosine.5..phosphate.biosynthesis.III	Cluster	Cluster3	-0.000921611	0.00031979	92	69	0.00523474	0.0218696	Cluster5	0.0201573
	1111	PHOSLIPSYN.PWY..superpathway.of.phospholipid.biosynthesis.I..bacteria.	Cluster	Cluster4	-5.72614e-05	1.99808e-05	92	41	0.0052865	0.0219638	Cluster5	0.020301
	1112	PWY.3841..folate.transformations.II..plants.	Cluster	Cluster6	-0.000594855	0.000207964	92	78	0.00560092	0.0231422	Cluster5	0.0213047
	1113	ASPASN.PWY..superpathway.of.L.aspartate.and.L.asparagine.biosynthesis	Cluster	Cluster4	-9.53261e-05	3.37214e-05	92	61	0.00583724	0.0239869	Cluster5	0.0220841
	1114	THISYNARA.PWY..superpathway.of.thiamine.diphosphate.biosynthesis.III..eukaryotes.	Cluster	Cluster6	-0.000221971	7.93793e-05	92	52	0.0063606	0.0259955	Cluster5	0.0237761
	1115	ARO.PWY..chorismate.biosynthesis.I	Cluster	Cluster3	-0.000755018	0.000269966	92	61	0.00642605	0.026121	Cluster5	0.0239889
	1116	PWY.5686..UMP.biosynthesis.I	Cluster	Cluster4	0.00041466	0.000148554	92	87	0.00647099	0.0261623	Cluster5	0.0240927
	1117	PWY.6122..5.aminoimidazole.ribonucleotide.biosynthesis.II	Cluster	Cluster3	-0.00103602	0.000371317	92	73	0.0065683	0.0262732	Cluster5	0.0243582
	1118	PWY.6277..superpathway.of.5.aminoimidazole.ribonucleotide.biosynthesis	Cluster	Cluster3	-0.00103602	0.000371317	92	73	0.0065683	0.0262732	Cluster5	0.0243582
	1119	PWY.7117..C4.photosynthetic.carbon.assimilation.cycle..PEPCK.type	Cluster	Cluster2	-9.77206e-05	3.55784e-05	92	42	0.00733584	0.0288884	Cluster5	0.0268209
	1120	PWY66.409..superpathway.of.purine.nucleotide.salvage	Cluster	Cluster2	-8.6369e-05	3.14113e-05	92	32	0.00728645	0.0288884	Cluster5	0.0267392
	1121	TRNA.CHARGING.PWY..tRNA.charging	Cluster	Cluster6	-0.00102543	0.000373478	92	86	0.00733734	0.0288884	Cluster5	0.0268209
	1122	PWY.5941..glycogen.degradation.II	Cluster	Cluster6	-0.00108257	0.000391118	92	71	0.00744557	0.0290107	Cluster5	0.0270407
	1123	PWY.7238..sucrose.biosynthesis.II	Cluster	Cluster3	-0.0015918	0.000579768	92	71	0.0074299	0.0290107	Cluster5	0.0270187
	1124	PYRIDNUCSYN.PWY..NAD.de.novo.biosynthesis.I..from.aspartate.	Cluster	Cluster4	-0.000140461	5.15547e-05	92	53	0.00780544	0.0302561	Cluster5	0.0281657
	1125	PWY.2942..L.lysine.biosynthesis.III	Cluster	Cluster6	-0.000381895	0.000140751	92	63	0.00853578	0.0329175	Cluster5	0.030683
	1126	FASYN.ELONG.PWY..fatty.acid.elongation....saturated	Cluster	Cluster6	5.61606e-05	2.07954e-05	92	14	0.00873393	0.0335098	Cluster5	0.0311958
	1127	PWY.5659..GDP.mannose.biosynthesis	Cluster	Cluster4	-7.24201e-05	2.71141e-05	92	47	0.0091875	0.0350711	Cluster5	0.0326087
	1128	PWY.7208..superpathway.of.pyrimidine.nucleobases.salvage	Cluster	Cluster2	-0.000144957	5.44892e-05	92	68	0.00930916	0.035356	Cluster5	0.0329572
	1129	P124.PWY..Bifidobacterium.shunt	Cluster	Cluster4	0.000211097	8.03281e-05	92	55	0.0103211	0.0390022	Cluster5	0.0361301
	1130	PWY.6121..5.aminoimidazole.ribonucleotide.biosynthesis.I	Cluster	Cluster3	-0.000910332	0.000350295	92	71	0.011048	0.0415403	Cluster5	0.0383405
	1131	PWY.2942..L.lysine.biosynthesis.III	Cluster	Cluster4	-0.000149296	5.81434e-05	92	63	0.0119652	0.0447291	Cluster5	0.0410777
	1132	PWY.7664..oleate.biosynthesis.IV..anaerobic.	Cluster	Cluster6	5.12835e-05	1.98671e-05	92	14	0.012015	0.0447291	Cluster5	0.0410878
	1133	PWY.7328..superpathway.of.UDP.glucose.derived.O.antigen.building.blocks.biosynthesis	Cluster	Cluster6	-0.000122978	4.77663e-05	92	44	0.0122414	0.0453475	Cluster5	0.0417604
	1134	PWY.6902..chitin.degradation.II..Vibrio.	Cluster	Cluster6	1.41206e-05	5.35665e-06	92	14	0.0123732	0.045611	Cluster5	0.0421588
	1135	P42.PWY..incomplete.reductive.TCA.cycle	Cluster	Cluster2	-2.82713e-05	1.10945e-05	92	24	0.012592	0.0461913	Cluster5	0.042748
	1136	PWY.6126..superpathway.of.adenosine.nucleotides.de.novo.biosynthesis.II	Cluster	Cluster2	-0.000155395	6.12967e-05	92	63	0.0130622	0.0476834	Cluster5	0.0439209
	1137	PWY.7220..adenosine.deoxyribonucleotides.de.novo.biosynthesis.II	Cluster	Cluster2	-8.42764e-05	3.33309e-05	92	63	0.0133093	0.0481183	Cluster5	0.0445387
	1138	PWY.7222..guanosine.deoxyribonucleotides.de.novo.biosynthesis.II	Cluster	Cluster2	-8.42764e-05	3.33309e-05	92	63	0.0133093	0.0481183	Cluster5	0.0445387
	1139	PWY.7229..superpathway.of.adenosine.nucleotides.de.novo.biosynthesis.I	Cluster	Cluster2	-0.000220408	8.75279e-05	92	63	0.013659	0.0491462	Cluster5	0.0454921
	1140	PWY.5941..glycogen.degradation.II	Cluster	Cluster3	-0.00115927	0.000461404	92	71	0.0139822	0.0500697	Cluster5	0.0465136
	1141	PWY.7199..pyrimidine.deoxyribonucleosides.salvage	Cluster	Cluster2	-0.000352022	0.000140976	92	66	0.0144091	0.0513538	Cluster5	0.0474286
	1142	PWY0.301..L.ascorbate.degradation.I..bacterial..anaerobic.	Cluster	Cluster2	-6.16767e-05	2.47727e-05	92	28	0.0147205	0.0522161	Cluster5	0.0482939
	1143	PWY.2941..L.lysine.biosynthesis.II	Cluster	Cluster2	-0.000106124	4.27192e-05	92	47	0.014904	0.0526188	Cluster5	0.0486587
	1144	PWY66.429..fatty.acid.biosynthesis.initiation..mitochondria.	Cluster	Cluster2	-8.17994e-05	3.29763e-05	92	56	0.0153005	0.0537663	Cluster5	0.0498233
	1145	ASPASN.PWY..superpathway.of.L.aspartate.and.L.asparagine.biosynthesis	Cluster	Cluster3	-0.000231374	9.40862e-05	92	61	0.0159704	0.0558593	Cluster5	0.0517198
	1146	PWY.5103..L.isoleucine.biosynthesis.III	Cluster	Cluster4	-7.73219e-05	3.14842e-05	92	49	0.0160718	0.0559538	Cluster5	0.0519884
	1147	PWY.5005..biotin.biosynthesis.II	Cluster	Cluster2	-1.94474e-05	7.95828e-06	92	25	0.0165761	0.0574435	Cluster5	0.0533739
	1148	PWY.6270..isoprene.biosynthesis.I	Cluster	Cluster6	-0.000348822	0.000142424	92	53	0.017009	0.0585578	Cluster5	0.0546425
	1149	PWY.6282..palmitoleate.biosynthesis.I..from..5Z..dodec.5.enoate.	Cluster	Cluster6	4.61809e-05	1.88796e-05	92	14	0.0170534	0.0585578	Cluster5	0.0547228
	1150	VALSYN.PWY..L.valine.biosynthesis	Cluster	Cluster4	-8.99392e-05	3.70414e-05	92	53	0.0172846	0.059082	Cluster5	0.0554014
	1151	PWY.7197..pyrimidine.deoxyribonucleotide.phosphorylation	Cluster	Cluster2	-7.4653e-05	3.0968e-05	92	64	0.018187	0.061885	Cluster5	0.0579632
	1152	ILEUSYN.PWY..L.isoleucine.biosynthesis.I..from.threonine.	Cluster	Cluster4	-8.30336e-05	3.45284e-05	92	49	0.0183341	0.0621048	Cluster5	0.0583001
	1153	GLYCOLYSIS.E.D..superpathway.of.glycolysis.and.the.Entner.Doudoroff.pathway	Cluster	Cluster2	-2.63011e-05	1.09741e-05	92	24	0.0186874	0.0630175	Cluster5	0.0592892
	1154	PWY.6700..queuosine.biosynthesis.I..de.novo.	Cluster	Cluster6	-0.000406272	0.000168812	92	56	0.0189892	0.0637494	Cluster5	0.060111
	1155	P441.PWY..superpathway.of.N.acetylneuraminate.degradation	Cluster	Cluster2	-2.49129e-05	1.044e-05	92	22	0.0191872	0.0640747	Cluster5	0.0605333
	1156	PWY.7560..methylerythritol.phosphate.pathway.II	Cluster	Cluster6	-0.000331776	0.000138253	92	53	0.0192565	0.0640747	Cluster5	0.0606839
	1157	PWY.5097..L.lysine.biosynthesis.VI	Cluster	Cluster4	-0.000105956	4.46184e-05	92	60	0.0197777	0.065519	Cluster5	0.062048
	1158	PWY.8004..Entner.Doudoroff.pathway.I	Cluster	Cluster2	-2.15271e-05	9.07523e-06	92	24	0.0198942	0.0656159	Cluster5	0.062344
	1159	PWY.7111..pyruvate.fermentation.to.isobutanol..engineered.	Cluster	Cluster4	-7.32329e-05	3.12191e-05	92	49	0.0212897	0.0699119	Cluster5	0.0663473
	1160	THISYNARA.PWY..superpathway.of.thiamine.diphosphate.biosynthesis.III..eukaryotes.	Cluster	Cluster3	-0.000221971	9.48764e-05	92	52	0.0215956	0.0706083	Cluster5	0.0672263
	1161	PANTOSYN.PWY..superpathway.of.coenzyme.A.biosynthesis.I..bacteria.	Cluster	Cluster6	-0.000352916	0.000150608	92	55	0.0223064	0.0719932	Cluster5	0.0692089
	1162	PWY.7323..superpathway.of.GDP.mannose.derived.O.antigen.building.blocks.biosynthesis	Cluster	Cluster2	-3.18106e-05	1.36552e-05	92	27	0.022156	0.0719932	Cluster5	0.0688944
	1163	PWY.7977..L.methionine.biosynthesis.IV	Cluster	Cluster2	-2.98084e-05	1.28034e-05	92	19	0.022224	0.0719932	Cluster5	0.0690294
	1164	PWY.5097..L.lysine.biosynthesis.VI	Cluster	Cluster6	-0.000246513	0.000107172	92	60	0.0246277	0.0788087	Cluster5	0.0758254
	1165	PWY.6823..molybdopterin.biosynthesis	Cluster	Cluster4	-4.18891e-05	1.83062e-05	92	47	0.0245477	0.0788087	Cluster5	0.0757449
	1166	COA.PWY.1..superpathway.of.coenzyme.A.biosynthesis.III..mammals.	Cluster	Cluster3	0.000581347	0.000256771	92	79	0.0260571	0.0830293	Cluster5	0.0797025
	1167	ARGSYN.PWY..L.arginine.biosynthesis.I..via.L.ornithine.	Cluster	Cluster2	-6.44427e-05	2.86489e-05	92	22	0.0272647	0.0857868	Cluster5	0.0825874
	1168	PWY.2942..L.lysine.biosynthesis.III	Cluster	Cluster3	-0.000366529	0.000163015	92	63	0.0271126	0.0857868	Cluster5	0.0823041
	1169	PWY.5676..acetyl.CoA.fermentation.to.butanoate.II	Cluster	Cluster4	-1.59861e-05	7.11192e-06	92	13	0.0271519	0.0857868	Cluster5	0.0823343
	1170	X1CMET2.PWY..folate.transformations.III..E..coli.	Cluster	Cluster2	-4.01183e-05	1.78232e-05	92	20	0.0274327	0.0859558	Cluster5	0.0830068
	1171	PWY.1042..glycolysis.IV	Cluster	Cluster6	-0.000478696	0.00021371	92	73	0.028609	0.0892697	Cluster5	0.0862875
	1172	HSERMETANA.PWY..L.methionine.biosynthesis.III	Cluster	Cluster6	-0.000218298	9.7553e-05	92	57	0.0287599	0.0893697	Cluster5	0.0866497
	1173	ARGSYN.PWY..L.arginine.biosynthesis.I..via.L.ornithine.	Cluster	Cluster4	-5.34455e-05	2.42998e-05	92	22	0.030514	0.0944302	Cluster5	0.0915421
	1174	GLUCOSE1PMETAB.PWY..glucose.and.glucose.1.phosphate.degradation	Cluster	Cluster2	-0.000251353	0.000114733	92	22	0.031326	0.0965457	Cluster5	0.0935597
	1175	PWY.3841..folate.transformations.II..plants.	Cluster	Cluster2	-0.000234739	0.000107038	92	78	0.0314835	0.0966352	Cluster5	0.0938497
	1176	COMPLETE.ARO.PWY..superpathway.of.aromatic.amino.acid.biosynthesis	Cluster	Cluster6	-0.000356444	0.000163142	92	55	0.0325601	0.0992426	Cluster5	0.0963437
	1177	PWY.6163..chorismate.biosynthesis.from.3.dehydroquinate	Cluster	Cluster4	-0.00020623	9.49465e-05	92	61	0.032597	0.0992426	Cluster5	0.0963513
	1178	PWY.7953..UDP.N.acetylmuramoyl.pentapeptide.biosynthesis.III..meso.diaminopimelate.containing.	Cluster	Cluster6	-0.000590076	0.000271543	92	56	0.033513	0.10162	Cluster5	0.0986442
	1179	PWY.5918..superpathway.of.heme.b.biosynthesis.from.glutamate	Cluster	Cluster2	-4.13666e-05	1.92272e-05	92	29	0.0342259	0.103365	Cluster5	0.100427
	1180	PWY0.845..superpathway.of.pyridoxal.5..phosphate.biosynthesis.and.salvage	Cluster	Cluster2	-3.02218e-05	1.41163e-05	92	25	0.0350781	0.105515	Cluster5	0.1025
	1181	GLYCOGENSYNTH.PWY..glycogen.biosynthesis.I..from.ADP.D.Glucose.	Cluster	Cluster4	-0.000221315	0.000103803	92	64	0.0358456	0.106968	Cluster5	0.103878
	1182	PWY.7198..pyrimidine.deoxyribonucleotides.de.novo.biosynthesis.IV	Cluster	Cluster6	-0.000154048	7.1859e-05	92	57	0.0357506	0.106968	Cluster5	0.10371
	1183	PWY.5676..acetyl.CoA.fermentation.to.butanoate.II	Cluster	Cluster2	-1.77873e-05	8.34164e-06	92	13	0.0361551	0.107465	Cluster5	0.104667
	1184	ARGSYNBSUB.PWY..L.arginine.biosynthesis.II..acetyl.cycle.	Cluster	Cluster4	-4.97923e-05	2.34631e-05	92	24	0.0366907	0.108627	Cluster5	0.105999
	1185	PWY.7560..methylerythritol.phosphate.pathway.II	Cluster	Cluster4	-0.000109356	5.18073e-05	92	53	0.0379037	0.111779	Cluster5	0.109167
	1186	GLUTORN.PWY..L.ornithine.biosynthesis.I	Cluster	Cluster4	-3.57425e-05	1.6971e-05	92	23	0.0381284	0.112002	Cluster5	0.10959
	1187	PWY.6588..pyruvate.fermentation.to.acetone	Cluster	Cluster2	-1.18868e-05	5.75999e-06	92	21	0.0394204	0.115347	Cluster5	0.112727
	1188	PWY66.389..phytol.degradation	Cluster	Cluster6	-3.09425e-05	1.48268e-05	92	38	0.0398206	0.116066	Cluster5	0.11364
	1189	COA.PWY..coenzyme.A.biosynthesis.I..prokaryotic.	Cluster	Cluster3	0.000461708	0.000221261	92	88	0.0403273	0.116192	Cluster5	0.114737
	1190	HEME.BIOSYNTHESIS.II..heme.b.biosynthesis.I..aerobic.	Cluster	Cluster2	-2.86422e-05	1.37442e-05	92	33	0.0400987	0.116192	Cluster5	0.114318
	1191	PWY.6700..queuosine.biosynthesis.I..de.novo.	Cluster	Cluster4	-0.000134584	6.45519e-05	92	56	0.0402204	0.116192	Cluster5	0.114549
	1192	PWY.6936..seleno.amino.acid.biosynthesis..plants.	Cluster	Cluster3	-0.000210492	0.00010118	92	60	0.0405545	0.116401	Cluster5	0.115161
	1193	HISTSYN.PWY..L.histidine.biosynthesis	Cluster	Cluster4	-3.83916e-05	1.85044e-05	92	13	0.0409997	0.117075	Cluster5	0.116093
	1194	PWY4LZ.257..superpathway.of.fermentation..Chlamydomonas.reinhardtii.	Cluster	Cluster2	-2.23513e-05	1.07507e-05	92	15	0.0411009	0.117075	Cluster5	0.116232
	1195	PWY.6270..isoprene.biosynthesis.I	Cluster	Cluster4	-0.000110937	5.35397e-05	92	53	0.0414688	0.117677	Cluster5	0.117155
	1196	ARGSYNBSUB.PWY..L.arginine.biosynthesis.II..acetyl.cycle.	Cluster	Cluster2	-5.71657e-05	2.76025e-05	92	24	0.041649	0.117745	Cluster5	0.117546
	1197	PWY.724..superpathway.of.L.lysine..L.threonine.and.L.methionine.biosynthesis.II	Cluster	Cluster6	-0.000202482	9.77344e-05	92	58	0.0422493	0.118994	Cluster5	0.118763
	1198	PWY.5097..L.lysine.biosynthesis.VI	Cluster	Cluster3	-0.000255526	0.000124764	92	60	0.0436328	0.122255	Cluster5	0.121878
	1199	PWY.6270..isoprene.biosynthesis.I	Cluster	Cluster3	-0.000314095	0.000153437	92	53	0.0437323	0.122255	Cluster5	0.121956
	1200	COLANSYN.PWY..colanic.acid.building.blocks.biosynthesis	Cluster	Cluster4	-4.72757e-05	2.32144e-05	92	41	0.0449347	0.125151	Cluster5	0.124814
	1201	PWY.7560..methylerythritol.phosphate.pathway.II	Cluster	Cluster3	-0.000301369	0.000148549	92	53	0.0456119	0.126569	Cluster5	0.126196
	1202	PWY.5981..CDP.diacylglycerol.biosynthesis.III	Cluster	Cluster2	0.000128506	6.36485e-05	92	30	0.0465672	0.128031	Cluster5	0.128334
	1203	PWY.7328..superpathway.of.UDP.glucose.derived.O.antigen.building.blocks.biosynthesis	Cluster	Cluster3	-0.000115053	5.68531e-05	92	44	0.0464459	0.128031	Cluster5	0.128125
	1204	PWY4LZ.257..superpathway.of.fermentation..Chlamydomonas.reinhardtii.	Cluster	Cluster4	-1.86644e-05	9.2482e-06	92	15	0.0467701	0.128031	Cluster5	0.128756
	1205	PYRIDNUCSYN.PWY..NAD.de.novo.biosynthesis.I..from.aspartate.	Cluster	Cluster3	-0.000291976	0.000144762	92	53	0.0468197	0.128031	Cluster5	0.128756
	1206	PWY.7356..thiamine.diphosphate.salvage.IV..yeast.	Cluster	Cluster2	-6.22598e-05	3.09374e-05	92	21	0.0476206	0.129749	Cluster5	0.130597
	1207	PWY.7383..anaerobic.energy.metabolism..invertebrates..cytosol.	Cluster	Cluster2	-3.70946e-05	1.85146e-05	92	25	0.0483978	0.13139	Cluster5	0.13222
	1208	PWY.724..superpathway.of.L.lysine..L.threonine.and.L.methionine.biosynthesis.II	Cluster	Cluster3	-0.000229762	0.000115651	92	58	0.0503617	0.13623	Cluster5	0.136912
	1209	PWY.5695..inosine.5..phosphate.degradation	Cluster	Cluster3	-0.000443389	0.000225122	92	60	0.0520896	0.13901	Cluster5	0.140524
	1210	PWY.6305..superpathway.of.putrescine.biosynthesis	Cluster	Cluster2	-8.47825e-06	4.35693e-06	92	31	0.0520903	0.13901	Cluster5	0.140524
	1211	PWY.6588..pyruvate.fermentation.to.acetone	Cluster	Cluster4	-9.49712e-06	4.88376e-06	92	21	0.0522237	0.13901	Cluster5	0.140614
	1212	PWY.6700..queuosine.biosynthesis.I..de.novo.	Cluster	Cluster3	-0.000362949	0.000184444	92	56	0.0523138	0.13901	Cluster5	0.140722
	1213	RIBOSYN2.PWY..flavin.biosynthesis.I..bacteria.and.plants.	Cluster	Cluster4	-7.42067e-05	3.76756e-05	92	54	0.0522234	0.13901	Cluster5	0.140614
	1214	PWY.7953..UDP.N.acetylmuramoyl.pentapeptide.biosynthesis.III..meso.diaminopimelate.containing.	Cluster	Cluster3	-0.000611236	0.000311146	92	56	0.0526824	0.139497	Cluster5	0.141198
	1215	PWY66.409..superpathway.of.purine.nucleotide.salvage	Cluster	Cluster4	-4.99588e-05	2.54702e-05	92	32	0.0533057	0.140652	Cluster5	0.142436
	1216	PYRIDNUCSYN.PWY..NAD.de.novo.biosynthesis.I..from.aspartate.	Cluster	Cluster6	-0.000246237	0.000125391	92	53	0.0539591	0.141878	Cluster5	0.143908
	1217	PWY.6969..TCA.cycle.V..2.oxoglutarate.synthase.	Cluster	Cluster2	-3.92687e-05	2.02783e-05	92	31	0.056127	0.146554	Cluster5	0.148843
	1218	PWY66.399..gluconeogenesis.III	Cluster	Cluster2	-2.30377e-05	1.189e-05	92	16	0.0559681	0.146554	Cluster5	0.148561
	1219	COMPLETE.ARO.PWY..superpathway.of.aromatic.amino.acid.biosynthesis	Cluster	Cluster3	-0.000351071	0.000182467	92	55	0.0576245	0.149943	Cluster5	0.151954
	1220	PANTOSYN.PWY..superpathway.of.coenzyme.A.biosynthesis.I..bacteria.	Cluster	Cluster3	-0.000327997	0.000171318	92	55	0.0588408	0.151535	Cluster5	0.154149
	1221	PWY.7238..sucrose.biosynthesis.II	Cluster	Cluster4	0.0003998	0.000208722	92	71	0.0587233	0.151535	Cluster5	0.153984
	1222	RIBOSYN2.PWY..flavin.biosynthesis.I..bacteria.and.plants.	Cluster	Cluster6	-0.000185823	9.65634e-05	92	54	0.0586774	0.151535	Cluster5	0.153984
	1223	PWY.7282..4.amino.2.methyl.5.diphosphomethylpyrimidine.biosynthesis.II	Cluster	Cluster4	-3.62923e-05	1.90172e-05	92	32	0.0597815	0.153432	Cluster5	0.156467
	1224	FERMENTATION.PWY..mixed.acid.fermentation	Cluster	Cluster2	-4.57376e-05	2.40019e-05	92	29	0.0600414	0.153575	Cluster5	0.157001
	1225	NONOXIPENT.PWY..pentose.phosphate.pathway..non.oxidative.branch..I	Cluster	Cluster4	-0.000108742	5.72543e-05	92	57	0.0611175	0.155271	Cluster5	0.159075
	1226	PWY66.399..gluconeogenesis.III	Cluster	Cluster4	-1.87835e-05	9.89184e-06	92	16	0.0609182	0.155271	Cluster5	0.158851
	1227	PWY.3841..folate.transformations.II..plants.	Cluster	Cluster4	-0.00017326	9.15086e-05	92	78	0.0617171	0.156267	Cluster5	0.160043
	1228	PPGPPMET.PWY..ppGpp.metabolism	Cluster	Cluster2	-1.80359e-05	9.57531e-06	92	26	0.0630033	0.158988	Cluster5	0.162778
	1229	PWY.5913..partial.TCA.cycle..obligate.autotrophs.	Cluster	Cluster2	-5.73243e-05	3.0628e-05	92	28	0.0646185	0.162519	Cluster5	0.165884
	1230	HEMESYN2.PWY..heme.b.biosynthesis.II..oxygen.independent.	Cluster	Cluster2	-3.15763e-05	1.68847e-05	92	32	0.0648432	0.16254	Cluster5	0.166308
	1231	PWY.6151..S.adenosyl.L.methionine.salvage.I	Cluster	Cluster4	0.000209711	0.000112392	92	78	0.0654725	0.163572	Cluster5	0.167464
	1232	FASYN.ELONG.PWY..fatty.acid.elongation....saturated	Cluster	Cluster2	-1.98511e-05	1.06908e-05	92	14	0.0672714	0.16751	Cluster5	0.171909
	1233	PWY.5189..tetrapyrrole.biosynthesis.II..from.glycine.	Cluster	Cluster4	-3.1367e-05	1.69766e-05	92	45	0.0684964	0.169814	Cluster5	0.174405
	1234	PWY.6282..palmitoleate.biosynthesis.I..from..5Z..dodec.5.enoate.	Cluster	Cluster2	-1.78831e-05	9.68671e-06	92	14	0.0687102	0.169814	Cluster5	0.174734
	1235	PWY.7664..oleate.biosynthesis.IV..anaerobic.	Cluster	Cluster2	-1.88319e-05	1.02046e-05	92	14	0.0688741	0.169814	Cluster5	0.174734
	1236	PWY.6123..inosine.5..phosphate.biosynthesis.I	Cluster	Cluster4	0.00021152	0.000115126	92	72	0.0695846	0.171005	Cluster5	0.176218
	1237	PWY.7115..C4.photosynthetic.carbon.assimilation.cycle..NAD.ME.type	Cluster	Cluster2	-2.06539e-05	1.12561e-05	92	40	0.0699361	0.171309	Cluster5	0.17679
	1238	PWY.7663..gondoate.biosynthesis..anaerobic.	Cluster	Cluster3	-0.000179677	9.81591e-05	92	55	0.0707186	0.172664	Cluster5	0.178287
	1239	PWY.841..superpathway.of.purine.nucleotides.de.novo.biosynthesis.I	Cluster	Cluster6	-0.00020577	0.000112795	92	54	0.0726984	0.176923	Cluster5	0.182297
	1240	GLUTORN.PWY..L.ornithine.biosynthesis.I	Cluster	Cluster2	-3.60286e-05	1.98778e-05	92	23	0.0738575	0.179164	Cluster5	0.184545
	1241	PWY.7234..inosine.5..phosphate.biosynthesis.III	Cluster	Cluster4	0.000211308	0.000117018	92	69	0.0744677	0.180063	Cluster5	0.185575
	1242	PWY.5973..cis.vaccenate.biosynthesis	Cluster	Cluster6	-0.000173642	9.63151e-05	92	58	0.0757571	0.180855	Cluster5	0.187624
	1243	PWY.5973..cis.vaccenate.biosynthesis	Cluster	Cluster3	-0.000206705	0.00011473	92	58	0.0754643	0.180855	Cluster5	0.187592
	1244	PWY.6703..preQ0.biosynthesis	Cluster	Cluster6	-0.000176697	9.77635e-05	92	54	0.0752595	0.180855	Cluster5	0.187382
	1245	PWY66.389..phytol.degradation	Cluster	Cluster3	-3.18532e-05	1.77214e-05	92	38	0.0757349	0.180855	Cluster5	0.187624
	1246	PWY.5989..stearate.biosynthesis.II..bacteria.and.plants.	Cluster	Cluster2	-2.78576e-05	1.55685e-05	92	33	0.0773201	0.184002	Cluster5	0.190822
	1247	ANAGLYCOLYSIS.PWY..glycolysis.III..from.glucose.	Cluster	Cluster6	-0.000425169	0.000237184	92	55	0.0779307	0.18487	Cluster5	0.191589
	1248	HISTSYN.PWY..L.histidine.biosynthesis	Cluster	Cluster2	-3.87152e-05	2.17266e-05	92	13	0.0786751	0.18553	Cluster5	0.192879
	1249	PWY.7357..thiamine.phosphate.formation.from.pyrithiamine.and.oxythiamine..yeast.	Cluster	Cluster6	-0.000299198	0.000168166	92	56	0.0787023	0.18553	Cluster5	0.192879
	1250	X1CMET2.PWY..folate.transformations.III..E..coli.	Cluster	Cluster4	-2.69643e-05	1.53139e-05	92	20	0.0819268	0.192528	Cluster5	0.199737
	1251	PWY.6823..molybdopterin.biosynthesis	Cluster	Cluster3	-8.83499e-05	5.05627e-05	92	47	0.0844246	0.19778	Cluster5	0.205292
	1252	HSERMETANA.PWY..L.methionine.biosynthesis.III	Cluster	Cluster3	-0.000197742	0.000113639	92	57	0.085469	0.199605	Cluster5	0.207473
	1253	VALSYN.PWY..L.valine.biosynthesis	Cluster	Cluster3	-0.00018039	0.000104246	92	53	0.0871219	0.202835	Cluster5	0.210938
	1254	ANAEROFRUCAT.PWY..homolactic.fermentation	Cluster	Cluster6	-0.000209853	0.000121044	92	50	0.0876278	0.203383	Cluster5	0.211981
	1255	PWY.5695..inosine.5..phosphate.degradation	Cluster	Cluster6	-0.000340197	0.000196271	92	60	0.0879848	0.203583	Cluster5	0.212661
	1256	PWY.8178..pentose.phosphate.pathway..non.oxidative.branch..II	Cluster	Cluster4	-8.45342e-05	4.90095e-05	92	54	0.0883866	0.203886	Cluster5	0.213449
	1257	PWY.6282..palmitoleate.biosynthesis.I..from..5Z..dodec.5.enoate.	Cluster	Cluster4	-1.41272e-05	8.22729e-06	92	14	0.0895458	0.204056	Cluster5	0.215324
	1258	PWY.7229..superpathway.of.adenosine.nucleotides.de.novo.biosynthesis.I	Cluster	Cluster6	-0.000302366	0.000175203	92	63	0.0890564	0.204056	Cluster5	0.214651
	1259	PWY.724..superpathway.of.L.lysine..L.threonine.and.L.methionine.biosynthesis.II	Cluster	Cluster4	-7.1872e-05	4.18372e-05	92	58	0.0893729	0.204056	Cluster5	0.215092
	1260	PYRIDOXSYN.PWY..pyridoxal.5..phosphate.biosynthesis.I	Cluster	Cluster2	-1.99043e-05	1.15767e-05	92	26	0.0891132	0.204056	Cluster5	0.214651
	1261	CITRULBIO.PWY..L.citrulline.biosynthesis	Cluster	Cluster6	2.35354e-05	1.37114e-05	92	22	0.0904588	0.204932	Cluster5	0.216935
	1262	ILEUSYN.PWY..L.isoleucine.biosynthesis.I..from.threonine.	Cluster	Cluster3	-0.000165566	9.69009e-05	92	49	0.0911351	0.204932	Cluster5	0.217841
	1263	PWY.5103..L.isoleucine.biosynthesis.III	Cluster	Cluster3	-0.000151263	8.83601e-05	92	49	0.0905248	0.204932	Cluster5	0.216935
	1264	PWY.5121..superpathway.of.geranylgeranyl.diphosphate.biosynthesis.II..via.MEP.	Cluster	Cluster2	-4.93385e-05	2.88801e-05	92	23	0.0911317	0.204932	Cluster5	0.217841
	1265	PWY.7664..oleate.biosynthesis.IV..anaerobic.	Cluster	Cluster4	-1.4828e-05	8.68275e-06	92	14	0.0912928	0.204932	Cluster5	0.218032
	1266	FASYN.ELONG.PWY..fatty.acid.elongation....saturated	Cluster	Cluster4	-1.54161e-05	9.11178e-06	92	14	0.0943052	0.211064	Cluster5	0.224085
	1267	PWY.7204..pyridoxal.5..phosphate.salvage.II..plants.	Cluster	Cluster2	-9.31242e-06	5.58972e-06	92	11	0.0958891	0.213972	Cluster5	0.22708
	1268	BRANCHED.CHAIN.AA.SYN.PWY..superpathway.of.branched.chain.amino.acid.biosynthesis	Cluster	Cluster4	-5.62676e-05	3.34569e-05	92	44	0.0961964	0.214023	Cluster5	0.227616
	1269	PWY0.1586..peptidoglycan.maturation..meso.diaminopimelate.containing.	Cluster	Cluster3	-0.000216845	0.000129256	92	64	0.0970129	0.215203	Cluster5	0.22897
	1270	PWY.4041...gamma..glutamyl.cycle	Cluster	Cluster3	-9.93402e-05	5.9441e-05	92	46	0.0990778	0.218494	Cluster5	0.232866
	1271	PWY.5659..GDP.mannose.biosynthesis	Cluster	Cluster6	-0.000124996	7.47183e-05	92	47	0.0989436	0.218494	Cluster5	0.232745
	1272	ARO.PWY..chorismate.biosynthesis.I	Cluster	Cluster4	-0.000161312	9.70411e-05	92	61	0.100061	0.218739	Cluster5	0.234482
	1273	COA.PWY.1..superpathway.of.coenzyme.A.biosynthesis.III..mammals.	Cluster	Cluster4	-0.000151084	9.07283e-05	92	79	0.0996163	0.218739	Cluster5	0.233936
	1274	POLYISOPRENSYN.PWY..polyisoprenoid.biosynthesis..E..coli.	Cluster	Cluster2	-4.0917e-05	2.4599e-05	92	30	0.0999018	0.218739	Cluster5	0.234411
	1275	PWY.7111..pyruvate.fermentation.to.isobutanol..engineered.	Cluster	Cluster3	-0.000143976	8.74873e-05	92	49	0.1035	0.225599	Cluster5	0.241242
	1276	PWY.6897..thiamine.diphosphate.salvage.II	Cluster	Cluster6	-0.000181286	0.000110497	92	49	0.105562	0.228769	Cluster5	0.244629
	1277	THRESYN.PWY..superpathway.of.L.threonine.biosynthesis	Cluster	Cluster3	-0.000310517	0.000189698	92	70	0.105264	0.228769	Cluster5	0.24414
	1278	PWY.6703..preQ0.biosynthesis	Cluster	Cluster3	-0.00018306	0.000112087	92	54	0.106055	0.229177	Cluster5	0.24557
	1279	PWY.7198..pyrimidine.deoxyribonucleotides.de.novo.biosynthesis.IV	Cluster	Cluster3	-0.000136519	8.41348e-05	92	57	0.10841	0.232927	Cluster5	0.250404
	1280	PWY.841..superpathway.of.purine.nucleotides.de.novo.biosynthesis.I	Cluster	Cluster3	-0.000198204	0.000122067	92	54	0.108116	0.232927	Cluster5	0.24993
	1281	THISYNARA.PWY..superpathway.of.thiamine.diphosphate.biosynthesis.III..eukaryotes.	Cluster	Cluster4	-5.68017e-05	3.51811e-05	92	52	0.110029	0.235732	Cluster5	0.25343
	1282	PWY.2941..L.lysine.biosynthesis.II	Cluster	Cluster4	-5.6813e-05	3.52752e-05	92	47	0.110968	0.236397	Cluster5	0.255055
	1283	PWY0.1477..ethanolamine.utilization	Cluster	Cluster6	0.000109757	6.79125e-05	92	49	0.110745	0.236397	Cluster5	0.25475
	1284	PWY0.1061..superpathway.of.L.alanine.biosynthesis	Cluster	Cluster4	0.000126439	7.87433e-05	92	65	0.112004	0.237929	Cluster5	0.257014
	1285	PWY.6126..superpathway.of.adenosine.nucleotides.de.novo.biosynthesis.II	Cluster	Cluster6	-0.000197112	0.000122513	92	63	0.112386	0.238069	Cluster5	0.257682
	1286	ANAGLYCOLYSIS.PWY..glycolysis.III..from.glucose.	Cluster	Cluster3	-0.00043222	0.000271282	92	55	0.114744	0.241702	Cluster5	0.262446
	1287	THRESYN.PWY..superpathway.of.L.threonine.biosynthesis	Cluster	Cluster6	-0.000253023	0.000158713	92	70	0.114513	0.241702	Cluster5	0.262131
	1288	PWY.7357..thiamine.phosphate.formation.from.pyrithiamine.and.oxythiamine..yeast.	Cluster	Cluster3	-0.000319795	0.000200997	92	56	0.115226	0.24204	Cluster5	0.263121
	1289	CALVIN.PWY..Calvin.Benson.Bassham.cycle	Cluster	Cluster3	-0.000281791	0.000178028	92	50	0.117188	0.245474	Cluster5	0.267165
	1290	ANAEROFRUCAT.PWY..homolactic.fermentation	Cluster	Cluster3	-0.000225381	0.000142512	92	50	0.117579	0.245609	Cluster5	0.267623
	1291	PWY.2941..L.lysine.biosynthesis.II	Cluster	Cluster6	-0.000137631	8.70399e-05	92	47	0.118503	0.246172	Cluster5	0.269073
	1292	RIBOSYN2.PWY..flavin.biosynthesis.I..bacteria.and.plants.	Cluster	Cluster3	-0.000169143	0.000107224	92	54	0.118327	0.246172	Cluster5	0.268891
	1293	PWY.5484..glycolysis.II..from.fructose.6.phosphate.	Cluster	Cluster6	-0.000225338	0.000142891	92	52	0.119724	0.248024	Cluster5	0.271407
	1294	GLCMANNANAUT.PWY..superpathway.of.N.acetylglucosamine..N.acetylmannosamine.and.N.acetylneuraminate.degradation	Cluster	Cluster6	9.80582e-05	6.22147e-05	92	44	0.120074	0.248064	Cluster5	0.2716
	1295	CALVIN.PWY..Calvin.Benson.Bassham.cycle	Cluster	Cluster6	-0.000262206	0.000166689	92	50	0.120534	0.248333	Cluster5	0.271988
	1296	PWY.6124..inosine.5..phosphate.biosynthesis.II	Cluster	Cluster4	0.000176141	0.000113074	92	71	0.122959	0.252637	Cluster5	0.276289
	1297	PWY0.1296..purine.ribonucleosides.degradation	Cluster	Cluster3	-0.000119281	7.67811e-05	92	52	0.12393	0.253939	Cluster5	0.278249
	1298	PWY.5659..GDP.mannose.biosynthesis	Cluster	Cluster3	-0.000121106	7.81156e-05	92	47	0.12485	0.255127	Cluster5	0.27942
	1299	PWY66.429..fatty.acid.biosynthesis.initiation..mitochondria.	Cluster	Cluster3	-0.000118617	7.66515e-05	92	56	0.125927	0.256632	Cluster5	0.281608
	1300	BRANCHED.CHAIN.AA.SYN.PWY..superpathway.of.branched.chain.amino.acid.biosynthesis	Cluster	Cluster3	-0.00014235	9.23155e-05	92	44	0.127024	0.257473	Cluster5	0.283385
	1301	PWY.241..C4.photosynthetic.carbon.assimilation.cycle..NADP.ME.type	Cluster	Cluster6	-0.000119975	7.75171e-05	92	48	0.126711	0.257473	Cluster5	0.28291
	1302	PWY.I9..L.cysteine.biosynthesis.VI..from.L.methionine.	Cluster	Cluster2	5.74019e-05	3.73307e-05	92	12	0.127761	0.25827	Cluster5	0.284803
	1303	PWY.6125..superpathway.of.guanosine.nucleotides.de.novo.biosynthesis.II	Cluster	Cluster3	-0.00014919	9.76175e-05	92	58	0.130165	0.262423	Cluster5	0.289243
	1304	GLUCONEO.PWY..gluconeogenesis.I	Cluster	Cluster2	-3.86497e-05	2.53856e-05	92	34	0.132374	0.265454	Cluster5	0.293225
	1305	PWY.7977..L.methionine.biosynthesis.IV	Cluster	Cluster4	-1.67477e-05	1.10168e-05	92	19	0.132088	0.265454	Cluster5	0.292824
	1306	P42.PWY..incomplete.reductive.TCA.cycle	Cluster	Cluster4	-1.37471e-05	9.06348e-06	92	24	0.133195	0.265786	Cluster5	0.294231
	1307	PWY.7228..superpathway.of.guanosine.nucleotides.de.novo.biosynthesis.I	Cluster	Cluster6	-0.000156947	0.00010325	92	63	0.133246	0.265786	Cluster5	0.294231
	1308	PHOSLIPSYN.PWY..superpathway.of.phospholipid.biosynthesis.I..bacteria.	Cluster	Cluster3	-8.63799e-05	5.71099e-05	92	41	0.134066	0.266353	Cluster5	0.295808
	1309	PWY.1042..glycolysis.IV	Cluster	Cluster4	-0.000124262	8.21474e-05	92	73	0.134239	0.266353	Cluster5	0.295813
	1310	PWY.7790..UMP.biosynthesis.II	Cluster	Cluster4	0.000190412	0.000126255	92	87	0.135326	0.267802	Cluster5	0.297188
	1311	PWY.7204..pyridoxal.5..phosphate.salvage.II..plants.	Cluster	Cluster4	-6.86249e-06	4.5981e-06	92	11	0.135753	0.267943	Cluster5	0.297893
	1312	PWY.7791..UMP.biosynthesis.III	Cluster	Cluster4	0.000190204	0.000126401	92	87	0.136188	0.268099	Cluster5	0.298383
	1313	PWY.5384..sucrose.degradation.IV..sucrose.phosphorylase.	Cluster	Cluster2	8.31118e-05	5.53637e-05	92	44	0.136925	0.268846	Cluster5	0.299764
	1314	CALVIN.PWY..Calvin.Benson.Bassham.cycle	Cluster	Cluster4	-9.28032e-05	6.20174e-05	92	50	0.138504	0.270149	Cluster5	0.302513
	1315	PWY.6125..superpathway.of.guanosine.nucleotides.de.novo.biosynthesis.II	Cluster	Cluster6	-0.000125114	8.35477e-05	92	58	0.139026	0.270149	Cluster5	0.302713
	1316	PWY0.1241..ADP.L.glycero..beta..D.manno.heptose.biosynthesis	Cluster	Cluster6	9.35707e-06	6.30414e-06	92	10	0.138937	0.270149	Cluster5	0.302713
	1317	PYRIDOXSYN.PWY..pyridoxal.5..phosphate.biosynthesis.I	Cluster	Cluster6	3.62179e-05	2.41834e-05	92	26	0.138987	0.270149	Cluster5	0.302713
	1318	PWY.6823..molybdopterin.biosynthesis	Cluster	Cluster6	-6.38843e-05	4.26937e-05	92	47	0.139425	0.270226	Cluster5	0.303347
	1319	PWY.6630..superpathway.of.L.tyrosine.biosynthesis	Cluster	Cluster6	-0.000142116	9.53997e-05	92	47	0.141224	0.273009	Cluster5	0.306316
	1320	PWY0.301..L.ascorbate.degradation.I..bacterial..anaerobic.	Cluster	Cluster4	-3.02932e-05	2.06251e-05	92	28	0.14553	0.280613	Cluster5	0.313716
	1321	HISDEG.PWY..L.histidine.degradation.I	Cluster	Cluster6	-0.000115509	7.91324e-05	92	45	0.14885	0.286279	Cluster5	0.319219
	1322	NONOXIPENT.PWY..pentose.phosphate.pathway..non.oxidative.branch..I	Cluster	Cluster3	-0.000238161	0.000164126	92	57	0.150431	0.287822	Cluster5	0.321567
	1323	PWY.5484..glycolysis.II..from.fructose.6.phosphate.	Cluster	Cluster3	-0.00023716	0.000163612	92	52	0.1508	0.287822	Cluster5	0.321868
	1324	PWY.5695..inosine.5..phosphate.degradation	Cluster	Cluster4	-0.000116092	7.99482e-05	92	60	0.150158	0.287822	Cluster5	0.321228
	1325	PWY.6317..D.galactose.degradation.I..Leloir.pathway.	Cluster	Cluster6	-0.00016954	0.000118546	92	73	0.156252	0.297472	Cluster5	0.332494
	1326	PWY.7204..pyridoxal.5..phosphate.salvage.II..plants.	Cluster	Cluster6	1.63082e-05	1.15122e-05	92	11	0.156772	0.297708	Cluster5	0.333095
	1327	POLYAMINSYN3.PWY..superpathway.of.polyamine.biosynthesis.II	Cluster	Cluster2	-4.60571e-06	3.2769e-06	92	14	0.161023	0.304147	Cluster5	0.341096
	1328	PWY.6897..thiamine.diphosphate.salvage.II	Cluster	Cluster3	-0.000180271	0.000127623	92	49	0.161394	0.304147	Cluster5	0.341369
	1329	PWY.7663..gondoate.biosynthesis..anaerobic.	Cluster	Cluster4	-4.97525e-05	3.52032e-05	92	55	0.161153	0.304147	Cluster5	0.341115
	1330	PWY.8178..pentose.phosphate.pathway..non.oxidative.branch..II	Cluster	Cluster3	-0.000198134	0.000140388	92	54	0.16178	0.304147	Cluster5	0.341928
	1331	PWY.6936..seleno.amino.acid.biosynthesis..plants.	Cluster	Cluster6	-0.000121931	8.63064e-05	92	60	0.162553	0.304838	Cluster5	0.342957
	1332	PWY0.862...5Z..dodecenoate.biosynthesis.I	Cluster	Cluster2	-1.33275e-05	9.48578e-06	92	17	0.163598	0.306034	Cluster5	0.344475
	1333	PWY4FS.7..phosphatidylglycerol.biosynthesis.I..plastidic.	Cluster	Cluster4	-5.0197e-05	3.6119e-05	92	46	0.168158	0.313008	Cluster5	0.351968
	1334	PWY4FS.8..phosphatidylglycerol.biosynthesis.II..non.plastidic.	Cluster	Cluster4	-5.01974e-05	3.6119e-05	92	46	0.168155	0.313008	Cluster5	0.351968
	1335	PWY.7851..coenzyme.A.biosynthesis.II..eukaryotic.	Cluster	Cluster3	0.000304302	0.000221015	92	88	0.172675	0.320621	Cluster5	0.360081
	1336	FERMENTATION.PWY..mixed.acid.fermentation	Cluster	Cluster6	6.64797e-05	4.83645e-05	92	29	0.174044	0.322366	Cluster5	0.362666
	1337	PWY0.1297..superpathway.of.purine.deoxyribonucleosides.degradation	Cluster	Cluster4	-2.44869e-05	1.80677e-05	92	37	0.17888	0.330511	Cluster5	0.369456
	1338	PWY.7197..pyrimidine.deoxyribonucleotide.phosphorylation	Cluster	Cluster6	-8.19172e-05	6.06714e-05	92	64	0.181396	0.334338	Cluster5	0.373557
	1339	GLYCOLYSIS.E.D..superpathway.of.glycolysis.and.the.Entner.Doudoroff.pathway	Cluster	Cluster4	-1.26943e-05	9.44275e-06	92	24	0.182334	0.334742	Cluster5	0.374937
	1340	PWY.6608..guanosine.nucleotides.degradation.III	Cluster	Cluster3	-0.000140827	0.000104883	92	50	0.182862	0.334742	Cluster5	0.375657
	1341	UDPNAGSYN.PWY..UDP.N.acetyl.D.glucosamine.biosynthesis.I	Cluster	Cluster3	0.000457904	0.000341072	92	89	0.182951	0.334742	Cluster5	0.375657
	1342	PWY0.1586..peptidoglycan.maturation..meso.diaminopimelate.containing.	Cluster	Cluster4	6.13982e-05	4.57798e-05	92	64	0.183452	0.334844	Cluster5	0.376247
	1343	PWY.6608..guanosine.nucleotides.degradation.III	Cluster	Cluster4	-4.96064e-05	3.70852e-05	92	50	0.184636	0.335377	Cluster5	0.378012
	1344	PWY0.1298..superpathway.of.pyrimidine.deoxyribonucleosides.degradation	Cluster	Cluster3	-5.67771e-05	4.24468e-05	92	43	0.184583	0.335377	Cluster5	0.378012
	1345	PWY0.162..superpathway.of.pyrimidine.ribonucleotides.de.novo.biosynthesis	Cluster	Cluster6	-0.000212106	0.000158636	92	59	0.185836	0.336743	Cluster5	0.380193
	1346	P441.PWY..superpathway.of.N.acetylneuraminate.degradation	Cluster	Cluster4	-1.19281e-05	8.98316e-06	92	22	0.187708	0.339318	Cluster5	0.382629
	1347	PWY.7953..UDP.N.acetylmuramoyl.pentapeptide.biosynthesis.III..meso.diaminopimelate.containing.	Cluster	Cluster4	-0.000146453	0.000110453	92	56	0.188411	0.339773	Cluster5	0.383786
	1348	COLANSYN.PWY..colanic.acid.building.blocks.biosynthesis	Cluster	Cluster3	-8.7698e-05	6.63325e-05	92	41	0.189636	0.34035	Cluster5	0.385443
	1349	PWY.7392..taxadiene.biosynthesis..engineered.	Cluster	Cluster2	-3.27107e-05	2.47421e-05	92	15	0.18962	0.34035	Cluster5	0.385443
	1350	PWY.6606..guanosine.nucleotides.degradation.II	Cluster	Cluster2	2.69178e-05	2.03705e-05	92	12	0.190408	0.340921	Cluster5	0.386452
	1351	PWY.6609..adenine.and.adenosine.salvage.III	Cluster	Cluster6	-0.000409887	0.000310699	92	58	0.192045	0.343035	Cluster5	0.388977
	1352	PWY.3001..superpathway.of.L.isoleucine.biosynthesis.I	Cluster	Cluster3	-0.000127227	9.70594e-05	92	41	0.193851	0.344625	Cluster5	0.391463
	1353	PWY.8004..Entner.Doudoroff.pathway.I	Cluster	Cluster4	-1.02313e-05	7.80884e-06	92	24	0.19357	0.344625	Cluster5	0.391176
	1354	PWY.7220..adenosine.deoxyribonucleotides.de.novo.biosynthesis.II	Cluster	Cluster6	-8.61094e-05	6.62846e-05	92	63	0.198381	0.351017	Cluster5	0.398605
	1355	PWY.7222..guanosine.deoxyribonucleotides.de.novo.biosynthesis.II	Cluster	Cluster6	-8.61094e-05	6.62846e-05	92	63	0.198381	0.351017	Cluster5	0.398605
	1356	PWY.241..C4.photosynthetic.carbon.assimilation.cycle..NADP.ME.type	Cluster	Cluster3	-0.000110427	8.53676e-05	92	48	0.199272	0.351767	Cluster5	0.39954
	1357	PWY.6859..all.trans.farnesol.biosynthesis	Cluster	Cluster2	-1.89047e-05	1.47109e-05	92	16	0.202183	0.356069	Cluster5	0.404222
	1358	PWY0.162..superpathway.of.pyrimidine.ribonucleotides.de.novo.biosynthesis	Cluster	Cluster3	-0.000220441	0.000173842	92	59	0.208193	0.365797	Cluster5	0.414763
	1359	PENTOSE.P.PWY..pentose.phosphate.pathway	Cluster	Cluster3	-0.000196762	0.000156295	92	55	0.211564	0.369444	Cluster5	0.420048
	1360	PWY.6628..superpathway.of.L.phenylalanine.biosynthesis	Cluster	Cluster6	-0.000133329	0.000105691	92	46	0.211742	0.369444	Cluster5	0.420048
	1361	TRNA.CHARGING.PWY..tRNA.charging	Cluster	Cluster3	0.000561633	0.000446392	92	86	0.2117	0.369444	Cluster5	0.420048
	1362	HISDEG.PWY..L.histidine.degradation.I	Cluster	Cluster4	-4.2507e-05	3.38424e-05	92	45	0.212469	0.369853	Cluster5	0.420599
	1363	PWY0.1061..superpathway.of.L.alanine.biosynthesis	Cluster	Cluster6	-0.000239426	0.000190883	92	65	0.214156	0.371929	Cluster5	0.422747
	1364	PWY.6630..superpathway.of.L.tyrosine.biosynthesis	Cluster	Cluster3	-0.000129568	0.000103744	92	47	0.215092	0.372695	Cluster5	0.423466
	1365	PWY.5265..peptidoglycan.biosynthesis.II..staphylococci.	Cluster	Cluster2	-9.46262e-05	7.61226e-05	92	56	0.217191	0.374605	Cluster5	0.426642
	1366	PWY66.429..fatty.acid.biosynthesis.initiation..mitochondria.	Cluster	Cluster6	-8.01827e-05	6.43006e-05	92	56	0.216764	0.374605	Cluster5	0.4261
	1367	PWY.702..L.methionine.biosynthesis.II	Cluster	Cluster4	3.61146e-05	2.93009e-05	92	11	0.221068	0.380419	Cluster5	0.432486
	1368	HISDEG.PWY..L.histidine.degradation.I	Cluster	Cluster3	-0.000115197	9.35936e-05	92	45	0.221893	0.380967	Cluster5	0.433455
	1369	PWY.5188..tetrapyrrole.biosynthesis.I..from.glutamate.	Cluster	Cluster4	-2.56688e-05	2.09891e-05	92	47	0.225066	0.385535	Cluster5	0.438435
	1370	UNINTEGRATED	Cluster	Cluster3	0.0138132	0.011409	92	92	0.229352	0.391094	Cluster5	0.445548
	1371	PWY.6628..superpathway.of.L.phenylalanine.biosynthesis	Cluster	Cluster3	-0.000142682	0.000117837	92	46	0.229241	0.391094	Cluster5	0.445548
	1372	PWY.1269..CMP.3.deoxy.D.manno.octulosonate.biosynthesis	Cluster	Cluster3	-5.33096e-05	4.42117e-05	92	45	0.231272	0.393477	Cluster5	0.448659
	1373	PWY.6609..adenine.and.adenosine.salvage.III	Cluster	Cluster3	-0.000438333	0.000364912	92	58	0.233121	0.394836	Cluster5	0.449454
	1374	PWY0.862...5Z..dodecenoate.biosynthesis.I	Cluster	Cluster4	-9.41904e-06	7.83542e-06	92	17	0.23269	0.394836	Cluster5	0.449454
	1375	GLYCOLYSIS..glycolysis.I..from.glucose.6.phosphate.	Cluster	Cluster6	-0.000248888	0.000207985	92	64	0.235736	0.397993	Cluster5	0.453251
	1376	PWY0.1319..CDP.diacylglycerol.biosynthesis.II	Cluster	Cluster3	-0.000232917	0.000195207	92	78	0.236044	0.397993	Cluster5	0.453429
	1377	COLANSYN.PWY..colanic.acid.building.blocks.biosynthesis	Cluster	Cluster6	-7.24664e-05	6.07176e-05	92	41	0.236923	0.398581	Cluster5	0.454413
	1378	PHOSLIPSYN.PWY..superpathway.of.phospholipid.biosynthesis.I..bacteria.	Cluster	Cluster6	-6.22502e-05	5.23456e-05	92	41	0.238596	0.4005	Cluster5	0.456564
	1379	PWY.5667..CDP.diacylglycerol.biosynthesis.I	Cluster	Cluster3	-0.00023161	0.000195649	92	77	0.239714	0.401481	Cluster5	0.45808
	1380	PWY.5130..2.oxobutanoate.degradation.I	Cluster	Cluster2	-1.10497e-05	9.38842e-06	92	24	0.242447	0.404469	Cluster5	0.461038
	1381	PWY66.429..fatty.acid.biosynthesis.initiation..mitochondria.	Cluster	Cluster4	-3.29337e-05	2.79897e-05	92	56	0.242574	0.404469	Cluster5	0.461038
	1382	PWY0.1061..superpathway.of.L.alanine.biosynthesis	Cluster	Cluster3	-0.000257385	0.00022087	92	65	0.247114	0.411127	Cluster5	0.466826
	1383	NAGLIPASYN.PWY..lipid.IVA.biosynthesis..E..coli.	Cluster	Cluster3	-0.000104437	8.98433e-05	92	42	0.24825	0.411198	Cluster5	0.467918
	1384	PWY.8073..lipid.IVA.biosynthesis..P..putida.	Cluster	Cluster3	-0.000104437	8.98433e-05	92	42	0.24825	0.411198	Cluster5	0.467918
	1385	PWY.5189..tetrapyrrole.biosynthesis.II..from.glycine.	Cluster	Cluster3	-5.69807e-05	4.90689e-05	92	45	0.248937	0.41143	Cluster5	0.468695
	1386	PWY.3001..superpathway.of.L.isoleucine.biosynthesis.I	Cluster	Cluster4	-4.11096e-05	3.54671e-05	92	41	0.249616	0.411648	Cluster5	0.46966
	1387	PWY.7115..C4.photosynthetic.carbon.assimilation.cycle..NAD.ME.type	Cluster	Cluster6	2.52943e-05	2.18531e-05	92	40	0.250249	0.411789	Cluster5	0.470535
	1388	GLYCOLYSIS.E.D..superpathway.of.glycolysis.and.the.Entner.Doudoroff.pathway	Cluster	Cluster3	-2.9428e-05	2.54652e-05	92	24	0.251002	0.412125	Cluster5	0.471635
	1389	PWY.5973..cis.vaccenate.biosynthesis	Cluster	Cluster4	-4.80962e-05	4.184e-05	92	58	0.253504	0.414671	Cluster5	0.475667
	1390	PWY66.399..gluconeogenesis.III	Cluster	Cluster6	-2.74128e-05	2.38096e-05	92	16	0.253655	0.414671	Cluster5	0.475667
	1391	PWY.5030..L.histidine.degradation.III	Cluster	Cluster6	-8.33246e-05	7.27543e-05	92	42	0.256163	0.416058	Cluster5	0.478138
	1392	PWY0.1297..superpathway.of.purine.deoxyribonucleosides.degradation	Cluster	Cluster3	-5.80097e-05	5.07248e-05	92	37	0.255951	0.416058	Cluster5	0.478138
	1393	SER.GLYSYN.PWY..superpathway.of.L.serine.and.glycine.biosynthesis.I	Cluster	Cluster3	-9.0637e-05	7.92358e-05	92	55	0.256107	0.416058	Cluster5	0.478138
	1394	PWY.8004..Entner.Doudoroff.pathway.I	Cluster	Cluster3	-2.39875e-05	2.10589e-05	92	24	0.257801	0.417815	Cluster5	0.480556
	1395	P441.PWY..superpathway.of.N.acetylneuraminate.degradation	Cluster	Cluster3	-2.71152e-05	2.42258e-05	92	22	0.266105	0.427588	Cluster5	0.492768
	1396	PANTOSYN.PWY..superpathway.of.coenzyme.A.biosynthesis.I..bacteria.	Cluster	Cluster4	-6.80991e-05	6.06472e-05	92	55	0.264677	0.427588	Cluster5	0.491726
	1397	PWY.5188..tetrapyrrole.biosynthesis.I..from.glutamate.	Cluster	Cluster3	-6.80121e-05	6.06424e-05	92	47	0.265348	0.427588	Cluster5	0.492339
	1398	PWY.5367..petroselinate.biosynthesis	Cluster	Cluster2	3.60838e-05	3.22025e-05	92	32	0.265573	0.427588	Cluster5	0.49243
	1399	NAGLIPASYN.PWY..lipid.IVA.biosynthesis..E..coli.	Cluster	Cluster4	-3.55301e-05	3.19125e-05	92	42	0.26867	0.428691	Cluster5	0.496535
	1400	PWY.7208..superpathway.of.pyrimidine.nucleobases.salvage	Cluster	Cluster6	-0.000129471	0.000116159	92	68	0.269072	0.428691	Cluster5	0.496953
	1401	PWY.7282..4.amino.2.methyl.5.diphosphomethylpyrimidine.biosynthesis.II	Cluster	Cluster3	-6.02621e-05	5.40962e-05	92	32	0.268362	0.428691	Cluster5	0.496535
	1402	PWY.8073..lipid.IVA.biosynthesis..P..putida.	Cluster	Cluster4	-3.55301e-05	3.19125e-05	92	42	0.26867	0.428691	Cluster5	0.496535
	1403	PWY0.1298..superpathway.of.pyrimidine.deoxyribonucleosides.degradation	Cluster	Cluster4	-1.6863e-05	1.51821e-05	92	43	0.269773	0.428899	Cluster5	0.497656
	1404	ASPASN.PWY..superpathway.of.L.aspartate.and.L.asparagine.biosynthesis	Cluster	Cluster6	-8.94686e-05	8.05102e-05	92	61	0.270592	0.429293	Cluster5	0.498449
	1405	PWY.2941..L.lysine.biosynthesis.II	Cluster	Cluster3	-0.000109877	9.9473e-05	92	47	0.272392	0.431239	Cluster5	0.501436
	1406	PWY.6936..seleno.amino.acid.biosynthesis..plants.	Cluster	Cluster4	-4.00429e-05	3.63362e-05	92	60	0.273505	0.432092	Cluster5	0.503156
	1407	X1CMET2.PWY..folate.transformations.III..E..coli.	Cluster	Cluster3	-4.54638e-05	4.13666e-05	92	20	0.275494	0.433413	Cluster5	0.505162
	1408	P41.PWY..pyruvate.fermentation.to.acetate.and..S..lactate.I	Cluster	Cluster3	0.000342677	0.00031204	92	87	0.275486	0.433413	Cluster5	0.505162
	1409	PWY.5100..pyruvate.fermentation.to.acetate.and.lactate.II	Cluster	Cluster3	0.000341848	0.000312142	92	88	0.276788	0.43454	Cluster5	0.506874
	1410	PWY.6317..D.galactose.degradation.I..Leloir.pathway.	Cluster	Cluster4	-5.72968e-05	5.25399e-05	92	73	0.278487	0.436296	Cluster5	0.508659
	1411	PWY.7221..guanosine.ribonucleotides.de.novo.biosynthesis	Cluster	Cluster3	0.000486527	0.000446871	92	83	0.279335	0.436715	Cluster5	0.509547
	1412	PEPTIDOGLYCANSYN.PWY..peptidoglycan.biosynthesis.I..meso.diaminopimelate.containing.	Cluster	Cluster3	0.000343399	0.000319461	92	88	0.285392	0.445259	Cluster5	0.518241
	1413	PWY.6901..superpathway.of.glucose.and.xylose.degradation	Cluster	Cluster4	-1.84431e-05	1.72444e-05	92	31	0.28788	0.44821	Cluster5	0.522421
	1414	PWY.7383..anaerobic.energy.metabolism..invertebrates..cytosol.	Cluster	Cluster6	-3.89994e-05	3.64711e-05	92	25	0.288758	0.448649	Cluster5	0.523676
	1415	PWY.841..superpathway.of.purine.nucleotides.de.novo.biosynthesis.I	Cluster	Cluster4	-4.54169e-05	4.26329e-05	92	54	0.289917	0.449521	Cluster5	0.525102
	1416	PWY.5005..biotin.biosynthesis.II	Cluster	Cluster6	-1.79599e-05	1.68604e-05	92	25	0.291044	0.45034	Cluster5	0.526464
	1417	PWY0.845..superpathway.of.pyridoxal.5..phosphate.biosynthesis.and.salvage	Cluster	Cluster6	3.0998e-05	2.91928e-05	92	25	0.292165	0.451146	Cluster5	0.528151
	1418	PWY.7117..C4.photosynthetic.carbon.assimilation.cycle..PEPCK.type	Cluster	Cluster3	-8.75779e-05	8.28375e-05	92	42	0.293382	0.452097	Cluster5	0.530011
	1419	PWY.6901..superpathway.of.glucose.and.xylose.degradation	Cluster	Cluster3	-5.11347e-05	4.87868e-05	92	31	0.297484	0.45748	Cluster5	0.536387
	1420	ILEUSYN.PWY..L.isoleucine.biosynthesis.I..from.threonine.	Cluster	Cluster6	-8.60529e-05	8.38372e-05	92	49	0.308618	0.47267	Cluster5	0.552917
	1421	PWY.6147..6.hydroxymethyl.dihydropterin.diphosphate.biosynthesis.I	Cluster	Cluster6	-0.000194518	0.000189357	92	75	0.30805	0.47267	Cluster5	0.55225
	1422	PENTOSE.P.PWY..pentose.phosphate.pathway	Cluster	Cluster6	-0.000152068	0.000148632	92	55	0.309928	0.473474	Cluster5	0.55442
	1423	PWY.621..sucrose.degradation.III..sucrose.invertase.	Cluster	Cluster2	-1.98898e-05	1.95617e-05	92	29	0.312081	0.473474	Cluster5	0.556991
	1424	PWY.7199..pyrimidine.deoxyribonucleosides.salvage	Cluster	Cluster6	-0.000300398	0.000293783	92	66	0.310662	0.473474	Cluster5	0.555162
	1425	PWY.7220..adenosine.deoxyribonucleotides.de.novo.biosynthesis.II	Cluster	Cluster4	-2.82499e-05	2.78319e-05	92	63	0.312921	0.473474	Cluster5	0.557781
	1426	PWY.7222..guanosine.deoxyribonucleotides.de.novo.biosynthesis.II	Cluster	Cluster4	-2.82499e-05	2.78319e-05	92	63	0.312921	0.473474	Cluster5	0.557781
	1427	PWY.7356..thiamine.diphosphate.salvage.IV..yeast.	Cluster	Cluster6	-6.13797e-05	6.02803e-05	92	21	0.312082	0.473474	Cluster5	0.556991
	1428	PWY0.162..superpathway.of.pyrimidine.ribonucleotides.de.novo.biosynthesis	Cluster	Cluster4	6.16745e-05	6.08831e-05	92	59	0.314047	0.474223	Cluster5	0.559206
	1429	PWY.6387..UDP.N.acetylmuramoyl.pentapeptide.biosynthesis.I..meso.diaminopimelate.containing.	Cluster	Cluster3	0.00033159	0.000328135	92	89	0.315055	0.474792	Cluster5	0.560164
	1430	PWY.6386..UDP.N.acetylmuramoyl.pentapeptide.biosynthesis.II..lysine.containing.	Cluster	Cluster3	0.000324168	0.000321393	92	88	0.315973	0.475224	Cluster5	0.560733
	1431	PWY.6147..6.hydroxymethyl.dihydropterin.diphosphate.biosynthesis.I	Cluster	Cluster3	-0.000226638	0.0002264	92	75	0.320395	0.476161	Cluster5	0.565723
	1432	PWY.6527..stachyose.degradation	Cluster	Cluster3	-0.000107176	0.000107192	92	58	0.320154	0.476161	Cluster5	0.565679
	1433	PWY.6588..pyruvate.fermentation.to.acetone	Cluster	Cluster3	-1.33848e-05	1.33903e-05	92	21	0.317855	0.476161	Cluster5	0.563361
	1434	PWY.7977..L.methionine.biosynthesis.IV	Cluster	Cluster6	2.49389e-05	2.48573e-05	92	19	0.318505	0.476161	Cluster5	0.563802
	1435	PWY.7977..L.methionine.biosynthesis.IV	Cluster	Cluster3	-2.98084e-05	2.97101e-05	92	19	0.318495	0.476161	Cluster5	0.563802
	1436	PWY.I9..L.cysteine.biosynthesis.VI..from.L.methionine.	Cluster	Cluster4	3.21157e-05	3.21214e-05	92	12	0.320169	0.476161	Cluster5	0.565679
	1437	PWY.7323..superpathway.of.GDP.mannose.derived.O.antigen.building.blocks.biosynthesis	Cluster	Cluster4	-1.12458e-05	1.12965e-05	92	27	0.322293	0.478036	Cluster5	0.568717
	1438	ARGSYN.PWY..L.arginine.biosynthesis.I..via.L.ornithine.	Cluster	Cluster3	-6.56839e-05	6.65976e-05	92	22	0.327046	0.483331	Cluster5	0.574759
	1439	PWY.702..L.methionine.biosynthesis.II	Cluster	Cluster2	3.35564e-05	3.40528e-05	92	11	0.327148	0.483331	Cluster5	0.574759
	1440	PWY0.1296..purine.ribonucleosides.degradation	Cluster	Cluster6	-6.69687e-05	6.83132e-05	92	52	0.330631	0.487518	Cluster5	0.579428
	1441	PWY4LZ.257..superpathway.of.fermentation..Chlamydomonas.reinhardtii.	Cluster	Cluster3	-2.4272e-05	2.49475e-05	92	15	0.333863	0.491321	Cluster5	0.583637
	1442	POLYAMINSYN3.PWY..superpathway.of.polyamine.biosynthesis.II	Cluster	Cluster6	-6.1152e-06	6.36175e-06	92	14	0.337291	0.493564	Cluster5	0.586825
	1443	PWY.5030..L.histidine.degradation.III	Cluster	Cluster3	-7.78818e-05	8.07283e-05	92	42	0.337356	0.493564	Cluster5	0.586825
	1444	PWY.6703..preQ0.biosynthesis	Cluster	Cluster4	-3.84501e-05	3.97987e-05	92	54	0.336715	0.493564	Cluster5	0.58667
	1445	NAGLIPASYN.PWY..lipid.IVA.biosynthesis..E..coli.	Cluster	Cluster6	-7.5298e-05	7.82924e-05	92	42	0.339591	0.494908	Cluster5	0.589254
	1446	PWY.8073..lipid.IVA.biosynthesis..P..putida.	Cluster	Cluster6	-7.5298e-05	7.82924e-05	92	42	0.339591	0.494908	Cluster5	0.589254
	1447	PWY.7197..pyrimidine.deoxyribonucleotide.phosphorylation	Cluster	Cluster4	-2.50319e-05	2.61415e-05	92	64	0.340943	0.495444	Cluster5	0.590104
	1448	PWY66.409..superpathway.of.purine.nucleotide.salvage	Cluster	Cluster3	-6.99609e-05	7.31025e-05	92	32	0.341277	0.495444	Cluster5	0.590104
	1449	PWY.5030..L.histidine.degradation.III	Cluster	Cluster4	-2.70107e-05	2.83603e-05	92	42	0.343646	0.49707	Cluster5	0.59203
	1450	PWY0.301..L.ascorbate.degradation.I..bacterial..anaerobic.	Cluster	Cluster3	-5.49091e-05	5.76695e-05	92	28	0.343719	0.49707	Cluster5	0.59203
	1451	PWY.7115..C4.photosynthetic.carbon.assimilation.cycle..NAD.ME.type	Cluster	Cluster4	9.19754e-06	9.68537e-06	92	40	0.34493	0.497864	Cluster5	0.593752
	1452	VALSYN.PWY..L.valine.biosynthesis	Cluster	Cluster6	-8.60511e-05	9.07656e-05	92	53	0.346756	0.499541	Cluster5	0.59653
	1453	ARGSYNBSUB.PWY..L.arginine.biosynthesis.II..acetyl.cycle.	Cluster	Cluster3	-5.99539e-05	6.41499e-05	92	24	0.35292	0.507449	Cluster5	0.605652
	1454	PWY0.1586..peptidoglycan.maturation..meso.diaminopimelate.containing.	Cluster	Cluster6	0.000105878	0.000113476	92	64	0.354286	0.508441	Cluster5	0.606515
	1455	PWY.6305..superpathway.of.putrescine.biosynthesis	Cluster	Cluster4	-3.22739e-06	3.5004e-06	92	31	0.356863	0.511164	Cluster5	0.610183
	1456	GLUCONEO.PWY..gluconeogenesis.I	Cluster	Cluster3	-5.40583e-05	5.8929e-05	92	34	0.3622	0.517823	Cluster5	0.616684
	1457	PWY.5676..acetyl.CoA.fermentation.to.butanoate.II	Cluster	Cluster3	-1.77061e-05	1.93798e-05	92	13	0.363804	0.519128	Cluster5	0.618664
	1458	P124.PWY..Bifidobacterium.shunt	Cluster	Cluster3	-0.000210477	0.000231268	92	55	0.365386	0.520398	Cluster5	0.62098
	1459	PWY.702..L.methionine.biosynthesis.II	Cluster	Cluster6	5.95438e-05	6.61118e-05	92	11	0.370259	0.526342	Cluster5	0.626987
	1460	PWY.7115..C4.photosynthetic.carbon.assimilation.cycle..NAD.ME.type	Cluster	Cluster3	-2.34009e-05	2.61195e-05	92	40	0.37277	0.528912	Cluster5	0.63048
	1461	PWY.241..C4.photosynthetic.carbon.assimilation.cycle..NADP.ME.type	Cluster	Cluster4	-2.66616e-05	2.99326e-05	92	48	0.375701	0.532066	Cluster5	0.633218
	1462	PWY.5121..superpathway.of.geranylgeranyl.diphosphate.biosynthesis.II..via.MEP.	Cluster	Cluster6	-5.34221e-05	6.00773e-05	92	23	0.37715	0.533114	Cluster5	0.635212
	1463	PWY.7356..thiamine.diphosphate.salvage.IV..yeast.	Cluster	Cluster4	-2.32543e-05	2.6288e-05	92	21	0.378831	0.534486	Cluster5	0.637661
	1464	P441.PWY..superpathway.of.N.acetylneuraminate.degradation	Cluster	Cluster6	1.7804e-05	2.02687e-05	92	22	0.382147	0.537674	Cluster5	0.642858
	1465	PWY.3001..superpathway.of.L.isoleucine.biosynthesis.I	Cluster	Cluster6	-7.15341e-05	8.13897e-05	92	41	0.382521	0.537674	Cluster5	0.643101
	1466	POLYAMSYN.PWY..superpathway.of.polyamine.biosynthesis.I	Cluster	Cluster2	-4.32016e-06	4.96613e-06	92	12	0.384507	0.539458	Cluster5	0.645669
	1467	PWY.5918..superpathway.of.heme.b.biosynthesis.from.glutamate	Cluster	Cluster4	-1.35865e-05	1.5697e-05	92	29	0.38925	0.545095	Cluster5	0.652075
	1468	P42.PWY..incomplete.reductive.TCA.cycle	Cluster	Cluster3	-2.21587e-05	2.58309e-05	92	24	0.393354	0.548798	Cluster5	0.656602
	1469	PWY.6125..superpathway.of.guanosine.nucleotides.de.novo.biosynthesis.II	Cluster	Cluster4	-3.00339e-05	3.4983e-05	92	58	0.392971	0.548798	Cluster5	0.656353
	1470	P164.PWY..purine.nucleobases.degradation.I..anaerobic.	Cluster	Cluster2	-3.13832e-05	3.67057e-05	92	44	0.394918	0.54996	Cluster5	0.658431
	1471	GLUCOSE1PMETAB.PWY..glucose.and.glucose.1.phosphate.degradation	Cluster	Cluster3	-0.000227885	0.000266925	92	22	0.395777	0.550138	Cluster5	0.659143
	1472	GLYCOCAT.PWY..glycogen.degradation.I	Cluster	Cluster4	2.18548e-05	2.56979e-05	92	10	0.397439	0.551428	Cluster5	0.661065
	1473	POLYAMINSYN3.PWY..superpathway.of.polyamine.biosynthesis.II	Cluster	Cluster4	-2.37921e-06	2.81455e-06	92	14	0.398679	0.55213	Cluster5	0.662736
	1474	P124.PWY..Bifidobacterium.shunt	Cluster	Cluster6	-0.000185556	0.000220258	92	55	0.402515	0.556417	Cluster5	0.668322
	1475	PWY.5913..partial.TCA.cycle..obligate.autotrophs.	Cluster	Cluster4	-2.11202e-05	2.51632e-05	92	28	0.403679	0.557003	Cluster5	0.669464
	1476	GLUTORN.PWY..L.ornithine.biosynthesis.I	Cluster	Cluster3	-3.86077e-05	4.61736e-05	92	23	0.405751	0.558837	Cluster5	0.672504
	1477	PWY.6122..5.aminoimidazole.ribonucleotide.biosynthesis.II	Cluster	Cluster4	0.000111248	0.000133696	92	73	0.407637	0.559385	Cluster5	0.67389
	1478	PWY.6277..superpathway.of.5.aminoimidazole.ribonucleotide.biosynthesis	Cluster	Cluster4	0.000111248	0.000133696	92	73	0.407637	0.559385	Cluster5	0.67389
	1479	P164.PWY..purine.nucleobases.degradation.I..anaerobic.	Cluster	Cluster6	-6.181e-05	7.42732e-05	92	44	0.408433	0.559456	Cluster5	0.67389
	1480	PWY.7383..anaerobic.energy.metabolism..invertebrates..cytosol.	Cluster	Cluster3	-3.56676e-05	4.30764e-05	92	25	0.410072	0.56068	Cluster5	0.675286
	1481	PWY.5005..biotin.biosynthesis.II	Cluster	Cluster3	-1.52597e-05	1.85281e-05	92	25	0.412441	0.561395	Cluster5	0.678245
	1482	PWY.7323..superpathway.of.GDP.mannose.derived.O.antigen.building.blocks.biosynthesis	Cluster	Cluster3	-2.61641e-05	3.17956e-05	92	27	0.412834	0.561395	Cluster5	0.678245
	1483	PWY66.399..gluconeogenesis.III	Cluster	Cluster3	-2.28318e-05	2.76803e-05	92	16	0.411757	0.561395	Cluster5	0.677663
	1484	PWY.5989..stearate.biosynthesis.II..bacteria.and.plants.	Cluster	Cluster6	2.49871e-05	3.0612e-05	92	33	0.417468	0.56379	Cluster5	0.682475
	1485	PWY.5989..stearate.biosynthesis.II..bacteria.and.plants.	Cluster	Cluster3	-2.95563e-05	3.62179e-05	92	33	0.416901	0.56379	Cluster5	0.682475
	1486	PWY.7356..thiamine.diphosphate.salvage.IV..yeast.	Cluster	Cluster3	-5.86013e-05	7.19036e-05	92	21	0.417594	0.56379	Cluster5	0.682475
	1487	PWY66.409..superpathway.of.purine.nucleotide.salvage	Cluster	Cluster6	-5.57856e-05	6.83825e-05	92	32	0.417547	0.56379	Cluster5	0.682475
	1488	PWY4FS.7..phosphatidylglycerol.biosynthesis.I..plastidic.	Cluster	Cluster3	-8.15888e-05	0.000100659	92	46	0.419915	0.564897	Cluster5	0.684679
	1489	PWY4FS.8..phosphatidylglycerol.biosynthesis.II..non.plastidic.	Cluster	Cluster3	-8.15885e-05	0.000100659	92	46	0.419917	0.564897	Cluster5	0.684679
	1490	PWY0.1319..CDP.diacylglycerol.biosynthesis.II	Cluster	Cluster6	-0.000132106	0.000163322	92	78	0.420797	0.565071	Cluster5	0.685299
	1491	PWY.5913..partial.TCA.cycle..obligate.autotrophs.	Cluster	Cluster6	5.10782e-05	6.33212e-05	92	28	0.422881	0.566857	Cluster5	0.686804
	1492	POLYAMINSYN3.PWY..superpathway.of.polyamine.biosynthesis.II	Cluster	Cluster3	-6.06214e-06	7.60588e-06	92	14	0.426133	0.567665	Cluster5	0.689817
	1493	PWY.5103..L.isoleucine.biosynthesis.III	Cluster	Cluster6	-6.11903e-05	7.64524e-05	92	49	0.426504	0.567665	Cluster5	0.689817
	1494	PWY.5667..CDP.diacylglycerol.biosynthesis.I	Cluster	Cluster6	-0.0001308	0.000163691	92	77	0.426431	0.567665	Cluster5	0.689817
	1495	PWY.8178..pentose.phosphate.pathway..non.oxidative.branch..II	Cluster	Cluster6	-0.000104239	0.000130006	92	54	0.425569	0.567665	Cluster5	0.689495
	1496	PWY0.301..L.ascorbate.degradation.I..bacterial..anaerobic.	Cluster	Cluster6	-3.90533e-05	4.95325e-05	92	28	0.433229	0.575597	Cluster5	0.698283
	1497	FASYN.ELONG.PWY..fatty.acid.elongation....saturated	Cluster	Cluster3	-1.94486e-05	2.48385e-05	92	14	0.436155	0.577445	Cluster5	0.701391
	1498	PWY0.845..superpathway.of.pyridoxal.5..phosphate.biosynthesis.and.salvage	Cluster	Cluster4	-9.0775e-06	1.15965e-05	92	25	0.435956	0.577445	Cluster5	0.701391
	1499	PWY.7664..oleate.biosynthesis.IV..anaerobic.	Cluster	Cluster3	-1.83746e-05	2.37137e-05	92	14	0.440884	0.58268	Cluster5	0.706974
	1500	COMPLETE.ARO.PWY..superpathway.of.aromatic.amino.acid.biosynthesis	Cluster	Cluster4	-4.96e-05	6.4243e-05	92	55	0.442261	0.582868	Cluster5	0.707868
	1501	PWY.6282..palmitoleate.biosynthesis.I..from..5Z..dodec.5.enoate.	Cluster	Cluster3	-1.73791e-05	2.25146e-05	92	14	0.442576	0.582868	Cluster5	0.707868
	1502	FERMENTATION.PWY..mixed.acid.fermentation	Cluster	Cluster3	-4.3033e-05	5.58834e-05	92	29	0.443381	0.582906	Cluster5	0.708149
	1503	PWY.5918..superpathway.of.heme.b.biosynthesis.from.glutamate	Cluster	Cluster3	-3.41599e-05	4.4765e-05	92	29	0.447483	0.586673	Cluster5	0.712549
	1504	PWY4LZ.257..superpathway.of.fermentation..Chlamydomonas.reinhardtii.	Cluster	Cluster6	1.59277e-05	2.08716e-05	92	15	0.447807	0.586673	Cluster5	0.712549
	1505	HISTSYN.PWY..L.histidine.biosynthesis	Cluster	Cluster3	-3.80974e-05	5.04828e-05	92	13	0.45278	0.592147	Cluster5	0.718265
	1506	PWY.6969..TCA.cycle.V..2.oxoglutarate.synthase.	Cluster	Cluster3	-3.55419e-05	4.72029e-05	92	31	0.45356	0.592147	Cluster5	0.719095
	1507	NONOXIPENT.PWY..pentose.phosphate.pathway..non.oxidative.branch..I	Cluster	Cluster6	-0.000113956	0.000152551	92	57	0.457729	0.594495	Cluster5	0.723259
	1508	PPGPPMET.PWY..ppGpp.metabolism	Cluster	Cluster3	-1.66575e-05	2.22935e-05	92	26	0.456992	0.594495	Cluster5	0.723259
	1509	PWY.7228..superpathway.of.guanosine.nucleotides.de.novo.biosynthesis.I	Cluster	Cluster4	-3.21781e-05	4.31231e-05	92	63	0.457575	0.594495	Cluster5	0.723259
	1510	HEME.BIOSYNTHESIS.II..heme.b.biosynthesis.I..aerobic.	Cluster	Cluster3	-2.36626e-05	3.20035e-05	92	33	0.461671	0.598352	Cluster5	0.727443
	1511	PWY.6606..guanosine.nucleotides.degradation.II	Cluster	Cluster6	2.91871e-05	3.95577e-05	92	12	0.463007	0.598352	Cluster5	0.728448
	1512	PWY.922..mevalonate.pathway.I..eukaryotes.and.bacteria.	Cluster	Cluster4	5.22487e-05	7.08907e-05	92	50	0.463086	0.598352	Cluster5	0.728448
	1513	PWY.5913..partial.TCA.cycle..obligate.autotrophs.	Cluster	Cluster3	-5.13867e-05	7.13193e-05	92	28	0.473139	0.610292	Cluster5	0.739295
	1514	PWY0.1298..superpathway.of.pyrimidine.deoxyribonucleosides.degradation	Cluster	Cluster6	-2.62229e-05	3.64518e-05	92	43	0.474424	0.610903	Cluster5	0.740481
	1515	PWY.8004..Entner.Doudoroff.pathway.I	Cluster	Cluster6	1.2554e-05	1.76191e-05	92	24	0.478048	0.614516	Cluster5	0.744896
	1516	HEMESYN2.PWY..heme.b.biosynthesis.II..oxygen.independent.	Cluster	Cluster6	2.52583e-05	3.55356e-05	92	32	0.479746	0.615646	Cluster5	0.747127
	1517	GLUTORN.PWY..L.ornithine.biosynthesis.I	Cluster	Cluster6	2.72685e-05	3.86378e-05	92	23	0.482652	0.616725	Cluster5	0.750406
	1518	LACTOSECAT.PWY..lactose.and.galactose.degradation.I	Cluster	Cluster6	-0.000153725	0.000218226	92	61	0.483613	0.616725	Cluster5	0.750572
	1519	PWY.7198..pyrimidine.deoxyribonucleotides.de.novo.biosynthesis.IV	Cluster	Cluster4	-2.1227e-05	3.01898e-05	92	57	0.483867	0.616725	Cluster5	0.750572
	1520	PWY0.845..superpathway.of.pyridoxal.5..phosphate.biosynthesis.and.salvage	Cluster	Cluster3	-2.31578e-05	3.28707e-05	92	25	0.482995	0.616725	Cluster5	0.750525
	1521	P42.PWY..incomplete.reductive.TCA.cycle	Cluster	Cluster6	-1.63357e-05	2.33897e-05	92	24	0.487527	0.620339	Cluster5	0.753402
	1522	PWY.4041...gamma..glutamyl.cycle	Cluster	Cluster6	3.45738e-05	4.97139e-05	92	46	0.489028	0.621197	Cluster5	0.755306
	1523	PWY.6126..superpathway.of.adenosine.nucleotides.de.novo.biosynthesis.II	Cluster	Cluster4	-3.53605e-05	5.10445e-05	92	63	0.490332	0.621803	Cluster5	0.756904
	1524	P161.PWY..acetylene.degradation..anaerobic.	Cluster	Cluster2	2.36319e-05	3.42889e-05	92	46	0.492981	0.623062	Cluster5	0.75808
	1525	PWY.7392..taxadiene.biosynthesis..engineered.	Cluster	Cluster6	-3.58433e-05	5.18966e-05	92	15	0.492221	0.623062	Cluster5	0.757748
	1526	FERMENTATION.PWY..mixed.acid.fermentation	Cluster	Cluster4	-1.365e-05	1.99098e-05	92	29	0.494819	0.62418	Cluster5	0.75966
	1527	SER.GLYSYN.PWY..superpathway.of.L.serine.and.glycine.biosynthesis.I	Cluster	Cluster6	-5.40484e-05	7.88808e-05	92	55	0.495526	0.62418	Cluster5	0.760329
	1528	PWY.6859..all.trans.farnesol.biosynthesis	Cluster	Cluster6	-2.0941e-05	3.08684e-05	92	16	0.499936	0.628682	Cluster5	0.764176
	1529	PWY.5121..superpathway.of.geranylgeranyl.diphosphate.biosynthesis.II..via.MEP.	Cluster	Cluster4	-1.58346e-05	2.36819e-05	92	23	0.505571	0.634707	Cluster5	0.769443
	1530	GLYCOLYSIS.E.D..superpathway.of.glycolysis.and.the.Entner.Doudoroff.pathway	Cluster	Cluster6	1.40349e-05	2.13057e-05	92	24	0.511802	0.638063	Cluster5	0.775674
	1531	HEMESYN2.PWY..heme.b.biosynthesis.II..oxygen.independent.	Cluster	Cluster3	-2.58929e-05	3.93126e-05	92	32	0.511873	0.638063	Cluster5	0.775674
	1532	PWY.5188..tetrapyrrole.biosynthesis.I..from.glutamate.	Cluster	Cluster6	-3.91536e-05	5.91649e-05	92	47	0.510328	0.638063	Cluster5	0.774586
	1533	PWY.5189..tetrapyrrole.biosynthesis.II..from.glycine.	Cluster	Cluster6	-3.16139e-05	4.80177e-05	92	45	0.512486	0.638063	Cluster5	0.775767
	1534	PWY.I9..L.cysteine.biosynthesis.VI..from.L.methionine.	Cluster	Cluster6	4.78368e-05	7.24757e-05	92	12	0.510972	0.638063	Cluster5	0.775145
	1535	PWY.7357..thiamine.phosphate.formation.from.pyrithiamine.and.oxythiamine..yeast.	Cluster	Cluster4	4.86259e-05	7.45316e-05	92	56	0.515851	0.64119	Cluster5	0.779181
	1536	UDPNAGSYN.PWY..UDP.N.acetyl.D.glucosamine.biosynthesis.I	Cluster	Cluster4	7.87156e-05	0.000121358	92	89	0.518328	0.643206	Cluster5	0.781244
	1537	PWY.6897..thiamine.diphosphate.salvage.II	Cluster	Cluster4	-2.93483e-05	4.546e-05	92	49	0.520268	0.64455	Cluster5	0.783748
	1538	PWY.5121..superpathway.of.geranylgeranyl.diphosphate.biosynthesis.II..via.MEP.	Cluster	Cluster3	-4.30693e-05	6.72474e-05	92	23	0.523557	0.647558	Cluster5	0.787016
	1539	PWY.7220..adenosine.deoxyribonucleotides.de.novo.biosynthesis.II	Cluster	Cluster3	-4.94386e-05	7.75808e-05	92	63	0.525685	0.648058	Cluster5	0.788949
	1540	PWY.7222..guanosine.deoxyribonucleotides.de.novo.biosynthesis.II	Cluster	Cluster3	-4.94386e-05	7.75808e-05	92	63	0.525685	0.648058	Cluster5	0.788949
	1541	BRANCHED.CHAIN.AA.SYN.PWY..superpathway.of.branched.chain.amino.acid.biosynthesis	Cluster	Cluster6	-4.94693e-05	7.78714e-05	92	44	0.527439	0.649156	Cluster5	0.790646
	1542	POLYISOPRENSYN.PWY..polyisoprenoid.biosynthesis..E..coli.	Cluster	Cluster3	-3.61858e-05	5.72674e-05	92	30	0.529159	0.650208	Cluster5	0.792047
	1543	PWY.7204..pyridoxal.5..phosphate.salvage.II..plants.	Cluster	Cluster3	-8.17529e-06	1.30161e-05	92	11	0.530024	0.650209	Cluster5	0.792498
	1544	PWY.6305..superpathway.of.putrescine.biosynthesis	Cluster	Cluster3	-6.35023e-06	1.01293e-05	92	31	0.530931	0.650261	Cluster5	0.793433
	1545	PWY.6527..stachyose.degradation	Cluster	Cluster4	-2.48027e-05	3.97478e-05	92	58	0.53426	0.652213	Cluster5	0.796291
	1546	PWY.7117..C4.photosynthetic.carbon.assimilation.cycle..PEPCK.type	Cluster	Cluster6	4.4947e-05	7.1742e-05	92	42	0.53347	0.652213	Cluster5	0.795767
	1547	PENTOSE.P.PWY..pentose.phosphate.pathway	Cluster	Cluster4	-3.33394e-05	5.43002e-05	92	55	0.540994	0.659364	Cluster5	0.802923
	1548	THRESYN.PWY..superpathway.of.L.threonine.biosynthesis	Cluster	Cluster4	4.2849e-05	7.0342e-05	92	70	0.544011	0.661968	Cluster5	0.806123
	1549	PWY0.1477..ethanolamine.utilization	Cluster	Cluster2	2.11756e-05	3.49817e-05	92	49	0.546996	0.664525	Cluster5	0.807566
	1550	P461.PWY..hexitol.fermentation.to.lactate..formate..ethanol.and.acetate	Cluster	Cluster4	3.47468e-06	5.79198e-06	92	14	0.550124	0.667247	Cluster5	0.808513
	1551	PWY0.1241..ADP.L.glycero..beta..D.manno.heptose.biosynthesis	Cluster	Cluster2	-1.91828e-06	3.24713e-06	92	10	0.555188	0.672305	Cluster5	0.811562
	1552	PWY.4984..urea.cycle	Cluster	Cluster6	-5.68265e-06	9.75161e-06	92	21	0.560122	0.676677	Cluster5	0.816228
	1553	PWY.7228..superpathway.of.guanosine.nucleotides.de.novo.biosynthesis.I	Cluster	Cluster3	-7.03702e-05	0.000120445	92	63	0.560598	0.676677	Cluster5	0.816498
	1554	P164.PWY..purine.nucleobases.degradation.I..anaerobic.	Cluster	Cluster3	-4.8462e-05	8.54657e-05	92	44	0.572162	0.689529	Cluster5	0.826242
	1555	ANAEROFRUCAT.PWY..homolactic.fermentation	Cluster	Cluster4	-2.86888e-05	5.1334e-05	92	50	0.577691	0.695078	Cluster5	0.831983
	1556	PWY0.862...5Z..dodecenoate.biosynthesis.I	Cluster	Cluster3	-1.22694e-05	2.20878e-05	92	17	0.579997	0.696737	Cluster5	0.834376
	1557	UNINTEGRATED	Cluster	Cluster4	0.0021859	0.00398534	92	92	0.584905	0.701513	Cluster5	0.839289
	1558	PWY4FS.7..phosphatidylglycerol.biosynthesis.I..plastidic.	Cluster	Cluster2	-2.33973e-05	4.32466e-05	92	46	0.589917	0.704155	Cluster5	0.843896
	1559	PWY4FS.8..phosphatidylglycerol.biosynthesis.II..non.plastidic.	Cluster	Cluster2	-2.33973e-05	4.32466e-05	92	46	0.589916	0.704155	Cluster5	0.843896
	1560	PYRIDOXSYN.PWY..pyridoxal.5..phosphate.biosynthesis.I	Cluster	Cluster3	-1.4604e-05	2.69557e-05	92	26	0.589358	0.704155	Cluster5	0.843896
	1561	P161.PWY..acetylene.degradation..anaerobic.	Cluster	Cluster6	3.56516e-05	6.65745e-05	92	46	0.59404	0.707716	Cluster5	0.846349
	1562	PWY.5130..2.oxobutanoate.degradation.I	Cluster	Cluster6	-1.01221e-05	1.89402e-05	92	24	0.594782	0.707716	Cluster5	0.846977
	1563	HEME.BIOSYNTHESIS.II..heme.b.biosynthesis.I..aerobic.	Cluster	Cluster4	-5.95142e-06	1.12734e-05	92	33	0.598953	0.71062	Cluster5	0.85013
	1564	PWY.6588..pyruvate.fermentation.to.acetone	Cluster	Cluster6	5.91144e-06	1.12402e-05	92	21	0.599113	0.71062	Cluster5	0.85013
	1565	PWY.6126..superpathway.of.adenosine.nucleotides.de.novo.biosynthesis.II	Cluster	Cluster3	-7.49415e-05	0.000142694	92	63	0.600816	0.711517	Cluster5	0.851257
	1566	PWY.621..sucrose.degradation.III..sucrose.invertase.	Cluster	Cluster4	8.0981e-06	1.607e-05	92	29	0.615633	0.727918	Cluster5	0.86641
	1567	PWY.6385..peptidoglycan.biosynthesis.III..mycobacteria.	Cluster	Cluster4	4.75482e-05	9.46731e-05	92	67	0.616773	0.728121	Cluster5	0.86641
	1568	PWY.7392..taxadiene.biosynthesis..engineered.	Cluster	Cluster3	-2.85384e-05	5.76089e-05	92	15	0.621584	0.73265	Cluster5	0.871457
	1569	PWY.7282..4.amino.2.methyl.5.diphosphomethylpyrimidine.biosynthesis.II	Cluster	Cluster6	-2.39299e-05	4.86294e-05	92	32	0.62427	0.734666	Cluster5	0.872717
	1570	PWY.6859..all.trans.farnesol.biosynthesis	Cluster	Cluster3	-1.66419e-05	3.42522e-05	92	16	0.62829	0.738241	Cluster5	0.874751
	1571	PWY.7111..pyruvate.fermentation.to.isobutanol..engineered.	Cluster	Cluster6	-3.65975e-05	7.54667e-05	92	49	0.629393	0.738383	Cluster5	0.875854
	1572	PWY.6121..5.aminoimidazole.ribonucleotide.biosynthesis.I	Cluster	Cluster4	6.04682e-05	0.000125364	92	71	0.630786	0.738865	Cluster5	0.877358
	1573	GLCMANNANAUT.PWY..superpathway.of.N.acetylglucosamine..N.acetylmannosamine.and.N.acetylneuraminate.degradation	Cluster	Cluster4	1.25189e-05	2.62381e-05	92	44	0.634471	0.742025	Cluster5	0.881174
	1574	HEMESYN2.PWY..heme.b.biosynthesis.II..oxygen.independent.	Cluster	Cluster4	-6.45877e-06	1.38e-05	92	32	0.640998	0.743874	Cluster5	0.884992
	1575	HISTSYN.PWY..L.histidine.biosynthesis	Cluster	Cluster6	-1.98511e-05	4.22768e-05	92	13	0.640111	0.743874	Cluster5	0.884992
	1576	PWY.5265..peptidoglycan.biosynthesis.II..staphylococci.	Cluster	Cluster3	-8.29508e-05	0.000177253	92	56	0.640973	0.743874	Cluster5	0.884992
	1577	PWY.7345..superpathway.of.anaerobic.sucrose.degradation	Cluster	Cluster3	-2.48009e-05	5.27139e-05	92	18	0.63931	0.743874	Cluster5	0.8844
	1578	PWY0.1296..purine.ribonucleosides.degradation	Cluster	Cluster4	-1.27579e-05	2.70727e-05	92	52	0.638692	0.743874	Cluster5	0.88398
	1579	PWY.7392..taxadiene.biosynthesis..engineered.	Cluster	Cluster4	-9.35676e-06	2.02406e-05	92	15	0.645094	0.747475	Cluster5	0.888443
	1580	PWY0.1297..superpathway.of.purine.deoxyribonucleosides.degradation	Cluster	Cluster6	-2.02156e-05	4.39222e-05	92	37	0.646838	0.748342	Cluster5	0.889443
	1581	PPGPPMET.PWY..ppGpp.metabolism	Cluster	Cluster6	-8.80095e-06	1.92628e-05	92	26	0.649304	0.749038	Cluster5	0.891819
	1582	PWY.7229..superpathway.of.adenosine.nucleotides.de.novo.biosynthesis.I	Cluster	Cluster4	-3.32223e-05	7.28329e-05	92	63	0.649432	0.749038	Cluster5	0.891819
	1583	PWY.7229..superpathway.of.adenosine.nucleotides.de.novo.biosynthesis.I	Cluster	Cluster3	-9.21349e-05	0.000203765	92	63	0.652299	0.751193	Cluster5	0.893655
	1584	GLYCOLYSIS..glycolysis.I..from.glucose.6.phosphate.	Cluster	Cluster2	4.74492e-05	0.000106198	92	64	0.656232	0.754567	Cluster5	0.895905
	1585	PWY.4984..urea.cycle	Cluster	Cluster3	-5.10334e-06	1.15847e-05	92	21	0.659596	0.757277	Cluster5	0.898752
	1586	GLCMANNANAUT.PWY..superpathway.of.N.acetylglucosamine..N.acetylmannosamine.and.N.acetylneuraminate.degradation	Cluster	Cluster3	-3.17516e-05	7.30113e-05	92	44	0.664775	0.760868	Cluster5	0.900137
	1587	PWY.5384..sucrose.degradation.IV..sucrose.phosphorylase.	Cluster	Cluster4	2.0738e-05	4.7638e-05	92	44	0.664405	0.760868	Cluster5	0.900137
	1588	PWY.6902..chitin.degradation.II..Vibrio.	Cluster	Cluster2	-1.20196e-06	2.75898e-06	92	14	0.66576	0.760868	Cluster5	0.901035
	1589	CITRULBIO.PWY..L.citrulline.biosynthesis	Cluster	Cluster3	-6.8858e-06	1.63814e-05	92	22	0.675442	0.761517	Cluster5	0.906285
	1590	PWY.4984..urea.cycle	Cluster	Cluster2	-2.13582e-06	4.98152e-06	92	21	0.668143	0.761517	Cluster5	0.90276
	1591	PWY.5130..2.oxobutanoate.degradation.I	Cluster	Cluster3	-9.20019e-06	2.18593e-05	92	24	0.674887	0.761517	Cluster5	0.906285
	1592	PWY.5484..glycolysis.II..from.fructose.6.phosphate.	Cluster	Cluster4	-2.46352e-05	5.80636e-05	92	52	0.672433	0.761517	Cluster5	0.905384
	1593	PWY.621..sucrose.degradation.III..sucrose.invertase.	Cluster	Cluster3	-1.9255e-05	4.55506e-05	92	29	0.673544	0.761517	Cluster5	0.90556
	1594	PWY.6609..adenine.and.adenosine.salvage.III	Cluster	Cluster4	-5.58154e-05	0.000131211	92	58	0.671608	0.761517	Cluster5	0.905384
	1595	PWY.6859..all.trans.farnesol.biosynthesis	Cluster	Cluster4	-5.11114e-06	1.20331e-05	92	16	0.672116	0.761517	Cluster5	0.905384
	1596	PWY.7199..pyrimidine.deoxyribonucleosides.salvage	Cluster	Cluster4	-4.92438e-05	0.00011554	92	66	0.671075	0.761517	Cluster5	0.905384
	1597	PWY.7345..superpathway.of.anaerobic.sucrose.degradation	Cluster	Cluster2	-9.53638e-06	2.26753e-05	92	18	0.675203	0.761517	Cluster5	0.906285
	1598	GLYCOCAT.PWY..glycogen.degradation.I	Cluster	Cluster6	2.43959e-05	5.86283e-05	92	10	0.678577	0.761626	Cluster5	0.907028
	1599	PWY.5981..CDP.diacylglycerol.biosynthesis.III	Cluster	Cluster3	-6.14716e-05	0.000147695	92	30	0.678284	0.761626	Cluster5	0.907028
	1600	PWY.7383..anaerobic.energy.metabolism..invertebrates..cytosol.	Cluster	Cluster4	-6.47316e-06	1.55566e-05	92	25	0.678359	0.761626	Cluster5	0.907028
	1601	PWY.6527..stachyose.degradation	Cluster	Cluster2	-1.90868e-05	4.61939e-05	92	58	0.680485	0.76263	Cluster5	0.90768
	1602	ARGSYNBSUB.PWY..L.arginine.biosynthesis.II..acetyl.cycle.	Cluster	Cluster6	-2.14285e-05	5.37694e-05	92	24	0.691447	0.773762	Cluster5	0.914232
	1603	GLUCOSE1PMETAB.PWY..glucose.and.glucose.1.phosphate.degradation	Cluster	Cluster6	-8.80057e-05	0.000225802	92	22	0.698013	0.779949	Cluster5	0.918163
	1604	PWY.6902..chitin.degradation.II..Vibrio.	Cluster	Cluster3	-2.46172e-06	6.40471e-06	92	14	0.703005	0.784362	Cluster5	0.919365
	1605	GLYCOLYSIS..glycolysis.I..from.glucose.6.phosphate.	Cluster	Cluster4	3.39033e-05	8.96789e-05	92	64	0.706314	0.784562	Cluster5	0.921051
	1606	PWY.6527..stachyose.degradation	Cluster	Cluster6	-3.4028e-05	8.96831e-05	92	58	0.705297	0.784562	Cluster5	0.92085
	1607	PWY.7208..superpathway.of.pyrimidine.nucleobases.salvage	Cluster	Cluster4	1.67871e-05	4.43896e-05	92	68	0.706281	0.784562	Cluster5	0.921051
	1608	POLYAMSYN.PWY..superpathway.of.polyamine.biosynthesis.I	Cluster	Cluster3	-4.32016e-06	1.15238e-05	92	12	0.707805	0.785033	Cluster5	0.921654
	1609	PWY.4984..urea.cycle	Cluster	Cluster4	1.5718e-06	4.20858e-06	92	21	0.708827	0.785033	Cluster5	0.922148
	1610	LACTOSECAT.PWY..lactose.and.galactose.degradation.I	Cluster	Cluster3	-9.55409e-05	0.000260919	92	61	0.715413	0.790846	Cluster5	0.927595
	1611	POLYAMSYN.PWY..superpathway.of.polyamine.biosynthesis.I	Cluster	Cluster4	-1.55349e-06	4.27314e-06	92	12	0.716257	0.790846	Cluster5	0.928261
	1612	PPGPPMET.PWY..ppGpp.metabolism	Cluster	Cluster4	-2.86923e-06	7.94869e-06	92	26	0.719009	0.790846	Cluster5	0.929144
	1613	PWY.1269..CMP.3.deoxy.D.manno.octulosonate.biosynthesis	Cluster	Cluster6	-1.48851e-05	4.16233e-05	92	45	0.721759	0.790846	Cluster5	0.92948
	1614	PWY.6147..6.hydroxymethyl.dihydropterin.diphosphate.biosynthesis.I	Cluster	Cluster4	-2.99092e-05	8.35063e-05	92	75	0.72112	0.790846	Cluster5	0.92948
	1615	PWY4FS.7..phosphatidylglycerol.biosynthesis.I..plastidic.	Cluster	Cluster6	-3.06637e-05	8.59735e-05	92	46	0.722487	0.790846	Cluster5	0.92948
	1616	PWY4FS.8..phosphatidylglycerol.biosynthesis.II..non.plastidic.	Cluster	Cluster6	-3.06636e-05	8.59736e-05	92	46	0.722488	0.790846	Cluster5	0.92948
	1617	SER.GLYSYN.PWY..superpathway.of.L.serine.and.glycine.biosynthesis.I	Cluster	Cluster4	9.83402e-06	2.73556e-05	92	55	0.720244	0.790846	Cluster5	0.929144
	1618	POLYISOPRENSYN.PWY..polyisoprenoid.biosynthesis..E..coli.	Cluster	Cluster4	7.22412e-06	2.04635e-05	92	30	0.724932	0.7921	Cluster5	0.930494
	1619	PWY.5265..peptidoglycan.biosynthesis.II..staphylococci.	Cluster	Cluster6	-5.43726e-05	0.000154921	92	56	0.726794	0.7921	Cluster5	0.930831
	1620	PWY.5367..petroselinate.biosynthesis	Cluster	Cluster3	-2.62623e-05	7.47253e-05	92	32	0.726099	0.7921	Cluster5	0.930831
	1621	PWY0.1241..ADP.L.glycero..beta..D.manno.heptose.biosynthesis	Cluster	Cluster4	9.6178e-07	2.79401e-06	92	10	0.73095	0.795476	Cluster5	0.931087
	1622	PWY.5981..CDP.diacylglycerol.biosynthesis.III	Cluster	Cluster4	-1.82673e-05	5.47668e-05	92	30	0.739525	0.803645	Cluster5	0.935907
	1623	ANAGLYCOLYSIS.PWY..glycolysis.III..from.glucose.	Cluster	Cluster4	3.18115e-05	9.62323e-05	92	55	0.741786	0.804939	Cluster5	0.935907
	1624	HEME.BIOSYNTHESIS.II..heme.b.biosynthesis.I..aerobic.	Cluster	Cluster6	9.35175e-06	2.85655e-05	92	33	0.744419	0.806633	Cluster5	0.93627
	1625	PWY.7345..superpathway.of.anaerobic.sucrose.degradation	Cluster	Cluster4	-6.11864e-06	1.9224e-05	92	18	0.751037	0.812633	Cluster5	0.941217
	1626	LACTOSECAT.PWY..lactose.and.galactose.degradation.I	Cluster	Cluster4	-3.04344e-05	9.64713e-05	92	61	0.753193	0.813795	Cluster5	0.941234
	1627	PWY.5384..sucrose.degradation.IV..sucrose.phosphorylase.	Cluster	Cluster6	3.36805e-05	0.000107486	92	44	0.754766	0.814277	Cluster5	0.942362
	1628	PWY.6317..D.galactose.degradation.I..Leloir.pathway.	Cluster	Cluster2	-1.89664e-05	6.10605e-05	92	73	0.756835	0.814277	Cluster5	0.942673
	1629	PWY.6969..TCA.cycle.V..2.oxoglutarate.synthase.	Cluster	Cluster4	-5.25193e-06	1.69116e-05	92	31	0.756888	0.814277	Cluster5	0.942673
	1630	PWY0.1241..ADP.L.glycero..beta..D.manno.heptose.biosynthesis	Cluster	Cluster3	-2.30625e-06	7.53489e-06	92	10	0.75979	0.816231	Cluster5	0.943744
	1631	CITRULBIO.PWY..L.citrulline.biosynthesis	Cluster	Cluster4	1.75565e-06	6.01459e-06	92	22	0.771071	0.827168	Cluster5	0.949535
	1632	PWY.5676..acetyl.CoA.fermentation.to.butanoate.II	Cluster	Cluster6	4.67064e-06	1.62235e-05	92	13	0.774259	0.829406	Cluster5	0.951659
	1633	PWY.6608..guanosine.nucleotides.degradation.III	Cluster	Cluster6	-2.63652e-05	9.25125e-05	92	50	0.776619	0.83075	Cluster5	0.95321
	1634	PWY.5981..CDP.diacylglycerol.biosynthesis.III	Cluster	Cluster6	-3.49553e-05	0.00012357	92	30	0.777943	0.830985	Cluster5	0.95321
	1635	PWY.5367..petroselinate.biosynthesis	Cluster	Cluster4	7.76658e-06	2.77089e-05	92	32	0.779919	0.831913	Cluster5	0.95321
	1636	PWY.6901..superpathway.of.glucose.and.xylose.degradation	Cluster	Cluster6	-1.15654e-05	4.30765e-05	92	31	0.789155	0.840573	Cluster5	0.95617
	1637	PWY.5667..CDP.diacylglycerol.biosynthesis.I	Cluster	Cluster4	-1.87467e-05	7.25485e-05	92	77	0.796706	0.847416	Cluster5	0.962002
	1638	PWY.5989..stearate.biosynthesis.II..bacteria.and.plants.	Cluster	Cluster4	-3.34681e-06	1.30999e-05	92	33	0.798953	0.848605	Cluster5	0.963008
	1639	GLUCOSE1PMETAB.PWY..glucose.and.glucose.1.phosphate.degradation	Cluster	Cluster4	-2.39225e-05	9.64704e-05	92	22	0.804736	0.853542	Cluster5	0.964471
	1640	PWY.7345..superpathway.of.anaerobic.sucrose.degradation	Cluster	Cluster6	1.04281e-05	4.42527e-05	92	18	0.814384	0.862559	Cluster5	0.970014
	1641	CITRULBIO.PWY..L.citrulline.biosynthesis	Cluster	Cluster2	-1.63096e-06	7.05141e-06	92	22	0.817704	0.864857	Cluster5	0.97191
	1642	PWY.6606..guanosine.nucleotides.degradation.II	Cluster	Cluster4	-3.92159e-06	1.74521e-05	92	12	0.822749	0.868971	Cluster5	0.97266
	1643	PWY0.1319..CDP.diacylglycerol.biosynthesis.II	Cluster	Cluster4	-1.61514e-05	7.23847e-05	92	78	0.823955	0.869024	Cluster5	0.97266
	1644	PWY.5130..2.oxobutanoate.degradation.I	Cluster	Cluster4	1.68494e-06	7.78372e-06	92	24	0.829134	0.873262	Cluster5	0.975186
	1645	PEPTIDOGLYCANSYN.PWY..peptidoglycan.biosynthesis.I..meso.diaminopimelate.containing.	Cluster	Cluster4	2.3836e-05	0.000113349	92	88	0.833951	0.877106	Cluster5	0.976788
	1646	ARGSYN.PWY..L.arginine.biosynthesis.I..via.L.ornithine.	Cluster	Cluster6	-1.16594e-05	5.58907e-05	92	22	0.835358	0.87736	Cluster5	0.976788
	1647	PWY.6969..TCA.cycle.V..2.oxoglutarate.synthase.	Cluster	Cluster6	8.01982e-06	4.04171e-05	92	31	0.843315	0.884481	Cluster5	0.97957
	1648	HSERMETANA.PWY..L.methionine.biosynthesis.III	Cluster	Cluster4	-7.94142e-06	4.06538e-05	92	57	0.845584	0.885626	Cluster5	0.980181
	1649	PWY.5918..superpathway.of.heme.b.biosynthesis.from.glutamate	Cluster	Cluster6	-7.70067e-06	4.06385e-05	92	29	0.85029	0.889315	Cluster5	0.980904
	1650	PWY.6387..UDP.N.acetylmuramoyl.pentapeptide.biosynthesis.I..meso.diaminopimelate.containing.	Cluster	Cluster4	-2.15524e-05	0.000116382	92	89	0.853527	0.891462	Cluster5	0.982364
	1651	P164.PWY..purine.nucleobases.degradation.I..anaerobic.	Cluster	Cluster4	-5.57838e-06	3.03928e-05	92	44	0.854807	0.89156	Cluster5	0.982364
	1652	POLYISOPRENSYN.PWY..polyisoprenoid.biosynthesis..E..coli.	Cluster	Cluster6	8.92554e-06	4.92667e-05	92	30	0.856804	0.892405	Cluster5	0.98265
	1653	PWY.922..mevalonate.pathway.I..eukaryotes.and.bacteria.	Cluster	Cluster6	-2.86255e-05	0.000159951	92	50	0.858382	0.892812	Cluster5	0.983018
	1654	GLUCONEO.PWY..gluconeogenesis.I	Cluster	Cluster6	-8.59278e-06	4.92862e-05	92	34	0.862107	0.895448	Cluster5	0.984802
	1655	P461.PWY..hexitol.fermentation.to.lactate..formate..ethanol.and.acetate	Cluster	Cluster2	-1.15155e-06	6.73129e-06	92	14	0.864562	0.89676	Cluster5	0.986717
	1656	PYRIDOXSYN.PWY..pyridoxal.5..phosphate.biosynthesis.I	Cluster	Cluster4	-1.57216e-06	9.48134e-06	92	26	0.868703	0.899814	Cluster5	0.988233
	1657	PWY.6606..guanosine.nucleotides.degradation.II	Cluster	Cluster3	-7.61052e-06	4.72972e-05	92	12	0.872611	0.902618	Cluster5	0.989542
	1658	PWY.5367..petroselinate.biosynthesis	Cluster	Cluster6	-9.35035e-06	6.25196e-05	92	32	0.881459	0.909269	Cluster5	0.994246
	1659	PWY.922..mevalonate.pathway.I..eukaryotes.and.bacteria.	Cluster	Cluster3	-2.86255e-05	0.000191178	92	50	0.881322	0.909269	Cluster5	0.994246
	1660	PWY.7323..superpathway.of.GDP.mannose.derived.O.antigen.building.blocks.biosynthesis	Cluster	Cluster6	-3.72822e-06	2.76921e-05	92	27	0.893306	0.920227	Cluster5	1
	1661	TRNA.CHARGING.PWY..tRNA.charging	Cluster	Cluster4	2.16658e-05	0.000165527	92	86	0.896164	0.921909	Cluster5	1
	1662	GLUCONEO.PWY..gluconeogenesis.I	Cluster	Cluster4	2.46626e-06	2.17832e-05	92	34	0.910129	0.932132	Cluster5	1
	1663	P41.PWY..pyruvate.fermentation.to.acetate.and..S..lactate.I	Cluster	Cluster4	1.27107e-05	0.000113001	92	87	0.9107	0.932132	Cluster5	1
	1664	PWY.1269..CMP.3.deoxy.D.manno.octulosonate.biosynthesis	Cluster	Cluster4	-1.75441e-06	1.53863e-05	92	45	0.909505	0.932132	Cluster5	1
	1665	PWY.5100..pyruvate.fermentation.to.acetate.and.lactate.II	Cluster	Cluster4	1.26589e-05	0.000112998	92	88	0.91106	0.932132	Cluster5	1
	1666	PWY.6386..UDP.N.acetylmuramoyl.pentapeptide.biosynthesis.II..lysine.containing.	Cluster	Cluster4	-1.06777e-05	0.000114261	92	88	0.925767	0.945892	Cluster5	1
	1667	PWY.621..sucrose.degradation.III..sucrose.invertase.	Cluster	Cluster6	-3.4673e-06	4.04531e-05	92	29	0.931958	0.950926	Cluster5	1
	1668	GLCMANNANAUT.PWY..superpathway.of.N.acetylglucosamine..N.acetylmannosamine.and.N.acetylneuraminate.degradation	Cluster	Cluster2	-2.32059e-06	3.13707e-05	92	44	0.941209	0.954087	Cluster5	1
	1669	P161.PWY..acetylene.degradation..anaerobic.	Cluster	Cluster4	2.19454e-06	2.94127e-05	92	46	0.940702	0.954087	Cluster5	1
	1670	P461.PWY..hexitol.fermentation.to.lactate..formate..ethanol.and.acetate	Cluster	Cluster3	-1.15155e-06	1.56198e-05	92	14	0.941399	0.954087	Cluster5	1
	1671	PWY.6628..superpathway.of.L.phenylalanine.biosynthesis	Cluster	Cluster4	3.13371e-06	4.14507e-05	92	46	0.939919	0.954087	Cluster5	1
	1672	PWY.6902..chitin.degradation.II..Vibrio.	Cluster	Cluster4	1.83038e-07	2.36707e-06	92	14	0.938863	0.954087	Cluster5	1
	1673	PWY.6630..superpathway.of.L.tyrosine.biosynthesis	Cluster	Cluster4	-1.698e-06	3.62704e-05	92	47	0.962776	0.974439	Cluster5	1
	1674	X1CMET2.PWY..folate.transformations.III..E..coli.	Cluster	Cluster6	-1.12642e-06	3.46015e-05	92	20	0.97412	0.983737	Cluster5	1
	1675	GLYCOCAT.PWY..glycogen.degradation.I	Cluster	Cluster3	-2.00849e-06	7.00328e-05	92	10	0.977196	0.983737	Cluster5	1
	1676	PWY.5005..biotin.biosynthesis.II	Cluster	Cluster4	-1.91745e-07	6.49315e-06	92	25	0.976515	0.983737	Cluster5	1
	1677	PWY0.1477..ethanolamine.utilization	Cluster	Cluster4	-8.86733e-07	3.00648e-05	92	49	0.976542	0.983737	Cluster5	1
	1678	PWY.7663..gondoate.biosynthesis..anaerobic.	Cluster	Cluster6	-2.17713e-06	8.39088e-05	92	55	0.97938	0.984617	Cluster5	1
	1679	PWY.7117..C4.photosynthetic.carbon.assimilation.cycle..PEPCK.type	Cluster	Cluster4	5.49359e-07	2.95034e-05	92	42	0.985188	0.989134	Cluster5	1
	1680	GLYCOCAT.PWY..glycogen.degradation.I	Cluster	Cluster2	-9.67368e-08	3.01438e-05	92	10	0.997448	1	Cluster5	1
	1681	PWY.702..L.methionine.biosynthesis.II	Cluster	Cluster3	3.76459e-21	7.90187e-05	92	11	1	1	Cluster5	1
	1682	PWY.I9..L.cysteine.biosynthesis.VI..from.L.methionine.	Cluster	Cluster3	-2.63521e-20	8.6625e-05	92	12	1	1	Cluster5	1
	1683	PWY.7197..pyrimidine.deoxyribonucleotide.phosphorylation	Cluster	Cluster4	-0.00138964	5.97225e-05	74	49	1.14854e-34	3.23888e-32	Cluster3	4.61221e-32
	1684	PWY.7197..pyrimidine.deoxyribonucleotide.phosphorylation	Cluster	Cluster2	-0.00143885	6.12389e-05	74	49	6.27494e-35	3.23888e-32	Cluster3	2.93981e-32
	1685	PWY.7197..pyrimidine.deoxyribonucleotide.phosphorylation	Cluster	Cluster6	-0.00144808	7.55436e-05	74	49	1.44785e-29	2.72196e-27	Cluster3	2.39406e-27
	1686	PWY.5384..sucrose.degradation.IV..sucrose.phosphorylase.	Cluster	Cluster4	-0.00193532	0.000128352	74	40	1.11727e-23	1.57535e-21	Cluster3	1.12166e-21
	1687	PWY.5384..sucrose.degradation.IV..sucrose.phosphorylase.	Cluster	Cluster2	-0.00187295	0.000131611	74	40	2.39747e-22	2.70434e-20	Cluster3	1.92551e-20
	1688	P161.PWY..acetylene.degradation..anaerobic.	Cluster	Cluster2	-0.00133373	8.4354e-05	74	37	6.27079e-21	5.89454e-19	Cluster3	4.00618e-19
	1689	PWY0.1477..ethanolamine.utilization	Cluster	Cluster2	-0.00133229	8.65713e-05	74	39	3.62528e-20	2.92094e-18	Cluster3	2.21536e-18
	1690	P161.PWY..acetylene.degradation..anaerobic.	Cluster	Cluster4	-0.00135278	8.2709e-05	74	37	5.17745e-20	3.6501e-18	Cluster3	3.09655e-18
	1691	PWY0.1477..ethanolamine.utilization	Cluster	Cluster4	-0.00135165	8.48503e-05	74	39	3.00468e-19	1.88293e-17	Cluster3	1.68923e-17
	1692	PWY.6317..D.galactose.degradation.I..Leloir.pathway.	Cluster	Cluster4	-0.0016147	0.000133359	74	59	7.76327e-19	4.37849e-17	Cluster3	4.19665e-17
	1693	PWY.5384..sucrose.degradation.IV..sucrose.phosphorylase.	Cluster	Cluster6	-0.00192238	0.000162354	74	40	2.23344e-18	1.14514e-16	Cluster3	1.14149e-16
	1694	PWY.6317..D.galactose.degradation.I..Leloir.pathway.	Cluster	Cluster2	-0.00157637	0.000136746	74	59	7.77921e-18	3.65623e-16	Cluster3	3.52699e-16
	1695	P161.PWY..acetylene.degradation..anaerobic.	Cluster	Cluster6	-0.00132154	0.000104228	74	37	1.47124e-16	6.3829e-15	Cluster3	5.99369e-15
	1696	PWY.7208..superpathway.of.pyrimidine.nucleobases.salvage	Cluster	Cluster2	-0.00140346	0.00013098	74	53	3.06521e-16	1.23484e-14	Cluster3	1.15619e-14
	1697	PWY.6317..D.galactose.degradation.I..Leloir.pathway.	Cluster	Cluster6	-0.00172695	0.000168688	74	59	1.49226e-15	5.61091e-14	Cluster3	5.11555e-14
	1698	PWY0.1477..ethanolamine.utilization	Cluster	Cluster6	-0.00124492	0.000106945	74	39	4.34927e-15	1.53312e-13	Cluster3	1.32889e-13
	1699	PWY.7208..superpathway.of.pyrimidine.nucleobases.salvage	Cluster	Cluster4	-0.00124536	0.000131445	74	53	8.51725e-14	2.82572e-12	Cluster3	2.19651e-12
	1700	PWY0.1319..CDP.diacylglycerol.biosynthesis.II	Cluster	Cluster2	0.00176928	0.000203852	74	64	1.02622e-12	3.21549e-11	Cluster3	2.16895e-11
	1701	PWY.5667..CDP.diacylglycerol.biosynthesis.I	Cluster	Cluster2	0.00176928	0.000204276	74	63	1.10737e-12	3.28713e-11	Cluster3	2.30578e-11
	1702	PWY.922..mevalonate.pathway.I..eukaryotes.and.bacteria.	Cluster	Cluster2	0.00180652	0.000210677	74	42	1.59656e-12	4.5023e-11	Cluster3	3.22873e-11
	1703	LACTOSECAT.PWY..lactose.and.galactose.degradation.I	Cluster	Cluster2	0.00230306	0.000251795	74	51	2.44614e-12	6.56965e-11	Cluster3	4.80847e-11
	1704	PWY.7208..superpathway.of.pyrimidine.nucleobases.salvage	Cluster	Cluster6	-0.00139455	0.00016668	74	53	1.27323e-11	3.26409e-10	Cluster3	2.38603e-10
	1705	PWY.7790..UMP.biosynthesis.II	Cluster	Cluster2	0.00271734	0.000357222	74	70	1.93299e-10	4.74003e-09	Cluster3	3.19626e-09
	1706	PWY.7791..UMP.biosynthesis.III	Cluster	Cluster2	0.00271488	0.000357271	74	70	2.03036e-10	4.77134e-09	Cluster3	3.33762e-09
	1707	PWY.6147..6.hydroxymethyl.dihydropterin.diphosphate.biosynthesis.I	Cluster	Cluster2	0.00175716	0.000240994	74	61	1.79795e-09	4.05617e-08	Cluster3	2.68831e-08
	1708	PWY.5686..UMP.biosynthesis.I	Cluster	Cluster2	0.00270609	0.000403116	74	70	1.50764e-08	3.27041e-07	Cluster3	1.93514e-07
	1709	PWY.1042..glycolysis.IV	Cluster	Cluster2	-0.00132408	0.000224025	74	58	1.3072e-07	2.7306e-06	Cluster3	1.48767e-06
	1710	COA.PWY..coenzyme.A.biosynthesis.I..prokaryotic.	Cluster	Cluster6	-0.00134547	0.00025291	74	71	1.18342e-06	2.38374e-05	Cluster3	1.10152e-05
	1711	PWY.3841..folate.transformations.II..plants.	Cluster	Cluster6	-0.00147737	0.000290899	74	62	3.01658e-06	5.86672e-05	Cluster3	2.60911e-05
	1712	GLYCOLYSIS..glycolysis.I..from.glucose.6.phosphate.	Cluster	Cluster4	-0.00130897	0.000256629	74	51	4.62289e-06	8.69103e-05	Cluster3	3.81936e-05
	1713	GLYCOLYSIS..glycolysis.I..from.glucose.6.phosphate.	Cluster	Cluster2	-0.0012977	0.000260307	74	51	5.78348e-06	0.000105222	Cluster3	4.60549e-05
	1714	PWY.1042..glycolysis.IV	Cluster	Cluster6	-0.00139836	0.000283593	74	58	7.52245e-06	0.000132583	Cluster3	5.88334e-05
	1715	GLYCOLYSIS..glycolysis.I..from.glucose.6.phosphate.	Cluster	Cluster6	-0.00158934	0.000322949	74	51	8.58283e-06	0.000146688	Cluster3	6.52063e-05
	1716	PWY.3841..folate.transformations.II..plants.	Cluster	Cluster2	-0.00111066	0.000235816	74	62	1.21758e-05	0.000201975	Cluster3	8.93635e-05
	1717	PWY.7851..coenzyme.A.biosynthesis.II..eukaryotic.	Cluster	Cluster6	-0.00118512	0.000252901	74	71	1.33005e-05	0.000214327	Cluster3	9.63597e-05
	1718	PWY.3841..folate.transformations.II..plants.	Cluster	Cluster4	-0.00105272	0.000229976	74	62	1.98657e-05	0.000311229	Cluster3	0.000137883
	1719	PWY.6151..S.adenosyl.L.methionine.salvage.I	Cluster	Cluster4	0.00138009	0.000291916	74	61	2.10912e-05	0.000321499	Cluster3	0.000146028
	1720	PWY.1042..glycolysis.IV	Cluster	Cluster4	-0.00102678	0.000224176	74	58	2.33403e-05	0.000346419	Cluster3	0.000160414
	1721	P41.PWY..pyruvate.fermentation.to.acetate.and..S..lactate.I	Cluster	Cluster2	0.0014496	0.000319247	74	70	3.08953e-05	0.000441061	Cluster3	0.000207271
	1722	PWY.5100..pyruvate.fermentation.to.acetate.and.lactate.II	Cluster	Cluster2	0.0014491	0.00031944	74	71	3.12809e-05	0.000441061	Cluster3	0.000208862
	1723	PWY.6123..inosine.5..phosphate.biosynthesis.I	Cluster	Cluster4	0.0012961	0.000289369	74	56	4.43055e-05	0.00060947	Cluster3	0.000285648
	1724	PWY.5686..UMP.biosynthesis.I	Cluster	Cluster4	0.00171412	0.000394358	74	70	7.63591e-05	0.00102539	Cluster3	0.000468658
	1725	PWY.7790..UMP.biosynthesis.II	Cluster	Cluster4	0.00149494	0.000354782	74	70	9.28786e-05	0.00119936	Cluster3	0.000560261
	1726	PWY.7791..UMP.biosynthesis.III	Cluster	Cluster4	0.00149436	0.000354727	74	70	9.35675e-05	0.00119936	Cluster3	0.000563208
	1727	PWY.5941..glycogen.degradation.II	Cluster	Cluster4	0.00186751	0.000443832	74	55	0.000104644	0.00131154	Cluster3	0.000616677
	1728	COA.PWY.1..superpathway.of.coenzyme.A.biosynthesis.III..mammals.	Cluster	Cluster2	-0.00100164	0.000242578	74	63	0.000111759	0.00137026	Cluster3	0.000654184
	1729	PWY.7199..pyrimidine.deoxyribonucleosides.salvage	Cluster	Cluster2	-0.00146379	0.000361656	74	52	0.000141416	0.001697	Cluster3	0.000814975
	1730	PWY.7238..sucrose.biosynthesis.II	Cluster	Cluster4	0.00222643	0.000543879	74	55	0.000152091	0.00178707	Cluster3	0.000868959
	1731	COA.PWY.1..superpathway.of.coenzyme.A.biosynthesis.III..mammals.	Cluster	Cluster6	-0.00122448	0.000303243	74	63	0.000174284	0.00200605	Cluster3	0.000975923
	1732	PWY.7234..inosine.5..phosphate.biosynthesis.III	Cluster	Cluster4	0.00118172	0.00029217	74	53	0.000189436	0.00213684	Cluster3	0.00105866
	1733	PWY.4041...gamma..glutamyl.cycle	Cluster	Cluster6	0.000135409	3.47741e-05	74	32	0.000222724	0.00246307	Cluster3	0.00123001
	1734	PWY.6124..inosine.5..phosphate.biosynthesis.II	Cluster	Cluster4	0.00114016	0.000286021	74	55	0.000229857	0.00249307	Cluster3	0.00125219
	1735	PWY.6385..peptidoglycan.biosynthesis.III..mycobacteria.	Cluster	Cluster4	0.000947388	0.000238116	74	50	0.000259484	0.0027613	Cluster3	0.00140002
	1736	PWY.6122..5.aminoimidazole.ribonucleotide.biosynthesis.II	Cluster	Cluster4	0.00129373	0.000344749	74	57	0.000461126	0.00472864	Cluster3	0.00236107
	1737	PWY.6277..superpathway.of.5.aminoimidazole.ribonucleotide.biosynthesis	Cluster	Cluster4	0.00129373	0.000344749	74	57	0.000461126	0.00472864	Cluster3	0.00236107
	1738	PWY.6386..UDP.N.acetylmuramoyl.pentapeptide.biosynthesis.II..lysine.containing.	Cluster	Cluster6	-0.00148147	0.000397743	74	71	0.000493822	0.00497349	Cluster3	0.00251473
	1739	GLUTORN.PWY..L.ornithine.biosynthesis.I	Cluster	Cluster6	6.8292e-05	1.88678e-05	74	17	0.000553909	0.00548079	Cluster3	0.00280548
	1740	PEPTIDOGLYCANSYN.PWY..peptidoglycan.biosynthesis.I..meso.diaminopimelate.containing.	Cluster	Cluster6	-0.00142724	0.000398085	74	71	0.000756096	0.00735238	Cluster3	0.00367079
	1741	COA.PWY..coenzyme.A.biosynthesis.I..prokaryotic.	Cluster	Cluster4	-0.000699803	0.000199943	74	71	0.000813738	0.00777878	Cluster3	0.00391011
	1742	PWY.6305..superpathway.of.putrescine.biosynthesis	Cluster	Cluster6	4.70756e-05	1.41536e-05	74	23	0.0010814	0.0101652	Cluster3	0.0050162
	1743	PWY.6121..5.aminoimidazole.ribonucleotide.biosynthesis.I	Cluster	Cluster4	0.00112929	0.00033197	74	55	0.00128842	0.0119126	Cluster3	0.00584155
	1744	PWY.6387..UDP.N.acetylmuramoyl.pentapeptide.biosynthesis.I..meso.diaminopimelate.containing.	Cluster	Cluster6	-0.00139739	0.000412747	74	72	0.00137188	0.0124797	Cluster3	0.0061505
	1745	P461.PWY..hexitol.fermentation.to.lactate..formate..ethanol.and.acetate	Cluster	Cluster6	7.00864e-05	2.12714e-05	74	12	0.00154733	0.0138523	Cluster3	0.00683944
	1746	UDPNAGSYN.PWY..UDP.N.acetyl.D.glucosamine.biosynthesis.I	Cluster	Cluster6	-0.00143832	0.000434932	74	72	0.00169249	0.0149151	Cluster3	0.00744538
	1747	PWY.7199..pyrimidine.deoxyribonucleosides.salvage	Cluster	Cluster4	-0.00116507	0.000360998	74	52	0.00205303	0.017814	Cluster3	0.00882428
	1748	P41.PWY..pyruvate.fermentation.to.acetate.and..S..lactate.I	Cluster	Cluster6	-0.00127562	0.000395259	74	70	0.00219918	0.018793	Cluster3	0.00939499
	1749	PWY.5100..pyruvate.fermentation.to.acetate.and.lactate.II	Cluster	Cluster6	-0.00125265	0.00039555	74	71	0.00261608	0.0220219	Cluster3	0.0110252
	1750	PWY.7199..pyrimidine.deoxyribonucleosides.salvage	Cluster	Cluster6	-0.0014229	0.0004559	74	52	0.00289202	0.0239867	Cluster3	0.0119903
	1751	PWY.7221..guanosine.ribonucleotides.de.novo.biosynthesis	Cluster	Cluster2	-0.00131503	0.000433971	74	67	0.00366363	0.0299462	Cluster3	0.0147966
	1752	FASYN.ELONG.PWY..fatty.acid.elongation....saturated	Cluster	Cluster6	7.76799e-05	2.63088e-05	74	8	0.00428616	0.0345342	Cluster3	0.0169457
	1753	PWY.7664..oleate.biosynthesis.IV..anaerobic.	Cluster	Cluster6	7.19699e-05	2.44985e-05	74	8	0.00447338	0.0355351	Cluster3	0.0175624
	1754	PWY.6163..chorismate.biosynthesis.from.3.dehydroquinate	Cluster	Cluster4	0.000738069	0.000251037	74	45	0.00477912	0.0374364	Cluster3	0.0186068
	1755	PWY.6282..palmitoleate.biosynthesis.I..from..5Z..dodec.5.enoate.	Cluster	Cluster6	6.60909e-05	2.27181e-05	74	8	0.00485363	0.0374993	Cluster3	0.0188708
	1756	UDPNAGSYN.PWY..UDP.N.acetyl.D.glucosamine.biosynthesis.I	Cluster	Cluster2	0.0010066	0.000347938	74	72	0.0052702	0.0401675	Cluster3	0.0202661
	1757	PWY.5265..peptidoglycan.biosynthesis.II..staphylococci.	Cluster	Cluster4	0.000533643	0.000187646	74	46	0.00615562	0.0462902	Cluster3	0.023102
	1758	PWY.7221..guanosine.ribonucleotides.de.novo.biosynthesis	Cluster	Cluster6	-0.00153397	0.000538289	74	67	0.00626901	0.0465226	Cluster3	0.023465
	1759	TRNA.CHARGING.PWY..tRNA.charging	Cluster	Cluster6	-0.00158707	0.000570664	74	70	0.00695527	0.0509451	Cluster3	0.0256578
	1760	OANTIGEN.PWY..O.antigen.building.blocks.biosynthesis..E..coli.	Cluster	Cluster4	0.000537576	0.000192654	74	47	0.0073762	0.0526605	Cluster3	0.0268693
	1761	PWY0.1586..peptidoglycan.maturation..meso.diaminopimelate.containing.	Cluster	Cluster4	0.000334539	0.000120543	74	50	0.00736062	0.0526605	Cluster3	0.0268693
	1762	DTDPRHAMSYN.PWY..dTDP..beta..L.rhamnose.biosynthesis	Cluster	Cluster4	0.000463933	0.000167769	74	48	0.00773342	0.0545206	Cluster3	0.0279776
	1763	ARO.PWY..chorismate.biosynthesis.I	Cluster	Cluster4	0.000703018	0.000257783	74	45	0.00855975	0.0596012	Cluster3	0.0307298
	1764	PWY.7851..coenzyme.A.biosynthesis.II..eukaryotic.	Cluster	Cluster4	-0.000539456	0.000199936	74	71	0.00873164	0.0600567	Cluster3	0.0311958
	1765	PANTO.PWY..phosphopantothenate.biosynthesis.I	Cluster	Cluster4	0.000537854	0.000202613	74	43	0.00982201	0.0667423	Cluster3	0.034642
	1766	GLYCOGENSYNTH.PWY..glycogen.biosynthesis.I..from.ADP.D.Glucose.	Cluster	Cluster4	0.000681933	0.000261848	74	48	0.0119682	0.0797156	Cluster3	0.0410777
	1767	PWY.8187..L.arginine.degradation.XIII..reductive.Stickland.reaction.	Cluster	Cluster4	0.000343172	0.000131757	74	47	0.0120139	0.0797156	Cluster3	0.0410878
	1768	NONMEVIPP.PWY..methylerythritol.phosphate.pathway.I	Cluster	Cluster4	0.000440309	0.000171252	74	41	0.0131957	0.0865391	Cluster3	0.0443167
	1769	HISTSYN.PWY..L.histidine.biosynthesis	Cluster	Cluster6	2.0529e-05	8.1226e-06	74	9	0.0148975	0.0965768	Cluster3	0.0486587
	1770	PWY0.1586..peptidoglycan.maturation..meso.diaminopimelate.containing.	Cluster	Cluster6	0.000379318	0.000152245	74	50	0.0157343	0.100843	Cluster3	0.051073
	1771	COMPLETE.ARO.PWY..superpathway.of.aromatic.amino.acid.biosynthesis	Cluster	Cluster4	0.000413859	0.000170211	74	41	0.0181772	0.11519	Cluster3	0.0579632
	1772	PWY.5676..acetyl.CoA.fermentation.to.butanoate.II	Cluster	Cluster6	2.3515e-05	1.06304e-05	74	8	0.0270435	0.16761	Cluster3	0.0822719
	1773	PWY.6936..seleno.amino.acid.biosynthesis..plants.	Cluster	Cluster4	0.000207093	9.05796e-05	74	45	0.0268174	0.16761	Cluster3	0.0816726
	1774	PWY.6270..isoprene.biosynthesis.I	Cluster	Cluster4	0.000335042	0.00014928	74	39	0.028373	0.173939	Cluster3	0.0856677
	1775	PWY.7560..methylerythritol.phosphate.pathway.II	Cluster	Cluster4	0.000321963	0.000144367	74	39	0.0293297	0.177871	Cluster3	0.0881775
	1776	COA.PWY.1..superpathway.of.coenzyme.A.biosynthesis.III..mammals.	Cluster	Cluster4	-0.000535931	0.000240761	74	63	0.0301173	0.180704	Cluster3	0.0904484
	1777	PWY.6700..queuosine.biosynthesis.I..de.novo.	Cluster	Cluster4	0.000371131	0.000169128	74	41	0.0319002	0.189386	Cluster3	0.0947551
	1778	ANAGLYCOLYSIS.PWY..glycolysis.III..from.glucose.	Cluster	Cluster4	0.000560599	0.000256232	74	43	0.0335938	0.19735	Cluster3	0.0987784
	1779	PWY.6902..chitin.degradation.II..Vibrio.	Cluster	Cluster6	1.6698e-05	7.19964e-06	74	13	0.0339415	0.19735	Cluster3	0.0996964
	1780	THISYNARA.PWY..superpathway.of.thiamine.diphosphate.biosynthesis.III..eukaryotes.	Cluster	Cluster4	0.000165169	7.66144e-05	74	39	0.0345345	0.19875	Cluster3	0.101227
	1781	PANTOSYN.PWY..superpathway.of.coenzyme.A.biosynthesis.I..bacteria.	Cluster	Cluster4	0.000349953	0.000162211	74	40	0.0353909	0.200199	Cluster3	0.103235
	1782	PWY.2942..L.lysine.biosynthesis.III	Cluster	Cluster4	0.000302257	0.00013989	74	48	0.0354964	0.200199	Cluster3	0.103399
	1783	PWY.5097..L.lysine.biosynthesis.VI	Cluster	Cluster4	0.000205227	9.58878e-05	74	46	0.0371336	0.20736	Cluster3	0.107169
	1784	PWY.7204..pyridoxal.5..phosphate.salvage.II..plants.	Cluster	Cluster6	2.87269e-05	1.38913e-05	74	8	0.0386811	0.21244	Cluster3	0.110952
	1785	PWY.724..superpathway.of.L.lysine..L.threonine.and.L.methionine.biosynthesis.II	Cluster	Cluster4	0.000187733	8.86282e-05	74	46	0.0387967	0.21244	Cluster3	0.11117
	1786	UNINTEGRATED	Cluster	Cluster4	-0.0222204	0.0106068	74	74	0.0409232	0.22193	Cluster3	0.11608
	1787	HSERMETANA.PWY..L.methionine.biosynthesis.III	Cluster	Cluster4	0.000226951	0.000108732	74	42	0.0420347	0.225787	Cluster3	0.118278
	1788	P124.PWY..Bifidobacterium.shunt	Cluster	Cluster4	0.00052302	0.000254563	74	43	0.0436609	0.225894	Cluster3	0.121878
	1789	PWY.5695..inosine.5..phosphate.degradation	Cluster	Cluster4	0.000425264	0.000205436	74	45	0.0440447	0.225894	Cluster3	0.122619
	1790	PWY.7198..pyrimidine.deoxyribonucleotides.de.novo.biosynthesis.IV	Cluster	Cluster4	0.000141596	6.85546e-05	74	42	0.0425845	0.225894	Cluster3	0.119585
	1791	PWY.7953..UDP.N.acetylmuramoyl.pentapeptide.biosynthesis.III..meso.diaminopimelate.containing.	Cluster	Cluster4	0.000617472	0.000297705	74	41	0.0436548	0.225894	Cluster3	0.121878
	1792	PWY.841..superpathway.of.purine.nucleotides.de.novo.biosynthesis.I	Cluster	Cluster4	0.000233172	0.000112955	74	39	0.0440574	0.225894	Cluster3	0.122619
	1793	PWY0.1061..superpathway.of.L.alanine.biosynthesis	Cluster	Cluster4	0.000435854	0.000212142	74	51	0.04513	0.229309	Cluster3	0.125233
	1794	PWY4LZ.257..superpathway.of.fermentation..Chlamydomonas.reinhardtii.	Cluster	Cluster6	4.02426e-05	2.04682e-05	74	8	0.0532533	0.268168	Cluster3	0.142431
	1795	PWY0.1296..purine.ribonucleosides.degradation	Cluster	Cluster4	0.000143664	7.3485e-05	74	39	0.0554162	0.274784	Cluster3	0.147514
	1796	THRESYN.PWY..superpathway.of.L.threonine.biosynthesis	Cluster	Cluster4	0.000353366	0.000181488	74	56	0.0555414	0.274784	Cluster3	0.147708
	1797	ASPASN.PWY..superpathway.of.L.aspartate.and.L.asparagine.biosynthesis	Cluster	Cluster4	0.000161709	8.32932e-05	74	46	0.0579966	0.277204	Cluster3	0.152791
	1798	CALVIN.PWY..Calvin.Benson.Bassham.cycle	Cluster	Cluster4	0.000320608	0.000165986	74	37	0.0575598	0.277204	Cluster3	0.151929
	1799	PWY.7357..thiamine.phosphate.formation.from.pyrithiamine.and.oxythiamine..yeast.	Cluster	Cluster4	0.000368421	0.000190815	74	43	0.057561	0.277204	Cluster3	0.151929
	1800	PWY0.162..superpathway.of.pyrimidine.ribonucleotides.de.novo.biosynthesis	Cluster	Cluster4	0.0003578	0.000184862	74	44	0.0573928	0.277204	Cluster3	0.15177
	1801	PWY.6125..superpathway.of.guanosine.nucleotides.de.novo.biosynthesis.II	Cluster	Cluster4	0.000149118	7.69206e-05	74	43	0.0586848	0.278136	Cluster3	0.153984
	1802	VALSYN.PWY..L.valine.biosynthesis	Cluster	Cluster4	0.000138832	7.32857e-05	74	40	0.0625862	0.294155	Cluster3	0.161849
	1803	PWY.7977..L.methionine.biosynthesis.IV	Cluster	Cluster6	5.47473e-05	2.91184e-05	74	13	0.0642472	0.299466	Cluster3	0.165405
	1804	FERMENTATION.PWY..mixed.acid.fermentation	Cluster	Cluster6	0.000119335	6.43267e-05	74	22	0.0690642	0.31928	Cluster3	0.175058
	1805	PWY.7663..gondoate.biosynthesis..anaerobic.	Cluster	Cluster6	0.000207984	0.000112107	74	41	0.0703014	0.319758	Cluster3	0.177394
	1806	PWY0.845..superpathway.of.pyridoxal.5..phosphate.biosynthesis.and.salvage	Cluster	Cluster6	6.58191e-05	3.57591e-05	74	18	0.0699147	0.319758	Cluster3	0.17679
	1807	ILEUSYN.PWY..L.isoleucine.biosynthesis.I..from.threonine.	Cluster	Cluster4	0.000123672	6.74339e-05	74	37	0.0713212	0.321801	Cluster3	0.179324
	1808	PWY.5103..L.isoleucine.biosynthesis.III	Cluster	Cluster4	0.000111782	6.12315e-05	74	37	0.0725596	0.324791	Cluster3	0.182112
	1809	PWY.7111..pyruvate.fermentation.to.isobutanol..engineered.	Cluster	Cluster4	0.000105223	5.78577e-05	74	37	0.0735959	0.326041	Cluster3	0.184383
	1810	PWY.7111..pyruvate.fermentation.to.isobutanol..engineered.	Cluster	Cluster6	0.0001336	7.34639e-05	74	37	0.0739952	0.326041	Cluster3	0.184561
	1811	ANAEROFRUCAT.PWY..homolactic.fermentation	Cluster	Cluster4	0.00022862	0.000126717	74	38	0.0755063	0.33012	Cluster3	0.187592
	1812	PWY.6703..preQ0.biosynthesis	Cluster	Cluster4	0.000189046	0.000104761	74	39	0.0766871	0.332704	Cluster3	0.189427
	1813	PYRIDNUCSYN.PWY..NAD.de.novo.biosynthesis.I..from.aspartate.	Cluster	Cluster4	0.000230271	0.000128521	74	38	0.0779715	0.335694	Cluster3	0.191589
	1814	PWY.7663..gondoate.biosynthesis..anaerobic.	Cluster	Cluster4	0.000160359	8.90845e-05	74	41	0.0788278	0.33681	Cluster3	0.193018
	1815	SER.GLYSYN.PWY..superpathway.of.L.serine.and.glycine.biosynthesis.I	Cluster	Cluster4	0.000154092	8.66089e-05	74	42	0.0795576	0.337372	Cluster3	0.194636
	1816	PYRIDOXSYN.PWY..pyridoxal.5..phosphate.biosynthesis.I	Cluster	Cluster6	5.86763e-05	3.3295e-05	74	19	0.0868859	0.365699	Cluster3	0.21073
	1817	PENTOSE.P.PWY..pentose.phosphate.pathway	Cluster	Cluster4	0.000258532	0.000149831	74	42	0.0888574	0.371226	Cluster3	0.214402
	1818	ARGSYN.PWY..L.arginine.biosynthesis.I..via.L.ornithine.	Cluster	Cluster6	6.02257e-05	3.51304e-05	74	16	0.0908901	0.375148	Cluster3	0.217625
	1819	PWY.5973..cis.vaccenate.biosynthesis	Cluster	Cluster4	0.000179101	0.000104681	74	44	0.0915246	0.375148	Cluster3	0.2184
	1820	PWY.8178..pentose.phosphate.pathway..non.oxidative.branch..II	Cluster	Cluster4	0.000201253	0.000117727	74	41	0.0917916	0.375148	Cluster3	0.218852
	1821	NONOXIPENT.PWY..pentose.phosphate.pathway..non.oxidative.branch..I	Cluster	Cluster4	0.00023643	0.00013924	74	43	0.0939514	0.381213	Cluster3	0.223433
	1822	PWY.6897..thiamine.diphosphate.salvage.II	Cluster	Cluster4	0.000194642	0.00011588	74	36	0.0974773	0.392694	Cluster3	0.229873
	1823	PWY.6588..pyruvate.fermentation.to.acetone	Cluster	Cluster6	2.08781e-05	1.26385e-05	74	14	0.0986232	0.394493	Cluster3	0.232278
	1824	BRANCHED.CHAIN.AA.SYN.PWY..superpathway.of.branched.chain.amino.acid.biosynthesis	Cluster	Cluster4	0.000104097	6.27894e-05	74	33	0.102919	0.405917	Cluster3	0.240286
	1825	PWY.5484..glycolysis.II..from.fructose.6.phosphate.	Cluster	Cluster4	0.000269666	0.000162352	74	39	0.102529	0.405917	Cluster3	0.239576
	1826	P441.PWY..superpathway.of.N.acetylneuraminate.degradation	Cluster	Cluster6	4.49192e-05	2.7354e-05	74	15	0.105045	0.411427	Cluster3	0.243833
	1827	PWY.6630..superpathway.of.L.tyrosine.biosynthesis	Cluster	Cluster4	0.0001768	0.000109125	74	35	0.110081	0.422352	Cluster3	0.25343
	1828	RIBOSYN2.PWY..flavin.biosynthesis.I..bacteria.and.plants.	Cluster	Cluster4	0.000156695	9.65388e-05	74	40	0.109658	0.422352	Cluster3	0.252869
	1829	TRNA.CHARGING.PWY..tRNA.charging	Cluster	Cluster2	0.000751696	0.000462605	74	70	0.108674	0.422352	Cluster3	0.250807
	1830	PWY.241..C4.photosynthetic.carbon.assimilation.cycle..NADP.ME.type	Cluster	Cluster4	0.000123575	7.80416e-05	74	36	0.118155	0.450266	Cluster3	0.268717
	1831	ASPASN.PWY..superpathway.of.L.aspartate.and.L.asparagine.biosynthesis	Cluster	Cluster6	0.000165456	0.000104834	74	46	0.12112	0.45541	Cluster3	0.272592
	1832	PWY.6823..molybdopterin.biosynthesis	Cluster	Cluster4	6.09263e-05	3.86799e-05	74	33	0.120429	0.45541	Cluster3	0.271988
	1833	PWY.1269..CMP.3.deoxy.D.manno.octulosonate.biosynthesis	Cluster	Cluster4	7.40475e-05	4.75962e-05	74	32	0.124478	0.461879	Cluster3	0.278811
	1834	PWY.5103..L.isoleucine.biosynthesis.III	Cluster	Cluster6	0.000121191	7.76949e-05	74	37	0.124107	0.461879	Cluster3	0.278423
	1835	PWY.6628..superpathway.of.L.phenylalanine.biosynthesis	Cluster	Cluster4	0.000191986	0.000123867	74	34	0.12629	0.465538	Cluster3	0.282194
	1836	PWY.7117..C4.photosynthetic.carbon.assimilation.cycle..PEPCK.type	Cluster	Cluster6	0.00014928	9.80105e-05	74	33	0.133115	0.487512	Cluster3	0.294231
	1837	PWY.8004..Entner.Doudoroff.pathway.I	Cluster	Cluster6	3.65415e-05	2.41201e-05	74	15	0.134279	0.488602	Cluster3	0.295813
	1838	PWY0.1298..superpathway.of.pyrimidine.deoxyribonucleosides.degradation	Cluster	Cluster4	5.23117e-05	3.44922e-05	74	33	0.135869	0.491218	Cluster3	0.297915
	1839	PWY.3001..superpathway.of.L.isoleucine.biosynthesis.I	Cluster	Cluster4	9.56494e-05	6.35476e-05	74	33	0.138076	0.496018	Cluster3	0.302048
	1840	GLYCOLYSIS.E.D..superpathway.of.glycolysis.and.the.Entner.Doudoroff.pathway	Cluster	Cluster6	4.34629e-05	2.91607e-05	74	15	0.140595	0.501339	Cluster3	0.305419
	1841	PWY.5659..GDP.mannose.biosynthesis	Cluster	Cluster4	0.000101019	6.78637e-05	74	33	0.141335	0.501339	Cluster3	0.306316
	1842	ARGSYNBSUB.PWY..L.arginine.biosynthesis.II..acetyl.cycle.	Cluster	Cluster6	4.31136e-05	2.93215e-05	74	18	0.14594	0.514439	Cluster3	0.314269
	1843	PWY.7115..C4.photosynthetic.carbon.assimilation.cycle..NAD.ME.type	Cluster	Cluster6	4.81302e-05	3.27136e-05	74	32	0.147556	0.516903	Cluster3	0.317109
	1844	VALSYN.PWY..L.valine.biosynthesis	Cluster	Cluster6	0.000136099	9.31949e-05	74	40	0.149371	0.520032	Cluster3	0.320032
	1845	PWY.6386..UDP.N.acetylmuramoyl.pentapeptide.biosynthesis.II..lysine.containing.	Cluster	Cluster2	0.000451522	0.000319893	74	71	0.163488	0.56569	Cluster3	0.344475
	1846	CITRULBIO.PWY..L.citrulline.biosynthesis	Cluster	Cluster6	3.06148e-05	2.17753e-05	74	16	0.165717	0.56645	Cluster3	0.347894
	1847	PWY.5913..partial.TCA.cycle..obligate.autotrophs.	Cluster	Cluster6	0.000119499	8.48713e-05	74	21	0.164725	0.56645	Cluster3	0.34633
	1848	PWY.7117..C4.photosynthetic.carbon.assimilation.cycle..PEPCK.type	Cluster	Cluster4	0.000107872	7.72519e-05	74	33	0.167448	0.56892	Cluster3	0.351004
	1849	PWY.7328..superpathway.of.UDP.glucose.derived.O.antigen.building.blocks.biosynthesis	Cluster	Cluster4	6.30972e-05	4.58576e-05	74	31	0.175253	0.591873	Cluster3	0.364402
	1850	PWY.5188..tetrapyrrole.biosynthesis.I..from.glutamate.	Cluster	Cluster4	8.29663e-05	6.0929e-05	74	35	0.177821	0.596972	Cluster3	0.368354
	1851	BRANCHED.CHAIN.AA.SYN.PWY..superpathway.of.branched.chain.amino.acid.biosynthesis	Cluster	Cluster6	0.000107591	7.90818e-05	74	33	0.179301	0.598378	Cluster3	0.369513
	1852	ILEUSYN.PWY..L.isoleucine.biosynthesis.I..from.threonine.	Cluster	Cluster6	0.000115049	8.54884e-05	74	37	0.183506	0.608808	Cluster3	0.376247
	1853	PWY.5981..CDP.diacylglycerol.biosynthesis.III	Cluster	Cluster2	0.000188969	0.000142121	74	25	0.18955	0.625183	Cluster3	0.385443
	1854	PWY0.862...5Z..dodecenoate.biosynthesis.I	Cluster	Cluster6	2.51698e-05	1.9466e-05	74	11	0.196412	0.644049	Cluster3	0.395497
	1855	HEMESYN2.PWY..heme.b.biosynthesis.II..oxygen.independent.	Cluster	Cluster6	6.1369e-05	4.71728e-05	74	26	0.198542	0.647269	Cluster3	0.398644
	1856	PEPTIDOGLYCANSYN.PWY..peptidoglycan.biosynthesis.I..meso.diaminopimelate.containing.	Cluster	Cluster2	0.00041446	0.000319674	74	71	0.199902	0.64796	Cluster3	0.400232
	1857	NONOXIPENT.PWY..pentose.phosphate.pathway..non.oxidative.branch..I	Cluster	Cluster6	0.000232298	0.000181291	74	43	0.204439	0.655133	Cluster3	0.407862
	1858	PWY66.429..fatty.acid.biosynthesis.initiation..mitochondria.	Cluster	Cluster4	9.43593e-05	7.31564e-05	74	42	0.203419	0.655133	Cluster3	0.406115
	1859	GLCMANNANAUT.PWY..superpathway.of.N.acetylglucosamine..N.acetylmannosamine.and.N.acetylneuraminate.degradation	Cluster	Cluster6	0.000127067	0.000100145	74	34	0.20992	0.666778	Cluster3	0.417907
	1860	PWY.7115..C4.photosynthetic.carbon.assimilation.cycle..NAD.ME.type	Cluster	Cluster4	3.29716e-05	2.59688e-05	74	32	0.210437	0.666778	Cluster3	0.41864
	1861	COLANSYN.PWY..colanic.acid.building.blocks.biosynthesis	Cluster	Cluster4	7.011e-05	5.58532e-05	74	29	0.215126	0.670339	Cluster3	0.423466
	1862	PHOSLIPSYN.PWY..superpathway.of.phospholipid.biosynthesis.I..bacteria.	Cluster	Cluster4	5.82117e-05	4.63194e-05	74	29	0.215102	0.670339	Cluster3	0.423466
	1863	PWY.5989..stearate.biosynthesis.II..bacteria.and.plants.	Cluster	Cluster6	5.80168e-05	4.59453e-05	74	22	0.212868	0.670339	Cluster3	0.420725
	1864	PWY.5005..biotin.biosynthesis.II	Cluster	Cluster4	2.27724e-05	1.84697e-05	74	19	0.221891	0.680144	Cluster3	0.433455
	1865	PWY.5189..tetrapyrrole.biosynthesis.II..from.glycine.	Cluster	Cluster4	6.04608e-05	4.88489e-05	74	33	0.220036	0.680144	Cluster3	0.431025
	1866	PWY.6387..UDP.N.acetylmuramoyl.pentapeptide.biosynthesis.I..meso.diaminopimelate.containing.	Cluster	Cluster2	0.00040986	0.000331393	74	72	0.221089	0.680144	Cluster3	0.432486
	1867	PWY.6608..guanosine.nucleotides.degradation.III	Cluster	Cluster6	0.000148644	0.000122928	74	36	0.232549	0.708961	Cluster3	0.449454
	1868	PWY.6608..guanosine.nucleotides.degradation.III	Cluster	Cluster4	0.000117197	9.76867e-05	74	36	0.236151	0.71224	Cluster3	0.453429
	1869	TRNA.CHARGING.PWY..tRNA.charging	Cluster	Cluster4	-0.000539967	0.000451149	74	70	0.235395	0.71224	Cluster3	0.452919
	1870	P41.PWY..pyruvate.fermentation.to.acetate.and..S..lactate.I	Cluster	Cluster4	-0.000374595	0.000313978	74	70	0.238592	0.71329	Cluster3	0.456564
	1871	PWY.5100..pyruvate.fermentation.to.acetate.and.lactate.II	Cluster	Cluster4	-0.000374523	0.000314221	74	71	0.239028	0.71329	Cluster3	0.45708
	1872	PWY.6609..adenine.and.adenosine.salvage.III	Cluster	Cluster4	0.000438508	0.000371766	74	43	0.244669	0.726282	Cluster3	0.463454
	1873	PWY.6151..S.adenosyl.L.methionine.salvage.I	Cluster	Cluster2	0.000350322	0.000298677	74	61	0.246167	0.726903	Cluster3	0.465664
	1874	PWY.8178..pentose.phosphate.pathway..non.oxidative.branch..II	Cluster	Cluster6	0.000175369	0.000152612	74	41	0.254604	0.747898	Cluster3	0.476809
	1875	PWY0.1241..ADP.L.glycero..beta..D.manno.heptose.biosynthesis	Cluster	Cluster6	1.14512e-05	1.00865e-05	74	8	0.257115	0.751363	Cluster3	0.479596
	1876	NAGLIPASYN.PWY..lipid.IVA.biosynthesis..E..coli.	Cluster	Cluster4	8.85064e-05	7.81491e-05	74	29	0.263967	0.759579	Cluster3	0.490748
	1877	PWY.8073..lipid.IVA.biosynthesis..P..putida.	Cluster	Cluster4	8.85064e-05	7.81491e-05	74	29	0.263967	0.759579	Cluster3	0.490748
	1878	PWY0.1297..superpathway.of.purine.deoxyribonucleosides.degradation	Cluster	Cluster4	4.88149e-05	4.32074e-05	74	27	0.263874	0.759579	Cluster3	0.490748
	1879	PWY.2941..L.lysine.biosynthesis.II	Cluster	Cluster4	8.77338e-05	7.79237e-05	74	36	0.265807	0.760991	Cluster3	0.492541
	1880	HEME.BIOSYNTHESIS.II..heme.b.biosynthesis.I..aerobic.	Cluster	Cluster6	4.03662e-05	3.68341e-05	74	26	0.277593	0.786975	Cluster3	0.507504
	1881	PWY.7851..coenzyme.A.biosynthesis.II..eukaryotic.	Cluster	Cluster2	0.000224298	0.000205012	74	71	0.277674	0.786975	Cluster3	0.507504
	1882	PWY0.1319..CDP.diacylglycerol.biosynthesis.II	Cluster	Cluster4	0.000216765	0.000198804	74	64	0.279301	0.787628	Cluster3	0.509547
	1883	UNINTEGRATED	Cluster	Cluster6	0.0144787	0.0133684	74	74	0.283936	0.792773	Cluster3	0.515931
	1884	X1CMET2.PWY..folate.transformations.III..E..coli.	Cluster	Cluster6	4.39546e-05	4.05126e-05	74	14	0.283134	0.792773	Cluster3	0.515082
	1885	PWY.5667..CDP.diacylglycerol.biosynthesis.I	Cluster	Cluster4	0.000212863	0.000199217	74	63	0.288966	0.802841	Cluster3	0.523716
	1886	PWY.6527..stachyose.degradation	Cluster	Cluster2	8.80893e-05	8.4225e-05	74	47	0.299215	0.827241	Cluster3	0.539162
	1887	HISDEG.PWY..L.histidine.degradation.I	Cluster	Cluster4	8.6766e-05	8.31648e-05	74	33	0.302877	0.829235	Cluster3	0.544365
	1888	PWY.7282..4.amino.2.methyl.5.diphosphomethylpyrimidine.biosynthesis.II	Cluster	Cluster6	5.64628e-05	5.41196e-05	74	23	0.3021	0.829235	Cluster3	0.543663
	1889	PWY.6936..seleno.amino.acid.biosynthesis..plants.	Cluster	Cluster6	0.000117231	0.000114164	74	45	0.30948	0.84322	Cluster3	0.554107
	1890	PWY.6527..stachyose.degradation	Cluster	Cluster4	8.23734e-05	8.21394e-05	74	47	0.319388	0.866032	Cluster3	0.565009
	1891	PWY.1269..CMP.3.deoxy.D.manno.octulosonate.biosynthesis	Cluster	Cluster6	6.01741e-05	6.06995e-05	74	32	0.32537	0.869057	Cluster3	0.573786
	1892	PWY.5030..L.histidine.degradation.III	Cluster	Cluster4	7.75629e-05	7.8447e-05	74	31	0.327069	0.869057	Cluster3	0.574759
	1893	PWY.6386..UDP.N.acetylmuramoyl.pentapeptide.biosynthesis.II..lysine.containing.	Cluster	Cluster4	-0.000310688	0.000316066	74	71	0.330264	0.869057	Cluster3	0.579147
	1894	PWY.6387..UDP.N.acetylmuramoyl.pentapeptide.biosynthesis.I..meso.diaminopimelate.containing.	Cluster	Cluster4	-0.000322733	0.000327933	74	72	0.329589	0.869057	Cluster3	0.578323
	1895	PWY.6901..superpathway.of.glucose.and.xylose.degradation	Cluster	Cluster4	4.21404e-05	4.30746e-05	74	21	0.331289	0.869057	Cluster3	0.580164
	1896	PWY.7282..4.amino.2.methyl.5.diphosphomethylpyrimidine.biosynthesis.II	Cluster	Cluster4	4.2594e-05	4.30029e-05	74	23	0.327045	0.869057	Cluster3	0.574759
	1897	UDPNAGSYN.PWY..UDP.N.acetyl.D.glucosamine.biosynthesis.I	Cluster	Cluster4	-0.000342445	0.000345321	74	72	0.325673	0.869057	Cluster3	0.573795
	1898	GLUCONEO.PWY..gluconeogenesis.I	Cluster	Cluster4	5.73247e-05	5.89428e-05	74	24	0.334127	0.872443	Cluster3	0.583736
	1899	PWY.6901..superpathway.of.glucose.and.xylose.degradation	Cluster	Cluster6	5.2555e-05	5.44856e-05	74	21	0.338082	0.878702	Cluster3	0.587361
	1900	PWY.4041...gamma..glutamyl.cycle	Cluster	Cluster4	2.63996e-05	2.74913e-05	74	32	0.340216	0.880191	Cluster3	0.58953
	1901	PWY0.1298..superpathway.of.pyrimidine.deoxyribonucleosides.degradation	Cluster	Cluster6	4.09909e-05	4.34101e-05	74	33	0.349642	0.900448	Cluster3	0.601128
	1902	PHOSLIPSYN.PWY..superpathway.of.phospholipid.biosynthesis.I..bacteria.	Cluster	Cluster6	5.4721e-05	5.83003e-05	74	29	0.352654	0.903981	Cluster3	0.605566
	1903	PWY0.1297..superpathway.of.purine.deoxyribonucleosides.degradation	Cluster	Cluster6	5.08388e-05	5.43717e-05	74	27	0.354219	0.903981	Cluster3	0.606515
	1904	POLYISOPRENSYN.PWY..polyisoprenoid.biosynthesis..E..coli.	Cluster	Cluster4	5.25225e-05	5.68116e-05	74	23	0.359773	0.914019	Cluster3	0.614039
	1905	PWY0.1296..purine.ribonucleosides.degradation	Cluster	Cluster6	8.52386e-05	9.27037e-05	74	39	0.361899	0.915297	Cluster3	0.616545
	1906	HEME.BIOSYNTHESIS.II..heme.b.biosynthesis.I..aerobic.	Cluster	Cluster4	2.64241e-05	2.90539e-05	74	26	0.366527	0.920317	Cluster3	0.622166
	1907	PWY.5189..tetrapyrrole.biosynthesis.II..from.glycine.	Cluster	Cluster6	5.69233e-05	6.26702e-05	74	33	0.367148	0.920317	Cluster3	0.622844
	1908	GLUCOSE1PMETAB.PWY..glucose.and.glucose.1.phosphate.degradation	Cluster	Cluster4	0.000226359	0.000252807	74	15	0.375271	0.925032	Cluster3	0.633218
	1909	PWY.7323..superpathway.of.GDP.mannose.derived.O.antigen.building.blocks.biosynthesis	Cluster	Cluster6	2.90668e-05	3.23956e-05	74	20	0.375445	0.925032	Cluster3	0.633218
	1910	PWY4FS.7..phosphatidylglycerol.biosynthesis.I..plastidic.	Cluster	Cluster2	9.0916e-05	0.000101772	74	34	0.375586	0.925032	Cluster3	0.633218
	1911	PWY4FS.8..phosphatidylglycerol.biosynthesis.II..non.plastidic.	Cluster	Cluster2	9.09156e-05	0.000101772	74	34	0.375589	0.925032	Cluster3	0.633218
	1912	PWY.5918..superpathway.of.heme.b.biosynthesis.from.glutamate	Cluster	Cluster4	3.51473e-05	4.05366e-05	74	23	0.389073	0.954076	Cluster3	0.652075
	1913	PWY.6147..6.hydroxymethyl.dihydropterin.diphosphate.biosynthesis.I	Cluster	Cluster4	0.000201649	0.00023528	74	61	0.395814	0.966403	Cluster3	0.659143
	1914	PWY.6969..TCA.cycle.V..2.oxoglutarate.synthase.	Cluster	Cluster6	4.98348e-05	5.89554e-05	74	22	0.401824	0.976849	Cluster3	0.66757
	1915	UNINTEGRATED	Cluster	Cluster2	-0.00885654	0.0106671	74	74	0.40964	0.978971	Cluster3	0.67497
	1916	PEPTIDOGLYCANSYN.PWY..peptidoglycan.biosynthesis.I..meso.diaminopimelate.containing.	Cluster	Cluster4	-0.000263597	0.000316291	74	71	0.408454	0.978971	Cluster3	0.67389
	1917	PWY.5188..tetrapyrrole.biosynthesis.I..from.glutamate.	Cluster	Cluster6	6.4748e-05	7.78574e-05	74	35	0.408805	0.978971	Cluster3	0.673989
	1918	PWY.6969..TCA.cycle.V..2.oxoglutarate.synthase.	Cluster	Cluster4	3.90327e-05	4.67467e-05	74	22	0.407309	0.978971	Cluster3	0.67389
	1919	FERMENTATION.PWY..mixed.acid.fermentation	Cluster	Cluster4	4.15777e-05	5.1062e-05	74	22	0.418946	0.9822	Cluster3	0.683889
	1920	HEMESYN2.PWY..heme.b.biosynthesis.II..oxygen.independent.	Cluster	Cluster4	3.0227e-05	3.73121e-05	74	26	0.421029	0.9822	Cluster3	0.685299
	1921	PWY.3001..superpathway.of.L.isoleucine.biosynthesis.I	Cluster	Cluster6	6.47106e-05	7.99695e-05	74	33	0.42196	0.9822	Cluster3	0.686418
	1922	PWY.5989..stearate.biosynthesis.II..bacteria.and.plants.	Cluster	Cluster4	2.9499e-05	3.65064e-05	74	22	0.423182	0.9822	Cluster3	0.686804
	1923	PWY.7383..anaerobic.energy.metabolism..invertebrates..cytosol.	Cluster	Cluster4	3.40656e-05	4.17339e-05	74	18	0.418102	0.9822	Cluster3	0.682908
	1924	PWY66.389..phytol.degradation	Cluster	Cluster4	1.10238e-05	1.345e-05	74	27	0.412821	0.9822	Cluster3	0.678245
	1925	PWY66.409..superpathway.of.purine.nucleotide.salvage	Cluster	Cluster4	5.3391e-05	6.51288e-05	74	23	0.415233	0.9822	Cluster3	0.68124
	1926	PWY.621..sucrose.degradation.III..sucrose.invertase.	Cluster	Cluster4	3.51214e-05	4.39714e-05	74	25	0.427723	0.98867	Cluster3	0.690932
	1927	PPGPPMET.PWY..ppGpp.metabolism	Cluster	Cluster4	1.75204e-05	2.20664e-05	74	19	0.431392	0.993082	Cluster3	0.696121
	1928	PWY0.301..L.ascorbate.degradation.I..bacterial..anaerobic.	Cluster	Cluster4	3.17016e-05	4.03352e-05	74	21	0.434599	0.996397	Cluster3	0.699689
	1929	X1CMET2.PWY..folate.transformations.III..E..coli.	Cluster	Cluster4	1.8786e-05	3.21362e-05	74	14	0.56162	1	Cluster3	0.817563
	1930	X1CMET2.PWY..folate.transformations.III..E..coli.	Cluster	Cluster2	5.2312e-06	3.28011e-05	74	14	0.873897	1	Cluster3	0.990136
	1931	ANAEROFRUCAT.PWY..homolactic.fermentation	Cluster	Cluster2	3.86397e-05	0.000129935	74	38	0.767059	1	Cluster3	0.948616
	1932	ANAEROFRUCAT.PWY..homolactic.fermentation	Cluster	Cluster6	4.02865e-05	0.000160286	74	38	0.802287	1	Cluster3	0.963773
	1933	ANAGLYCOLYSIS.PWY..glycolysis.III..from.glucose.	Cluster	Cluster2	-2.7376e-06	0.000258613	74	43	0.991592	1	Cluster3	1
	1934	ANAGLYCOLYSIS.PWY..glycolysis.III..from.glucose.	Cluster	Cluster6	9.41799e-05	0.000322578	74	43	0.771626	1	Cluster3	0.949535
	1935	ARGSYN.PWY..L.arginine.biosynthesis.I..via.L.ornithine.	Cluster	Cluster4	1.86121e-05	2.7773e-05	74	16	0.504967	1	Cluster3	0.769357
	1936	ARGSYN.PWY..L.arginine.biosynthesis.I..via.L.ornithine.	Cluster	Cluster2	5.76858e-06	2.84782e-05	74	16	0.840066	1	Cluster3	0.978102
	1937	ARGSYNBSUB.PWY..L.arginine.biosynthesis.II..acetyl.cycle.	Cluster	Cluster4	1.50759e-05	2.31806e-05	74	18	0.517585	1	Cluster3	0.780542
	1938	ARGSYNBSUB.PWY..L.arginine.biosynthesis.II..acetyl.cycle.	Cluster	Cluster2	6.51253e-06	2.37692e-05	74	18	0.784899	1	Cluster3	0.953892
	1939	ARO.PWY..chorismate.biosynthesis.I	Cluster	Cluster2	2.0775e-05	0.000259981	74	45	0.93657	1	Cluster3	1
	1940	ARO.PWY..chorismate.biosynthesis.I	Cluster	Cluster6	0.000111469	0.00032459	74	45	0.73264	1	Cluster3	0.931457
	1941	ASPASN.PWY..superpathway.of.L.aspartate.and.L.asparagine.biosynthesis	Cluster	Cluster2	9.10622e-06	8.41797e-05	74	46	0.914241	1	Cluster3	1
	1942	BRANCHED.CHAIN.AA.SYN.PWY..superpathway.of.branched.chain.amino.acid.biosynthesis	Cluster	Cluster2	3.67151e-06	6.32691e-05	74	33	0.953911	1	Cluster3	1
	1943	CALVIN.PWY..Calvin.Benson.Bassham.cycle	Cluster	Cluster2	4.52432e-06	0.000163868	74	37	0.978052	1	Cluster3	1
	1944	CALVIN.PWY..Calvin.Benson.Bassham.cycle	Cluster	Cluster6	0.00014462	0.000212752	74	37	0.499144	1	Cluster3	0.763797
	1945	CITRULBIO.PWY..L.citrulline.biosynthesis	Cluster	Cluster4	8.98559e-06	1.72693e-05	74	16	0.60519	1	Cluster3	0.856591
	1946	CITRULBIO.PWY..L.citrulline.biosynthesis	Cluster	Cluster2	5.40565e-06	1.76338e-05	74	16	0.760361	1	Cluster3	0.943744
	1947	COA.PWY..coenzyme.A.biosynthesis.I..prokaryotic.	Cluster	Cluster2	6.39508e-05	0.00020502	74	71	0.756024	1	Cluster3	0.942673
	1948	COLANSYN.PWY..colanic.acid.building.blocks.biosynthesis	Cluster	Cluster2	3.23033e-06	5.63845e-05	74	29	0.95451	1	Cluster3	1
	1949	COLANSYN.PWY..colanic.acid.building.blocks.biosynthesis	Cluster	Cluster6	4.2651e-05	7.03116e-05	74	29	0.5469	1	Cluster3	0.807566
	1950	COMPLETE.ARO.PWY..superpathway.of.aromatic.amino.acid.biosynthesis	Cluster	Cluster2	1.03536e-05	0.000171115	74	41	0.951943	1	Cluster3	1
	1951	COMPLETE.ARO.PWY..superpathway.of.aromatic.amino.acid.biosynthesis	Cluster	Cluster6	9.00888e-05	0.000214564	74	41	0.676223	1	Cluster3	0.906468
	1952	DTDPRHAMSYN.PWY..dTDP..beta..L.rhamnose.biosynthesis	Cluster	Cluster2	5.52708e-05	0.000170103	74	48	0.746366	1	Cluster3	0.937879
	1953	DTDPRHAMSYN.PWY..dTDP..beta..L.rhamnose.biosynthesis	Cluster	Cluster6	6.23508e-05	0.00021112	74	48	0.76885	1	Cluster3	0.949275
	1954	FASYN.ELONG.PWY..fatty.acid.elongation....saturated	Cluster	Cluster4	4.81991e-06	2.07989e-05	74	8	0.817418	1	Cluster3	0.97191
	1955	FASYN.ELONG.PWY..fatty.acid.elongation....saturated	Cluster	Cluster2	6.74392e-21	2.13271e-05	74	8	1	1	Cluster3	1
	1956	FERMENTATION.PWY..mixed.acid.fermentation	Cluster	Cluster2	3.72933e-06	5.14156e-05	74	22	0.942411	1	Cluster3	1
	1957	GLCMANNANAUT.PWY..superpathway.of.N.acetylglucosamine..N.acetylmannosamine.and.N.acetylneuraminate.degradation	Cluster	Cluster4	4.7949e-05	7.93738e-05	74	34	0.54815	1	Cluster3	0.808052
	1958	GLCMANNANAUT.PWY..superpathway.of.N.acetylglucosamine..N.acetylmannosamine.and.N.acetylneuraminate.degradation	Cluster	Cluster2	3.04006e-05	7.96501e-05	74	34	0.70397	1	Cluster3	0.919972
	1959	GLUCONEO.PWY..gluconeogenesis.I	Cluster	Cluster2	1.69582e-05	6.04395e-05	74	24	0.779859	1	Cluster3	0.95321
	1960	GLUCONEO.PWY..gluconeogenesis.I	Cluster	Cluster6	4.6321e-05	7.45574e-05	74	24	0.536434	1	Cluster3	0.797839
	1961	GLUCOSE1PMETAB.PWY..glucose.and.glucose.1.phosphate.degradation	Cluster	Cluster2	2.79564e-06	0.000257866	74	15	0.991392	1	Cluster3	1
	1962	GLUCOSE1PMETAB.PWY..glucose.and.glucose.1.phosphate.degradation	Cluster	Cluster6	0.000163666	0.000318597	74	15	0.609789	1	Cluster3	0.860933
	1963	GLUTORN.PWY..L.ornithine.biosynthesis.I	Cluster	Cluster4	4.93531e-06	1.49163e-05	74	17	0.741734	1	Cluster3	0.935907
	1964	GLUTORN.PWY..L.ornithine.biosynthesis.I	Cluster	Cluster2	4.00285e-06	1.52951e-05	74	17	0.794315	1	Cluster3	0.960426
	1965	GLYCOCAT.PWY..glycogen.degradation.I	Cluster	Cluster4	2.40915e-05	7.59214e-05	74	9	0.752237	1	Cluster3	0.941234
	1966	GLYCOCAT.PWY..glycogen.degradation.I	Cluster	Cluster2	1.94945e-06	7.75874e-05	74	9	0.980041	1	Cluster3	1
	1967	GLYCOCAT.PWY..glycogen.degradation.I	Cluster	Cluster6	2.65128e-05	9.57775e-05	74	9	0.782938	1	Cluster3	0.953683
	1968	GLYCOGENSYNTH.PWY..glycogen.biosynthesis.I..from.ADP.D.Glucose.	Cluster	Cluster2	2.37832e-05	0.000266774	74	48	0.929273	1	Cluster3	1
	1969	GLYCOGENSYNTH.PWY..glycogen.biosynthesis.I..from.ADP.D.Glucose.	Cluster	Cluster6	0.000138346	0.00032983	74	48	0.676553	1	Cluster3	0.906478
	1970	GLYCOLYSIS.E.D..superpathway.of.glycolysis.and.the.Entner.Doudoroff.pathway	Cluster	Cluster4	1.67337e-05	2.30536e-05	74	15	0.470342	1	Cluster3	0.736564
	1971	GLYCOLYSIS.E.D..superpathway.of.glycolysis.and.the.Entner.Doudoroff.pathway	Cluster	Cluster2	3.12695e-06	2.36389e-05	74	15	0.895143	1	Cluster3	1
	1972	HEME.BIOSYNTHESIS.II..heme.b.biosynthesis.I..aerobic.	Cluster	Cluster2	8.00687e-07	2.89578e-05	74	26	0.978023	1	Cluster3	1
	1973	HEMESYN2.PWY..heme.b.biosynthesis.II..oxygen.independent.	Cluster	Cluster2	1.46473e-06	3.73183e-05	74	26	0.96881	1	Cluster3	1
	1974	HISDEG.PWY..L.histidine.degradation.I	Cluster	Cluster2	6.94193e-06	8.45835e-05	74	33	0.934926	1	Cluster3	1
	1975	HISDEG.PWY..L.histidine.degradation.I	Cluster	Cluster6	1.25417e-05	0.000104701	74	33	0.90521	1	Cluster3	1
	1976	HISTSYN.PWY..L.histidine.biosynthesis	Cluster	Cluster4	2.4617e-06	6.42148e-06	74	9	0.703178	1	Cluster3	0.919365
	1977	HISTSYN.PWY..L.histidine.biosynthesis	Cluster	Cluster2	8.28305e-07	6.58453e-06	74	9	0.900428	1	Cluster3	1
	1978	HSERMETANA.PWY..L.methionine.biosynthesis.III	Cluster	Cluster2	2.10861e-06	0.000109982	74	42	0.984771	1	Cluster3	1
	1979	HSERMETANA.PWY..L.methionine.biosynthesis.III	Cluster	Cluster6	1.30382e-05	0.000136837	74	42	0.924481	1	Cluster3	1
	1980	ILEUSYN.PWY..L.isoleucine.biosynthesis.I..from.threonine.	Cluster	Cluster2	3.84394e-06	6.72136e-05	74	37	0.954562	1	Cluster3	1
	1981	LACTOSECAT.PWY..lactose.and.galactose.degradation.I	Cluster	Cluster4	4.70519e-05	0.000245746	74	51	0.849003	1	Cluster3	0.980181
	1982	LACTOSECAT.PWY..lactose.and.galactose.degradation.I	Cluster	Cluster6	-7.56559e-05	0.000310626	74	51	0.808559	1	Cluster3	0.967027
	1983	NAGLIPASYN.PWY..lipid.IVA.biosynthesis..E..coli.	Cluster	Cluster2	-2.00995e-06	7.94364e-05	74	29	0.979917	1	Cluster3	1
	1984	NAGLIPASYN.PWY..lipid.IVA.biosynthesis..E..coli.	Cluster	Cluster6	4.85258e-05	9.83735e-05	74	29	0.624345	1	Cluster3	0.872717
	1985	NONMEVIPP.PWY..methylerythritol.phosphate.pathway.I	Cluster	Cluster2	1.48814e-05	0.000174599	74	41	0.932387	1	Cluster3	1
	1986	NONMEVIPP.PWY..methylerythritol.phosphate.pathway.I	Cluster	Cluster6	4.85183e-05	0.000215775	74	41	0.822976	1	Cluster3	0.97266
	1987	NONOXIPENT.PWY..pentose.phosphate.pathway..non.oxidative.branch..I	Cluster	Cluster2	1.18758e-05	0.000136208	74	43	0.930774	1	Cluster3	1
	1988	OANTIGEN.PWY..O.antigen.building.blocks.biosynthesis..E..coli.	Cluster	Cluster2	8.18341e-05	0.000196177	74	47	0.678149	1	Cluster3	0.907028
	1989	OANTIGEN.PWY..O.antigen.building.blocks.biosynthesis..E..coli.	Cluster	Cluster6	5.87652e-05	0.000242627	74	47	0.809556	1	Cluster3	0.967544
	1990	P124.PWY..Bifidobacterium.shunt	Cluster	Cluster2	-2.45734e-05	0.000249906	74	43	0.921952	1	Cluster3	1
	1991	P124.PWY..Bifidobacterium.shunt	Cluster	Cluster6	0.000155464	0.000329217	74	43	0.638323	1	Cluster3	0.88398
	1992	P164.PWY..purine.nucleobases.degradation.I..anaerobic.	Cluster	Cluster4	5.29109e-05	9.25958e-05	74	32	0.570001	1	Cluster3	0.824211
	1993	P164.PWY..purine.nucleobases.degradation.I..anaerobic.	Cluster	Cluster2	3.08639e-05	9.34289e-05	74	32	0.742258	1	Cluster3	0.935907
	1994	P164.PWY..purine.nucleobases.degradation.I..anaerobic.	Cluster	Cluster6	-2.82454e-06	0.000116579	74	32	0.980759	1	Cluster3	1
[truncated: 817 more rows]

## Sheet: 4. MaAsLin2 - gene families
Supplementary Table 4: MaAsLin2 analysis of gene families
Input feature table: Gene family relative abundance from HUMAnN3
MaAsLin2 comparing gene families between microbiome community clusters														MaAsLin2 comparing functional pathways between shedders/non-shedders and over time													MaAsLin2 comparing functional pathways between discordant and non-discordant timepoints among shedders
Model structure: fixed effects = Cluster, random effects = Patient ID														Model structure: fixed effects = Shedder/non-shedder status & time, random effects = Patient ID													Model structure: fixed effects = Discordant/non-discordant timepoint, random effects = Patient ID
Repeat model with each cluster as reference and readjust p values for multiple comparisons. Only significant results are shown.														Subset the results for the two fixed effects and readjust the q values separately.
Results:		feature	metadata	value	coef	stderr	N	N.not.0	pval	qval	reference	qval.readjust		Results:		feature	metadata	value	coef	stderr	N	N.not.0	pval	qval	qval.readjust		Results:	feature	metadata	value	coef	stderr	N	N.not.0	pval	qval
	1	UniRef90_A0A0R1RZX8	Cluster	C3	0.00054592	1.06978e-05	125	24	0	0	C1	0			1	UniRef90_A0A0E3UTE8	Days_since_visit1	Days_since_visit1	-5.51877e-06	1.85885e-06	125	36	0.00376314	0.515434	0.501693			UNINTEGRATED	DSC_all	not_DSC	-0.00743552	0.00539668	35	35	0.180345	0.806726
	2	UniRef90_A0A0R1S0Z4	Cluster	C3	0.000585813	1.18864e-05	125	23	0	0	C1	0			2	UniRef90_A0A0E3UTE9	Days_since_visit1	Days_since_visit1	-5.22398e-06	1.72204e-06	125	36	0.0031013	0.515434	0.501693			ANAGLYCOLYSIS.PWY..glycolysis.III..from.glucose.	DSC_all	not_DSC	-0.000128639	0.000153491	35	18	0.409516	0.806726
	3	UniRef90_A0A0R1S3A4	Cluster	C3	0.000376008	9.21906e-06	125	19	0	0	C1	0			3	UniRef90_A0A0E3UTH5	Days_since_visit1	Days_since_visit1	-4.68051e-06	1.55072e-06	125	33	0.0026128	0.515434	0.501693			ARGSYN.PWY..L.arginine.biosynthesis.I..via.L.ornithine.	DSC_all	not_DSC	-6.42788e-05	4.62017e-05	35	5	0.175523	0.806726
	4	UniRef90_A0A0R1S428	Cluster	C3	0.00043479	9.96173e-06	125	22	0	0	C1	0			4	UniRef90_A0A0E3UTI3	Days_since_visit1	Days_since_visit1	-4.88687e-06	1.56208e-06	125	33	0.00181537	0.515434	0.501693			ARGSYNBSUB.PWY..L.arginine.biosynthesis.II..acetyl.cycle.	DSC_all	not_DSC	-6.4763e-05	4.53005e-05	35	5	0.164264	0.806726
	5	UniRef90_A0A0R1S6Q3	Cluster	C3	0.000496385	1.09915e-05	125	22	0	0	C1	0			5	UniRef90_A0A0E3UTI8	Days_since_visit1	Days_since_visit1	-5.47202e-06	1.78431e-06	125	34	0.00280379	0.515434	0.501693			ARO.PWY..chorismate.biosynthesis.I	DSC_all	not_DSC	0.000196419	0.000149077	35	20	0.199031	0.806726
	6	UniRef90_A0A0R1S8D6	Cluster	C3	0.000466082	1.08381e-05	125	21	0	0	C1	0			6	UniRef90_A0A0E3UTJ4	Days_since_visit1	Days_since_visit1	-4.56401e-06	1.28637e-06	125	28	0.000392335	0.515434	0.501693			BRANCHED.CHAIN.AA.SYN.PWY..superpathway.of.branched.chain.amino.acid.biosynthesis	DSC_all	not_DSC	-6.15443e-05	5.91137e-05	35	14	0.307114	0.806726
	7	UniRef90_A0A0R1S8E0	Cluster	C3	0.000396206	1.01502e-05	125	20	0	0	C1	0			7	UniRef90_A0A0E3UTK0	Days_since_visit1	Days_since_visit1	-5.67897e-06	1.7977e-06	125	30	0.00211064	0.515434	0.501693			CITRULBIO.PWY..L.citrulline.biosynthesis	DSC_all	not_DSC	5.2918e-06	5.29516e-06	35	5	0.317842	0.806726
	8	UniRef90_A0A0R1S929	Cluster	C3	0.000493451	1.04865e-05	125	23	0	0	C1	0			8	UniRef90_A0A0E3UTK1	Days_since_visit1	Days_since_visit1	-5.15158e-06	1.6987e-06	125	38	0.0031136	0.515434	0.501693			COA.PWY.1..superpathway.of.coenzyme.A.biosynthesis.III..mammals.	DSC_all	not_DSC	0.000173148	0.00015513	35	30	0.274807	0.806726
	9	UniRef90_A0A0R1SB25	Cluster	C3	0.000429652	8.96461e-06	125	18	0	0	C1	0			9	UniRef90_A0A0E3UTK2	Days_since_visit1	Days_since_visit1	-4.97386e-06	1.67709e-06	125	34	0.00379822	0.515434	0.501693			COA.PWY..coenzyme.A.biosynthesis.I..prokaryotic.	DSC_all	not_DSC	0.000170239	0.000132941	35	33	0.212166	0.806726
	10	UniRef90_A0A0R1SB60	Cluster	C3	0.000477248	9.47468e-06	125	22	0	0	C1	0			10	UniRef90_A0A0E3UTK4	Days_since_visit1	Days_since_visit1	-5.27574e-06	1.72644e-06	125	41	0.00290283	0.515434	0.501693			COLANSYN.PWY..colanic.acid.building.blocks.biosynthesis	DSC_all	not_DSC	2.60442e-05	2.38611e-05	35	13	0.284949	0.806726
	11	UniRef90_A0A0R1SBB2	Cluster	C3	0.000454567	1.11381e-05	125	21	0	0	C1	0			11	UniRef90_A0A0E3UTK8	Days_since_visit1	Days_since_visit1	-4.19574e-06	1.36319e-06	125	32	0.00211067	0.515434	0.501693			COMPLETE.ARO.PWY..superpathway.of.aromatic.amino.acid.biosynthesis	DSC_all	not_DSC	0.000110416	7.5753e-05	35	19	0.157072	0.806726
	12	UniRef90_A0A0R1SBW3	Cluster	C3	0.000428593	9.72763e-06	125	21	0	0	C1	0			12	UniRef90_A0A0E3UTL2	Days_since_visit1	Days_since_visit1	-4.23109e-06	1.3946e-06	125	37	0.0024489	0.515434	0.501693			DTDPRHAMSYN.PWY..dTDP..beta..L.rhamnose.biosynthesis	DSC_all	not_DSC	0.000181571	0.000128066	35	25	0.167714	0.806726
	13	UniRef90_A0A0R1SDP2	Cluster	C3	0.000475373	1.04161e-05	125	22	0	0	C1	0			13	UniRef90_A0A0E3UTL4	Days_since_visit1	Days_since_visit1	-5.09854e-06	1.72826e-06	125	34	0.00397885	0.515434	0.501693			GLUCOSE1PMETAB.PWY..glucose.and.glucose.1.phosphate.degradation	DSC_all	not_DSC	8.68264e-05	9.50104e-05	35	7	0.368951	0.806726
	14	UniRef90_A0A2I1XM24	Cluster	C3	0.000518078	1.01004e-05	125	18	0	0	C1	0			14	UniRef90_A0A0E3UTL5	Days_since_visit1	Days_since_visit1	-4.66523e-06	1.5773e-06	125	34	0.00318654	0.515434	0.501693			GLUTORN.PWY..L.ornithine.biosynthesis.I	DSC_all	not_DSC	-4.71406e-05	3.47939e-05	35	6	0.186782	0.806726
	15	UniRef90_A0A2I1XMM3	Cluster	C3	0.00042277	1.04105e-05	125	20	0	0	C1	0			15	UniRef90_A0A0E3UTL7	Days_since_visit1	Days_since_visit1	-4.56067e-06	1.56059e-06	125	33	0.00356226	0.515434	0.501693			GLYCOGENSYNTH.PWY..glycogen.biosynthesis.I..from.ADP.D.Glucose.	DSC_all	not_DSC	0.000210156	0.000166494	35	23	0.217653	0.806726
	16	UniRef90_A0A2I1XMW5	Cluster	C3	0.000533382	1.13517e-05	125	24	0	0	C1	0			16	UniRef90_A0A0E3UTM0	Days_since_visit1	Days_since_visit1	-4.28558e-06	1.44337e-06	125	33	0.00303784	0.515434	0.501693			GLYCOLYSIS..glycolysis.I..from.glucose.6.phosphate.	DSC_all	not_DSC	-8.28008e-05	0.000107795	35	24	0.449443	0.806726
	17	UniRef90_A0A2I1XN15	Cluster	C3	0.000410521	1.02766e-05	125	22	0	0	C1	0			17	UniRef90_A0A0E3UTM2	Days_since_visit1	Days_since_visit1	-5.06114e-06	1.59705e-06	125	34	0.00158828	0.515434	0.501693			HISDEG.PWY..L.histidine.degradation.I	DSC_all	not_DSC	3.09231e-05	4.49334e-05	35	14	0.496137	0.806726
	18	UniRef90_A0A2I1XN60	Cluster	C3	0.000424821	1.05893e-05	125	20	0	0	C1	0			18	UniRef90_A0A0E3UTM8	Days_since_visit1	Days_since_visit1	-5.54702e-06	1.66545e-06	125	30	0.00122746	0.515434	0.501693			HISTSYN.PWY..L.histidine.biosynthesis	DSC_all	not_DSC	-5.48838e-05	3.79046e-05	35	7	0.159077	0.806726
	19	UniRef90_A0A2I1XNU4	Cluster	C3	0.000485968	9.39507e-06	125	19	0	0	C1	0			19	UniRef90_A0A0E3UTN0	Days_since_visit1	Days_since_visit1	-4.59254e-06	1.55918e-06	125	31	0.00330898	0.515434	0.501693			HSERMETANA.PWY..L.methionine.biosynthesis.III	DSC_all	not_DSC	4.25705e-05	6.09835e-05	35	18	0.491222	0.806726
	20	UniRef90_A0A2I1XPG9	Cluster	C3	0.000541739	9.03029e-06	125	14	0	0	C1	0			20	UniRef90_A0A0E3UTN4	Days_since_visit1	Days_since_visit1	-4.28565e-06	1.45087e-06	125	34	0.00319327	0.515434	0.501693			ILEUSYN.PWY..L.isoleucine.biosynthesis.I..from.threonine.	DSC_all	not_DSC	-5.2948e-05	5.90247e-05	35	16	0.377746	0.806726
	21	UniRef90_A0A2I1XPI9	Cluster	C3	0.000568618	1.11508e-05	125	13	0	0	C1	0			21	UniRef90_A0A0E3UTN6	Days_since_visit1	Days_since_visit1	-4.20967e-06	1.43403e-06	125	36	0.00338215	0.515434	0.501693			NAGLIPASYN.PWY..lipid.IVA.biosynthesis..E..coli.	DSC_all	not_DSC	3.48827e-05	4.85508e-05	35	14	0.477519	0.806726
	22	UniRef90_A0A2I1XPJ9	Cluster	C3	0.000728837	1.07581e-05	125	13	0	0	C1	0			22	UniRef90_A0A0E3UTN8	Days_since_visit1	Days_since_visit1	-3.10008e-06	1.0269e-06	125	31	0.00256095	0.515434	0.501693			NONMEVIPP.PWY..methylerythritol.phosphate.pathway.I	DSC_all	not_DSC	9.18226e-05	0.00011648	35	20	0.43759	0.806726
	23	UniRef90_A0A2I1XPK0	Cluster	C3	0.000574912	1.02194e-05	125	13	0	0	C1	0			23	UniRef90_A0A0E3UTP5	Days_since_visit1	Days_since_visit1	-2.93776e-06	9.5536e-07	125	24	0.00218595	0.515434	0.501693			OANTIGEN.PWY..O.antigen.building.blocks.biosynthesis..E..coli.	DSC_all	not_DSC	0.000246727	0.000134096	35	25	0.0770118	0.806726
	24	UniRef90_A0A2I1XQD1	Cluster	C3	0.000438158	1.12528e-05	125	19	0	0	C1	0			24	UniRef90_A0A0E3UTP7	Days_since_visit1	Days_since_visit1	-3.16061e-06	1.01233e-06	125	26	0.00182147	0.515434	0.501693			P105.PWY..TCA.cycle.IV..2.oxoglutarate.decarboxylase.	DSC_all	not_DSC	9.02734e-06	7.90202e-06	35	4	0.265278	0.806726
	25	UniRef90_A0A2I1XQJ3	Cluster	C3	0.000415952	1.02623e-05	125	22	0	0	C1	0			25	UniRef90_A0A0E3UTQ6	Days_since_visit1	Days_since_visit1	-4.21606e-06	1.45741e-06	125	34	0.0038815	0.515434	0.501693			P161.PWY..acetylene.degradation..anaerobic.	DSC_all	not_DSC	7.65773e-05	5.35833e-05	35	19	0.164635	0.806726
	26	UniRef90_A0A2I1XQM8	Cluster	C3	0.000398964	9.81454e-06	125	21	0	0	C1	0			26	UniRef90_A0A0E3UTR4	Days_since_visit1	Days_since_visit1	-3.51504e-06	1.1805e-06	125	31	0.0029067	0.515434	0.501693			P164.PWY..purine.nucleobases.degradation.I..anaerobic.	DSC_all	not_DSC	-4.81489e-05	3.44613e-05	35	14	0.173886	0.806726
	27	UniRef90_A0A2I1XQY1	Cluster	C3	0.000462125	1.06316e-05	125	19	0	0	C1	0			27	UniRef90_A0A0E3UTR8	Days_since_visit1	Days_since_visit1	-5.53228e-06	1.76174e-06	125	37	0.00224033	0.515434	0.501693			P41.PWY..pyruvate.fermentation.to.acetate.and..S..lactate.I	DSC_all	not_DSC	0.000176142	0.000252113	35	32	0.491183	0.806726
	28	UniRef90_C4VK56	Cluster	C3	0.000495819	1.11372e-05	125	25	0	0	C1	0			28	UniRef90_A0A0E3UTS1	Days_since_visit1	Days_since_visit1	-3.30313e-06	1.15351e-06	125	36	0.00418941	0.515434	0.501693			PANTO.PWY..phosphopantothenate.biosynthesis.I	DSC_all	not_DSC	0.000220201	0.00015292	35	20	0.161323	0.806726
	29	UniRef90_C4VK57	Cluster	C3	0.000451544	1.00478e-05	125	20	0	0	C1	0			29	UniRef90_A0A0E3UTS5	Days_since_visit1	Days_since_visit1	-4.04844e-06	1.34619e-06	125	32	0.00266216	0.515434	0.501693			PANTOSYN.PWY..superpathway.of.coenzyme.A.biosynthesis.I..bacteria.	DSC_all	not_DSC	7.65008e-05	9.53301e-05	35	19	0.4295	0.806726
	30	UniRef90_C4VK60	Cluster	C3	0.000483787	1.13381e-05	125	26	0	0	C1	0			30	UniRef90_A0A0E3UTS7	Days_since_visit1	Days_since_visit1	-3.84374e-06	1.32816e-06	125	34	0.00383235	0.515434	0.501693			PENTOSE.P.PWY..pentose.phosphate.pathway	DSC_all	not_DSC	5.62392e-05	5.20012e-05	35	18	0.289589	0.806726
	31	UniRef90_C4VK62	Cluster	C3	0.000472054	1.11011e-05	125	20	0	0	C1	0			31	UniRef90_A0A0E3UTU8	Days_since_visit1	Days_since_visit1	-3.49531e-06	1.10021e-06	125	34	0.00148992	0.515434	0.501693			PEPTIDOGLYCANSYN.PWY..peptidoglycan.biosynthesis.I..meso.diaminopimelate.containing.	DSC_all	not_DSC	0.000205434	0.000156993	35	33	0.202858	0.806726
	32	UniRef90_C4VK75	Cluster	C3	0.000596249	1.01137e-05	125	21	0	0	C1	0			32	UniRef90_A0A0E3UTV4	Days_since_visit1	Days_since_visit1	-3.93779e-06	1.24115e-06	125	34	0.001516	0.515434	0.501693			PHOSLIPSYN.PWY..superpathway.of.phospholipid.biosynthesis.I..bacteria.	DSC_all	not_DSC	2.06166e-05	2.02664e-05	35	11	0.318357	0.806726
	33	UniRef90_C4VK81	Cluster	C3	0.000438856	9.26921e-06	125	25	0	0	C1	0			33	UniRef90_A0A0E3UTV9	Days_since_visit1	Days_since_visit1	-4.0787e-06	1.34687e-06	125	34	0.00248543	0.515434	0.501693			PPGPPMET.PWY..ppGpp.metabolism	DSC_all	not_DSC	6.69697e-06	6.01802e-06	35	7	0.266594	0.806726
	34	UniRef90_C4VK88	Cluster	C3	0.000467044	1.11462e-05	125	23	0	0	C1	0			34	UniRef90_A0A0E3UTW5	Days_since_visit1	Days_since_visit1	-3.77659e-06	1.27988e-06	125	33	0.00318607	0.515434	0.501693			PWY.1269..CMP.3.deoxy.D.manno.octulosonate.biosynthesis	DSC_all	not_DSC	3.09367e-05	1.75956e-05	35	13	0.0905833	0.806726
	35	UniRef90_C4VKA6	Cluster	C3	0.000499939	9.8926e-06	125	19	0	0	C1	0			35	UniRef90_A0A0E3UTW7	Days_since_visit1	Days_since_visit1	-3.65116e-06	1.23064e-06	125	35	0.00301551	0.515434	0.501693			PWY.241..C4.photosynthetic.carbon.assimilation.cycle..NADP.ME.type	DSC_all	not_DSC	1.12629e-05	1.5004e-05	35	16	0.459757	0.806726
	36	UniRef90_C4VKA7	Cluster	C3	0.000524796	9.81633e-06	125	22	0	0	C1	0			36	UniRef90_A0A0E3UTW8	Days_since_visit1	Days_since_visit1	-4.11898e-06	1.42423e-06	125	34	0.00388176	0.515434	0.501693			PWY.2941..L.lysine.biosynthesis.II	DSC_all	not_DSC	0.000113442	8.6952e-05	35	22	0.201035	0.806726
	37	UniRef90_C4VKA8	Cluster	C3	0.000471469	1.1296e-05	125	19	0	0	C1	0			37	UniRef90_A0A0E3UTX2	Days_since_visit1	Days_since_visit1	-3.99628e-06	1.30582e-06	125	33	0.00222762	0.515434	0.501693			PWY.3001..superpathway.of.L.isoleucine.biosynthesis.I	DSC_all	not_DSC	-4.04742e-05	5.64365e-05	35	13	0.479529	0.806726
	38	UniRef90_C4VKB2	Cluster	C3	0.000387111	9.26393e-06	125	22	0	0	C1	0			38	UniRef90_A0A0E3UTX3	Days_since_visit1	Days_since_visit1	-3.48974e-06	1.0951e-06	125	33	0.00144125	0.515434	0.501693			PWY.3841..folate.transformations.II..plants.	DSC_all	not_DSC	0.000236601	0.000122239	35	33	0.0640753	0.806726
	39	UniRef90_C4VKB4	Cluster	C3	0.000479755	1.03859e-05	125	22	0	0	C1	0			39	UniRef90_A0A0E3UTX5	Days_since_visit1	Days_since_visit1	-4.08475e-06	1.4203e-06	125	30	0.00408334	0.515434	0.501693			PWY.4041...gamma..glutamyl.cycle	DSC_all	not_DSC	-3.85455e-05	4.50909e-05	35	17	0.400199	0.806726
[truncated: 112,051 more rows]

## Sheet: 5.M2 virus fam. interact. model
Supplementary Table 5: MaAsLin2 analysis of interaction between time and shedder/non-shedder status, virus family relative abundance
Input feature table: virus family relative abundance
[truncated: 15 more rows]

## Sheet: 6. Anellovirus accessions
Supplementary Table 6: Reference anellovirus sequences retrieved from GenBank
[truncated: 83 more rows]

[truncated: 1 more sheets: 7. Papillomavirus accessions]
